# Supplementary material for: Physiological dynamics of body temperature and heart rate during hibernation periods in male Japanese black bears (Ursus thibetanus japonicus)
Source: PeerJ. 2026 Feb 17;14:e20798. doi: 10.7717/peerj.20798 (PMC12922586; doi:10.7717/peerj.20798)
Supplement: Supplemental Information 1 — The first and second sheets were daily average data for heart rate and body temperature of 6 Japanese black bears. The following sheets were the raw data of the heart rate and body temperature of the six bears, with an additional 24, 12, and 6 h average calculations [file peerj-14-20798-s001.xlsx]

## Sheet: Heart rate
Date	No.56	No.184	No.13	No.17	No.114	No.1
2017-09-12	78.7708				74.0417	62.3043
2017-09-13	95.425		81.5833		79.6522	61.087
2017-09-14	85.9348		95.2917		79.875	67.0833
2017-09-15	82.2292		90.6522		67.913	96.913
2017-09-16	80.2564		82.3478		78.4348	81.6667
2017-09-17	82.1522		88.7917		80.8696	74.8333
2017-09-18	76.3415		92.65		86.3478	70.55
2017-09-19	79.1818		86.25		93.2273	73.6667
2017-09-20	79.2		79.875		89.3043	83.5294
2017-09-21	80.1818		83.913		85.8696	70.6522
2017-09-22	86.2826		82.4583		84.6818	70.619
2017-09-23	81.9574		79.4545		85	71.3913
2017-09-24	75.5652		84.7826		83.6522	70.2381
2017-09-25	73.3415		91		83.913	64.35
2017-09-26	79.9091		90.9565		89.9167	92.0625
2017-09-27	79.2558		86.4167		81.9167	73.5909
2017-09-28	83.8049		86.0909		80.0417	79.75
2017-09-29	72.0465		86.6667		75.5417	71.5217
2017-09-30	74.8542		92.3478		86.7083	68.4167
2017-10-01	68.3953		91.6667		83.4348	83.8182
2017-10-02	80.4667		89.5909		88	68.25
2017-10-03	77.7391		86.1111		88.2083	86.913
2017-10-04	80.0222		99.5455		86.8261	83.6087
2017-10-05	80.8043		84.6957		77.0833	65.1818
2017-10-06	81.587		88.3684		86.0455	73.4167
2017-10-07	74.6522		83.9444		93.0435	68.625
2017-10-08	76.7174		86.5652		87.6364	60.1739
2017-10-09	70.7609		102.158		80.1304	61.7895
2017-10-10	70.5435		98.3125		90.2917	75.625
2017-10-11	73.9268		98.2083		83.125	81.619
2017-10-12	76.9762		105.545		77.2174	69.7391
2017-10-13	64.0698		105.043		85.2917	67.125
2017-10-14	64.0435		104.789		85.5	61.1818
2017-10-15	68.4545		93.1579		78.7917	61.1905
2017-10-16	71.7273		91.9167		81.5417	67.8571
2017-10-17	68.8837		100.842		82.5217	77.9565
2017-10-18	68.8293		74.4286		80.125	59.3333
2017-10-19	65.2292		102.174		77.625	74.0435
2017-10-20	73.7333		87.5238		69.7826	62.8636
2017-10-21	74.0851		94.2105		71.7083	60.3478
2017-10-22	72.2		103		73.1739	77.2
2017-10-23	67.2826		88.9091		64.375	81.3333
2017-10-24	69.8444		95.6522		75.7917	80.8824
2017-10-25	79.4318		84.1905		72	77.913
2017-10-26	72.5625		101.316		77.7826	68.2105
2017-10-27	69.3953		92.0476		80.125	60.5
2017-10-28	73.2667		87		73.625	70.1579
2017-10-29	71.1042		86.1905		73.25	74.65
2017-10-30	74.3696		94.1176		77.25	72.1875
2017-10-31	76.3478		94.4		63.1667	70.619
2017-11-01	69.7174		75.15		69	67.1304
2017-11-02	64.087		63.3889		68.4783	64.45
2017-11-03	80.1064		68		70.5	79.6316
2017-11-04	62.0909	76.8372	62.0952		46.8333	73.7895
2017-11-05	57.2174	73.9535	49.0909		50.875	65.9091
2017-11-06	71.4565	84.1667	91.2727	87.3333	62.9583	95.9091
2017-11-07	78.0652	76.1951	93.3182	89.4167	64.75	88.4783
2017-11-08	74	72.8889	92.3158	92.4167	64.375	89.3333
2017-11-09	72.8409	81.9714	83.25	82.5217	61.5833	95.3333
2017-11-10	74.3864	72.95	92	82.2727	63.75	94.3333
2017-11-11	69.5909	78.6786	83.8696	86.2609	64.5833	96.4583
2017-11-12	71.6667	70.9412	83.1364	85.3913	64.2727	89.1667
2017-11-13	69.1818	66.2778	95.4583	86.2609	67.125	91.7083
2017-11-14	73.0638	73.8	81.619	85.7273	63.7917	98.875
2017-11-15	70.6222	71.2973	95.2174	79.5833	73.7826	92.3333
2017-11-16	72.1064	65.3333	90.4762	76	61.0417	95.9583
2017-11-17	74.7021	72.9355	91.5455	85.6364	60.4167	88.625
2017-11-18	67.383	71.0556	83.1905	90.2609	67	89.2083
2017-11-19	67.5778	65.6	95.3333	83.8947	64.5833	96
2017-11-20	70.8298	71	93.6522	80.0455	57.9583	85.875
2017-11-21	68.8182	62.475	86.75	79.7895	57.4091	91.2083
2017-11-22	72.1026	67.9744	88.7826	63.7619	54.5	87.7917
2017-11-23	68.3333	66.7778	78.25	58.3	44.1667	69.5833
2017-11-24	81.6098	56.28	64.3529	71.4211	46.8182	72.7917
2017-11-25	62.7381	51.2647	53.15	56.8095	38.7727	53.3333
2017-11-26	68.1579	57.2973	54.3333	44.0435	41.0417	49.2083
2017-11-27	69.4878	57.3514	47.1429	59.3	46.25	50.25
2017-11-28	72.6591	60.6765	54.619	47.55	47.7143	42.913
2017-11-29	71.4474	47.7436	47.0455	58.9524	46.0435	47.375
2017-11-30	72.3556	55.45	50.2381	49.8235	44	45.5417
2017-12-01	73.7955	55.9512	46.6087	52.5	52.9583	47.2083
2017-12-02	61.3415	42.1395	46.5	46.913	44.2273	47.6667
2017-12-03	54.325	43.2	50.125	42.7391	45.6667	46.0833
2017-12-04	60.1538	58.2444	37.2941	41.1304	34.381	46.2917
2017-12-05	60.8108	47.9778	48.087	46.2917	31.8333	42.375
2017-12-06	45.25	40.7632	40.4444	41.5	36.3	43.6667
2017-12-07	60.0263	45.7111	43.3889	44.0588	30.8947	41.1667
2017-12-08	71.6061	49.439	36.0476	40.4667	46.7727	32.381
2017-12-09	61.4706	45.0455	62.125	35.1667	35.0909	30.3158
2017-12-10	54.9	43.3778	35.25	40.6842	32.5	30.9444
2017-12-11	44.7333	43.375	42.5882	35.3125	41.9412	37.15
2017-12-12	76.3714	46.55	56.55	42.4167	41	27.0714
2017-12-13	49.6667	37.3095	50.7647	36.625	33.1579	29.6875
2017-12-14	60.7037	38.7027	33.8125	35.2632	35.6471	29.7
2017-12-15	64.3243	41.2703	35.2857	40.125	38.75	41.5
2017-12-16	65.1818	43.3077	43.3889	47.9	41.619	38
2017-12-17	69.8387	53.3158	38.8	43.6667	37.2381	48.5
2017-12-18	62.9556	50.8462	51.5	32.5	33.7	39.1667
2017-12-19	38.1154	35.9714	40.0769	35.4667	42.8571	30.2353
2017-12-20	53.0357	40.5476	45.9375	42.8889	33.6	31.2353
2017-12-21	65.1395	41.8974	33.3333	40.0769	30.4118	37.9412
2017-12-22	44.125	41.5946	57.5714	41.4545	39.4	29.8
2017-12-23	56.3	40.6923	35.9091	37.5556	37.4286	31.1333
2017-12-24	77	45.5526	34.1	35.5	36.7368	33.3333
2017-12-25	50.3103	62.3778	47.8667	38.0909	34.3125	44.0417
2017-12-26	67.7941	41.8293	31	32.0909	26.8	32.4583
2017-12-27	64.8293	40.0278	40.25	41.9286	41.5	32.4762
2017-12-28	58.1071	42.25	37.0714	49.9231	30.6667	30.4
2017-12-29	76.7143	51.2727	32	36	38.6875	36
2017-12-30	55.5862	43.7872	40.0667	39.375	50.2	28.4
2017-12-31	52.76	48.2174	37.7857	39.5455	28.9286	27.5
2018-01-01	74.2083	37.8043	36	32.5556	43.9474	31.5
2018-01-02	65.2927	37.641	38.9444	45.8182	42.9333	43.2667
2018-01-03	73	37.4286	49	32.3	35.8	36.4
2018-01-04	46.6842	44	40.5789	48.8571	40.9412	33.7647
2018-01-05	66.8409	43.2174	44.0714	41.2	36.8462	31.8571
2018-01-06	57.1707	37.2895	32.8571	35.7143	34.8333	33.7368
2018-01-07	63.375	38.8293	43.5556	35.7143	36.0769	29.4
2018-01-08	58.1316	55	49.4286	38.5556	45.4	33.0588
2018-01-09	63.275	45.9487	36.8	49.2222	34.9286	30.25
2018-01-10	75.303	40.0263	40	45.5	36.7143	36
2018-01-11	78.7907	44.5278	60.5556	46.3333	33.0833	31.6316
2018-01-12	74.1707	53.9111	36.5882	40.6667	32.8571	35.0476
2018-01-13	40.8125	45.4878	37.4118	37.4545	36.1333	33.6842
2018-01-14	50.4118	38.1905	41.4667	44.1111	40.1333	30.25
2018-01-15	57.0952	35.7619	37.6471	37.6429	55.3529	28.75
2018-01-16	39.6842	40.0682	27.2143	45.8462	37	41.1304
2018-01-17	70	43.2174	36.3684	43.0667	37.4615	30.6364
2018-01-18	64.9167	38.2821	37.5833	41	37.25	31.9091
2018-01-19	74.35	32	28.5	37.8889	37.1429	29.5
2018-01-20	48.8214	31.8182	41.2105	34.6667	63.8696	28.1333
2018-01-21	67.8529	43.878	39.6316	35.6923	93.4762	30
2018-01-22	68.8049	36.6977	39	41.3333	56.1667	56.9167
2018-01-23	63.4412	39.3889	71.5238	95.0952	34.5238	44.5
2018-01-24	60.5	40.1935	42.7333	34.25	57.0417	48.4167
2018-01-25	82.3448	44.4444	43.15	44.0435	63.5	40.9167
2018-01-26	86.875	42.7907	32.25	41.4783	59.9583	39.5
2018-01-27	60.0323	33.0286	35.75	38.1304	61.8333	42.4167
2018-01-28	81.9286	47.4103	39.875	33.5455	53.6667	41.4348
2018-01-29	75.8974	41.4884	36.8	28.75	56.375	41.9167
2018-01-30	59.1622	46.125	36.6	25.1333	56.875	38.4583
2018-01-31	60.5185	34.9211	33.3529	27.9333	56.0417	35.2083
2018-02-01	64.4286	39.0217	47.5333	31.625	54.375	25.9286
2018-02-02	61.7097	35.5714	39.2143	32.6429	43.0833	36.1667
2018-02-03	82.7778	31.9333	37.5	31.8125	46.5833	31.8
2018-02-04	73.359	40.3043	40.0556	45.8	47.125	40.2778
2018-02-05	58.9524	35.4444	32.6111	35.1053	41.6667	27.4444
2018-02-06	54.6111	39.075	34.9091	30	42.913	48.3333
2018-02-07	65.44	39.0952	33	36.8571	43.9545	33.3684
2018-02-08	78.0909	39.9348	38.25	30.1333	36.2273	36.2632
2018-02-09	65.8636	41.4054	35.7059	33.7727	39.75	33.9545
2018-02-10	55.1081	38.4091	33.5556	37.4615	37.9524	38
2018-02-11	69.4583	40.1163	36	41.7222	37.3889	37
2018-02-12	58.6061	38.7568	37.0952	44.6667	38.125	32.2857
2018-02-13	56.6765	33.6552	37.1364	39.8462	32.5789	32.2
2018-02-14	73.3111	38.6522	33.5882	45.25	39.6842	31.6667
2018-02-15	47.3226	39.3404	40.0526	37.3846	36.4762	39.9
2018-02-16	74.5385	43.2766	39.8824	34.6923	34.9	47.0588
2018-02-17	68.9783	43.2273	36.7619	52.1667	35.3889	25.9412
2018-02-18	52.5	41.6667	34.1765	39.1538	41.3529	42.7
2018-02-19	86.9	34.878	37.8235	38.6667	36.6111	34.6957
2018-02-20	68.0909	53.1489	43.6818	45.6667	46.5	26.6667
2018-02-21	52.0444	36.7447	39.7778	42.4545	42.6	55.35
2018-02-22	64.5238	53.6087	46.5	45.3125	39	33.7778
2018-02-23	57	40.8696	35.7059	37.3333	45.0667	38.4348
2018-02-24	72.3529	39.9574	38.5455	42.5	41.8235	34.8095
2018-02-25	59.1818	39.6875	34.5714	52.5	37.5	40.5909
2018-02-26	44.2069	39.3542	40.1176	40.5556	34.619	31.6818
2018-02-27	55.7143	43.8222	44.4737	39.4	39.6	33.8571
2018-02-28	64.7429	50.766	35.5556	43.7778	38.7778	30.4
2018-03-01	61.0513	50.25	45.9412	42.1176	35.75	31.8947
2018-03-02	56.1892	48.6042	39.7826	46.7273	28.875	38.0435
2018-03-03	47.5143	46.3125	43.2105	38.5385	47.8182	32.0526
2018-03-04	67.1429	37.4468	43.4444	44.381	44.9474	33.1333
2018-03-05	62.878	44	42.8421	39.6875	37.1667	39.0625
2018-03-06	59.8286	37.75	50.5556	46.0556	39.3	38.5625
2018-03-07	84.2778	40.6341	43.9091	39.2667	45.6667	40.2
2018-03-08	59.975	42.5217	43.3913	44	41.3889	45.0455
2018-03-09	61.2571	36.2766	49	42.1818	40.5	35.2174
2018-03-10	61	38.5106	38.7	37.8947	39.75	33.4783
2018-03-11	62.7105	42.087	41.3636	31.6875	50.6471	50.7
2018-03-12	66.7895	38.8	40	35.3333	50.1579	40.1429
2018-03-13	65.1707	40.9111	36.3889	33.2353	47.1818	46.0455
2018-03-14	70.1463	42.0682	43.75	39.619	38.9474	41.8261
2018-03-15	57.7727	39.8043	32.0476	38.8667	42.95	47.3043
2018-03-16	61.4634	39.4468	44.0455	36.7895	35.4706	47.5455
2018-03-17	55.1714	41.9778	47.0455	41.9524	30.4	44.8333
2018-03-18	53.4524	37.25	37.8182	48.6316	66.1667	61.1739
2018-03-19	62.8333	41.5435	38.5217	44	48.3333	56.4348
2018-03-20	72.7561	48.0213	48	31.9091	52.5417	63.4583
2018-03-21	67	40.0417	46.9524	37.5652	48.0417	59.913
2018-03-22	61.05	42.875	39.9474	36.4211	40	53.625
2018-03-23	71.2105	47.4545	32.7	35.8	59.4167	57.5
2018-03-24	67.4324	47.2444	42.9524	38.6842	46.5833	55.6087
2018-03-25	73.025	45.6667	42.1818	40.5455	41.7391	46.5532
2018-03-26	64.05	43.5217	47.9545	39.5263	34.35	48.9783
2018-03-27	59.4773	45.881	46.4545	44.4	40.1739	52.2667
2018-03-28	68.4524	45.6591	46.1818	47.2917	38
2018-03-29	65.2093	41.0435	48.3333	51.3636	42.4545
2018-03-30	61.3421	44.6739	41.65	45.9048	36.913
2018-03-31	67.525		48.4545	54.087	48.4783
2018-04-01	58.093		58.2609	45.6667	57.0833
2018-04-02	69.973		59.625	47.3182	56.2917
2018-04-03	71.0444		50.6667	53.1364	52.3333
2018-04-04	75.3158		48.087	55.1739	38.8182
2018-04-05	76.5952		62.7917	45.913	36.4583
2018-04-06	69.2		57.4167	47.3333	53.25
2018-04-07	84.3256		60.9091	50.4167	46.9565
2018-04-08	75.6304		52.6522	56.625	50.7727
2018-04-09	74.8333		58.6818	44.25	37.3182
2018-04-10	78.3902		67.4167	49.8261	41.1667
2018-04-11	68.5		58.9565	50.9167	67.8333
2018-04-12	80.4186		54.9091	39.9565	47.2083
2018-04-13	85.4359		49.9583	53.125	45.4783
2018-04-14	87.6667		73.1667	64	56.9167
2018-04-15	90.6579		78.5217	76.375	82.1667
2018-04-16	86.2051		74.1667	78.625	70.5833
2018-04-17	82.1026		78.3333	78.2174	72.5833
2018-04-18	89.2766		71.375	66.6957	65.0417
2018-04-19	84.8043		86.4167	76.3478	70.2083
2018-04-20	90.0732		75.25	76.1667	72
2018-04-21	75.4884		88.913	70.3636	66.75
2018-04-22	81.9318		71.7083	70.2083	61.5
2018-04-23	78.093		78.125	67.1739	85.5417
2018-04-24	84.5333		74.8333	76.5217	79.1667
2018-04-25	74.1333		83.0909	75.2174	70.9583
2018-04-26	90.1364		85.913	73	71.125
2018-04-27	81.0227		91.7727	85.9167	87.2083
2018-04-28	75.5652		88.087	87.6957	72.5417
2018-04-29	74.8409		92.25	86.1667	63.5833
2018-04-30	74.3191		86.3333	84.7391	57.9167
2018-05-01	77.5		96	93.1818	62
2018-05-02	75.1489		96	85.6087	69.75
2018-05-03	72.0208		93.2273	86.7143	75.4583
2018-05-04	68.5957		85.2083	82.5652	74
2018-05-05	78.5217		88.4583	79.4091	58.6522
2018-05-06	72.9565		78.7273	76.5909	66.6667
2018-05-07	70.3191		89.3333	83.2727	61.1667
2018-05-08	62.1064		85.9583	95.913	73.2174
2018-05-09	69.6667		82.7917	74.7917	74.5
2018-05-10	65.3636		69.3913	77.9583	69.75
2018-05-11	65.383		65.087	67.3333	72.9565
2018-05-12	72.6304		73.4783	74.7391	54.9583
2018-05-13	56.0465		75.5217	68.3478	54.7083
2018-05-14			64.5	63.381

## Sheet: Body temperature
Date	No.56	No.184	No.13	No.17	No.114	No.1
2017-09-12	36.4608				36.6646	36.5004
2017-09-13	36.4445		37.2483		36.74	37.0067
2017-09-14	36.439		37.4671		37.0417	37.0721
2017-09-15	36.4373		37.265		36.7429	37.3121
2017-09-16	36.3929		37.0658		37.0408	37.0296
2017-09-17	36.3163		37.4658		37.045	36.9771
2017-09-18	36.3488		36.8913		36.9871	36.9346
2017-09-19	36.2161		36.955		36.9138	37.0042
2017-09-20	36.3012		37.0458		37.1325	36.94
2017-09-21	36.3492		36.9842		37.0662	37.0667
2017-09-22	36.3614		36.9317		36.9621	36.9825
2017-09-23	36.3965		36.9875		36.9779	36.9167
2017-09-24	36.4808		37.0696		36.8454	36.9179
2017-09-25	36.5022		37.1067		37.0946	36.8983
2017-09-26	36.5247		36.9183		36.8883	36.9054
2017-09-27	36.3167		37.18		37.0083	37.2488
2017-09-28	36.4592		37.2629		36.8446	36.9967
2017-09-29	36.2131		37.1971		36.5913	37.1292
2017-09-30	36.221		37.06		36.6679	36.7388
2017-10-01	36.1351		37.105		36.6958	36.8533
2017-10-02	36.4388		37.2642		36.8142	36.6608
2017-10-03	36.2961		37.2096		36.6925	37.0142
2017-10-04	36.4151		37.4721		36.9492	37.2546
2017-10-05	36.5133		37.5225		36.7717	37.065
2017-10-06	36.2555		37.1417		36.4838	36.9942
2017-10-07	36.1606		36.99		36.5758	37.0233
2017-10-08	36.3604		36.965		36.2254	36.6187
2017-10-09	36.1992		37.4229		36.7	36.7837
2017-10-10	36.4027		37.3437		36.7638	37.12
2017-10-11	36.1878		37.3775		37.1562	37.3158
2017-10-12	36.1782		37.2387		36.7517	37.045
2017-10-13	36.2506		36.9854		36.6008	36.6433
2017-10-14	36.2492		37.2496		36.9808	36.8875
2017-10-15	36.292		36.9638		36.8808	37.0208
2017-10-16	36.348		37.1654		36.5875	37.1592
2017-10-17	36.3598		37.1454		36.4221	37.0946
2017-10-18	36.1151		37.2967		36.5233	36.79
2017-10-19	36.2249		36.7242		36.3954	37.3379
2017-10-20	36.4122		37.2204		36.2496	36.9263
2017-10-21	36.4365		36.9308		36.5133	36.9792
2017-10-22	36.3392		37.0387		36.41	36.7217
2017-10-23	36.142		36.6025		36.1942	37.0975
2017-10-24	36.1559		36.7092		36.3021	37.3946
2017-10-25	36.2612		37.1217		36.5721	37.2571
2017-10-26	36.3363		36.7658		36.5812	36.99
2017-10-27	36.3171		36.8796		36.6133	36.9162
2017-10-28	36.4051		36.7858		36.4525	36.7517
2017-10-29	36.5578		36.87		36.4142	36.8963
2017-10-30	36.4035		36.4396		36.3171	36.8058
2017-10-31	36.1655		36.8883		35.9946	36.9329
2017-11-01	36.5735		36.2962		36.335	36.9637
2017-11-02	36.3261		35.9767		35.9183	36.3767
2017-11-03	34.2314		35.9671		36.3096	37.1817
2017-11-04	35.2661	36.1524	36.1317		34.7837	35.3304
2017-11-05	35.5847	36.899	35.7204		36.0921	35.88
2017-11-06	35.4522	36.3844	36.4125	36.5958	36.0383	37.4263
2017-11-07	35.882	36.3525	36.9233	36.7546	35.9712	37.4487
2017-11-08	35.7992	36.1975	36.3954	36.8746	36.0433	37.0825
2017-11-09	35.718	36.1404	36.5421	36.7983	35.7125	37.4967
2017-11-10	35.7584	36.1715	36.7804	36.8583	35.9937	37.3212
2017-11-11	35.8441	36.1344	36.8479	36.8362	35.5187	37.3596
2017-11-12	35.2696	36.0717	36.83	37.0158	36.0012	37.0542
2017-11-13	35.5918	35.8771	37.11	36.9629	35.8121	37.2471
2017-11-14	36.0071	36.2185	36.8346	37.0304	36.11	37.3833
2017-11-15	35.5584	36.2583	36.7383	36.8354	35.8462	37.1142
2017-11-16	35.2176	35.981	36.9242	36.9775	36.215	37.0588
2017-11-17	35.3827	36.0204	36.96	36.9383	35.3742	37.3608
2017-11-18	34.9245	36.141	36.9538	37.0046	35.7292	37.2483
2017-11-19	35.3302	35.8796	36.7063	36.9233	35.8013	37.1763
2017-11-20	35.522	35.7788	36.5062	37.0737	35.91	37.4183
2017-11-21	35.7133	35.9215	36.6708	36.9817	35.645	37.0754
2017-11-22	35.4373	35.7237	36.5312	36.8596	35.8217	37.2992
2017-11-23	35.25	35.5237	35.6142	37.2133	35.2071	36.5404
2017-11-24	35.869	35.2244	35.76	36.6337	34.6171	36.0942
2017-11-25	35.2069	35.2198	35.7183	36.6079	34.8292	35.9254
2017-11-26	35.429	35.1652	35.5288	36.5771	34.5796	36.0679
2017-11-27	34.9069	35.229	35.5404	36.6796	34.6192	36.0492
2017-11-28	35.0465	35.1788	35.7767	36.6408	34.2267	35.8521
2017-11-29	34.972	35.4373	35.3229	36.4283	34.6583	36.2621
2017-11-30	34.8496	35.206	35.4488	36.2321	34.2238	36.0667
2017-12-01	35.3339	35.5504	35.7283	36.3475	34.9	35.8671
2017-12-02	35.0555	35.3202	35.9113	36.2742	34.8571	36.0558
2017-12-03	34.9827	34.6642	35.4471	36.0054	35.1112	35.9675
2017-12-04	35.251	35.0017	35.5217	36.0292	35.0258	35.9654
2017-12-05	34.4543	34.6706	35.6458	35.8854	34.4738	36.0063
2017-12-06	34.3912	34.9533	35.2442	35.5492	34.8904	35.9925
2017-12-07	34.5335	34.9512	35.5558	35.3704	34.1958	35.9283
2017-12-08	34.5659	35.0119	35.3067	35.6587	35.1533	35.1337
2017-12-09	34.3931	34.6575	35.2321	35.7108	34.9708	35.0979
2017-12-10	34.2978	34.9379	35.2354	35.3096	35.1033	34.2829
2017-12-11	34.4396	34.825	35.0167	35.3871	34.8183	34.3725
2017-12-12	34.6	34.9815	34.7417	34.9258	34.7888	34.3942
2017-12-13	34.5745	34.7656	35.3137	35.5308	34.7912	34.4283
2017-12-14	34.9388	34.3058	34.9308	35.3033	34.8188	33.8033
2017-12-15	34.7755	35.1767	34.5842	35.4946	34.8379	35.3671
2017-12-16	34.9324	35.0375	34.5154	35.42	34.965	34.8054
2017-12-17	34.7516	34.7479	34.7767	35.0721	35.1154	37.0554
2017-12-18	34.9482	34.88	34.8642	35.0358	35.0808	36.7175
2017-12-19	34.9988	34.474	34.9175	35.1458	34.9104	35.9071
2017-12-20	34.5502	35.0867	35.1058	35.115	34.4725	35.2725
2017-12-21	34.5414	34.751	34.28	35.5296	34.4271	35.1962
2017-12-22	34.5616	35.0254	35.1304	34.9738	34.5421	34.4162
2017-12-23	34.7092	33.9681	34.5363	35.4042	34.7433	34.785
2017-12-24	34.3976	34.3115	35.36	34.97	35.0929	33.7079
2017-12-25	35.1598	35.4952	35.3275	35.0479	34.9108	36.87
2017-12-26	34.7741	35.2673	35.2663	35.2537	34.6587	36.6625
2017-12-27	35.0559	35.1998	34.8625	35.1046	34.3675	35.3042
2017-12-28	34.6624	34.9346	34.9529	35.7233	33.5608	34.6417
2017-12-29	34.5078	35.109	34.2104	34.7492	35.1796	34.3596
2017-12-30	34.1539	36.6096	35.7025	35.4825	34.8417	34.1471
2017-12-31	34.3902	36.944	34.3546	35.0533	35.1858	33.9487
2018-01-01	34.5649	37.1348	35.4267	35.0988	35.1429	34.1783
2018-01-02	34.7116	36.5075	34.8933	34.9237	34.6058	33.6396
2018-01-03	34.3022	35.7971	35.4487	34.9142	34.9913	35.02
2018-01-04	34.8494	35.8687	35.6746	34.7104	34.5262	35.5412
2018-01-05	34.118	35.9779	35.6013	34.4604	34.1908	34.3479
2018-01-06	34.3204	34.9094	35.4075	35.0692	34.24	35.0167
2018-01-07	34.242	33.8335	35.2412	34.7225	34.515	35.0521
2018-01-08	34.3194	33.8167	35.2821	35.1142	34.8121	34.5221
2018-01-09	34.4663	34.2431	34.8971	34.6104	35.1317	33.8133
2018-01-10	34.7104	34.1244	35.4871	34.9708	35.4125	33.8442
2018-01-11	34.3761	33.3106	34.8208	34.885	35.2704	35.3604
2018-01-12	33.8406	35.4627	34.9567	34.7354	33.6721	36.4175
2018-01-13	34.8937	34.7071	34.945	34.4562	34.4371	35.69
2018-01-14	34.8869	34.2942	35.0004	34.6125	34.2446	34.4196
2018-01-15	34.4512	34.1717	34.4433	35.155	34.2458	34.0417
2018-01-16	34.2916	34.6006	35.0383	34.5887	34.9925	35.2317
2018-01-17	34.0635	35.24	35.1838	34.8208	34.3225	34.495
2018-01-18	34.8053	35.1471	34.8287	34.8533	34.8283	33.5962
2018-01-19	34.6153	34.0092	34.6454	34.3283	33.9675	34.1567
2018-01-20	34.869	33.9835	35.0475	35.1646	36.1771	34.2137
2018-01-21	34.7341	34.9404	35.6179	36.0067	33.25	34.2754
2018-01-22	35.2967	35.0937	35.2046	35.3588	36.1354	37.6704
2018-01-23	35.0404	35.431	35.4908	37.5988	33.4554	37.4267
2018-01-24	35.0459	33.8098	35.5358	35.7733	35.5513	37.8375
2018-01-25	35.079	34.8908	36.56	37.1017	36.875	37.0479
2018-01-26	34.6169	34.6544	36.5262	37.3533	36.7683	36.7471
2018-01-27	34.6084	34.9025	36.1863	37.1071	36.8987	36.6892
2018-01-28	34.0212	34.2242	35.1092	36.3738	37.0208	37.3738
2018-01-29	34.0916	34.4931	35.2983	36.1512	36.9796	37.4721
2018-01-30	34.5812	35.7998	34.9783	35.4633	37.1942	36.7904
2018-01-31	34.1155	35.0869	35.0663	35.4038	36.6362	35.9175
2018-02-01	34.6592	35.4333	34.135	34.9146	36.605	34.9838
2018-02-02	34.9892	35.2225	35.4417	35.5613	36.4696	35.0271
2018-02-03	34.3841	34.3175	34.6642	35.3629	36.1833	34.2679
2018-02-04	34.5273	34.791	34.7767	35.2292	35.7679	35.1008
2018-02-05	35.0382	34.6554	34.4921	35.4263	35.725	34.0821
2018-02-06	34.9296	34.9556	35.0267	35.3175	35.6942	35.2158
2018-02-07	34.7155	34.2194	34.3008	34.85	35.4633	35.0521
2018-02-08	34.7133	35.6977	35.0162	34.8379	35.3717	35.6521
2018-02-09	34.9755	34.61	34.65	34.9454	35.1933	35.5446
2018-02-10	34.6035	35.1975	35.0946	35.0133	34.8575	35.0658
2018-02-11	34.8984	35.1342	35.35	35.5304	34.9779	35.4412
2018-02-12	35.3116	34.5735	35.5079	34.9312	35.0558	34.5712
2018-02-13	35.5414	34.5681	35.645	34.5317	34.705	35.085
2018-02-14	35.1873	34.9765	35.6	34.3058	35.0821	34.3987
2018-02-15	35.1229	35.6529	35.6217	35.0204	34.9696	34.2642
2018-02-16	35.3094	35.859	35.7179	35.1021	34.6437	35.1958
2018-02-17	34.6339	35.2519	35.5942	34.5929	35.0042	35.0079
2018-02-18	35.3114	35.9125	35.7167	34.6779	34.8825	34.1021
2018-02-19	34.7367	34.9779	35.2988	34.9158	34.3517	35.5246
2018-02-20	35.0545	35.6825	35.3887	34.6783	34.9754	35.2183
2018-02-21	35.149	35.9538	35.5837	34.9658	34.9229	35.5771
2018-02-22	35.2833	36.0856	35.3754	35.0825	34.9888	35.8858
2018-02-23	35.409	36.084	35.4608	35.6421	35.1867	35.7587
2018-02-24	35.7363	35.6667	35.7067	35.4904	34.7454	35.5187
2018-02-25	35.7837	35.3898	35.1996	35.365	34.7767	35.5196
2018-02-26	35.57	35.4571	35.7008	35.2254	34.6896	35.9625
2018-02-27	35.6688	35.3683	35.6337	34.85	34.7946	36.01
2018-02-28	35.6931	36.0008	35.325	35.2496	35.3038	35.7275
2018-03-01	35.4718	36.6021	35.5629	35.6642	35.7154	36.1829
2018-03-02	35.4829	36.451	35.7237	35.5292	35.3175	36.3875
2018-03-03	35.5102	36.294	35.9254	35.1992	35.1325	36.4108
2018-03-04	35.069	35.4773	35.4438	34.6112	34.93	35.7967
2018-03-05	35.5682	35.3523	35.8775	35.2825	34.9258	35.5142
2018-03-06	35.8965	35.1438	35.28	36.0246	34.1975	35.5667
2018-03-07	35.4776	34.729	35.7625	35.7742	35.3454	35.575
2018-03-08	35.7873	35.0665	35.05	35.6863	35.4267	35.63
2018-03-09	35.608	35.1733	35.9517	35.6842	35.1633	35.9738
2018-03-10	35.2224	35.0448	36.0975	35.6383	35.5083	36.2271
2018-03-11	35.7971	35.2106	35.335	35.86	35.2754	36.1992
2018-03-12	35.2496	35.1133	35.7321	35.74	35.6275	36.1496
2018-03-13	35.5892	35.4456	35.8471	35.6171	36.0175	36.2679
2018-03-14	35.3869	35.3362	35.2008	35.3158	35.8979	35.8808
2018-03-15	35.2127	35.5819	35.4763	35.9454	35.6037	36.0496
2018-03-16	35.338	35.6669	36.4183	36.0854	35.6821	35.8558
2018-03-17	35.4853	35.6873	35.0521	35.9562	35.3462	35.995
2018-03-18	35.2337	35.6352	35.5192	35.6804	36.3554	36.0354
2018-03-19	34.9786	35.39	35.1383	34.9854	36.8225	36.2758
2018-03-20	35.1143	35.9096	34.9717	35.6804	37.1154	36.2633
2018-03-21	35.0769	35.7054	36.1262	35.5958	36.7112	36.0842
2018-03-22	34.8086	35.6292	36.28	35.5392	36.6671	35.6783
2018-03-23	34.6708	35.7369	36.1896	35.8817	36.8842	35.6133
2018-03-24	34.6976	35.8619	35.7713	35.5496	36.7721	35.6354
2018-03-25	34.6839	35.7144	35.7883	35.5921	36.2662	35.8181
2018-03-26	35.0782	35.6804	35.7404	35.2371	35.9712	35.9154
2018-03-27	34.8392	35.781	35.8187	35.3612	36.0546	35.6042
2018-03-28	34.7618	35.7913	35.7921	35.3217	35.7833
2018-03-29	34.6567	35.6425	35.5767	35.1117	35.9421
2018-03-30	34.8076	35.5656	35.6362	35.3567	35.9012
2018-03-31	34.8212		35.4458	34.7804	36.1283
2018-04-01	35.0822		35.1417	35.0292	36.0913
2018-04-02	35.1418		35.5533	35.1638	36.0879
2018-04-03	34.8308		34.7592	33.9712	35.8933
2018-04-04	34.8402		34.2025	34.2221	35.5975
2018-04-05	34.7767		35.0567	34.6796	35.7117
2018-04-06	34.841		34.2179	34.8796	35.7067
2018-04-07	34.9322		34.1475	34.6187	35.9283
2018-04-08	35.1371		34.3054	33.7413	35.7675
2018-04-09	35.3094		35.0871	35.0204	35.2987
2018-04-10	35.1769		36.0813	34.9679	35.3263
2018-04-11	35.1676		35.1325	35.7025	35.4354
2018-04-12	35.4561		35.7554	35.625	35.4179
2018-04-13	35.2612		35.2992	35.7154	34.9733
2018-04-14	35.2812		36.1779	36.1725	35.8188
2018-04-15	34.8596		35.9842	35.3079	36.7646
2018-04-16	35.2882		36.0787	36.3433	37.02
2018-04-17	35.0647		36.0579	35.5529	36.8392
2018-04-18	35.3806		36.2308	35.9883	36.3062
2018-04-19	35.2722		34.5683	35.0913	36.7442
2018-04-20	35.1657		35.7867	35.8075	36.6817
2018-04-21	35.5935		36.1204	35.3371	36.5779
2018-04-22	35.5629		36.7488	35.8212	36.0842
2018-04-23	35.0476		35.8588	35.2021	36.6404
2018-04-24	35.5653		35.7587	35.1717	36.8058
2018-04-25	35.1237		36.0629	35.5021	36.0262
2018-04-26	34.9624		35.2958	34.8492	35.0925
2018-04-27	35.2202		37.2542	35.21	35.4417
2018-04-28	34.9706		36.8529	35.8758	35.1863
2018-04-29	34.9222		36.5604	35.8133	35.8154
2018-04-30	35.1616		36.3704	35.9062	35.8721
2018-05-01	35.4155		36.4513	35.7933	35.86
2018-05-02	35.62		36.2279	35.4621	35.3925
2018-05-03	35.5361		35.8833	35.9246	36.3137
2018-05-04	35.1414		36.2017	35.6617	36.0017
2018-05-05	35.1406		35.8392	35.29	35.4263
2018-05-06	34.9773		36.4142	36.3013	35.5712
2018-05-07	35.3443		36.1492	35.89	35.9783
2018-05-08	36.0269		36.2487	35.9125	35.5371
2018-05-09	36.3524		35.5917	35.8312	35.2867
2018-05-10	36.012		35.9642	35.76	35.0733
2018-05-11	35.7947		35.7138	35.3875	35.2333
2018-05-12	35.8649		35.8254	35.8438	35.5117
2018-05-13			35.8125	35.8271	34.6442
2018-05-14			35.5629	36.0025

## Sheet: No.1
No	Date	Time	Heart rate(bpm)	Temp(°C)		HR 24h average	HR 12h average	HR 6h average		Tb 24h average	Tb 12h average	Tb 6h average
1	2017-09-11	00:00:00	46	37.1
2	2017-09-11	00:30:00	46	37.1
3	2017-09-11	01:00:00	45	36.76
4	2017-09-11	01:30:00	63	36.2
5	2017-09-11	02:00:00	43	36.76
6	2017-09-11	02:30:00	45	36.96
7	2017-09-11	03:00:00	34	36.85
8	2017-09-11	03:30:00	50	36.65
9	2017-09-11	04:00:00		35.59
10	2017-09-11	04:30:00	46	35.42
11	2017-09-11	05:00:00	44	35.54
12	2017-09-11	05:30:00	43	36.2				45.9091				36.4275
13	2017-09-11	06:00:00	34	36.31				44.8182				36.3617
14	2017-09-11	06:30:00	34	36.43				43.7273				36.3058
15	2017-09-11	07:00:00		36.43				43.6				36.2783
16	2017-09-11	07:30:00	89	35.54				46.2				36.2233
17	2017-09-11	08:00:00	50	35.65				46.9				36.1308
18	2017-09-11	08:30:00	97	35.87				52.1				36.04
19	2017-09-11	09:00:00	50	36.2				53.7				35.9858
20	2017-09-11	09:30:00	147	36.06				63.4				35.9367
21	2017-09-11	10:00:00	80	36.09				64.9091				35.9783
22	2017-09-11	10:30:00	49	36.09				65.1818				36.0342
23	2017-09-11	11:00:00	44	36.09				65.1818				36.08
24	2017-09-11	11:30:00	117	35.54			58.9091	71.9091			36.2263	36.025
25	2017-09-11	12:00:00	113	35.76			61.9545	79.0909			36.1704	35.9792
26	2017-09-11	12:30:00	34	36.06			61.4091	79.0909			36.1271	35.9483
27	2017-09-11	13:00:00	107	36.09			64.2273	81.4167			36.0992	35.92
28	2017-09-11	13:30:00	73	36.31			64.6818	80.0833			36.1038	35.9842
29	2017-09-11	14:00:00	60	36.43			65.4545	80.9167			36.09	36.0492
30	2017-09-11	14:30:00	76	36.65			66.8636	79.1667			36.0771	36.1142
31	2017-09-11	15:00:00	73	36.68			68.6364	81.0833			36.07	36.1542
32	2017-09-11	15:30:00	74	36.65			69.7273	75			36.07	36.2033
33	2017-09-11	16:00:00		36.54			69.7273	74.5455			36.1096	36.2408
34	2017-09-11	16:30:00	119	36.45			73.0455	80.9091			36.1525	36.2708
35	2017-09-11	17:00:00	74	36.54			74.4091	83.6364			36.1942	36.3083
36	2017-09-11	17:30:00	56	36.76			75	78.0909			36.2175	36.41
37	2017-09-11	18:00:00	50	36.54			75.7273	72.3636			36.2271	36.475
38	2017-09-11	18:30:00	51	36.43			76.5	73.9091			36.2271	36.5058
39	2017-09-11	19:00:00	48	36.65			75.2609	68.5455			36.2362	36.5525
40	2017-09-11	19:30:00	49	36.65			73.5217	66.3636			36.2825	36.5808
41	2017-09-11	20:00:00	48	36.54			73.4348	65.2727			36.3196	36.59
42	2017-09-11	20:30:00	51	36.54			71.4348	63			36.3475	36.5808
43	2017-09-11	21:00:00	49	36.57			71.3913	60.8182			36.3629	36.5717
44	2017-09-11	21:30:00	73	36.65			68.1739	60.7273			36.3875	36.5717
45	2017-09-11	22:00:00	61	36.43			67.3478	60.75			36.4017	36.5625
46	2017-09-11	22:30:00	54	36.43			67.5652	55.3333			36.4158	36.5608
47	2017-09-11	23:00:00	52	36.43			67.913	53.5			36.43	36.5517
48	2017-09-11	23:30:00	50	36.45		62.0222	65	53		36.3471	36.4679	36.5258
49	2017-09-12	00:00:00	51	36.54		62.1333	62.3043	53.0833		36.3354	36.5004	36.5258
50	2017-09-12	00:30:00	55	36.43		62.3333	63.2174	53.4167		36.3215	36.5158	36.5258
51	2017-09-12	01:00:00	53	36.31		62.5111	60.8696	53.8333		36.3121	36.525	36.4975
52	2017-09-12	01:30:00	50	36.31		62.2222	59.8696	53.9167		36.3144	36.525	36.4692
53	2017-09-12	02:00:00	55	36.43		62.4889	59.6522	54.5		36.3075	36.525	36.46
54	2017-09-12	02:30:00	58	36.43		62.7778	58.8696	55.0833		36.2965	36.5158	36.4508
55	2017-09-12	03:00:00	58	36.43		63.3111	58.2174	55.8333		36.2877	36.5054	36.4392
56	2017-09-12	03:30:00	50	36.31		63.3111	57.1739	53.9167		36.2806	36.4912	36.4108
57	2017-09-12	04:00:00	46	36.31		62.9348	56.7083	52.6667		36.2956	36.4817	36.4008
58	2017-09-12	04:30:00	52	36.31		63.0652	53.9167	52.5		36.3142	36.4758	36.3908
59	2017-09-12	05:00:00	52	36.31		63.2391	53	52.5		36.3302	36.4662	36.3808
60	2017-09-12	05:30:00	30	36.2		62.9565	51.9167	50.8333		36.3302	36.4429	36.36
61	2017-09-12	06:00:00	46	36.31		63.2174	51.75	50.4167		36.3302	36.4333	36.3408
62	2017-09-12	06:30:00	66	36.4		63.913	52.375	51.3333		36.3296	36.4321	36.3383
63	2017-09-12	07:00:00		36.45		63.913	52.5652	51.1818		36.33	36.4237	36.35
64	2017-09-12	07:30:00	51	36.54		63.087	52.6522	51.2727		36.3508	36.4192	36.3692
65	2017-09-12	08:00:00	57	36.31		63.2391	53.0435	51.4545		36.3646	36.4096	36.3592
66	2017-09-12	08:30:00	45	36.2		62.1087	52.7826	50.2727		36.3715	36.3954	36.34
67	2017-09-12	09:00:00	70	35.98		62.5435	53.6957	51.3636		36.3669	36.3708	36.3025
68	2017-09-12	09:30:00	80	36.2		61.087	54	54.0909		36.3698	36.3521	36.2933
69	2017-09-12	10:00:00	54	36.43		60.5217	53.6957	54.8182		36.3769	36.3521	36.3033
70	2017-09-12	10:30:00	48	36.65		60.5	53.4348	54.4545		36.3885	36.3613	36.3317
71	2017-09-12	11:00:00	61	36.31		60.8696	53.8261	55.2727		36.3931	36.3562	36.3317
72	2017-09-12	11:30:00	80	36.31		60.0652	55.1304	59.8182		36.4092	36.3504	36.3408
73	2017-09-12	12:00:00	60	36.76		58.913	55.5217	61.0909		36.43	36.3596	36.3783
74	2017-09-12	12:30:00	47	36.87		59.1957	55.1739	59.3636		36.4469	36.3779	36.4175
75	2017-09-12	13:00:00	70	36.76		58.3913	55.913	60.25		36.4608	36.3967	36.4433
76	2017-09-12	13:30:00	53	37.1		57.9565	56.0435	60.4167		36.4773	36.4296	36.49
77	2017-09-12	14:00:00	74	37.21		58.2609	56.8696	61.8333		36.4935	36.4621	36.565
78	2017-09-12	14:30:00	54	37.1		57.7826	56.6957	62.5833		36.5029	36.49	36.64
79	2017-09-12	15:00:00	70	36.99		57.7174	57.2174	62.5833		36.5094	36.5133	36.7242
80	2017-09-12	15:30:00	66	36.99		57.5435	57.913	61.4167		36.5165	36.5417	36.79
81	2017-09-12	16:00:00	76	36.87		57.9362	59.2174	63.25		36.5233	36.565	36.8267
82	2017-09-12	16:30:00	64	36.87		56.766	59.7391	64.5833		36.5321	36.5883	36.845
83	2017-09-12	17:00:00	68	36.99		56.6383	60.4348	65.1667		36.5415	36.6167	36.9017
84	2017-09-12	17:30:00	85	36.99		57.2553	62.8261	65.5833		36.5462	36.6496	36.9583
85	2017-09-12	18:00:00	56	36.99		57.383	63.2609	65.25		36.5556	36.6779	36.9775
86	2017-09-12	18:30:00	54	37.1		57.4468	62.7391	65.8333		36.5696	36.7071	36.9967
87	2017-09-12	19:00:00	58	37.1		57.6596	62.5417	64.8333		36.579	36.7342	37.025
88	2017-09-12	19:30:00	57	37.1		57.8298	62.7917	65.1667		36.5883	36.7575	37.025
89	2017-09-12	20:00:00	56	37.1		58	62.75	63.6667		36.6	36.7904	37.0158
90	2017-09-12	20:30:00	60	37.1		58.1915	63.375	64.1667		36.6117	36.8279	37.0158
91	2017-09-12	21:00:00	59	36.99		58.4043	62.9167	63.25		36.6204	36.87	37.0158
92	2017-09-12	21:30:00		36.99		58.087	62.1739	63		36.6275	36.9029	37.0158
93	2017-09-12	22:00:00	56	36.99		57.9783	62.2609	61.1818		36.6392	36.9263	37.0258
94	2017-09-12	22:30:00	56	36.99		58.0217	62.6087	60.4545		36.6508	36.9404	37.0358
95	2017-09-12	23:00:00	53	36.99		58.0435	62.2609	59.0909		36.6625	36.9688	37.0358
96	2017-09-12	23:30:00	56	36.99		58.1739	61.2174	56.4545		36.6737	36.9971	37.0358
97	2017-09-13	00:00:00	57	36.99		58.3043	61.087	56.5455		36.6831	37.0067	37.0358
98	2017-09-13	00:30:00	55	37.1		58.3043	61.4348	56.6364		36.6971	37.0163	37.0358
99	2017-09-13	01:00:00	58	37.1		58.413	60.913	56.6364		36.7135	37.0304	37.0358
100	2017-09-13	01:30:00	57	36.99		58.5652	61.087	56.6364		36.7277	37.0258	37.0267
101	2017-09-13	02:00:00	55	36.99		58.5652	60.2609	56.5455		36.7394	37.0167	37.0175
102	2017-09-13	02:30:00	57	36.99		58.5435	60.3913	56.2727		36.751	37.0121	37.0083
103	2017-09-13	03:00:00	55	36.99		58.4783	59.7391	55.9091		36.7627	37.0121	37.0083
104	2017-09-13	03:30:00	71	36.99		58.9348	59.9565	57.1667		36.7769	37.0121	37.0083
105	2017-09-13	04:00:00	60	36.99		59.2391	59.2609	57.5		36.791	37.0171	37.0083
106	2017-09-13	04:30:00	57	36.96		59.3478	58.9565	57.5833		36.8046	37.0208	37.0058
107	2017-09-13	05:00:00	56	36.87		59.4348	58.4348	57.8333		36.8162	37.0158	36.9958
108	2017-09-13	05:30:00	55	36.76		59.9783	57.1304	57.75		36.8279	37.0063	36.9767
109	2017-09-13	06:00:00	75	36.87		60.6087	57.9565	59.25		36.8396	37.0013	36.9667
110	2017-09-13	06:30:00	51	36.76		60.2826	57.8261	58.9167		36.8471	36.9871	36.9383
111	2017-09-13	07:00:00	57	36.76		60.2128	57.7826	58.8333		36.8535	36.9729	36.91
112	2017-09-13	07:30:00		36.87		60.413	57.8182	59		36.8604	36.9633	36.9
113	2017-09-13	08:00:00	46	36.99		60.1739	57.3636	58.1818		36.8746	36.9588	36.9
114	2017-09-13	08:30:00		36.87		60.5111	57.2381	58.3		36.8885	36.9492	36.89
115	2017-09-13	09:00:00	79	36.57		60.7111	58.1905	60.7		36.9008	36.9317	36.855
116	2017-09-13	09:30:00	83	36.65		60.7778	59.3182	61.9		36.9102	36.9175	36.8267
117	2017-09-13	10:00:00		36.76		60.9318	59.4762	62.1111		36.9171	36.9079	36.8075
118	2017-09-13	10:30:00	122	36.87		62.6136	62.619	69.3333		36.9217	36.9029	36.8
119	2017-09-13	11:00:00	68	36.99		62.7727	63.3333	70.6667		36.9358	36.9029	36.81
120	2017-09-13	11:30:00	72	37.1		62.5909	64.0952	72.5556		36.9523	36.9075	36.8383
121	2017-09-13	12:00:00	57	36.99		62.5227	64.0952	70.5556		36.9571	36.9075	36.8483
122	2017-09-13	12:30:00	57	36.87		62.75	64.1905	71.2222		36.9571	36.8979	36.8575
123	2017-09-13	13:00:00	74	36.87		62.8409	64.9524	73.1111		36.9594	36.8883	36.8667
124	2017-09-13	13:30:00	60	36.99		63	65.0952	71.8		36.9571	36.8883	36.8767
125	2017-09-13	14:00:00	61	37.1		62.7045	65.381	73.3		36.9548	36.8929	36.8858
126	2017-09-13	14:30:00	78	37.1		63.25	66.381	73.7273		36.9548	36.8975	36.905
127	2017-09-13	15:00:00	69	36.99		63.2273	67.0476	72.8182		36.9548	36.8975	36.94
128	2017-09-13	15:30:00	72	36.99		63.3636	67.0952	71.8182		36.9548	36.8975	36.9683
129	2017-09-13	16:00:00	88	36.99		63.6364	68.4286	73.1667		36.9573	36.8975	36.9875
130	2017-09-13	16:30:00	84	37.1		64.0909	69.7143	70		36.9621	36.9033	37.0067
131	2017-09-13	17:00:00	48	37.1		63.6364	69.3333	68.3333		36.9644	36.9129	37.0158
132	2017-09-13	17:30:00	87	37.1		63.6818	70.8571	69.5833		36.9667	36.9271	37.0158
133	2017-09-13	18:00:00	71	37.21		64.0227	70.6667	70.75		36.9712	36.9413	37.0342
134	2017-09-13	18:30:00	68	37.33		64.3409	71.4762	71.6667		36.976	36.965	37.0725
135	2017-09-13	19:00:00	62	37.21		64.4318	71.7143	70.6667		36.9783	36.9838	37.1008
136	2017-09-13	19:30:00	64	37.21		64.5909	71.3636	71		36.9806	36.9979	37.1192
137	2017-09-13	20:00:00	70	37.21		64.9091	72.4545	71.75		36.9829	37.0071	37.1283
138	2017-09-13	20:30:00	68	37.1		65.0909	72.2609	70.9167		36.9829	37.0167	37.1283
139	2017-09-13	21:00:00	66	36.99		65.25	71.6957	70.6667		36.9829	37.0342	37.1283
140	2017-09-13	21:30:00	65	37.1		65.2444	70.913	70.0833		36.9852	37.0529	37.1375
141	2017-09-13	22:00:00	60	37.1		65.3333	70.4583	67.75		36.9875	37.0671	37.1467
142	2017-09-13	22:30:00	56	37.1		65.3333	67.7083	65.4167		36.9898	37.0767	37.1467
143	2017-09-13	23:00:00	64	36.99		65.5778	67.5417	66.75		36.9898	37.0767	37.1375
144	2017-09-13	23:30:00	57	36.99		65.6	66.9167	64.25		36.9898	37.0721	37.1283
145	2017-09-14	00:00:00	61	36.99		65.6889	67.0833	63.4167		36.9898	37.0721	37.11
146	2017-09-14	00:30:00	65	36.99		65.9111	67.4167	63.1667		36.9875	37.0771	37.0817
147	2017-09-14	01:00:00	63	36.87		66.0222	66.9583	63.25		36.9827	37.0771	37.0533
148	2017-09-14	01:30:00	60	36.87		66.0889	66.9583	62.9167		36.9802	37.0721	37.025
149	2017-09-14	02:00:00	66	36.87		66.3333	67.1667	62.5833		36.9777	37.0625	36.9967
150	2017-09-14	02:30:00	64	36.99		66.4889	66.5833	62.25		36.9777	37.0579	36.9875
151	2017-09-14	03:00:00		36.99		66.75	66.4783	61.9091		36.9777	37.0579	36.9875
152	2017-09-14	03:30:00	60	36.99		66.5	65.9565	61.4545		36.9777	37.0579	36.9783
153	2017-09-14	04:00:00	53	36.87		66.3409	64.4348	60.8182		36.9752	37.0529	36.9592
154	2017-09-14	04:30:00	58	36.71		66.3636	63.3043	61		36.97	37.0367	36.9267
155	2017-09-14	05:00:00	46	36.54		66.1364	63.2174	59.3636		36.9631	37.0133	36.8892
156	2017-09-14	05:30:00	45	36.43		65.9091	61.3913	58.2727		36.9562	36.9854	36.8425
157	2017-09-14	06:00:00	60	36.31		65.5682	60.913	58.1818		36.9446	36.9479	36.7858
158	2017-09-14	06:30:00	70	36.31		66	61	58.6364		36.9352	36.9054	36.7292
159	2017-09-14	07:00:00	80	36.43		66.5227	61.7826	60.1818		36.9283	36.8729	36.6925
160	2017-09-14	07:30:00	92	36.54		67.0889	63	63.0909		36.9215	36.845	36.665
161	2017-09-14	08:00:00	79	36.43		67.8222	63.3913	64.2727		36.9098	36.8125	36.6283
162	2017-09-14	08:30:00	69	36.43		67.8478	63.4348	64.7273		36.9006	36.7846	36.5817
163	2017-09-14	09:00:00	81	36.54		67.8913	64.087	66.0833		36.9	36.7658	36.5442
164	2017-09-14	09:30:00	78	36.54		67.7826	64.6522	67.5833		36.8977	36.7425	36.5067
165	2017-09-14	10:00:00	88	36.65		68.2128	65.8696	70.5		36.8954	36.7237	36.4883
166	2017-09-14	10:30:00	57	36.54		66.8298	65.913	70.4167		36.8885	36.7004	36.4742
167	2017-09-14	11:00:00	78	36.65		67.0426	66.5217	73.0833		36.8815	36.6862	36.4833
168	2017-09-14	11:30:00	76	36.76		67.1277	67.3478	75.6667		36.8744	36.6767	36.5108
169	2017-09-14	12:00:00	67	36.76		67.3404	67.6087	76.25		36.8696	36.6671	36.5483
170	2017-09-14	12:30:00	77	36.87		67.766	68.1304	76.8333		36.8696	36.6621	36.595
171	2017-09-14	13:00:00	75	36.99		67.7872	68.6522	76.4167		36.8721	36.6671	36.6417
172	2017-09-14	13:30:00	86	37.1		68.3404	69.7826	75.9167		36.8744	36.6767	36.6883
173	2017-09-14	14:00:00	94	37.1		69.0426	71	77.1667		36.8744	36.6862	36.7442
174	2017-09-14	14:30:00	97	37.21		69.4468	72.4348	79.5		36.8767	36.6954	36.8092
175	2017-09-14	15:00:00	187	37.33		71.9574	77.2083	88.3333		36.8837	36.7096	36.875
176	2017-09-14	15:30:00	83	37.21		72.1915	78.1667	88.75		36.8883	36.7188	36.9308
177	2017-09-14	16:00:00		37.55		71.8478	79.2609	88.8182		36.9	36.7471	37.0058
178	2017-09-14	16:30:00	125	37.33		72.7391	82.1739	95		36.9048	36.7729	37.0717
179	2017-09-14	17:00:00	119	36.87		74.2826	85.3478	98.7273		36.9	36.7867	37.09
180	2017-09-14	17:30:00	88	37.21		74.3043	87.2174	99.8182		36.9023	36.8192	37.1275
181	2017-09-14	18:00:00	122	37.44		75.413	89.913	104.818		36.9071	36.8663	37.1842
182	2017-09-14	18:30:00	97	37.55		76.0435	91.087	106.636		36.9117	36.9179	37.2408
183	2017-09-14	19:00:00	80	37.67		76.4348	91.087	107.091		36.9212	36.9696	37.2975
184	2017-09-14	19:30:00	96	37.55		77.1304	91.2609	108		36.9283	37.0117	37.335
185	2017-09-14	20:00:00	89	37.55		77.5435	91.6957	107.545		36.9354	37.0583	37.3725
186	2017-09-14	20:30:00	86	37.55		77.9348	92.4348	106.545		36.9448	37.105	37.4008
187	2017-09-14	21:00:00	70	37.44		78.0217	91.9565	95.9091		36.9542	37.1425	37.41
188	2017-09-14	21:30:00	66	37.33		78.0435	91.4348	94.3636		36.959	37.1754	37.42
189	2017-09-14	22:00:00	197	37.33		81.0217	96.1739	102.917		36.9637	37.2037	37.4017
190	2017-09-14	22:30:00	85	37.21		81.6522	97.3913	99.5833		36.966	37.2317	37.3917
191	2017-09-14	23:00:00	86	37.33		82.1304	97.7391	96.8333		36.9731	37.26	37.43
192	2017-09-14	23:30:00	60	37.33		82.1957	97.0435	94.5		36.9802	37.2837	37.44
193	2017-09-15	00:00:00	64	37.44		82.2609	96.913	89.6667		36.9896	37.3121	37.44
194	2017-09-15	00:30:00	63	37.33		82.2174	96.3043	86.8333		36.9967	37.3313	37.4217
195	2017-09-15	01:00:00	60	37.21		82.1522	95.6522	85.1667		37.0037	37.3404	37.3833
196	2017-09-15	01:30:00	60	37.33		82.1522	94.5217	82.1667		37.0133	37.35	37.365
197	2017-09-15	02:00:00	60	37.33		82.0217	93.0435	79.75		37.0229	37.3596	37.3467
198	2017-09-15	02:30:00	60	37.33		81.9348	91.4348	77.5833		37.03	37.3646	37.3283
199	2017-09-15	03:00:00	54	37.21		81.3404	85.6522	76.25		37.0346	37.3596	37.3092
200	2017-09-15	03:30:00	57	37.1		81.2766	84.5217	75.5		37.0369	37.355	37.29
201	2017-09-15	04:00:00	62	36.99		81.4681	83.5833	64.25		37.0394	37.3317	37.2617
202	2017-09-15	04:30:00	74	36.87		81.8085	81.4583	63.3333		37.0427	37.3125	37.2333
203	2017-09-15	05:00:00	59	36.87		82.0851	78.9583	61.0833		37.0496	37.3125	37.195
204	2017-09-15	05:30:00	58	36.76		82.3617	77.7083	60.9167		37.0565	37.2938	37.1475
205	2017-09-15	06:00:00	49	36.87		82.1277	74.6667	59.6667		37.0681	37.27	37.1
206	2017-09-15	06:30:00	83	36.65		82.4043	74.0833	61.3333		37.0752	37.2325	37.0433
207	2017-09-15	07:00:00	70	36.65		82.1915	73.6667	62.1667		37.0798	37.19	36.9967
208	2017-09-15	07:30:00	100	36.99		82.3617	73.8333	65.5		37.0892	37.1667	36.9683
209	2017-09-15	08:00:00	98	37.1		82.766	74.2083	68.6667		37.1031	37.1479	36.9492
210	2017-09-15	08:30:00	57	36.99		82.5106	73	68.4167		37.1148	37.1246	36.9208
211	2017-09-15	09:00:00	49	36.65		81.8298	72.125	68		37.1171	37.0917	36.8742
212	2017-09-15	09:30:00	79	36.65		81.8511	72.6667	69.8333		37.1194	37.0633	36.8367
213	2017-09-15	10:00:00	117	36.54		82.4681	69.3333	74.4167		37.1171	37.0304	36.7992
214	2017-09-15	10:30:00	125	36.2		83.9149	71	78.6667		37.11	36.9883	36.7433
215	2017-09-15	11:00:00	93	36.87		84.234	71.2917	81.5		37.1146	36.9692	36.7433
216	2017-09-15	11:30:00	108	37.21		84.9149	73.2917	85.6667		37.124	36.9642	36.7808
217	2017-09-15	12:00:00	74	36.57		85.0638	73.7083	87.75		37.12	36.9279	36.7558
218	2017-09-15	12:30:00	66	36.31		84.8298	73.8333	86.3333		37.1083	36.8854	36.7275
219	2017-09-15	13:00:00	94	36.4		85.234	75.25	88.3333		37.096	36.8517	36.7067
220	2017-09-15	13:30:00	170	37.21		87.0213	79.8333	94.1667		37.0983	36.8467	36.725
221	2017-09-15	14:00:00	56	37.3		86.2128	79.6667	90.6667		37.1025	36.8454	36.7417
222	2017-09-15	14:30:00	63	37.1		85.4894	79.7917	91.1667		37.1002	36.8358	36.7508
223	2017-09-15	15:00:00	97	37.21		83.5745	81.5833	95.1667		37.0977	36.8358	36.7975
224	2017-09-15	15:30:00	98	36.31		83.8936	83.2917	96.75		37.079	36.8029	36.7692
225	2017-09-15	16:00:00	89	36.87		84	84.4167	94.4167		37.0648	36.7979	36.7967
226	2017-09-15	16:30:00	93	36.99		83.3333	85.2083	91.75		37.0577	36.8029	36.8625
227	2017-09-15	17:00:00	85	37.55		82.625	86.2917	91.0833		37.0719	36.8312	36.9192
228	2017-09-15	17:30:00	93	37.24		82.7292	87.75	89.8333		37.0725	36.8513	36.9217
229	2017-09-15	18:00:00	93	37.33		82.125	89.5833	91.4167		37.0702	36.8704	36.985
230	2017-09-15	18:30:00	84	37.33		81.8542	89.625	92.9167		37.0656	36.8987	37.07
231	2017-09-15	19:00:00	70	37.21		81.6458	89.625	90.9167		37.056	36.9221	37.1375
232	2017-09-15	19:30:00	64	37.1		80.9792	88.125	82.0833		37.0467	36.9267	37.1283
233	2017-09-15	20:00:00	75	37.1		80.6875	87.1667	83.6667		37.0373	36.9267	37.1117
234	2017-09-15	20:30:00	76	37.07		80.4792	87.9583	84.75		37.0273	36.93	37.1092
235	2017-09-15	21:00:00	87	36.99		80.8333	89.5417	83.9167		37.0179	36.9442	37.0908
236	2017-09-15	21:30:00	69	37.04		80.8958	89.125	81.5		37.0119	36.9604	37.1517
237	2017-09-15	22:00:00	70	37.1		78.25	87.1667	79.9167		37.0071	36.9838	37.1708
238	2017-09-15	22:30:00	70	37.1		77.9375	84.875	78		37.0048	37.0213	37.18
239	2017-09-15	23:00:00	69	36.99		77.5833	83.875	76.6667		36.9977	37.0263	37.1333
240	2017-09-15	23:30:00	65	36.99		77.6875	82.0833	74.3333		36.9906	37.0171	37.1125
241	2017-09-16	00:00:00	64	36.87		77.6875	81.6667	71.9167		36.9787	37.0296	37.0742
242	2017-09-16	00:30:00	65	36.76		77.7292	81.625	70.3333		36.9669	37.0483	37.0267
243	2017-09-16	01:00:00	61	36.76		77.75	80.25	69.5833		36.9575	37.0633	36.9892
244	2017-09-16	01:30:00	58	36.76		77.7083	75.5833	69.0833		36.9456	37.0446	36.9608
245	2017-09-16	02:00:00	55	36.65		77.6042	75.5417	67.4167		36.9315	37.0175	36.9233
246	2017-09-16	02:30:00	67	36.76		77.75	75.7083	66.6667		36.9196	37.0033	36.8975
247	2017-09-16	03:00:00	65	36.87		77.9792	74.375	64.8333		36.9125	36.9892	36.8875
248	2017-09-16	03:30:00	63	36.99		78.1042	72.9167	64.3333		36.9102	37.0175	36.8833
249	2017-09-16	04:00:00	66	37.1		78.1875	71.9583	64		36.9125	37.0271	36.8833
250	2017-09-16	04:30:00	69	37.1		78.0833	70.9583	63.9167		36.9173	37.0317	36.8833
251	2017-09-16	05:00:00	60	37.1		78.1042	69.9167	63.1667		36.9221	37.0129	36.8925
252	2017-09-16	05:30:00	61	37.02		78.1667	68.5833	62.8333		36.9275	37.0038	36.895
253	2017-09-16	06:00:00	67	36.99		78.5417	67.5	63.0833		36.93	36.9896	36.905
254	2017-09-16	06:30:00	55	36.87		77.9583	66.2917	62.25		36.9346	36.9704	36.9142
255	2017-09-16	07:00:00	60	36.76		77.75	65.875	62.1667		36.9369	36.9517	36.9142
256	2017-09-16	07:30:00	63	36.65		76.9792	65.8333	62.5833		36.9298	36.9329	36.905
257	2017-09-16	08:00:00	64	36.65		76.2708	65.375	63.3333		36.9204	36.9142	36.905
258	2017-09-16	08:30:00	78	36.99		76.7083	65.4583	64.25		36.9204	36.9108	36.9242
259	2017-09-16	09:00:00	69	37.21		77.125	64.7083	64.5833		36.9321	36.92	36.9525
260	2017-09-16	09:30:00	64	36.99		76.8125	64.5	64.6667		36.9392	36.9179	36.9525
261	2017-09-16	10:00:00	78	36.43		76	64.8333	65.6667		36.9369	36.89	36.8967
262	2017-09-16	10:30:00	115	36.87		75.7917	66.7083	69.5		36.9508	36.8804	36.8775
263	2017-09-16	11:00:00	117	36.96		76.2917	68.7083	74.25		36.9527	36.8792	36.8658
264	2017-09-16	11:30:00	98	36.99		76.0833	70.0833	77.3333		36.9481	36.8792	36.8633
265	2017-09-16	12:00:00	85	36.43		76.3125	70.9583	78.8333		36.9452	36.8608	36.8167
266	2017-09-16	12:30:00	82	36.2		76.6458	71.6667	81.0833		36.9429	36.8375	36.7608
267	2017-09-16	13:00:00	82	36.65		76.3958	72.5417	82.9167		36.9481	36.8329	36.7517
268	2017-09-16	13:30:00	75	37.1		74.4167	73.25	83.9167		36.9458	36.8471	36.7892
269	2017-09-16	14:00:00	63	36.87		74.5625	73.5833	83.8333		36.9369	36.8562	36.8075
270	2017-09-16	14:30:00	66	37.21		74.625	73.5417	82.8333		36.9392	36.875	36.8258
271	2017-09-16	15:00:00	84	36.65		74.3542	74.3333	84.0833		36.9275	36.8658	36.7792
272	2017-09-16	15:30:00	86	36.87		74.1042	75.2917	85.9167		36.9392	36.8608	36.7692
273	2017-09-16	16:00:00	63	37.1		73.5625	75.1667	84.6667		36.944	36.8608	36.825
274	2017-09-16	16:30:00	94	37.33		73.5833	76.2083	82.9167		36.951	36.8704	36.8633
275	2017-09-16	17:00:00	86	37.55		73.6042	77.2917	80.3333		36.951	36.8892	36.9125
276	2017-09-16	17:30:00	81	37.44		73.3542	78.125	78.9167		36.9552	36.9067	36.95
277	2017-09-16	18:00:00	86	37.33		73.2083	78.9167	79		36.9552	36.9208	37.025
278	2017-09-16	18:30:00	77	37.21		73.0625	79.8333	78.5833		36.9527	36.935	37.1092
279	2017-09-16	19:00:00	66	37.1		72.9792	80.0833	77.25		36.9504	36.9492	37.1467
280	2017-09-16	19:30:00	68	36.99		73.0625	80.2917	76.6667		36.9481	36.9633	37.1375
281	2017-09-16	20:00:00	67	36.99		72.8958	80.4167	77		36.9458	36.9775	37.1475
282	2017-09-16	20:30:00	70	36.87		72.7708	80.0833	77.3333		36.9417	36.9725	37.1192
283	2017-09-16	21:00:00	75	36.99		72.5208	80.3333	76.5833		36.9417	36.9633	37.1475
284	2017-09-16	21:30:00	64	36.87		72.4167	80.3333	74.75		36.9381	36.9583	37.1475
285	2017-09-16	22:00:00	83	36.87		72.6875	80.5417	76.4167		36.9333	36.9767	37.1283
286	2017-09-16	22:30:00	68	36.87		72.6458	78.5833	74.25		36.9285	36.9767	37.09
287	2017-09-16	23:00:00	77	36.87		72.8125	76.9167	73.5		36.926	36.9729	37.0333
288	2017-09-16	23:30:00	63	36.76		72.7708	75.4583	72		36.9212	36.9633	36.9767
289	2017-09-17	00:00:00	70	36.76		72.8958	74.8333	70.6667		36.919	36.9771	36.9292
290	2017-09-17	00:30:00	60	36.87		72.7917	73.9167	69.25		36.9212	37.005	36.9008
291	2017-09-17	01:00:00	59	36.76		72.75	72.9583	68.6667		36.9212	37.0096	36.8725
292	2017-09-17	01:30:00	64	36.65		72.875	72.5	68.3333		36.919	36.9908	36.8442
293	2017-09-17	02:00:00	58	36.54		72.9375	72.2917	67.5833		36.9167	36.9771	36.8067
294	2017-09-17	02:30:00	57	36.45		72.7292	71.9167	66.5		36.9102	36.9454	36.7717
295	2017-09-17	03:00:00	61	36.54		72.6458	70.9583	65.3333		36.9033	36.9408	36.7342
296	2017-09-17	03:30:00	59	36.43		72.5625	69.8333	64.9167		36.8917	36.9225	36.6975
297	2017-09-17	04:00:00	64	36.43		72.5208	69.875	63.3333		36.8777	36.8946	36.6608
298	2017-09-17	04:30:00	56	36.31		72.25	68.2917	62.3333		36.8612	36.8521	36.6142
299	2017-09-17	05:00:00	60	36.43		72.25	67.2083	60.9167		36.8473	36.8054	36.5775
300	2017-09-17	05:30:00	57	36.54		72.1667	66.2083	60.4167		36.8373	36.7679	36.5592
301	2017-09-17	06:00:00	64	36.65		72.1042	65.2917	59.9167		36.8302	36.7396	36.55
302	2017-09-17	06:30:00	62	36.65		72.25	64.6667	60.0833		36.8256	36.7162	36.5317
303	2017-09-17	07:00:00	52	36.68		72.0833	64.0833	59.5		36.824	36.6987	36.525
304	2017-09-17	07:30:00	52	36.54		71.8542	63.4167	58.5		36.8217	36.68	36.5158
305	2017-09-17	08:00:00	61	36.54		71.7917	63.1667	58.75		36.8194	36.6612	36.5158
306	2017-09-17	08:30:00	42	36.54		71.0417	62	57.5		36.81	36.6475	36.5233
307	2017-09-17	09:00:00	72	36.87		71.1042	61.875	58.4167		36.8029	36.6425	36.5508
308	2017-09-17	09:30:00	68	36.99		71.1875	62.0417	59.1667		36.8029	36.6475	36.5975
309	2017-09-17	10:00:00	129	37.1		72.25	63.9583	64.5833		36.8169	36.6571	36.6533
310	2017-09-17	10:30:00	86	37.1		71.6458	64.7083	67.0833		36.8217	36.6667	36.7192
311	2017-09-17	11:00:00	51	37.1		70.2708	63.625	66.3333		36.8246	36.6762	36.775
312	2017-09-17	11:30:00	72	37.21		69.7292	64	67.5833		36.8292	36.695	36.8308
313	2017-09-17	12:00:00	66	37.1		69.3333	63.8333	67.75		36.8431	36.7092	36.8683
314	2017-09-17	12:30:00	78	36.99		69.25	64.5833	69.0833		36.8596	36.7142	36.8967
315	2017-09-17	13:00:00	66	36.87		68.9167	64.875	70.25		36.8642	36.7188	36.9125
316	2017-09-17	13:30:00	93	36.76		69.2917	66.0833	73.6667		36.8571	36.7233	36.9308
317	2017-09-17	14:00:00	81	36.99		69.6667	67.0417	75.3333		36.8596	36.7421	36.9683
318	2017-09-17	14:30:00	78	37.1		69.9167	67.9167	78.3333		36.8573	36.7692	37.015
319	2017-09-17	15:00:00	82	37.1		69.875	68.7917	79.1667		36.8667	36.7925	37.0342
320	2017-09-17	15:30:00	61	36.99		69.3542	68.875	78.5833		36.8692	36.8158	37.0342
321	2017-09-17	16:00:00	92	36.87		69.9583	70.0417	75.5		36.8644	36.8342	37.015
322	2017-09-17	16:30:00	93	36.99		69.9375	71.5833	76.0833		36.8573	36.8625	37.0058
323	2017-09-17	17:00:00	92	37.21		70.0625	72.9167	79.5		36.8502	36.895	37.015
324	2017-09-17	17:30:00	65	37.21		69.7292	73.25	78.9167		36.8454	36.9229	37.015
325	2017-09-17	18:00:00	55	37.21		69.0833	72.875	78		36.8429	36.9463	37.0242
326	2017-09-17	18:30:00	75	37.07		69.0417	73.4167	77.75		36.84	36.9638	37.0308
327	2017-09-17	19:00:00		37.1		69.1064	74.3478	78.8182		36.84	36.9813	37.05
328	2017-09-17	19:30:00		36.99		69.1304	75.3636	77.4		36.84	37	37.0692
329	2017-09-17	20:00:00		36.87		69.1778	76.0476	77		36.8375	37.0138	37.0592
330	2017-09-17	20:30:00	78	36.76		69.3556	77.7619	77		36.8352	37.0229	37.0308
331	2017-09-17	21:00:00	47	36.76		68.7333	76.5714	73.1111		36.8304	37.0183	37.0025
332	2017-09-17	21:30:00		36.65		68.8409	77	74.625		36.8258	37.0042	36.9742
333	2017-09-17	22:00:00	73	36.65		68.6136	74.2	72.25		36.8212	36.9854	36.9558
334	2017-09-17	22:30:00	52	36.76		68.25	72.5	67.125		36.819	36.9713	36.9367
335	2017-09-17	23:00:00	48	36.87		67.5909	72.35	61.625		36.819	36.9617	36.9083
336	2017-09-17	23:30:00	52	36.79		67.3409	71.35	60		36.8196	36.9442	36.8733
337	2017-09-18	00:00:00	50	36.87		66.8864	70.55	59.375		36.8219	36.9346	36.845
338	2017-09-18	00:30:00	47	36.76		66.5909	69	55.875		36.8196	36.925	36.8192
339	2017-09-18	01:00:00	60	36.76		66.6136	68.7	56.3333		36.8196	36.9204	36.7908
340	2017-09-18	01:30:00	42	36.65		66.1136	66.15	54.9		36.8196	36.9158	36.7625
341	2017-09-18	02:00:00	40	36.54		65.7045	64.1	53.5455		36.8196	36.8971	36.735
342	2017-09-18	02:30:00	44	36.54		65.4091	62.4	50.4545		36.8215	36.8737	36.7167
343	2017-09-18	03:00:00	48	36.43		65.1136	60.7	50.5455		36.8192	36.8458	36.6892
344	2017-09-18	03:30:00	45	36.31		64.7955	59.9	50.0833		36.8167	36.8175	36.6608
345	2017-09-18	04:00:00	57	36.2		64.6364	58.15	48.75		36.8119	36.7896	36.6233
346	2017-09-18	04:30:00	53	36.31		64.5682	56.15	48.8333		36.8119	36.7612	36.5858
347	2017-09-18	05:00:00	46	36.2		64.25	53.85	48.6667		36.8071	36.7192	36.53
348	2017-09-18	05:30:00	56	36.15		64.2273	53.4	49		36.799	36.675	36.4767
349	2017-09-18	06:00:00	69	35.98		64.3409	54.1	50.5833		36.785	36.6237	36.4025
350	2017-09-18	06:30:00	70	35.98		64.5227	53.85	52.5		36.771	36.5783	36.3375
351	2017-09-18	07:00:00	65	35.98		64.8182	54.381	52.9167		36.7565	36.5317	36.2725
352	2017-09-18	07:30:00	52	35.98		64.8182	54.2727	53.75		36.7448	36.4896	36.2167
353	2017-09-18	08:00:00	56	35.98		64.7045	54.3478	55.0833		36.7331	36.4525	36.17
354	2017-09-18	08:30:00	43	35.98		64.7273	52.8261	55		36.7215	36.42	36.1233
355	2017-09-18	09:00:00	83	35.87		64.9773	54.3913	57.9167		36.7006	36.3829	36.0767
356	2017-09-18	09:30:00	90	36.43		65.4773	55.875	61.6667		36.689	36.3738	36.0867
357	2017-09-18	10:00:00	64	36.65		64	55.5	62.25		36.6796	36.3738	36.1242
358	2017-09-18	10:30:00	192	36.76		66.4091	61.3333	73.8333		36.6725	36.3738	36.1617
359	2017-09-18	11:00:00	90	36.82		67.2955	63.0833	77.5		36.6667	36.3717	36.2133
360	2017-09-18	11:30:00	93	36.87		67.7727	64.7917	80.5833		36.6596	36.375	36.2733
361	2017-09-18	12:00:00	81	36.87		68.1136	66.0833	81.5833		36.6548	36.375	36.3475
362	2017-09-18	12:30:00	72	36.99		67.9773	67.125	81.75		36.6548	36.3846	36.4317
363	2017-09-18	13:00:00	66	36.87		67.9773	67.375	81.8333		36.6548	36.3892	36.5058
364	2017-09-18	13:30:00	78	36.85		67.6364	68.875	84		36.6567	36.3975	36.5783
365	2017-09-18	14:00:00	63	36.87		67.2273	69.8333	84.5833		36.6542	36.4113	36.6525
366	2017-09-18	14:30:00	82	36.65		67.3182	71.4167	87.8333		36.6448	36.4158	36.7083
367	2017-09-18	15:00:00	71	36.76		67.0682	72.375	86.8333		36.6377	36.4296	36.7825
368	2017-09-18	15:30:00	65	36.76		67.1591	73.2083	84.75		36.6329	36.4483	36.81
369	2017-09-18	16:00:00	88	36.99		67.0682	74.5	86.75		36.6354	36.4812	36.8383
370	2017-09-18	16:30:00	75	37.1		66.6591	75.4167	77		36.6377	36.5142	36.8667
371	2017-09-18	17:00:00	75	37.1		66.2727	76.625	75.75		36.6354	36.5517	36.89
372	2017-09-18	17:30:00	91	37.1		66.8636	78.0833	75.5833		36.6331	36.5912	36.9092
373	2017-09-18	18:00:00	83	37.1		67.5	78.6667	75.75		36.6308	36.6379	36.9283
374	2017-09-18	18:30:00	78	37.16		67.5682	79	76.25		36.6327	36.6871	36.9425
375	2017-09-18	19:00:00	75	37.21		67.7333	79.4167	77		36.635	36.7383	36.9708
376	2017-09-18	19:30:00	81	37.21		68.0217	80.625	77.25		36.6396	36.7896	37.0008
377	2017-09-18	20:00:00	74	37.1		68.1489	81.375	78.1667		36.6444	36.8363	37.02
378	2017-09-18	20:30:00		37.21		67.9348	83.0435	77.8182		36.6537	36.8875	37.0667
379	2017-09-18	21:00:00		37.16		68.4	83.0455	78.5		36.6621	36.9413	37.1
380	2017-09-18	21:30:00		37.21		68.4	82.7143	80		36.6737	36.9738	37.1375
381	2017-09-18	22:00:00	72	37.21		68.3778	83.0952	78.2222		36.6854	36.9971	37.1558
382	2017-09-18	22:30:00	70	37.1		68.7778	77.2857	77.6667		36.6925	37.0113	37.1558
383	2017-09-18	23:00:00	70	36.87		69.2667	76.3333	77.1111		36.6925	37.0133	37.1367
384	2017-09-18	23:30:00	60	36.76		69.4444	74.7619	73.6667		36.6919	37.0088	37.1083
385	2017-09-19	00:00:00	58	36.76		69.6222	73.6667	70.8889		36.6896	37.0042	37.08
386	2017-09-19	00:30:00	56	36.65		69.8222	72.9048	68.4444		36.6873	36.99	37.0375
387	2017-09-19	01:00:00	52	36.54		69.6444	72.2381	65.8889		36.6827	36.9763	36.9817
388	2017-09-19	01:30:00		36.43		70.2727	71.95	64		36.6781	36.9588	36.9167
389	2017-09-19	02:00:00	53	36.43		70.5682	71.45	61.375		36.6758	36.9404	36.8608
390	2017-09-19	02:30:00	52	36.51		70.75	69.95	60.3333		36.6752	36.9346	36.8025
391	2017-09-19	03:00:00	51	36.54		70.8182	68.95	59.4		36.6775	36.9254	36.7508
392	2017-09-19	03:30:00	57	36.54		71.0909	68.55	59.1818		36.6823	36.9162	36.695
393	2017-09-19	04:00:00	55	36.54		71.0455	66.9	57.6364		36.6894	36.8975	36.6392
394	2017-09-19	04:30:00	52	36.54		71.0227	65.75	56		36.6942	36.8742	36.5925
395	2017-09-19	05:00:00	55	36.43		71.2273	64.75	54.6364		36.699	36.8462	36.5558
396	2017-09-19	05:30:00	62	36.31		71.3636	63.3	54.8182		36.7023	36.8133	36.5183
397	2017-09-19	06:00:00	53	36.2		71	61.8	54.3636		36.7069	36.7758	36.4717
398	2017-09-19	06:30:00	59	36.31		70.75	60.85	54.6364		36.7137	36.7404	36.4433
399	2017-09-19	07:00:00	58	36.31		70.5909	60	55.1818		36.7206	36.7029	36.4242
400	2017-09-19	07:30:00	111	36.09		71.9318	61.5	59.8333		36.7229	36.6562	36.3958
401	2017-09-19	08:00:00	50	36.31		71.7955	60.3	59.5833		36.7298	36.6233	36.3858
402	2017-09-19	08:30:00	50	36.43		71.9545	59.8095	59.4167		36.7392	36.5908	36.3792
403	2017-09-19	09:00:00	107	36.54		72.5	61.9545	64.0833		36.7531	36.565	36.3792
404	2017-09-19	09:30:00		36.54		72.093	61.9545	64.7273		36.7554	36.5371	36.3792
405	2017-09-19	10:00:00	49	36.65		71.7442	60.9091	64.1818		36.7554	36.5137	36.3883
406	2017-09-19	10:30:00	75	36.65		69.0233	61.1364	66.2727		36.7531	36.495	36.3975
407	2017-09-19	11:00:00	68	36.43		68.5116	61.0455	67.4545		36.745	36.4767	36.3975
408	2017-09-19	11:30:00	48	36.43		67.4651	60.5	66.1818		36.7358	36.4629	36.4075
409	2017-09-19	12:00:00	76	36.65		67.3488	61.3182	68.2727		36.7313	36.4583	36.445
410	2017-09-19	12:30:00	84	36.76		67.6279	62.5909	70.5455		36.7265	36.4629	36.4825
411	2017-09-19	13:00:00	69	36.76		67.6977	63.3636	71.5455		36.7242	36.4721	36.52
412	2017-09-19	13:30:00		36.76		67.4524	63.3636	67.6		36.7223	36.4858	36.5758
413	2017-09-19	14:00:00	92	36.76		68.1429	65.1364	71.8		36.72	36.4996	36.6133
414	2017-09-19	14:30:00	73	36.87		67.9286	66.0909	74.1		36.7246	36.5146	36.65
415	2017-09-19	15:00:00	51	36.76		67.4524	66.0909	68.5		36.7246	36.5237	36.6683
416	2017-09-19	15:30:00	101	36.99		68.3095	68.0909	71.4545		36.7294	36.5425	36.7058
417	2017-09-19	16:00:00	89	36.54		68.3333	69.6364	75.0909		36.72	36.5425	36.6967
418	2017-09-19	16:30:00	105	36.87		69.0476	72.0455	77.8182		36.7152	36.5562	36.715
419	2017-09-19	17:00:00	93	36.99		69.4762	73.7727	80.0909		36.7129	36.5796	36.7617
420	2017-09-19	17:30:00		37.1		68.9512	74.3333	83.3		36.7129	36.6125	36.8175
421	2017-09-19	18:00:00	71	36.99		68.6585	75.1905	82.8		36.7106	36.6454	36.8458
422	2017-09-19	18:30:00	159	37.1		70.6341	79.9524	90.3		36.7094	36.6783	36.8742
423	2017-09-19	19:00:00		37.1		70.525	81.05	92.6667		36.7071	36.7112	36.9025
424	2017-09-19	19:30:00		37.1		70.2564	79.4737	92.6667		36.7048	36.7533	36.9308
425	2017-09-19	20:00:00	81	37.1		70.4359	81.1053	91.4444		36.7048	36.7863	36.9592
426	2017-09-19	20:30:00	70	37.1		70.425	82.1579	91.1111		36.7025	36.8142	36.9783
427	2017-09-19	21:00:00	71	37.1		70.439	80.2632	93.3333		36.7012	36.8375	37.0067
428	2017-09-19	21:30:00		37.1		70.439	80.2632	92.375		36.699	36.8608	37.0158
429	2017-09-19	22:00:00		37.1		70.4	82	92.8571		36.6967	36.8796	37.0625
430	2017-09-19	22:30:00		36.99		70.4103	82.4118	90.8333		36.6944	36.8938	37.0725
431	2017-09-19	23:00:00	81	36.99		70.6923	83.1765	88.8333		36.6969	36.9171	37.0725
432	2017-09-19	23:30:00	66	36.87		70.8462	84.2353	85.5714		36.6992	36.9354	37.0533
433	2017-09-20	00:00:00	64	36.76		71	83.5294	84.5714		36.6992	36.94	37.0342
434	2017-09-20	00:30:00		36.76		71.3947	83.5	72.1667		36.7015	36.94	37.0058
435	2017-09-20	01:00:00		36.76		71.9189	84.4667	72.1667		36.706	36.94	36.9775
436	2017-09-20	01:30:00	58	36.76		71.5526	82.8125	70.1429		36.7129	36.94	36.9492
437	2017-09-20	02:00:00	21	36.82		70.7105	78.375	61.5714		36.721	36.9425	36.9258
438	2017-09-20	02:30:00	58	36.79		70.8684	77.4375	59.8571		36.7269	36.9392	36.9
439	2017-09-20	03:00:00	54	36.76		70.9474	77.625	57.4286		36.7315	36.9392	36.8717
440	2017-09-20	03:30:00	57	36.65		70.9474	74.875	57.375		36.7337	36.925	36.8342
441	2017-09-20	04:00:00	55	36.65		70.9474	72.75	57.1111		36.736	36.9296	36.7967
442	2017-09-20	04:30:00	52	36.54		70.9474	69.4375	56.6		36.736	36.9158	36.7592
443	2017-09-20	05:00:00	52	36.4		70.8684	66.875	53.7		36.7354	36.8912	36.71
444	2017-09-20	05:30:00	50	36.2		70.5526	65.8824	52.1		36.7331	36.8537	36.6542
445	2017-09-20	06:00:00	49	35.98		70.4474	64.5882	50.6		36.7285	36.8117	36.5892
446	2017-09-20	06:30:00	66	36.06		70.6316	59.1176	52		36.7233	36.7683	36.5308
447	2017-09-20	07:00:00	62	36.31		70.7368	59.2778	52.8333		36.7233	36.7354	36.4933
448	2017-09-20	07:30:00	57	36.31		69.3158	59.1579	52.75		36.7279	36.7025	36.4558
449	2017-09-20	08:00:00	48	36.2		69.2632	57.4211	55		36.7256	36.665	36.4042
450	2017-09-20	08:30:00	87	36.2		70.2368	58.3158	57.4167		36.7208	36.6275	36.355
451	2017-09-20	09:00:00	48	36.43		68.6842	57.1053	56.9167		36.7185	36.5996	36.3275
452	2017-09-20	09:30:00	69	36.76		68.6923	57.7	57.9167		36.7231	36.5854	36.3367
453	2017-09-20	10:00:00	65	36.87		69.1026	58.0476	58.75		36.7277	36.5758	36.355
454	2017-09-20	10:30:00	66	36.76		68.8718	58.4091	59.9167		36.73	36.5662	36.3733
455	2017-09-20	11:00:00		36.65		68.8947	57.3333	60.6364		36.7346	36.5521	36.3942
456	2017-09-20	11:30:00	75	36.65		69.6053	57.7619	62.9091		36.7392	36.5429	36.4317
457	2017-09-20	12:00:00	73	36.87		69.5263	58.1905	65.0909		36.7438	36.5475	36.5058
458	2017-09-20	12:30:00	58	36.99		68.8421	58.1818	64.3636		36.7485	36.5571	36.5833
459	2017-09-20	13:00:00	56	36.99		68.5	58.087	63.8182		36.7533	36.5667	36.64
460	2017-09-20	13:30:00	84	36.87		68.8974	59.2174	66.2727		36.7556	36.5712	36.6867
461	2017-09-20	14:00:00		36.87		68.2895	60.9545	68.1		36.7579	36.5733	36.7425
462	2017-09-20	14:30:00	78	36.99		68.4211	61.8636	67.2		36.7604	36.5817	36.8083
463	2017-09-20	15:00:00	98	36.99		69.6579	63.8636	72.2		36.7652	36.5912	36.855
464	2017-09-20	15:30:00	41	37.1		68.0789	63.1364	69.4		36.7675	36.61	36.8833
465	2017-09-20	16:00:00	85	37.21		67.9737	64.5	71.4		36.7815	36.6333	36.9117
466	2017-09-20	16:30:00	92	37.21		67.6316	66.3182	74		36.7885	36.6613	36.9492
467	2017-09-20	17:00:00	82	37.21		67.3421	67.6818	74.7273		36.7931	36.695	36.9958
468	2017-09-20	17:30:00	78	37.21		67.6154	68.9545	75		36.7954	36.7371	37.0425
469	2017-09-20	18:00:00	77	37.1		67.7692	70.2273	75.3636		36.7977	36.7838	37.0617
470	2017-09-20	18:30:00	75	37.21		65.6154	70.6364	76.9091		36.8	36.8317	37.08
471	2017-09-20	19:00:00	90	37.1		66.225	71.9091	80		36.8	36.8646	37.0892
472	2017-09-20	19:30:00	88	37.33		66.7561	73.3182	80.3636		36.8048	36.9071	37.1275
473	2017-09-20	20:00:00	68	37.1		66.439	74.2273	79.3333		36.8048	36.9446	37.1467
474	2017-09-20	20:30:00	60	37.1		66.1951	73	77.8333		36.8048	36.9821	37.1558
475	2017-09-20	21:00:00	72	36.99		66.2195	74.0909	75.6667		36.8025	37.0054	37.1558
476	2017-09-20	21:30:00	61	37.1		66.0952	73.7273	77.3333		36.8025	37.0196	37.1558
477	2017-09-20	22:00:00	57	37.1		65.8837	73.3636	75		36.8025	37.0292	37.1467
478	2017-09-20	22:30:00	60	37.1		65.75	73.0909	72.3333		36.8048	37.0433	37.1375
479	2017-09-20	23:00:00	56	37.1		65.1818	72.3478	70.1667		36.8071	37.0621	37.1283
480	2017-09-20	23:30:00	56	36.87		64.9545	71.5217	68.3333		36.8071	37.0713	37.1
481	2017-09-21	00:00:00	53	36.76		64.7045	70.6522	66.3333		36.8071	37.0667	37.0717
482	2017-09-21	00:30:00	58	36.65		64.5556	70.6522	64.9167		36.8048	37.0525	37.025
483	2017-09-21	01:00:00	59	36.65		64.4348	70.7826	62.3333		36.8025	37.0383	36.9875
484	2017-09-21	01:30:00	54	36.54		64.3478	69.4783	59.5		36.7979	37.0246	36.9217
485	2017-09-21	02:00:00	52	36.65		65.0217	68.75	58.1667		36.7944	37.0154	36.8842
486	2017-09-21	02:30:00	56	36.65		64.9783	67.8333	57.8333		36.7915	37.0012	36.8467
487	2017-09-21	03:00:00	53	36.54		64.9565	65.9583	56.25		36.7869	36.9825	36.8092
488	2017-09-21	03:30:00	50	36.54		64.8043	66.3333	55.3333		36.7846	36.9592	36.7625
489	2017-09-21	04:00:00	55	36.65		64.8043	65.0833	55.1667		36.7846	36.9358	36.725
490	2017-09-21	04:30:00	63	36.65		65.0435	63.875	55.4167		36.7869	36.9125	36.6875
491	2017-09-21	05:00:00	48	36.54		64.9565	62.4583	54.75		36.7898	36.8846	36.6408
492	2017-09-21	05:30:00	46	36.54		64.8696	61.125	53.9167		36.7969	36.8567	36.6133
493	2017-09-21	06:00:00	49	36.43		64.8696	59.9583	53.5833		36.8062	36.8287	36.5858
494	2017-09-21	06:30:00	53	36.43		64.587	59.0417	53.1667		36.814	36.7962	36.5675
495	2017-09-21	07:00:00	50	36.43		64.3261	57.375	52.4167		36.8165	36.7683	36.5492
496	2017-09-21	07:30:00	65	36.43		64.5	56.4167	53.3333		36.819	36.7308	36.54
497	2017-09-21	08:00:00	52	36.43		64.587	55.75	53.3333		36.8238	36.7029	36.5217
498	2017-09-21	08:30:00	55	36.09		63.8913	55.5417	53.25		36.8215	36.6608	36.475
499	2017-09-21	09:00:00	69	36.43		64.3478	55.4167	54.5833		36.8215	36.6375	36.4658
500	2017-09-21	09:30:00	67	36.76		64.3043	55.6667	56		36.8215	36.6233	36.4842
501	2017-09-21	10:00:00		36.76		64.2889	55.6087	56.0909		36.8192	36.6092	36.4933
502	2017-09-21	10:30:00	78	36.76		64.5556	56.3913	57.4545		36.8192	36.595	36.5025
503	2017-09-21	11:00:00	182	36.54		67.1087	61.8696	69.6364		36.8169	36.5717	36.5025
504	2017-09-21	11:30:00		36.76		66.9333	62.1364	72		36.8192	36.5671	36.5208
505	2017-09-21	12:00:00	63	36.76		66.7111	62.5909	73.4		36.8169	36.5671	36.5483
506	2017-09-21	12:30:00	79	36.87		67.1778	63.5455	76		36.8144	36.5762	36.585
507	2017-09-21	13:00:00	70	36.87		67.4889	64.0455	78		36.8119	36.5854	36.6217
508	2017-09-21	13:30:00	41	36.65		66.5333	63.4545	75.6		36.8073	36.59	36.64
509	2017-09-21	14:00:00	72	36.76		66.6522	64.3636	77.6		36.805	36.5946	36.6675
510	2017-09-21	14:30:00		36.87		66.4	64.7619	80.1111		36.8025	36.6037	36.7325
511	2017-09-21	15:00:00	87	36.99		66.1556	66.381	82.1111		36.8025	36.6225	36.7792
512	2017-09-21	15:30:00	100	36.87		67.4667	68.7619	85.7778		36.7977	36.6362	36.7883
513	2017-09-21	16:00:00	33	36.99		66.3111	67.7143	80.5		36.7931	36.6504	36.8075
514	2017-09-21	16:30:00	25	36.99		64.8222	65.9048	75.2		36.7885	36.6646	36.8267
515	2017-09-21	17:00:00	105	36.99		65.3333	68.619	67.5		36.784	36.6833	36.8642
516	2017-09-21	17:30:00	80	37.1		65.3778	70.2381	68.6364		36.7817	36.7067	36.8925
517	2017-09-21	18:00:00		36.99		65.1136	71.3	69.2		36.7794	36.73	36.9117
518	2017-09-21	18:30:00		37.1		64.8837	72.2632	68.1111		36.7771	36.7579	36.9308
519	2017-09-21	19:00:00	77	37.1		64.5814	73.6842	68.8889		36.7771	36.7858	36.95
520	2017-09-21	19:30:00	83	36.99		64.4651	74.6316	73.5556		36.77	36.8092	36.9783
521	2017-09-21	20:00:00	70	36.99		64.5116	75.5789	73.3333		36.7677	36.8325	36.9975
522	2017-09-21	20:30:00	68	37.1		64.6977	76.2632	72.8		36.7677	36.8746	37.0167
523	2017-09-21	21:00:00	115	36.99		65.6977	78.6842	75.6		36.7677	36.8979	37.0167
524	2017-09-21	21:30:00	66	37.21		65.814	78.6316	72.2		36.77	36.9167	37.045
525	2017-09-21	22:00:00	70	37.55		66.1163	78.2	75.9		36.7794	36.9496	37.0917
526	2017-09-21	22:30:00	66	37.21		66.2558	77.6	80		36.7817	36.9683	37.11
527	2017-09-21	23:00:00	59	36.99		66.3256	71.45	75.4		36.7794	36.9871	37.11
528	2017-09-21	23:30:00	54	36.76		66.2791	70.619	72.8		36.7771	36.9871	37.0817
529	2017-09-22	00:00:00	63	36.65		66.5116	70.619	71.9091		36.7748	36.9825	37.0533
530	2017-09-22	00:30:00	52	36.65		66.3721	69.3333	70.25		36.7748	36.9733	37.0158
531	2017-09-22	01:00:00	53	36.54		66.2326	68.5238	68.25		36.7725	36.9596	36.9692
532	2017-09-22	01:30:00	57	36.65		66.3023	69.2857	66.0833		36.7748	36.9596	36.9408
533	2017-09-22	02:00:00	53	36.65		66.3256	68.381	64.6667		36.7748	36.955	36.9125
534	2017-09-22	02:30:00	63	36.65		66.4884	68.1364	64.25		36.7748	36.9458	36.875
535	2017-09-22	03:00:00	52	36.65		66.4651	66.5455	59		36.7771	36.9317	36.8467
536	2017-09-22	03:30:00	63	36.54		66.7674	64.8636	58.75		36.7771	36.9179	36.7908
537	2017-09-22	04:00:00	54	36.54		66.7442	65.8182	57.4167		36.7748	36.8992	36.7067
538	2017-09-22	04:30:00	53	36.54		66.5116	67.0909	56.3333		36.7725	36.8804	36.6508
539	2017-09-22	05:00:00	51	36.54		66.5814	64.6364	55.6667		36.7725	36.8617	36.6133
540	2017-09-22	05:30:00	43	36.54		66.5116	62.9545	54.75		36.7725	36.8383	36.595
541	2017-09-22	06:00:00	45	36.54		66.4186	62.1739	53.25		36.7748	36.8196	36.5858
542	2017-09-22	06:30:00	73	36.31		66.8837	62.625	55		36.7723	36.7867	36.5575
543	2017-09-22	07:00:00		36.2		67.2857	62	55.1818		36.7675	36.7492	36.5292
544	2017-09-22	07:30:00		36.43		67.3415	61.0455	55		36.7675	36.7258	36.5108
545	2017-09-22	08:00:00	31	36.43		66.8293	59.2727	52.8		36.7675	36.7025	36.4925
546	2017-09-22	08:30:00	50	36.54		66.7073	58.4545	51.5		36.7769	36.6792	36.4833
547	2017-09-22	09:00:00	60	36.76		66.4878	55.9545	52.3		36.7838	36.6696	36.4925
548	2017-09-22	09:30:00	55	36.76		66.1951	55.4545	51.5		36.7838	36.6508	36.5108
549	2017-09-22	10:00:00	78	36.87		66.4762	55.8182	53.9		36.786	36.6225	36.5383
550	2017-09-22	10:30:00	90	36.76		66.7619	56.9091	57.6		36.786	36.6037	36.5567
551	2017-09-22	11:00:00	65	36.87		63.9762	57.1818	59		36.7929	36.5987	36.5842
552	2017-09-22	11:30:00	82	36.87		64.3953	58.4545	62.9		36.7952	36.6033	36.6117
553	2017-09-22	12:00:00	78	36.87		64.7442	59.1364	66.2		36.7975	36.6125	36.6392
554	2017-09-22	12:30:00	62	36.76		64.3488	59.5909	65.1		36.7952	36.6171	36.6767
555	2017-09-22	13:00:00	81	36.76		64.6047	60.8636	66.5455		36.7929	36.6262	36.7233
556	2017-09-22	13:30:00	79	36.87		65.4884	61.8636	67.5833		36.7975	36.6354	36.76
557	2017-09-22	14:00:00	79	36.76		65.6512	63.0455	71.5833		36.7975	36.64	36.7875
558	2017-09-22	14:30:00	74	36.87		65.8409	63.5455	73.5833		36.7975	36.6492	36.815
559	2017-09-22	15:00:00	85	36.99		65.7955	65.0455	75.6667		36.7975	36.6633	36.8342
560	2017-09-22	15:30:00	20	36.87		63.9773	63.0909	72.75		36.7975	36.6771	36.8433
561	2017-09-22	16:00:00	88	36.99		65.2273	64.6364	73.5833		36.7975	36.6958	36.8533
562	2017-09-22	16:30:00	96	36.99		66.8409	66.5909	74.0833		36.7975	36.7146	36.8725
563	2017-09-22	17:00:00	88	36.87		66.4545	68.2727	76		36.795	36.7283	36.8725
564	2017-09-22	17:30:00	70	36.76		66.2273	69.5	75		36.7879	36.7375	36.8633
565	2017-09-22	18:00:00	141	36.87		67.8889	73.8636	80.25		36.7854	36.7512	36.8633
566	2017-09-22	18:30:00	69	37.1		67.913	73.6818	80.8333		36.7854	36.7842	36.8917
567	2017-09-22	19:00:00		37.1		67.7111	73.6818	80.8182		36.7854	36.8217	36.92
568	2017-09-22	19:30:00	65	37.1		67.3111	73.3043	79.5455		36.7877	36.8496	36.9392
569	2017-09-22	20:00:00	65	37.1		67.2	74.7826	78.2727		36.79	36.8775	36.9675
570	2017-09-22	20:30:00	73	37.1		67.3111	75.7826	78.1818		36.79	36.9008	36.9867
571	2017-09-22	21:00:00	60	36.99		66.0889	75.7826	75.9091		36.79	36.9104	36.9867
572	2017-09-22	21:30:00	63	36.99		66.0222	76.1304	79.8182		36.7854	36.92	36.9967
573	2017-09-22	22:00:00	54	36.87		65.6667	75.087	76.7273		36.7712	36.92	36.9867
574	2017-09-22	22:30:00	59	36.87		65.5111	73.7391	73.3636		36.7642	36.9246	36.9767
575	2017-09-22	23:00:00	57	36.87		65.4667	73.3913	70.5455		36.7617	36.9246	36.9767
576	2017-09-22	23:30:00	55	36.87		65.4889	72.2174	69.1818		36.764	36.9246	36.9858
577	2017-09-23	00:00:00	59	36.68		65.4	71.3913	61.7273		36.7646	36.9167	36.97
578	2017-09-23	00:30:00	58	36.76		65.5333	71.2174	60.7273		36.7669	36.9167	36.9417
579	2017-09-23	01:00:00	56	36.87		65.6	70.1304	60.3333		36.7737	36.9213	36.9225
580	2017-09-23	01:30:00	197	36.76		68.7111	75.2609	71.3333		36.776	36.9167	36.8942
581	2017-09-23	02:00:00		36.62		69.0682	75.0909	71.9091		36.7754	36.9108	36.8542
582	2017-09-23	02:30:00	56	36.54		68.9091	74.2727	70.3636		36.7731	36.8971	36.8075
583	2017-09-23	03:00:00		36.65		69.3023	73.7619	71.4		36.7731	36.8829	36.7792
584	2017-09-23	03:30:00	57	36.62		69.1628	75.5238	70.8		36.7748	36.8725	36.7483
585	2017-09-23	04:00:00	51	36.54		69.093	73.7619	70.5		36.7748	36.8537	36.7208
586	2017-09-23	04:30:00		36.54		69.4762	72.65	71.7778		36.7748	36.835	36.6933
587	2017-09-23	05:00:00		36.54		69.9268	71.8421	73.625		36.7748	36.8212	36.6658
588	2017-09-23	05:30:00	75	36.65		70.7073	72.1053	76.125		36.7771	36.8167	36.6475
589	2017-09-23	06:00:00	50	36.31		70.8293	67.3158	75		36.7723	36.7933	36.6167
590	2017-09-23	06:30:00	44	36.2		70.122	66	73.25		36.77	36.7558	36.57
591	2017-09-23	07:00:00	70	36.31		70.119	66.2	75		36.7723	36.7229	36.5233
592	2017-09-23	07:30:00	46	36.43		69.5581	65.25	56.125		36.7723	36.695	36.4958
593	2017-09-23	08:00:00	53	36.31		70.0698	64.65	55.7778		36.7698	36.6621	36.47
594	2017-09-23	08:30:00	57	36.2		70.2326	63.85	55.8889		36.7627	36.6246	36.4417
595	2017-09-23	09:00:00	68	36.54		70.4186	64.25	57.1		36.7581	36.6058	36.4325
596	2017-09-23	09:30:00	78	36.73		70.9535	65	59.2		36.7575	36.595	36.4417
597	2017-09-23	10:00:00	59	36.76		70.5116	65.25	60		36.7552	36.5904	36.46
598	2017-09-23	10:30:00	72	36.76		70.093	65.9	61.0909		36.7552	36.5858	36.4783
599	2017-09-23	11:00:00	73	36.87		70.2791	66.7	62.0833		36.7552	36.5858	36.5058
600	2017-09-23	11:30:00	61	36.87		69.7907	67	60.9167		36.7552	36.5858	36.5242
601	2017-09-23	12:00:00	77	36.43		69.7674	67.9	63.1667		36.746	36.5754	36.5342
602	2017-09-23	12:30:00	72	36.76		70	68.6	65.5		36.746	36.5754	36.5808
603	2017-09-23	13:00:00	68	36.87		69.6977	69.2	65.3333		36.7483	36.5754	36.6275
604	2017-09-23	13:30:00	90	36.76		69.9535	63.85	69		36.746	36.5754	36.655
605	2017-09-23	14:00:00		36.76		69.7381	63.85	70.4545		36.746	36.5812	36.6925
606	2017-09-23	14:30:00	119	36.87		70.8095	67	76.0909		36.746	36.595	36.7483
607	2017-09-23	15:00:00	82	36.99		70.7381	67.7143	77.3636		36.746	36.6092	36.7858
608	2017-09-23	15:30:00	92	36.87		72.4524	69.381	78.6364		36.746	36.6196	36.7975
609	2017-09-23	16:00:00	28	36.93		71.0238	68.2857	75.8182		36.7448	36.6358	36.8117
610	2017-09-23	16:30:00	51	36.99		69.9524	67.5	73.9091		36.7448	36.6546	36.8308
611	2017-09-23	17:00:00	94	37.1		70.0952	68.6522	75.8182		36.7496	36.6779	36.85
612	2017-09-23	17:30:00	96	37.21		70.7143	69.5652	79		36.759	36.7012	36.8783
613	2017-09-23	18:00:00	92	37.1		69.5476	71.3913	80.3636		36.7637	36.7342	36.9342
614	2017-09-23	18:30:00	66	37.1		69.4762	72.3478	79.8182		36.7637	36.7717	36.9625
615	2017-09-23	19:00:00	73	36.87		69.5581	72.4783	80.2727		36.759	36.795	36.9625
616	2017-09-23	19:30:00		36.76		69.6667	73.6818	79.3		36.7519	36.8087	36.9625
617	2017-09-23	20:00:00	73	36.87		69.8571	74.5909	78.7273		36.7471	36.8321	36.9717
618	2017-09-23	20:30:00		36.76		69.7805	75.4286	74.7		36.74	36.8554	36.9625
619	2017-09-23	21:00:00	60	37.1		69.7805	75.0476	72.5		36.7423	36.8788	36.9717
620	2017-09-23	21:30:00	53	37.1		69.5366	73.8571	68.6		36.7446	36.8942	36.9908
621	2017-09-23	22:00:00	53	36.99		69.5122	73.5714	71.1		36.7471	36.9038	36.9958
622	2017-09-23	22:30:00	59	36.99		69.5122	72.9524	71.9		36.7496	36.9133	36.9958
623	2017-09-23	23:00:00	54	36.87		69.439	72.0476	67.9		36.7496	36.9133	36.9767
624	2017-09-23	23:30:00	53	36.76		69.3902	71.6667	63.6		36.7473	36.9088	36.9392
625	2017-09-24	00:00:00	47	36.65		69.0976	70.2381	59.1		36.7467	36.9179	36.9017
626	2017-09-24	00:30:00	51	36.54		68.9268	69.2381	57.6		36.7421	36.9088	36.855
627	2017-09-24	01:00:00	59	36.54		69	68.8095	56.2		36.7352	36.895	36.8275
628	2017-09-24	01:30:00	50	36.54		65.4146	66.9048	55.6364		36.7306	36.8858	36.8092
629	2017-09-24	02:00:00	50	36.54		65.0476	66.1364	53.5455		36.729	36.8767	36.7817
630	2017-09-24	02:30:00	54	36.54		65	63.1818	53.5833		36.729	36.8629	36.7633
631	2017-09-24	03:00:00	60	36.65		64.8837	62.1818	53.5833		36.729	36.8487	36.7258
632	2017-09-24	03:30:00	49	36.65		64.6977	60.2273	53.25		36.7296	36.8396	36.6883
633	2017-09-24	04:00:00	46	36.65		64.5814	61.0455	52.6667		36.7319	36.8279	36.66
634	2017-09-24	04:30:00	50	36.65		64.25	61	51.9167		36.7342	36.8137	36.6317
635	2017-09-24	05:00:00	43	36.76		63.7778	58.6818	51		36.7388	36.7996	36.6225
636	2017-09-24	05:30:00	166	36.71		65.8	61.8636	60.4167		36.74	36.7787	36.6183
637	2017-09-24	06:00:00	43	36.54		65.6444	59.6364	60.0833		36.7448	36.7554	36.6092
638	2017-09-24	06:30:00	38	36.65		65.5111	58.3636	59		36.7542	36.7367	36.6183
639	2017-09-24	07:00:00		36.2		65.4091	57.6667	59		36.7519	36.7087	36.59
640	2017-09-24	07:30:00		36.09		65.8605	57.6667	59.9		36.7448	36.6808	36.5525
641	2017-09-24	08:00:00	57	36.2		65.9535	56.9048	60.6		36.7425	36.6529	36.5242
642	2017-09-24	08:30:00	82	36.17		66.5349	58.0455	63.4		36.7419	36.6283	36.4933
643	2017-09-24	09:00:00	68	36.2		66.5349	58.4091	64.2		36.7348	36.5908	36.4558
644	2017-09-24	09:30:00	60	36.54		66.1163	58.7273	65.3		36.7308	36.5675	36.4467
645	2017-09-24	10:00:00	66	36.65		66.2791	59.3182	67.3		36.7285	36.5533	36.4467
646	2017-09-24	10:30:00	87	36.76		66.6279	60.5909	71		36.7285	36.5437	36.4558
647	2017-09-24	11:00:00	62	36.87		66.3721	60.9545	72.9		36.7285	36.5437	36.465
648	2017-09-24	11:30:00	60	36.87		66.3488	61.2727	62.3		36.7285	36.5483	36.4783
649	2017-09-24	12:00:00	66	36.76		66.093	62.1364	64.6		36.7354	36.5529	36.4967
650	2017-09-24	12:30:00	71	36.76		66.0698	63.0455	67.9		36.7354	36.5621	36.5058
651	2017-09-24	13:00:00	65	36.87		66	63.3182	67.6364		36.7354	36.5758	36.5617
652	2017-09-24	13:30:00	65	36.99		65.4186	64	67.4167		36.7402	36.5946	36.6367
653	2017-09-24	14:00:00	82	36.87		65.7955	65.4545	69.5		36.7425	36.6083	36.6925
654	2017-09-24	14:30:00	38	36.65		63.9545	64.7273	65.8333		36.7379	36.6129	36.7325
655	2017-09-24	15:00:00	30	36.76		62.7727	63.3636	62.6667		36.7331	36.6175	36.7792
656	2017-09-24	15:30:00	41	36.99		61.6136	63	61.0833		36.7356	36.6317	36.8167
657	2017-09-24	16:00:00	89	36.99		63	64.9545	63		36.7369	36.6458	36.845
658	2017-09-24	16:30:00		37.1		63.2791	65.6667	60.8182		36.7392	36.6646	36.8733
659	2017-09-24	17:00:00	63	37.33		62.5581	66.619	60.9091		36.744	36.6883	36.9117
660	2017-09-24	17:30:00	78	37.21		62.1395	62.4286	62.5455		36.744	36.7092	36.94
661	2017-09-24	18:00:00	66	37.21		61.5349	63.5238	62.5455		36.7462	36.7371	36.9775
662	2017-09-24	18:30:00		37.21		61.4286	64.8	61.7		36.7485	36.7604	37.015
663	2017-09-24	19:00:00		37.21		61.1463	64.8	61.3333		36.7556	36.8025	37.0433
664	2017-09-24	19:30:00		37.21		61.1463	64.8	60.875		36.765	36.8492	37.0617
665	2017-09-24	20:00:00	75	37.1		61.1951	65.7	60		36.7698	36.8867	37.0808
666	2017-09-24	20:30:00	77	36.99		61.5714	65.45	64.875		36.7746	36.9208	37.1092
667	2017-09-24	21:00:00	75	36.76		61.9286	65.8	70.5		36.7675	36.9442	37.1092
668	2017-09-24	21:30:00	57	36.65		62.0238	65.65	72.5		36.7581	36.9488	37.0808
669	2017-09-24	22:00:00	55	36.65		62.0714	65.1	68.25		36.751	36.9488	37.0525
670	2017-09-24	22:30:00	56	36.54		62	63.55	66.8889		36.7417	36.9396	37.0058
671	2017-09-24	23:00:00	90	36.54		62.8571	64.95	69.8889		36.7348	36.9258	36.94
672	2017-09-24	23:30:00	55	36.54		62.9048	64.7	67.3333		36.7302	36.9121	36.8842
673	2017-09-25	00:00:00	59	36.43		63.1905	64.35	66.5556		36.7256	36.8983	36.8192
674	2017-09-25	00:30:00	57	36.31		63.3333	63.65	65.6		36.7208	36.8796	36.7442
675	2017-09-25	01:00:00	60	36.43		63.3571	63.4	65.0909		36.7185	36.8612	36.6792
676	2017-09-25	01:30:00	51	36.54		63.381	62.7	63.9167		36.7185	36.8425	36.6233
677	2017-09-25	02:00:00	50	36.65		63.381	61.1	61.8333		36.7208	36.8333	36.5858
678	2017-09-25	02:30:00	55	36.65		63.4048	61.95	60		36.7231	36.8333	36.5575
679	2017-09-25	03:00:00	48	36.57		63.119	62.85	57.75		36.7215	36.8254	36.5417
680	2017-09-25	03:30:00	52	36.65		63.1905	63.4	57.3333		36.7215	36.8112	36.5417
681	2017-09-25	04:00:00	59	36.65		63.5	61.9	57.6667		36.7215	36.7971	36.5417
682	2017-09-25	04:30:00	75	36.54		64.0952	62.5238	59.25		36.7192	36.7737	36.5417
683	2017-09-25	05:00:00	43	36.62		64.0952	61.5714	55.3333		36.7163	36.7442	36.5483
684	2017-09-25	05:30:00	44	36.54		61.1905	59.9524	54.4167		36.7127	36.7162	36.5483
685	2017-09-25	06:00:00		36.31		61.6341	59.65	54		36.7079	36.6788	36.5383
686	2017-09-25	06:30:00	36	35.98		61.5854	58.5238	52.0909		36.694	36.6275	36.5108
687	2017-09-25	07:00:00	57	35.65		61.4762	58.4545	51.8182		36.6825	36.5625	36.4458
688	2017-09-25	07:30:00	63	35.87		61.5116	58.6522	52.9091		36.6779	36.5067	36.39
689	2017-09-25	08:00:00		35.98		61.619	57.9091	53.2		36.6733	36.46	36.3342
690	2017-09-25	08:30:00	72	36.2		61.381	57.6818	54.9		36.674	36.4271	36.2967
691	2017-09-25	09:00:00	83	36.2		61.7381	58.0455	58.4		36.674	36.4038	36.2658
692	2017-09-25	09:30:00	68	36.43		61.9286	58.5455	60		36.6717	36.3946	36.2475
693	2017-09-25	10:00:00	76	36.31		62.1667	59.5	61.7		36.6646	36.3804	36.2192
694	2017-09-25	10:30:00	138	36.2		63.381	63.2273	68		36.6529	36.3663	36.1908
695	2017-09-25	11:00:00		36.31		63.4146	61.9524	70.7778		36.6413	36.3567	36.165
696	2017-09-25	11:30:00	192	36.43		66.6341	68.4762	87.2222		36.6321	36.3521	36.1558
697	2017-09-25	12:00:00	55	36.54		66.3659	68.2857	84		36.6275	36.3567	36.175
698	2017-09-25	12:30:00	69	36.76		66.3171	68.8571	87.3		36.6275	36.3754	36.24
699	2017-09-25	13:00:00	141	36.87		68.1707	72.7143	95.7		36.6275	36.3938	36.3417
700	2017-09-25	13:30:00	83	36.87		68.6098	74.2381	97.7		36.625	36.4075	36.425
701	2017-09-25	14:00:00	64	36.65		68.1707	74.9048	94.6364		36.6204	36.4075	36.4808
702	2017-09-25	14:30:00		36.65		68.925	75.9	96.9		36.6204	36.4075	36.5183
703	2017-09-25	15:00:00	70	36.99		69.925	77	95.6		36.6252	36.425	36.5842
704	2017-09-25	15:30:00	74	36.87		70.75	78.1	96.2		36.6227	36.4342	36.6208
705	2017-09-25	16:00:00	192	36.65		73.325	84.75	107.8		36.6156	36.4342	36.6492
706	2017-09-25	16:30:00	91	36.59		73.7561	85.55	103.1		36.605	36.4362	36.6817
707	2017-09-25	17:00:00		36.65		74.025	87.7895	103.1		36.5908	36.4375	36.71
708	2017-09-25	17:30:00	72	36.76		73.875	89.2632	91.1		36.5815	36.4467	36.7375
709	2017-09-25	18:00:00	60	36.99		73.725	87.8	91.6		36.5769	36.475	36.775
710	2017-09-25	18:30:00		36.99		73.725	90.5263	94.1111		36.5723	36.5171	36.7942
711	2017-09-25	19:00:00	119	37.02		74.8293	93.7895	91.6667		36.5683	36.5742	36.8067
712	2017-09-25	19:30:00		37.1		74.8293	95.5	92.75		36.566	36.6254	36.8258
713	2017-09-25	20:00:00	64	37.1		74.561	93.8421	92.75		36.566	36.6721	36.8633
714	2017-09-25	20:30:00		36.76		74.5	95.0556	92.75		36.5612	36.6954	36.8725
715	2017-09-25	21:00:00	78	36.87		74.575	94.7778	93.75		36.5635	36.7233	36.8625
716	2017-09-25	21:30:00	81	37.1		75.175	95.5	94.625		36.5729	36.7512	36.8817
717	2017-09-25	22:00:00	144	36.87		77.4	99.2778	88.625		36.5775	36.7746	36.9
718	2017-09-25	22:30:00		37.21		77.9487	97	88.2857		36.5915	36.8167	36.9517
719	2017-09-25	23:00:00		37.21		77.6316	97	88.2857		36.6054	36.8542	36.9983
720	2017-09-25	23:30:00	71	37.1		78.0526	89.8824	88.1429		36.6171	36.8821	37.0267
721	2017-09-26	00:00:00		37.1		78.5676	92.0625	92.8333		36.631	36.9054	37.0358
722	2017-09-26	00:30:00		36.99		79.1667	93.6	92.8333		36.6452	36.915	37.0358
723	2017-09-26	01:00:00		36.99		79.7143	90.2143	87.6		36.6569	36.92	37.0333
724	2017-09-26	01:30:00		36.87		80.5588	90.7692	87.6		36.6637	36.92	37.0142
725	2017-09-26	02:00:00		36.79		81.4848	93	93.5		36.6667	36.9258	36.9883
726	2017-09-26	02:30:00		36.87		82.3125	93	93.5		36.6712	36.935	36.9975
727	2017-09-26	03:00:00	61	36.76		82.7188	92.25	89.25		36.6752	36.9254	36.9883
728	2017-09-26	03:30:00		36.76		83.7097	93.9091	92		36.6775	36.9208	36.96
729	2017-09-26	04:00:00	67	36.76		83.9677	82.5455	66.3333		36.6798	36.9254	36.9508
730	2017-09-26	04:30:00	91	36.54		84.4839	82.5455	72.5		36.6798	36.9233	36.895
731	2017-09-26	05:00:00	64	36.43		85.1613	81	70.8		36.6758	36.9142	36.83
732	2017-09-26	05:30:00		36.2		86.5333	81.8182	70.75		36.6687	36.8908	36.755
733	2017-09-26	06:00:00	56	36.31		85.5484	81.4545	67.8		36.6687	36.8625	36.6892
734	2017-09-26	06:30:00	82	36.2		87.0323	81.5	70.1667		36.6733	36.8296	36.6233
735	2017-09-26	07:00:00	49	35.98		86.7742	75.6667	67.1429		36.6802	36.7863	36.5392
736	2017-09-26	07:30:00	27	36.2		85.6129	71.9231	62.125		36.6871	36.7488	36.4833
737	2017-09-26	08:00:00	34	36.31		84	69.6154	59		36.694	36.7158	36.4433
738	2017-09-26	08:30:00	41	36.43		83.0312	67.5714	57.2		36.6987	36.7021	36.4067
739	2017-09-26	09:00:00	24	36.43		81.1875	63.7143	53.5		36.7035	36.6837	36.3792
740	2017-09-26	09:30:00	71	36.54		81.2812	63	55.0909		36.7058	36.6604	36.3608
741	2017-09-26	10:00:00	46	36.43		80.3438	56	53.1818		36.7083	36.6421	36.3333
742	2017-09-26	10:30:00		36.31		78.4839	56	49.4		36.7106	36.6046	36.3142
743	2017-09-26	11:00:00	88	36.31		78.7812	58.1333	51.8		36.7106	36.5671	36.3042
744	2017-09-26	11:30:00	131	36.43		76.875	62.1333	59		36.7106	36.5392	36.3233
745	2017-09-26	12:00:00	91	36.73		78	63.9375	62.1818		36.7146	36.5237	36.3583
746	2017-09-26	12:30:00	86	36.87		78.5312	65.2353	62.5455		36.7169	36.5187	36.4142
747	2017-09-26	13:00:00	67	37.1		76.2188	65.3333	64.1818		36.7217	36.5233	36.5075
748	2017-09-26	13:30:00		37.1		76	65.3333	67.9		36.7265	36.5329	36.5825
749	2017-09-26	14:00:00	74	37.1		76.3226	65.7895	71.9		36.7358	36.5458	36.6483
750	2017-09-26	14:30:00		36.76		76.3226	65.7895	75.3333		36.7381	36.5412	36.6758
751	2017-09-26	15:00:00	73	36.99		76.4194	66.4211	80.7778		36.7381	36.5508	36.7225
752	2017-09-26	15:30:00	75	36.87		76.4516	66.85	81.2222		36.7381	36.5554	36.75
753	2017-09-26	16:00:00	84	36.99		72.9677	67.7	85.4444		36.7452	36.565	36.7967
754	2017-09-26	16:30:00	122	37.21		73.9677	69.25	89.1		36.7581	36.5929	36.8717
755	2017-09-26	17:00:00	96	37.44		74.6562	70.85	89.9		36.7746	36.635	36.9658
756	2017-09-26	17:30:00	81	37.55		74.9375	71.3333	84.9		36.791	36.6913	37.0592
757	2017-09-26	18:00:00	27	37.67		73.9062	69.9524	78.5		36.8052	36.7479	37.1375
758	2017-09-26	18:30:00	79	37.67		74.0606	69.8095	77.8		36.8194	36.8092	37.2042
759	2017-09-26	19:00:00	68	37.67		72.5152	70.7143	77.9		36.8329	36.8796	37.2517
760	2017-09-26	19:30:00	67	37.58		72.3529	72.619	76.9091		36.8429	36.9371	37.2917
761	2017-09-26	20:00:00	91	37.44		73.1471	75.3333	78.4545		36.85	36.9842	37.32
762	2017-09-26	20:30:00	65	37.33		72.9143	76.4762	77.3333		36.8619	37.0217	37.3675
763	2017-09-26	21:00:00	67	37.35		72.6	78.5238	76.8333		36.8719	37.06	37.3975
764	2017-09-26	21:30:00	66	37.44		72.1714	78.2857	76.0833		36.879	37.0975	37.445
765	2017-09-26	22:00:00	69	37.33		70.0286	79.381	74.8333		36.8885	37.135	37.4733
766	2017-09-26	22:30:00	65	37.21		69.8889	78.7273	70.0833		36.8885	37.1725	37.4733
767	2017-09-26	23:00:00	68	37.21		69.8378	77.8182	67.75		36.8885	37.21	37.4542
768	2017-09-26	23:30:00	61	37.1		69.5676	74.6364	66.0833		36.8885	37.2379	37.4167
769	2017-09-27	00:00:00	68	36.99		69.5263	73.5909	69.5		36.8862	37.2488	37.36
770	2017-09-27	00:30:00	70	36.99		69.5385	72.8636	68.75		36.8862	37.2538	37.3033
771	2017-09-27	01:00:00	63	37.21		69.375	72.6818	68.3333		36.8908	37.2583	37.265
772	2017-09-27	01:30:00		37.27		69.375	72.6818	68.4545		36.8992	37.2654	37.2392
773	2017-09-27	02:00:00		37.21		69.375	72.619	66.2		36.9079	37.27	37.22
774	2017-09-27	02:30:00		37.21		69.375	72.619	66.3333		36.915	37.2888	37.21
775	2017-09-27	03:00:00		37.21		69.5897	72.6	66.25		36.9244	37.2979	37.1983
776	2017-09-27	03:30:00		37.21		69.5897	72.4737	66.2857		36.9338	37.3121	37.1792
777	2017-09-27	04:00:00	66	37.13		69.5641	71.5263	65.8571		36.9415	37.3179	37.1625
778	2017-09-27	04:30:00		37.1		69	68.7222	66		36.9531	37.3133	37.1533
779	2017-09-27	05:00:00	61	37.16		68.9211	66.7778	64.8333		36.9683	37.3017	37.1492
780	2017-09-27	05:30:00	65	37.21		68.8205	65.8889	65.5		36.9894	37.2875	37.1583
781	2017-09-27	06:00:00	58	36.99		68.8718	67.6111	63.8333		37.0035	37.2592	37.1583
782	2017-09-27	06:30:00	60	36.76		68.3077	66.5556	62.1667		37.0152	37.2213	37.1392
783	2017-09-27	07:00:00	65	36.2		68.7179	66.3889	62.5		37.0198	37.16	37.055
784	2017-09-27	07:30:00	94	35.98		70.4359	67.8889	67		37.0152	37.0933	36.9475
785	2017-09-27	08:00:00	111	36.2		72.4103	69	72.5		37.0129	37.0417	36.8633
786	2017-09-27	08:30:00	94	36.2		73.7692	70.6111	74.8889		37.0081	36.9946	36.7792
787	2017-09-27	09:00:00	76	36.54		75.1026	71.1111	75		37.0104	36.9608	36.7233
788	2017-09-27	09:30:00	66	36.76		74.9744	71.1111	74.1818		37.015	36.9325	36.6858
789	2017-09-27	10:00:00		37.1		75.7368	71.2353	75		37.029	36.9229	36.6833
790	2017-09-27	10:30:00	65	36.76		75.4615	71.2353	74.0909		37.0383	36.9042	36.655
791	2017-09-27	11:00:00	75	36.65		75.1282	71.6471	75.3636		37.0454	36.8808	36.6125
792	2017-09-27	11:30:00	70	36.54		73.5641	72.1765	75.8182		37.0477	36.8575	36.5567
793	2017-09-27	12:00:00		36.65		73.1053	72.4375	77.6		37.046	36.8433	36.5283
794	2017-09-27	12:30:00	74	36.54		72.7895	72.6875	79		37.0392	36.8246	36.51
795	2017-09-27	13:00:00	78	36.87		73.0789	73.625	80.3		37.0344	36.8104	36.5658
796	2017-09-27	13:30:00		36.76		73.0789	73.625	78.7778		37.0273	36.7892	36.6308
797	2017-09-27	14:00:00	92	36.65		73.5526	74.7059	76.6667		37.0179	36.7658	36.6683
798	2017-09-27	14:30:00	96	36.65		74.1282	75.8889	76.8889		37.0156	36.7425	36.7058
799	2017-09-27	15:00:00	81	36.76		74.3333	76.1579	77.4444		37.0108	36.7237	36.7242
800	2017-09-27	15:30:00	86	36.85		74.6154	76.65	79.6667		37.0104	36.7087	36.7317
801	2017-09-27	16:00:00		36.99		74.3684	77.2105	79.6667		37.0104	36.7029	36.7225
802	2017-09-27	16:30:00	47	37.21		72.3947	75.7	77.6667		37.0104	36.7075	36.76
803	2017-09-27	17:00:00	96	37.21		72.3947	77.45	80		37.0056	36.7096	36.8067
804	2017-09-27	17:30:00	78	37.1		72.3158	78.1	80.8889		36.9963	36.705	36.8533
805	2017-09-27	18:00:00	75	37.21		73.5789	78.95	80.3		36.9867	36.7142	36.9
806	2017-09-27	18:30:00		37.38		73.4324	79.9474	81		36.9806	36.74	36.97
807	2017-09-27	19:00:00	90	37.1		74.027	81.2632	82.3333		36.9688	36.7775	36.9892
808	2017-09-27	19:30:00	78	37.1		74.3243	80.4211	81.9		36.9588	36.8242	37.0175
809	2017-09-27	20:00:00		36.99		73.8611	78.7222	80.7778		36.9494	36.8571	37.0458
810	2017-09-27	20:30:00		37.3		74.1143	77.8235	78.875		36.9488	36.9029	37.1
811	2017-09-27	21:00:00		37.33		74.3235	77.9375	78.5714		36.9483	36.9358	37.1475
812	2017-09-27	21:30:00		37.33		74.5758	78.7333	77.3333		36.946	36.9596	37.1875
813	2017-09-27	22:00:00	64	37.21		74.4242	77.8125	75.4286		36.9435	36.9642	37.2058
814	2017-09-27	22:30:00	60	36.99		74.2727	77.5	77.2857		36.939	36.9738	37.1875
815	2017-09-27	23:00:00	61	36.87		74.0606	76.625	72.2857		36.9319	36.9829	37.1592
816	2017-09-27	23:30:00		36.76		74.4688	77.0667	71.3333		36.9248	36.9921	37.1308
817	2017-09-28	00:00:00	120	36.76		76.0938	79.75	78.8333		36.92	36.9967	37.0933
818	2017-09-28	00:30:00		36.76		76.2903	80.1333	78.8333		36.9152	37.0058	37.0417
819	2017-09-28	01:00:00	57	36.87		76.0968	78.7333	73.3333		36.9081	37.0058	37.0225
820	2017-09-28	01:30:00	52	36.87		75.3438	77.0625	69		36.8998	37.0104	37.0033
821	2017-09-28	02:00:00	55	36.87		74.7273	74.75	67		36.8927	37.0196	36.9933
822	2017-09-28	02:30:00	51	36.99		74.0294	71.9375	65		36.8881	37.0338	36.9675
823	2017-09-28	03:00:00	66	36.99		73.8	71	65.1111		36.8835	37.0433	36.9392
824	2017-09-28	03:30:00	58	36.87		73.3611	69.25	64.4		36.8765	37.0442	36.9008
825	2017-09-28	04:00:00	48	36.87		72.8611	68	62.8		36.871	37.0392	36.8725
826	2017-09-28	04:30:00	47	36.76		72.1622	68	61.5		36.864	37.0204	36.8533
827	2017-09-28	05:00:00	65	36.43		72.2703	66.1765	61.9		36.8487	36.9879	36.8167
828	2017-09-28	05:30:00	79	36.2		72.6486	66.2353	63.4545		36.8277	36.9504	36.77
829	2017-09-28	06:00:00	150	35.98		75.1351	70.6471	66.1818		36.8067	36.8992	36.705
830	2017-09-28	06:30:00	73	36.09		75.4865	70.7778	66.75		36.7927	36.8454	36.6492
831	2017-09-28	07:00:00	74	36.2		75.7297	69.8889	68.1667		36.7927	36.8079	36.5933
832	2017-09-28	07:30:00	77	36.23		75.2703	69.8333	70.25		36.7979	36.7717	36.54
833	2017-09-28	08:00:00	81	36.09		74.4595	70.4211	72.4167		36.7956	36.7342	36.475
834	2017-09-28	08:30:00	72	36.2		73.8649	70.5	74.1667		36.7956	36.6883	36.4092
835	2017-09-28	09:00:00	82	36.43		74.027	71.0476	75.5		36.7933	36.6508	36.3625
836	2017-09-28	09:30:00	63	36.54		73.9459	70.6818	75.9167		36.7887	36.6179	36.335
837	2017-09-28	10:00:00	68	36.57		73.7895	70.8636	77.5833		36.7777	36.5913	36.31
838	2017-09-28	10:30:00		37.1		74.027	71.381	80.3636		36.7848	36.5958	36.3383
839	2017-09-28	11:00:00	72	37.1		73.9459	71.9048	81		36.7942	36.6054	36.3942
840	2017-09-28	11:30:00	78	36.87		74.1622	72.1818	80.9091		36.801	36.61	36.45
841	2017-09-28	12:00:00	78	36.99		74.2632	70.2727	74.3636		36.8081	36.6196	36.5342
842	2017-09-28	12:30:00	71	36.99		74.1842	70.3043	74.1818		36.8175	36.6292	36.6092
843	2017-09-28	13:00:00	48	36.87		73.3947	69.913	71.8182		36.8175	36.6292	36.665
844	2017-09-28	13:30:00	97	36.76		74	71.8696	73.6364		36.8175	36.6246	36.7092
845	2017-09-28	14:00:00	89	36.99		73.9231	73.3478	74.3636		36.8246	36.6296	36.7842
846	2017-09-28	14:30:00	36	37.1		72.3846	72.6957	71.0909		36.834	36.6342	36.8592
847	2017-09-28	15:00:00	101	37.18		72.8974	74.2174	72.8182		36.8427	36.6421	36.9217
848	2017-09-28	15:30:00	104	37.33		73.359	76.2174	76.5455		36.8527	36.6613	36.9875
849	2017-09-28	16:00:00	49	36.87		72.75	76.2609	74.8182		36.8502	36.6613	37.0125
850	2017-09-28	16:30:00	98	36.87		74.025	78.4783	76.75		36.8431	36.6658	36.9933
851	2017-09-28	17:00:00		36.87		73.4615	79.0909	77.1818		36.836	36.6842	36.9742
852	2017-09-28	17:30:00	85	37.02		73.641	79.3636	77.8182		36.8344	36.7183	36.9867
853	2017-09-28	18:00:00	65	37.44		73.3846	75.5	76.6364		36.8392	36.7792	37.0242
854	2017-09-28	18:30:00	111	37.38		74.325	77.2273	80.2727		36.8392	36.8329	37.0567
855	2017-09-28	19:00:00	62	37.24		73.625	76.6818	81.5455		36.8421	36.8763	37.0875
856	2017-09-28	19:30:00	60	37.1		73.175	75.9091	78.1818		36.8421	36.9125	37.1158
857	2017-09-28	20:00:00	64	36.99		72.9512	75.1364	75.9091		36.8421	36.95	37.1158
858	2017-09-28	20:30:00	63	37.1		72.7143	74.7273	78.3636		36.8379	36.9875	37.1158
859	2017-09-28	21:00:00	63	37.33		72.4884	73.8636	74.9091		36.8379	37.025	37.1283
860	2017-09-28	21:30:00	58	37.38		72.1591	73.6364	70.7273		36.839	37.06	37.1325
861	2017-09-28	22:00:00	63	37.33		72.1364	73.4091	72		36.8415	37.0917	37.1708
862	2017-09-28	22:30:00	66	37.33		72.2727	73.087	69.0909		36.8485	37.1013	37.2092
863	2017-09-28	23:00:00	70	37.21		72.4773	73	69.1667		36.8556	37.1058	37.2375
864	2017-09-28	23:30:00	64	37.21		72.2889	72.3913	67.4167		36.865	37.12	37.2533
865	2017-09-29	00:00:00	58	37.21		70.9111	71.5217	66.8333		36.8744	37.1292	37.2342
866	2017-09-29	00:30:00	57	37.21		70.6087	70.913	62.3333		36.8837	37.1383	37.22
867	2017-09-29	01:00:00	56	37.21		70.587	71.2609	61.8333		36.8908	37.1525	37.2175
868	2017-09-29	01:30:00	48	37.21		70.5	69.1304	60.8333		36.8979	37.1713	37.2267
869	2017-09-29	02:00:00	44	37.21		70.2609	67.1739	59.1667		36.905	37.1804	37.245
870	2017-09-29	02:30:00	53	37.21		70.3043	67.913	58.3333		36.9096	37.185	37.2542
871	2017-09-29	03:00:00	49	37.21		69.9348	65.6522	57.1667		36.9142	37.1863	37.2442
872	2017-09-29	03:30:00	48	37.1		69.7174	63.2174	56.3333		36.919	37.1767	37.2208
873	2017-09-29	04:00:00	53	36.99		69.8261	63.3913	55.5		36.9215	37.1817	37.1925
874	2017-09-29	04:30:00	45	36.65		69.7826	61.087	53.75		36.9192	37.1725	37.1358
875	2017-09-29	05:00:00	40	36.65		69.2391	60.2083	51.25		36.9238	37.1633	37.0892
876	2017-09-29	05:30:00	41	36.65		68.413	58.375	49.3333		36.9331	37.1479	37.0425
877	2017-09-29	06:00:00	27	35.87		65.7391	56.7917	46.75		36.9308	37.0825	36.9308
878	2017-09-29	06:30:00	78	35.42		65.8478	55.4167	48.5		36.9169	37.0008	36.7817
879	2017-09-29	07:00:00	131	35.37		67.087	58.2917	54.75		36.8996	36.9229	36.6283
880	2017-09-29	07:30:00	87	35.54		67.3043	59.4167	58		36.8852	36.8579	36.4892
881	2017-09-29	08:00:00	87	35.65		67.4348	60.375	61.5833		36.876	36.8021	36.3592
882	2017-09-29	08:30:00	67	35.65		67.3261	60.5417	62.75		36.8646	36.7417	36.2292
883	2017-09-29	09:00:00	60	36.09		66.8478	60.4167	63.6667		36.8575	36.69	36.1358
884	2017-09-29	09:30:00	60	36.31		66.7826	60.5	64.6667		36.8527	36.6454	36.07
885	2017-09-29	10:00:00	60	36.76		66.6087	60.375	65.25		36.8567	36.6217	36.0508
886	2017-09-29	10:30:00	70	36.54		66.6809	60.5417	67.3333		36.845	36.5887	36.0417
887	2017-09-29	11:00:00	65	36.76		66.5319	60.3333	69.4167		36.8379	36.57	36.0508
888	2017-09-29	11:30:00	76	36.76		66.4894	60.8333	72.3333		36.8356	36.5512	36.06
889	2017-09-29	12:00:00	76	36.87		66.4468	61.5833	76.4167		36.8331	36.5371	36.1433
890	2017-09-29	12:30:00	65	35.42		66.3191	61.9167	75.3333		36.8004	36.4625	36.1433
891	2017-09-29	13:00:00	60	36.87		66.5745	62.0833	69.4167		36.8004	36.4483	36.2683
892	2017-09-29	13:30:00	85	36.43		66.3191	63.625	69.25		36.7935	36.4158	36.3425
893	2017-09-29	14:00:00	97	36.31		66.4894	65.8333	70.0833		36.7794	36.3783	36.3975
894	2017-09-29	14:30:00	75	36.31		67.3191	66.75	70.75		36.7629	36.3408	36.4525
895	2017-09-29	15:00:00	29	36.43		65.7872	65.9167	68.1667		36.7473	36.3083	36.4808
896	2017-09-29	15:30:00	49	36.54		64.617	65.9583	67.25		36.7308	36.285	36.5
897	2017-09-29	16:00:00	100	36.76		65.7021	67.9167	70.5833		36.7285	36.2754	36.5
898	2017-09-29	16:30:00	46	36.65		64.5957	67.9583	68.5833		36.724	36.2754	36.5092
899	2017-09-29	17:00:00	48	36.54		64.25	68.2917	67.1667		36.7171	36.2708	36.4908
900	2017-09-29	17:30:00	83	36.65		64.2083	70.0417	67.75		36.7094	36.2708	36.4817
901	2017-09-29	18:00:00	74	36.76		64.3958	72	67.5833		36.6952	36.3079	36.4725
902	2017-09-29	18:30:00	62	37.21		63.375	71.3333	67.3333		36.6917	36.3825	36.6217
903	2017-09-29	19:00:00	72	36.87		63.5833	68.875	68.3333		36.684	36.445	36.6217
904	2017-09-29	19:30:00	67	37.21		63.7292	68.0417	66.8333		36.6862	36.5146	36.6867
905	2017-09-29	20:00:00	58	37.33		63.6042	66.8333	63.5833		36.6933	36.5846	36.7717
906	2017-09-29	20:30:00	56	37.1		63.4583	66.375	62		36.6933	36.645	36.8375
907	2017-09-29	21:00:00	56	36.87		63.3125	66.2083	64.25		36.6837	36.6775	36.8742
908	2017-09-29	21:30:00	54	36.76		63.2292	65.9583	64.6667		36.6708	36.6963	36.8925
909	2017-09-29	22:00:00	55	36.76		63.0625	65.75	60.9167		36.659	36.6963	36.8925
910	2017-09-29	22:30:00	56	36.76		62.8542	65.1667	61.75		36.6471	36.7054	36.9017
911	2017-09-29	23:00:00	119	36.99		63.875	67.4167	67.6667		36.6425	36.715	36.9392
912	2017-09-29	23:30:00	56	37.1		63.7083	66.5833	65.4167		36.6402	36.7292	36.9767
913	2017-09-30	00:00:00	120	37.1		65	68.4167	69.25		36.6379	36.7388	37.005
914	2017-09-30	00:30:00	55	37.1		64.9583	68	68.6667		36.6356	36.8088	36.9958
915	2017-09-30	01:00:00	56	37.18		64.9583	67.8333	67.3333		36.635	36.8217	37.0217
916	2017-09-30	01:30:00	64	37.1		65.2917	66.9583	67.0833		36.6327	36.8496	37.0125
917	2017-09-30	02:00:00	67	37.02		65.7708	65.7083	67.8333		36.6287	36.8792	36.9867
918	2017-09-30	02:30:00	56	36.99		65.8333	64.9167	67.8333		36.6242	36.9075	36.9775
919	2017-09-30	03:00:00	78	36.99		66.4375	66.9583	69.6667		36.6196	36.9308	36.9875
920	2017-09-30	03:30:00	45	36.99		66.375	66.7917	68.9167		36.6173	36.9496	37.0067
921	2017-09-30	04:00:00	44	36.99		66.1875	64.4583	68		36.6173	36.9592	37.0258
922	2017-09-30	04:30:00	41	36.87		66.1042	64.25	66.75		36.6219	36.9683	37.035
923	2017-09-30	05:00:00	60	36.87		66.5208	64.75	61.8333		36.6265	36.9821	37.025
924	2017-09-30	05:30:00	35	36.65		66.3958	62.75	60.0833		36.6265	36.9821	36.9875
925	2017-09-30	06:00:00	67	36.54		67.2292	62.4583	55.6667		36.6404	36.9729	36.9408
926	2017-09-30	06:30:00	49	35.54		66.625	61.9167	55.1667		36.6429	36.9033	36.8108
927	2017-09-30	07:00:00	81	35.2		65.5833	62.2917	57.25		36.6394	36.8338	36.6458
928	2017-09-30	07:30:00	71	35.31		65.25	62.4583	57.8333		36.6346	36.7546	36.4967
929	2017-09-30	08:00:00	77	35.65		65.0417	63.25	58.6667		36.6346	36.6846	36.3825
930	2017-09-30	08:30:00	74	35.54		65.1875	64	60.1667		36.6323	36.6196	36.2617
931	2017-09-30	09:00:00	75	36.09		65.5	64.7917	59.9167		36.6323	36.5871	36.1867
932	2017-09-30	09:30:00	69	36.2		65.6875	65.4167	61.9167		36.63	36.5637	36.1208
933	2017-09-30	10:00:00	52	36.65		65.5208	65.2917	62.5833		36.6277	36.5592	36.0925
934	2017-09-30	10:30:00	65	36.43		65.4167	65.6667	64.5833		36.6254	36.5454	36.0558
935	2017-09-30	11:00:00	72	36.54		65.5625	63.7083	65.5833		36.6208	36.5267	36.0283
936	2017-09-30	11:30:00	63	36.65		65.2917	64	67.9167		36.6185	36.5079	36.0283
937	2017-09-30	12:00:00	60	36.99		64.9583	61.5	67.3333		36.621	36.5033	36.0658
938	2017-09-30	12:30:00	60	36.87		64.8542	61.7083	68.25		36.6512	36.4937	36.1767
939	2017-09-30	13:00:00	78	36.76		65.2292	62.625	68		36.649	36.4763	36.3067
940	2017-09-30	13:30:00	62	36.43		64.75	62.5417	67.25		36.649	36.4483	36.4
941	2017-09-30	14:00:00	96	36.31		64.7292	63.75	68.8333		36.649	36.4187	36.455
942	2017-09-30	14:30:00	48	36.31		64.1667	63.4167	66.6667		36.649	36.3904	36.5192
943	2017-09-30	15:00:00	102	36.43		65.6875	64.4167	68.9167		36.649	36.3671	36.5475
944	2017-09-30	15:30:00	92	36.65		66.5833	66.375	70.8333		36.6513	36.3529	36.585
945	2017-09-30	16:00:00	90	36.65		66.375	68.2917	74		36.649	36.3387	36.585
946	2017-09-30	16:30:00	105	36.87		67.6042	70.9583	77.3333		36.6535	36.3387	36.6217
947	2017-09-30	17:00:00	88	36.76		68.4375	72.125	78.6667		36.6581	36.3342	36.64
948	2017-09-30	17:30:00	192	37.07		70.7083	78.6667	89.4167		36.6669	36.3517	36.675
949	2017-09-30	18:00:00		37.21		70.6383	79.1739	92.0909		36.6763	36.3796	36.6933
950	2017-09-30	18:30:00	58	37.21		70.5532	79.5652	91.9091		36.6763	36.4492	36.7217
951	2017-09-30	19:00:00	64	37.18		70.383	78.8261	90.6364		36.6827	36.5317	36.7567
952	2017-09-30	19:30:00		36.99		70.4565	79.1818	93.5		36.6781	36.6017	36.8033
953	2017-09-30	20:00:00	52	37.1		70.3261	78.0455	89.1		36.6733	36.6621	36.8692
954	2017-09-30	20:30:00	64	36.99		70.5	77.5909	90.7		36.671	36.7225	36.9258
955	2017-09-30	21:00:00	159	36.87		72.7391	81.4091	96.4		36.671	36.755	36.9625
956	2017-09-30	21:30:00	64	36.87		72.9565	81.1818	93.6		36.6733	36.7829	36.9808
957	2017-09-30	22:00:00	58	36.99		73.0217	81.4545	90.4		36.6781	36.7971	37.0092
958	2017-09-30	22:30:00	136	36.99		74.7609	84.6818	93.5		36.6829	36.8204	37.0192
959	2017-09-30	23:00:00	54	36.99		73.3478	83.8636	90.1		36.6829	36.8392	37.0383
960	2017-09-30	23:30:00	55	36.99		73.3261	83.5	76.4		36.6806	36.8533	37.0317
961	2017-10-01	00:00:00	67	36.99		72.1739	83.8182	75.5455		36.6783	36.8533	37.0133
962	2017-10-01	00:30:00	56	36.99		72.1957	83.6364	75.3636		36.676	36.8583	36.995
963	2017-10-01	01:00:00	68	36.87		72.4565	83.1818	75.7273		36.6696	36.8629	36.9692
964	2017-10-01	01:30:00	55	36.99		72.2609	82.8636	74		36.6673	36.8863	36.9692
965	2017-10-01	02:00:00	56	36.99		72.0217	81.0455	74.3333		36.6667	36.9146	36.96
966	2017-10-01	02:30:00	71	36.87		72.3478	82.0909	74.9167		36.6642	36.9379	36.95
967	2017-10-01	03:00:00	53	36.76		71.8043	79.8636	66.0833		36.6594	36.9517	36.9408
968	2017-10-01	03:30:00	68	36.76		72.3043	78.7727	66.4167		36.6546	36.9563	36.9317
969	2017-10-01	04:00:00	52	36.62		72.4783	77.0455	65.9167		36.6469	36.955	36.9008
970	2017-10-01	04:30:00	58	36.65		72.8478	74.9091	59.4167		36.6423	36.9458	36.8725
971	2017-10-01	05:00:00	39	36.65		72.3913	72.6818	58.1667		36.6377	36.9413	36.8442
972	2017-10-01	05:30:00	41	36.65		72.5217	65.8182	57		36.6377	36.9237	36.8158
973	2017-10-01	06:00:00		35.76		72.6444	65.8182	56.0909		36.6215	36.8633	36.7133
974	2017-10-01	06:30:00	67	34.98		73.0444	66.2273	57.0909		36.6098	36.7704	36.5458
975	2017-10-01	07:00:00	150	34.9		74.5778	70.1364	64.5455		36.6035	36.6754	36.3817
976	2017-10-01	07:30:00	41	35.09		73.9111	68.8696	63.2727		36.599	36.5962	36.2233
977	2017-10-01	08:00:00	22	35.2		72.6889	67.5652	60.1818		36.5896	36.5171	36.0742
978	2017-10-01	08:30:00		35.31		72.6591	67.7273	59.1		36.5848	36.4471	35.9442
979	2017-10-01	09:00:00		35.42		72.6047	63.381	59.7778		36.5708	36.3867	35.8325
980	2017-10-01	09:30:00	78	35.87		72.814	64.0476	60.8889		36.564	36.345	35.7583
981	2017-10-01	10:00:00	61	36.09		73.0233	64.1905	61.8889		36.5523	36.3075	35.7142
982	2017-10-01	10:30:00	70	36.09		73.1395	61.0476	63.2222		36.5452	36.27	35.6675
983	2017-10-01	11:00:00	82	36.2		73.3721	62.381	68		36.5381	36.2371	35.63
984	2017-10-01	11:30:00	96	36.2		74.1395	64.3333	74.1111		36.5287	36.2042	35.5925
985	2017-10-01	12:00:00		35.98		74.4762	64.2	74.1111		36.5077	36.1621	35.6108
986	2017-10-01	12:30:00	32	35.98		73.8095	63	70.2222		36.4892	36.12	35.6942
987	2017-10-01	13:00:00		35.09		73.7073	62.7368	60.25		36.4544	36.0458	35.71
988	2017-10-01	13:30:00	51	36.54		73.439	62.5263	61.5		36.4567	36.0271	35.8308
989	2017-10-01	14:00:00	90	36.2		73.2927	64.3158	70		36.4544	35.9942	35.9142
990	2017-10-01	14:30:00	84	36.54		74.1707	65	71.5556		36.4592	35.9804	36.0167
991	2017-10-01	15:00:00	47	36.54		72.8293	64.6842	69.1		36.4615	35.9713	36.11
992	2017-10-01	15:30:00	55	36.54		71.9268	64	66.8		36.4592	35.9621	36.1658
993	2017-10-01	16:00:00	65	36.54		71.3171	64.6842	67.2		36.4569	35.9588	36.2033
994	2017-10-01	16:30:00	93	36.65		71.0244	66.5263	69.5		36.4523	35.9588	36.25
995	2017-10-01	17:00:00	81	36.54		70.8537	68.7368	69.4		36.4477	35.9542	36.2783
996	2017-10-01	17:30:00	74	36.76		67.9756	70.4737	67.2		36.4412	35.9587	36.325
997	2017-10-01	18:00:00		36.99		67.9756	70.4737	67.2		36.4367	36.01	36.4092
998	2017-10-01	18:30:00	53	36.99		67.8537	69.7368	69.3		36.4321	36.0937	36.4933
999	2017-10-01	19:00:00	187	36.76		70.8537	71.6842	80		36.4233	36.1712	36.6325
1000	2017-10-01	19:30:00	59	36.99		70.5714	72.6316	80.7273		36.4233	36.2504	36.67
1001	2017-10-01	20:00:00		36.99		71.0244	75.4444	79.8		36.421	36.325	36.7358
1002	2017-10-01	20:30:00	54	36.76		70.7805	74.3158	76.8		36.4162	36.3854	36.7542
1003	2017-10-01	21:00:00		36.54		68.575	74.3158	80.1111		36.4094	36.4321	36.7542
1004	2017-10-01	21:30:00	56	36.54		68.375	73.1579	80.2222		36.4025	36.46	36.7542
1005	2017-10-01	22:00:00	61	36.87		68.45	73.1579	79.7778		36.4	36.4925	36.7817
1006	2017-10-01	22:30:00	55	36.99		66.425	72.3684	75.5556		36.4	36.53	36.81
1007	2017-10-01	23:00:00	53	37.1		66.4	70.8421	72.4444		36.4023	36.5675	36.8567
1008	2017-10-01	23:30:00	58	37.21		66.475	68.8421	70.6667		36.4069	36.6096	36.8942
1009	2017-10-02	00:00:00	57	37.21		66.225	68.25	69.3		36.4115	36.6608	36.9125
1010	2017-10-02	00:30:00	52	36.87		66.125	69.25	69.2		36.409	36.6979	36.9025
1011	2017-10-02	01:00:00	50	36.54		65.675	68.3333	55.5		36.4021	36.7583	36.8842
1012	2017-10-02	01:30:00	48	36.31		65.5	68.1905	54.4		36.3879	36.7488	36.8275
1013	2017-10-02	02:00:00	100	36.43		66.6	68.6667	58.5455		36.3762	36.7583	36.7808
1014	2017-10-02	02:30:00	50	36.43		66.075	67.0476	58.1818		36.3671	36.7537	36.7533
1015	2017-10-02	03:00:00	52	36.43		66.05	67.2857	57.6667		36.3602	36.7492	36.7442
1016	2017-10-02	03:30:00	49	36.43		65.575	67	57.0833		36.3533	36.7446	36.735
1017	2017-10-02	04:00:00	45	36.43		65.4	66.0476	55.75		36.3494	36.74	36.6983
1018	2017-10-02	04:30:00	44	36.43		65.05	63.7143	54.8333		36.3448	36.7308	36.6517
1019	2017-10-02	05:00:00	76	36.34		65.975	63.4762	56.75		36.3383	36.7225	36.5883
1020	2017-10-02	05:30:00	47	36.31		66.125	62.1905	55.8333		36.3312	36.7037	36.5133
1021	2017-10-02	06:00:00	71	36.2		66.2439	62.5909	57		36.3404	36.6708	36.4292
1022	2017-10-02	06:30:00	71	35.31		66.3415	63.4091	58.5833		36.3473	36.6008	36.2992
1023	2017-10-02	07:00:00	86	35.09		64.7805	58.8182	61.5833		36.3512	36.5312	36.1783
1024	2017-10-02	07:30:00	93	35.2		66.0488	60.3636	65.3333		36.3535	36.4567	36.0858
1025	2017-10-02	08:00:00	47	35.42		66.6585	59.7826	60.9167		36.3581	36.3912	36.0017
1026	2017-10-02	08:30:00	67	35.54		66.6667	60.3478	62.3333		36.3629	36.3404	35.9275
1027	2017-10-02	09:00:00	82	35.76		67.0233	61.25	64.8333		36.37	36.3079	35.8717
1028	2017-10-02	09:30:00	42	35.54		66.186	60.6667	64.25		36.3631	36.2663	35.7975
1029	2017-10-02	10:00:00	153	35.42		68.3256	64.5	73.25		36.3492	36.2058	35.7133
1030	2017-10-02	10:30:00	92	35.54		68.8372	66.0417	77.25		36.3377	36.1454	35.6392
1031	2017-10-02	11:00:00	65	35.65		68.4419	66.5417	76.3333		36.3263	36.085	35.5817
1032	2017-10-02	11:30:00	197	35.65		70.7907	72.3333	88.8333		36.3148	36.02	35.5267
1033	2017-10-02	12:00:00	65	35.98		70.6591	72.6667	88.3333		36.3148	35.9687	35.5083
1034	2017-10-02	12:30:00	87	36.2		71.9091	74.125	89.6667		36.3194	35.9408	35.5825
1035	2017-10-02	13:00:00	84	36.65		72.1778	75.5417	89.5		36.3519	35.9454	35.7125
1036	2017-10-02	13:30:00	83	37.1		72.8889	77	88.6667		36.3635	35.9783	35.8708
1037	2017-10-02	14:00:00	48	37.1		71.9556	74.8333	88.75		36.3823	36.0063	36.0108
1038	2017-10-02	14:30:00	87	36.87		72.0222	76.375	90.4167		36.3892	36.0246	36.1217
1039	2017-10-02	15:00:00	91	36.99		73	78	91.1667		36.3985	36.0479	36.2242
1040	2017-10-02	15:30:00	78	36.76		73.5111	79.2083	94.1667		36.4031	36.0617	36.3258
1041	2017-10-02	16:00:00	166	36.87		75.7556	84.25	95.25		36.41	36.08	36.4467
1042	2017-10-02	16:30:00	79	36.65		75.4444	85.7083	94.1667		36.41	36.0892	36.5392
1043	2017-10-02	17:00:00	75	36.99		75.3111	85.6667	95		36.4194	36.1163	36.6508
1044	2017-10-02	17:30:00	84	37.1		75.5333	87.2083	85.5833		36.4265	36.1492	36.7717
1045	2017-10-02	18:00:00	65	37.33		75.3043	86.9583	85.5833		36.4335	36.1962	36.8842
1046	2017-10-02	18:30:00	82	37.33		75.9348	87.4167	85.1667		36.4406	36.2804	36.9783
1047	2017-10-02	19:00:00	65	37.16		73.2826	86.5417	83.5833		36.449	36.3667	37.0208
1048	2017-10-02	19:30:00	69	37.1		73.5	85.5417	82.4167		36.4512	36.4458	37.0208
1049	2017-10-02	20:00:00	81	37.1		73.6596	86.9583	85.1667		36.4535	36.5158	37.0208
1050	2017-10-02	20:30:00	159	36.76		75.8936	90.7917	91.1667		36.4535	36.5667	37.0117
1051	2017-10-02	21:00:00	122	37.1		76.8542	92.4583	93.75		36.4652	36.6225	37.0208
1052	2017-10-02	21:30:00	83	36.99		77.4167	94.1667	94.1667		36.4746	36.6829	37.04
1053	2017-10-02	22:00:00	76	37.33		77.7292	90.9583	86.6667		36.4842	36.7625	37.0783
1054	2017-10-02	22:30:00	65	37.21		77.9375	89.8333	85.5		36.4887	36.8321	37.125
1055	2017-10-02	23:00:00	105	36.99		79.0208	91.5	88		36.4865	36.8879	37.125
1056	2017-10-02	23:30:00	65	37.33		79.1667	86	86.4167		36.489	36.9579	37.1442
1057	2017-10-03	00:00:00		37.33		79.6383	86.913	88.3636		36.4915	37.0142	37.1442
1058	2017-10-03	00:30:00	47	37.33		79.5319	85.1739	85.1818		36.501	37.0613	37.1442
1059	2017-10-03	01:00:00		37.21		80.1739	85.2273	87.2		36.515	37.0846	37.1483
1060	2017-10-03	01:30:00		37.21		80.8889	85.3333	89.2222		36.5337	37.0892	37.1575
1061	2017-10-03	02:00:00	61	37.1		80.0222	85.9524	87		36.5477	37.0892	37.1575
1062	2017-10-03	02:30:00	63	37.1		80.3111	84.8095	76.3333		36.5617	37.0988	37.1858
1063	2017-10-03	03:00:00	75	37.1		80.8222	84.0476	71.1111		36.5756	37.1033	37.1858
1064	2017-10-03	03:30:00	66	37.1		81.2	83.4762	69.2222		36.5896	37.1175	37.195
1065	2017-10-03	04:00:00	75	36.99		81.8667	79.1429	69.1111		36.6012	37.1225	37.1667
1066	2017-10-03	04:30:00	76	36.87		82.5778	79	70.3333		36.6104	37.1317	37.1383
1067	2017-10-03	05:00:00	55	36.54		82.1111	78.0476	64.7778		36.6146	37.1129	37.1008
1068	2017-10-03	05:30:00	56	36.31		82.3111	76.7143	63.7778		36.6146	37.08	37.0158
1069	2017-10-03	06:00:00	50	36.4		81.8444	76	62.4		36.6187	37.0412	36.9383
1070	2017-10-03	06:30:00		35.87		82.0909	75.7	64.1111		36.6304	36.9804	36.8167
1071	2017-10-03	07:00:00	55	35.65		81.3864	75.2	63.2		36.6421	36.9175	36.6867
1072	2017-10-03	07:30:00	47	35.76		80.3409	74.1	61.7273		36.6537	36.8617	36.5658
1073	2017-10-03	08:00:00	22	35.98		79.7727	71.15	58.1818		36.6654	36.815	36.4725
1074	2017-10-03	08:30:00	68	35.98		79.7955	66.6	58.6364		36.6746	36.7825	36.3792
1075	2017-10-03	09:00:00	144	35.76		81.2045	67.7	64.9091		36.6746	36.7267	36.2675
1076	2017-10-03	09:30:00	53	35.76		81.4545	66.2	63.7273		36.6792	36.6754	36.1558
1077	2017-10-03	10:00:00		35.87		79.7907	65.6842	62.6		36.6885	36.6146	36.0625
1078	2017-10-03	10:30:00	44	35.9		78.6744	64.5789	59.4		36.696	36.56	35.9817
1079	2017-10-03	11:00:00	182	35.98		81.3953	68.6316	72.1		36.7029	36.5179	35.935
1080	2017-10-03	11:30:00	72	36.31		78.4884	69	73.7		36.7167	36.4754	35.935
1081	2017-10-03	12:00:00	79	36.54		78.814	69.5	76.6		36.7283	36.4425	35.9467
1082	2017-10-03	12:30:00	136	36.99		79.9535	73.95	82		36.7448	36.4283	36.04
1083	2017-10-03	13:00:00	85	37.1		79.9767	74.4762	84.7273		36.7542	36.4237	36.1608
1084	2017-10-03	13:30:00	63	37.55		79.5116	73.9545	86.1818		36.7635	36.4379	36.31
1085	2017-10-03	14:00:00	75	37.1		80.1395	74.5909	91		36.7635	36.4379	36.4033
1086	2017-10-03	14:30:00	141	37.13		81.3953	78.1364	97.6364		36.769	36.4392	36.4992
1087	2017-10-03	15:00:00	78	37.1		81.093	78.2727	91.6364		36.7713	36.4392	36.6108
1088	2017-10-03	15:30:00	87	37.1		81.3023	79.2273	94.7273		36.7783	36.4392	36.7225
1089	2017-10-03	16:00:00	86	37.21		79.4419	79.7273	94		36.7854	36.4483	36.8342
1090	2017-10-03	16:30:00	94	37.33		79.7907	80.5455	98.1667		36.7996	36.4675	36.9533
1091	2017-10-03	17:00:00	94	37.44		80.2326	82.3182	90.8333		36.809	36.505	37.075
1092	2017-10-03	17:30:00	81	37.55		80.1628	83.4545	91.5833		36.8183	36.5567	37.1783
1093	2017-10-03	18:00:00	75	37.55		80.3953	84.5909	91.25		36.8229	36.6046	37.2625
1094	2017-10-03	18:30:00	73	37.55		80.186	84.087	86		36.8275	36.6746	37.3092
1095	2017-10-03	19:00:00	66	37.55		80.2093	84.5652	84.4167		36.8356	36.7538	37.3467
1096	2017-10-03	19:30:00	75	37.55		80.3488	85.7826	85.4167		36.845	36.8283	37.3467
1097	2017-10-03	20:00:00	89	37.44		80.5349	88.6957	86.5833		36.8521	36.8892	37.375
1098	2017-10-03	20:30:00	96	37.5		79.0698	89.913	82.8333		36.8675	36.9525	37.4058
1099	2017-10-03	21:00:00		37.44		78.0476	87.4545	83.2727		36.8746	37.0225	37.4342
1100	2017-10-03	21:30:00	83	36.99		78.0476	88.8182	82.9091		36.8746	37.0737	37.425
1101	2017-10-03	22:00:00	75	37.1		78.0238	88.2174	81.9091		36.8698	37.125	37.4158
1102	2017-10-03	22:30:00	78	37.1		78.3333	89.6957	80.4545		36.8675	37.175	37.3967
1103	2017-10-03	23:00:00	62	36.99		77.3095	84.4783	77.5455		36.8675	37.2171	37.3592
1104	2017-10-03	23:30:00	61	36.99		77.2143	84	75.7273		36.8604	37.2454	37.3125
1105	2017-10-04	00:00:00	70	36.76		77.0465	83.6087	75.2727		36.8485	37.2546	37.2467
1106	2017-10-04	00:30:00	57	36.65		77.2791	80.1739	73.8182		36.8344	37.2404	37.1717
1107	2017-10-04	01:00:00	46	36.43		76.5682	78.4783	72		36.8181	37.2125	37.0783
1108	2017-10-04	01:30:00	58	36.65		76.1556	78.2609	70.4545		36.8065	37.175	37.0033
1109	2017-10-04	02:00:00	60	36.76		76.1333	77.6087	67.8182		36.7994	37.1608	36.9467
1110	2017-10-04	02:30:00	59	36.76		76.0444	74.0435	64.4545		36.7923	37.1454	36.885
1111	2017-10-04	03:00:00	63	36.65		75.7778	73.3913	64.3333		36.7829	37.1267	36.8192
1112	2017-10-04	03:30:00	57	36.76		75.5778	72.087	62.1667		36.7758	37.1125	36.8
1113	2017-10-04	04:00:00	61	36.65		75.2667	71	61		36.7688	37.0892	36.7625
1114	2017-10-04	04:30:00	58	36.65		74.8667	69.4348	59.3333		36.7642	37.0608	36.725
1115	2017-10-04	05:00:00	55	36.76		74.8667	67.7391	58.75		36.7688	37.0325	36.7058
1116	2017-10-04	05:30:00	53	36.76		74.8	66.5217	58.0833		36.7781	36.9996	36.6867
1117	2017-10-04	06:00:00	62	36.76		75.0667	65.9565	57.4167		36.7856	36.9667	36.6867
1118	2017-10-04	06:30:00		35.87		75.0667	65.6364	57.4545		36.7856	36.8967	36.6217
1119	2017-10-04	07:00:00	88	35.76		75.8	66.6364	61.2727		36.7879	36.8221	36.5658
1120	2017-10-04	07:30:00	70	35.79		76.3111	66.4091	62.3636		36.7885	36.7487	36.4942
1121	2017-10-04	08:00:00	83	35.98		77.6667	66.1364	64.4545		36.7885	36.6879	36.4292
1122	2017-10-04	08:30:00	59	35.98		77.4667	64.4545	64.4545		36.7885	36.6246	36.3642
1123	2017-10-04	09:00:00	77	35.87		75.9778	65	65.7273		36.7908	36.5592	36.2992
1124	2017-10-04	09:30:00		36.31		76.5	64.1818	66.6		36.8023	36.5308	36.2617
1125	2017-10-04	10:00:00	68	36.31		76.3111	63.8636	67.3		36.8115	36.4979	36.2333
1126	2017-10-04	10:30:00	83	36.31		77.1778	64.0909	69.8		36.82	36.465	36.205
1127	2017-10-04	11:00:00	67	36.65		74.6222	64.3182	71		36.834	36.4508	36.1958
1128	2017-10-04	11:30:00	62	36.87		74.4	64.3636	71.9		36.8456	36.4458	36.205
1129	2017-10-04	12:00:00	81	36.76		74.4444	64.8636	73.8		36.8502	36.4458	36.205
1130	2017-10-04	12:30:00	85	36.87		73.3111	66.1364	74.8182		36.8477	36.455	36.2883
1131	2017-10-04	13:00:00	44	36.65		72.4	66.0455	70.8182		36.8383	36.4642	36.3625
1132	2017-10-04	13:30:00	49	36.54		72.0889	65.6364	68.9091		36.8173	36.4596	36.425
1133	2017-10-04	14:00:00	21	36.65		70.8889	63.8636	63.2727		36.8079	36.455	36.4808
1134	2017-10-04	14:30:00	49	36.73		68.8444	63.4091	62.3636		36.7996	36.4537	36.5433
1135	2017-10-04	15:00:00		36.76		68.6364	63.4286	60.9		36.7925	36.4583	36.6175
1136	2017-10-04	15:30:00	77	36.76		68.4091	64.381	62.3636		36.7854	36.4583	36.655
1137	2017-10-04	16:00:00	104	36.76		68.8182	66.4286	65.6364		36.776	36.4629	36.6925
1138	2017-10-04	16:30:00	38	36.76		67.5455	65.4762	61.5455		36.7642	36.4675	36.73
1139	2017-10-04	17:00:00	90	36.65		67.4545	67.1429	63.6364		36.7477	36.4629	36.73
1140	2017-10-04	17:30:00	83	36.99		67.5	68.5714	65.5455		36.736	36.4725	36.74
1141	2017-10-04	18:00:00	82	37.44		67.6591	69.5238	65.6364		36.7337	36.5008	36.7967
1142	2017-10-04	18:30:00	64	37.44		67.4545	69.2727	63.7273		36.7315	36.5662	36.8442
1143	2017-10-04	19:00:00	61	37.44		67.3409	68.0455	65.2727		36.7292	36.6362	36.91
1144	2017-10-04	19:30:00	79	37.41		67.4318	68.4545	68		36.7263	36.7037	36.9825
1145	2017-10-04	20:00:00	58	37.44		66.7273	67.3182	71.3636		36.7263	36.7646	37.0483
1146	2017-10-04	20:30:00	64	37.21		66	67.5455	72.7273		36.7202	36.8158	37.0883
1147	2017-10-04	21:00:00		37.21		66	67.0952	72.7273		36.7154	36.8717	37.1258
1148	2017-10-04	21:30:00	66	37.21		65.6136	67.0455	71.7273		36.72	36.9092	37.1633
1149	2017-10-04	22:00:00	69	37.21		65.4773	67.0909	68.5455		36.7223	36.9467	37.2008
1150	2017-10-04	22:30:00	65	37.33		65.1818	66.2727	71		36.7271	36.9892	37.2483
1151	2017-10-04	23:00:00	63	37.33		65.2045	66.0909	68.5455		36.7342	37.0175	37.305
1152	2017-10-04	23:30:00	65	37.33		65.2955	66.2273	66.9091		36.7413	37.0367	37.3333
1153	2017-10-05	00:00:00	58	37.44		65.0227	65.1818	64.7273		36.7554	37.065	37.3333
1154	2017-10-05	00:30:00	55	37.44		64.9773	63.8182	63.9091		36.7719	37.0888	37.3333
1155	2017-10-05	01:00:00	66	37.33		65.4318	64.8182	64.3636		36.7906	37.1171	37.3242
1156	2017-10-05	01:30:00	49	37.21		65.2273	64.8182	61.6364		36.8023	37.145	37.3075
1157	2017-10-05	02:00:00	54	37.13		65.0909	66.3182	61.2727		36.81	37.165	37.2817
1158	2017-10-05	02:30:00	58	37.1		65.0682	66.7273	60.7273		36.8171	37.1804	37.2725
1159	2017-10-05	03:00:00	61	36.99		65.0227	66.4783	60.75		36.8242	37.19	37.2542
1160	2017-10-05	03:30:00	46	36.87		64.7727	65.1304	59.0833		36.8265	37.1946	37.2258
1161	2017-10-05	04:00:00	50	36.76		64.5227	62.7826	57.5		36.8287	37.1946	37.1883
1162	2017-10-05	04:30:00	38	36.76		64.0682	62.7826	55.25		36.831	37.1946	37.1408
1163	2017-10-05	05:00:00	43	36.65		63.7955	60.7391	53.5833		36.8287	37.1946	37.0842
1164	2017-10-05	05:30:00	64	36.31		64.0455	59.913	53.5		36.8194	37.1662	36.9992
1165	2017-10-05	06:00:00	52	35.31		63.8182	58.6087	53		36.7892	37.0775	36.8217
1166	2017-10-05	06:30:00	53	35.09		63.5778	58.1304	52.8333		36.7729	36.9796	36.6258
1167	2017-10-05	07:00:00	68	35.09		63.1333	58.4348	53		36.759	36.8817	36.4392
1168	2017-10-05	07:30:00	76	35.2		63.2667	58.3043	55.25		36.7467	36.7896	36.2717
1169	2017-10-05	08:00:00	111	35.2		63.8889	60.6087	60		36.7304	36.6962	36.1108
1170	2017-10-05	08:30:00	23	35.42		63.0889	58.8261	57.0833		36.7187	36.6217	35.9708
1171	2017-10-05	09:00:00	86	35.54		63.2889	59.9583	59.1667		36.7119	36.5521	35.85
1172	2017-10-05	09:30:00	70	36.06		63.4348	60.125	61.1667		36.7067	36.5042	35.7825
1173	2017-10-05	10:00:00	77	36.31		63.6304	60.4583	63.4167		36.7067	36.4667	35.745
1174	2017-10-05	10:30:00	60	36.43		63.1304	60.25	65.25		36.7092	36.4292	35.7175
1175	2017-10-05	11:00:00	79	36.65		63.3913	60.9167	68.25		36.7092	36.4008	35.7175
1176	2017-10-05	11:30:00	76	36.76		63.6957	61.375	69.25		36.7069	36.3771	35.755
1177	2017-10-05	12:00:00	65	34.98		63.3478	61.6667	70.3333		36.6698	36.2746	35.7275
1178	2017-10-05	12:30:00	63	36.76		62.8696	62	71.1667		36.6675	36.2462	35.8667
1179	2017-10-05	13:00:00	90	36.54		63.8696	63	73		36.6652	36.2133	35.9875
1180	2017-10-05	13:30:00	46	36.31		63.8043	62.875	70.5		36.6604	36.1758	36.08
1181	2017-10-05	14:00:00	36	36.43		64.1304	62.125	64.25		36.6558	36.1467	36.1825
1182	2017-10-05	14:30:00	133	36.43		65.9565	65.25	73.4167		36.6496	36.1187	36.2667
1183	2017-10-05	15:00:00	51	36.54		65.6383	64.8333	70.5		36.645	36.1	36.35
1184	2017-10-05	15:30:00	178	36.65		67.7872	70.3333	79.5		36.6427	36.0908	36.3992
1185	2017-10-05	16:00:00	49	36.76		66.617	70.2917	77.1667		36.6427	36.0908	36.4367
1186	2017-10-05	16:30:00	107	36.76		68.0851	73.1667	81.0833		36.6427	36.0908	36.4642
1187	2017-10-05	17:00:00	72	36.65		67.7021	74.375	80.5		36.6427	36.0908	36.4642
1188	2017-10-05	17:30:00	74	37.1		67.5106	74.7917	80.3333		36.645	36.1237	36.4925
1189	2017-10-05	18:00:00	75	37.33		67.3617	75.75	81.1667		36.6427	36.2079	36.6883
1190	2017-10-05	18:30:00	67	37.21		67.4255	76.3333	81.5		36.6379	36.2962	36.7258
1191	2017-10-05	19:00:00	96	37.1		68.1702	77.5	82		36.6308	36.38	36.7725
1192	2017-10-05	19:30:00	65	37.33		67.8723	77.0417	83.5833		36.6292	36.4688	36.8575
1193	2017-10-05	20:00:00	64	37.35		68	75.0833	85.9167		36.6273	36.5583	36.9342
1194	2017-10-05	20:30:00	63	37.44		67.9787	76.75	80.0833		36.6321	36.6425	37.0183
1195	2017-10-05	21:00:00	60	37.44		67.8125	75.6667	80.8333		36.6369	36.7217	37.0933
1196	2017-10-05	21:30:00	61	37.44		67.7083	75.2917	71.0833		36.6417	36.7792	37.1592
1197	2017-10-05	22:00:00	57	37.44		67.4583	74.4583	71.75		36.6465	36.8263	37.2158
1198	2017-10-05	22:30:00	76	37.33		67.6875	75.125	69.1667		36.6465	36.8638	37.2633
1199	2017-10-05	23:00:00	57	37.21		67.5625	74.2083	67.9167		36.644	36.8871	37.31
1200	2017-10-05	23:30:00	61	37.21		67.4792	73.5833	66.8333		36.6415	36.9058	37.3192
1201	2017-10-06	00:00:00	61	37.1		67.5417	73.4167	65.6667		36.6344	36.9942	37.3
1202	2017-10-06	00:30:00	61	37.1		67.6667	73.3333	65.1667		36.6273	37.0083	37.2908
1203	2017-10-06	01:00:00	67	37.1		67.6875	72.375	62.75		36.6225	37.0317	37.2908
1204	2017-10-06	01:30:00	57	37.16		67.8542	72.8333	62.0833		36.6215	37.0671	37.2767
1205	2017-10-06	02:00:00	58	37.1		67.9375	73.75	61.5833		36.6208	37.095	37.2558
1206	2017-10-06	02:30:00	54	37.07		67.8542	70.4583	60.8333		36.6202	37.1217	37.225
1207	2017-10-06	03:00:00	59	36.99		67.8125	70.7917	60.75		36.6202	37.1404	37.1875
1208	2017-10-06	03:30:00	49	36.87		67.875	65.4167	59.75		36.6202	37.1496	37.14
1209	2017-10-06	04:00:00		36.87		68.2553	66.1304	60		36.6225	37.1542	37.0925
1210	2017-10-06	04:30:00	47	36.87		68.4468	63.5217	57.3636		36.6248	37.1588	37.0542
1211	2017-10-06	05:00:00	46	36.87		68.5106	62.3913	56.3636		36.6294	37.1679	37.0258
1212	2017-10-06	05:30:00	53	36.65		68.2766	61.4783	55.6364		36.6365	37.1492	36.9792
1213	2017-10-06	06:00:00	44	36.43		68.1064	60.1304	54.0909		36.6598	37.1117	36.9233
1214	2017-10-06	06:30:00	36	35.98		67.7447	58.7826	51.8182		36.6783	37.0604	36.83
1215	2017-10-06	07:00:00	46	35.09		67.2766	56.6087	49.9091		36.6783	36.9767	36.6625
1216	2017-10-06	07:30:00	57	34.85		66.8723	56.2609	49.9091		36.671	36.8733	36.47
1217	2017-10-06	08:00:00		34.98		65.913	55.9091	49.1		36.6665	36.7746	36.2933
1218	2017-10-06	08:30:00	66	35.01		66.8478	56.0455	50.3		36.6579	36.6733	36.1217
1219	2017-10-06	09:00:00	74	35.2		66.587	56.6818	51.8		36.6508	36.58	35.9725
1220	2017-10-06	09:30:00	60	35.76		66.3696	56.6364	52.9		36.6446	36.51	35.88
1221	2017-10-06	10:00:00	75	36.01		66.3261	57.4545	54.9091		36.6383	36.4504	35.8083
1222	2017-10-06	10:30:00		36.31		66.4667	56.5714	55.7		36.6358	36.4079	35.7617
1223	2017-10-06	11:00:00	136	36.54		67.7333	60.3333	64.7		36.6335	36.38	35.7342
1224	2017-10-06	11:30:00	66	36.43		67.5111	60.5714	66		36.6267	36.3475	35.7158
1225	2017-10-06	12:00:00	78	35.98		67.8	61.381	69.4		36.6475	36.3008	35.6783
1226	2017-10-06	12:30:00	66	36.09		67.8667	61.619	72.4		36.6335	36.2587	35.6875
1227	2017-10-06	13:00:00	45	36.2		66.8667	60.5714	72.3		36.6265	36.2213	35.78
1228	2017-10-06	13:30:00	53	36.54		67.0222	60.381	71.9		36.6313	36.1954	35.9208
1229	2017-10-06	14:00:00	43	36.65		67.1778	59.6667	69.2727		36.6358	36.1767	36.06
1230	2017-10-06	14:30:00	101	36.76		66.4667	61.9048	72.4545		36.6427	36.1638	36.2058
1231	2017-10-06	15:00:00	65	36.65		66.7778	62.1905	71.6364		36.645	36.1496	36.3267
1232	2017-10-06	15:30:00	47	36.54		63.8667	62.0952	70.4545		36.6427	36.1358	36.3917
1233	2017-10-06	16:00:00	97	36.65		64.9333	63.6818	72.4545		36.6404	36.1267	36.445
1234	2017-10-06	16:30:00	91	36.76		64.5778	65.6818	74		36.6404	36.1221	36.4825
1235	2017-10-06	17:00:00	104	37.02		65.2889	68.3182	71.3333		36.6481	36.1283	36.5225
1236	2017-10-06	17:30:00	81	36.76		65.4444	69.5909	72.5833		36.641	36.1329	36.55
1237	2017-10-06	18:00:00	61	37.02		65.1333	70.3636	71.1667		36.6346	36.1575	36.6367
1238	2017-10-06	18:30:00	62	37.1		65.0222	71.5455	70.8333		36.6323	36.2042	36.7208
1239	2017-10-06	19:00:00	67	37.1		64.3778	72.5	72.6667		36.6323	36.2879	36.7958
1240	2017-10-06	19:30:00	64	37.21		64.3556	72.8182	73.5833		36.6298	36.3862	36.8517
1241	2017-10-06	20:00:00	67	37.33		64.4222	72.5652	75.5833		36.6294	36.4842	36.9083
1242	2017-10-06	20:30:00	65	37.44		64.4667	72.5217	72.5833		36.6294	36.5854	36.965
1243	2017-10-06	21:00:00	63	37.55		64.5333	72.0435	72.4167		36.6317	36.6833	37.04
1244	2017-10-06	21:30:00	63	37.55		64.5778	72.1739	73.75		36.634	36.7579	37.1242
1245	2017-10-06	22:00:00	63	37.55		64.7111	71.6522	70.9167		36.6362	36.8221	37.1992
1246	2017-10-06	22:30:00	63	37.55		64.4222	71.2917	68.5833		36.6408	36.8737	37.265
1247	2017-10-06	23:00:00	77	37.55		64.8667	68.8333	66.3333		36.6479	36.9158	37.3092
1248	2017-10-06	23:30:00	81	37.55		65.3111	69.4583	66.3333		36.655	36.9625	37.375
1249	2017-10-07	00:00:00	58	37.44		65.2444	68.625	66.0833		36.6621	37.0233	37.41
1250	2017-10-07	00:30:00	59	37.33		65.2	68.3333	65.8333		36.6669	37.075	37.4292
1251	2017-10-07	01:00:00	120	37.21		66.3778	71.4583	70.25		36.6692	37.1171	37.4383
1252	2017-10-07	01:30:00	55	37.33		66.3333	71.5417	69.5		36.6727	37.15	37.4483
1253	2017-10-07	02:00:00	58	37.21		66.3333	72.1667	68.75		36.675	37.1733	37.4383
1254	2017-10-07	02:30:00	51	37.21		66.2667	70.0833	67.5833		36.6779	37.1921	37.4192
1255	2017-10-07	03:00:00	83	37.13		66.8	70.8333	69.25		36.6808	37.2121	37.3842
1256	2017-10-07	03:30:00	55	37.1		66.9333	71.1667	68.5833		36.6856	37.2354	37.3467
1257	2017-10-07	04:00:00	49	36.99		66.5435	69.1667	67.4167		36.6881	37.2496	37.3
1258	2017-10-07	04:30:00	48	36.87		66.5652	67.375	66.1667		36.6881	37.2542	37.2433
1259	2017-10-07	05:00:00	53	36.87		66.7174	65.25	64.1667		36.6881	37.2479	37.1867
1260	2017-10-07	05:30:00	39	36.76		66.413	63.5	60.6667		36.6904	37.2479	37.1208
1261	2017-10-07	06:00:00	65	36.54		66.8696	63.6667	61.25		36.6927	37.2279	37.0458
1262	2017-10-07	06:30:00	122	35.54		68.7391	66.1667	66.5		36.6835	37.1629	36.8967
1263	2017-10-07	07:00:00	50	35.2		68.8261	65.4583	60.6667		36.6858	37.0838	36.7292
1264	2017-10-07	07:30:00	70	35.2		69.1087	65.7083	61.9167		36.6931	37	36.5517
1265	2017-10-07	08:00:00		35.2		69.1087	65.6522	62.2727		36.6977	36.9113	36.3842
1266	2017-10-07	08:30:00	64	35.31		69.0652	65.6087	63.4545		36.704	36.8225	36.2258
1267	2017-10-07	09:00:00	59	35.76		68.7391	65.4348	61.2727		36.7156	36.7479	36.1117
1268	2017-10-07	09:30:00	75	36.4		69.0652	65.9565	63.0909		36.729	36.7	36.0533
1269	2017-10-07	10:00:00	70	36.76		68.9565	66.2609	65		36.7446	36.6671	36.0342
1270	2017-10-07	10:30:00	55	36.76		68.6596	65.913	65.6364		36.754	36.6342	36.025
1271	2017-10-07	11:00:00	97	36.65		67.8298	66.7826	69.6364		36.7562	36.5967	36.0067
1272	2017-10-07	11:30:00	136	36.54		69.3191	69.1739	78.4545		36.7585	36.5546	35.9883
1273	2017-10-07	12:00:00	70	36.54		69.1489	69.6957	78.9091		36.7702	36.5171	35.9883
1274	2017-10-07	12:30:00	32	36.2		68.4255	68.5217	70.7273		36.7725	36.47	36.0433
1275	2017-10-07	13:00:00	40	36.2		68.3191	65.0435	69.8182		36.7725	36.4279	36.1267
1276	2017-10-07	13:30:00	46	36.43		68.1702	64.6522	67.6364		36.7702	36.3904	36.2292
1277	2017-10-07	14:00:00	45	36.43		68.2128	64.087	65.75		36.7656	36.3579	36.3317
1278	2017-10-07	14:30:00	48	36.54		67.0851	63.9565	64.4167		36.761	36.33	36.4342
1279	2017-10-07	15:00:00	47	36.65		66.7021	62.3913	63.4167		36.761	36.31	36.5083
1280	2017-10-07	15:30:00	82	36.73		67.4468	63.5652	64		36.765	36.2946	36.5358
1281	2017-10-07	16:00:00	32	36.65		66.0638	62.8261	60.8333		36.765	36.2804	36.5267
1282	2017-10-07	16:30:00	90	36.54		66.0426	64.6522	63.75		36.7604	36.2667	36.5083
1283	2017-10-07	17:00:00	98	36.65		65.9149	66.6087	63.8333		36.7527	36.2575	36.5083
1284	2017-10-07	17:30:00		36.65		65.587	67.8636	57.2727		36.7504	36.2529	36.5175
1285	2017-10-07	18:00:00	63	36.76		65.6304	67.7727	56.6364		36.745	36.2621	36.5358
1286	2017-10-07	18:30:00	59	36.54		65.5652	64.9091	59.0909		36.7333	36.3037	36.5642
1287	2017-10-07	19:00:00	78	36.45		65.8043	66.1818	62.5455		36.7198	36.3558	36.585
1288	2017-10-07	19:30:00	63	37.02		65.7826	65.8636	64.0909		36.7158	36.4317	36.6342
1289	2017-10-07	20:00:00	58	37.21		65.587	65.5217	65.2727		36.7133	36.5154	36.6992
1290	2017-10-07	20:30:00	53	36.99		65.3261	65.0435	65.7273		36.704	36.5854	36.7367
1291	2017-10-07	21:00:00	56	36.87		65.1739	64.913	66.5455		36.6898	36.6317	36.755
1292	2017-10-07	21:30:00	60	36.65		65.1087	64.2609	64.5455		36.671	36.6421	36.7483
1293	2017-10-07	22:00:00	58	36.54		65	63.7391	66.9091		36.65	36.6329	36.7392
1294	2017-10-07	22:30:00	60	36.31		64.9348	63.9565	64.1818		36.6242	36.6142	36.72
1295	2017-10-07	23:00:00	60	36.43		64.5652	62.3478	60.7273		36.6008	36.605	36.7017
1296	2017-10-07	23:30:00	54	36.54		63.9783	58.7826	60.1667		36.5798	36.605	36.6925
1297	2017-10-08	00:00:00	102	36.87		64.9348	60.1739	63.4167		36.5679	36.6187	36.7017
1298	2017-10-08	00:30:00	64	36.99		65.0435	61.5652	63.8333		36.5608	36.6517	36.7392
1299	2017-10-08	01:00:00	57	37.1		63.6739	62.3043	62.0833		36.5585	36.6892	36.7933
1300	2017-10-08	01:30:00	58	37.1		63.7391	62.8261	61.6667		36.5537	36.7171	36.8
1301	2017-10-08	02:00:00	60	37.1		63.7826	63.4783	61.8333		36.5515	36.745	36.7908
1302	2017-10-08	02:30:00	60	36.99		63.9783	64	62.4167		36.5469	36.7638	36.7908
1303	2017-10-08	03:00:00	56	36.99		63.3913	64.3913	62.4167		36.544	36.7779	36.8008
1304	2017-10-08	03:30:00	48	36.87		63.2391	62.913	61.4167		36.5392	36.7837	36.8192
1305	2017-10-08	04:00:00	56	36.87		63.3913	63.9565	61.25		36.5367	36.7929	36.8467
1306	2017-10-08	04:30:00	63	36.87		63.7174	62.7826	61.5		36.5367	36.8067	36.8933
1307	2017-10-08	05:00:00	45	36.76		63.5435	60.4783	60.25		36.5344	36.8113	36.9208
1308	2017-10-08	05:30:00	49	36.65		63.7609	60	59.8333		36.5321	36.8113	36.93
1309	2017-10-08	06:00:00	46	36.65		63.3478	59.2917	55.1667		36.5344	36.8067	36.9117
1310	2017-10-08	06:30:00	39	35.76		61.5435	58.4583	53.0833		36.539	36.7742	36.8092
1311	2017-10-08	07:00:00	50	35.31		61.5435	57.2917	52.5		36.5412	36.7267	36.66
1312	2017-10-08	07:30:00		35.2		61.3556	57.0435	52		36.5412	36.6508	36.5017
1313	2017-10-08	08:00:00	80	35.42		61.7609	58	53.8182		36.5458	36.5763	36.3617
1314	2017-10-08	08:30:00	79	35.65		62.087	59.1304	55.5455		36.5529	36.5204	36.25
1315	2017-10-08	09:00:00	62	35.98		62.1522	59.3913	56.0909		36.5575	36.4833	36.1658
1316	2017-10-08	09:30:00	73	36.43		62.1087	59.9565	58.3636		36.5581	36.4742	36.1292
1317	2017-10-08	10:00:00	73	36.76		62.1739	60.6087	59.9091		36.5581	36.4833	36.12
1318	2017-10-08	10:30:00	65	36.76		62.3913	60.8261	60.0909		36.5581	36.5021	36.1108
1319	2017-10-08	11:00:00	66	36.2		61.7174	61.087	62		36.5487	36.4925	36.0642
1320	2017-10-08	11:30:00	56	36.31		59.9783	61.1739	62.6364		36.544	36.4829	36.0358
1321	2017-10-08	12:00:00	83	36.43		60.2609	60.3478	66		36.5417	36.4646	36.0175
1322	2017-10-08	12:30:00	60	36.65		60.8696	60.1739	67.9091		36.551	36.4504	36.0917
1323	2017-10-08	13:00:00	75	36.43		61.6304	60.9565	70.1818		36.5558	36.4225	36.185
1324	2017-10-08	13:30:00	84	36.09		62.4565	62.087	71.3333		36.5488	36.3804	36.2592
1325	2017-10-08	14:00:00		36.09		62.8444	62.1818	70.5455		36.5417	36.3383	36.315
1326	2017-10-08	14:30:00	52	36.2		62.9333	61.8182	68.0909		36.5346	36.3054	36.3608
1327	2017-10-08	15:00:00		36.54		63.2955	62.0952	68.7		36.5323	36.2867	36.4075
1328	2017-10-08	15:30:00		36.65		62.8605	62.8	68.2222		36.5306	36.2775	36.4258
1329	2017-10-08	16:00:00	27	36.76		62.7442	61.35	63.1111		36.5329	36.2729	36.4258
1330	2017-10-08	16:30:00	51	36.87		61.8372	60.75	61.5556		36.5398	36.2729	36.435
1331	2017-10-08	17:00:00	83	36.99		61.4884	62.65	63.4444		36.5469	36.2825	36.5008
1332	2017-10-08	17:30:00		36.87		61.4884	63.3684	64.375		36.5515	36.2917	36.5475
1333	2017-10-08	18:00:00		37.1		61.4524	64.3333	61.7143		36.5585	36.3104	36.6033
1334	2017-10-08	18:30:00	59	36.99		61.4524	65.4444	61.5714		36.5679	36.3617	36.6317
1335	2017-10-08	19:00:00	83	36.87		61.5714	67.2778	62.7143		36.5767	36.4267	36.6683
1336	2017-10-08	19:30:00	66	37.18		61.6429	67.2105	60.1429		36.58	36.5092	36.7592
1337	2017-10-08	20:00:00	60	37.21		61.6905	66.1579	60.125		36.58	36.5838	36.8525
1338	2017-10-08	20:30:00	58	37.1		61.8095	65.0526	60.875		36.5823	36.6442	36.9275
1339	2017-10-08	21:00:00	50	37.1		61.6667	64.4211	59.6667		36.5871	36.6908	36.9742
1340	2017-10-08	21:30:00	53	36.99		61.5	63.3684	59		36.5942	36.7142	37.0025
1341	2017-10-08	22:00:00	56	36.76		61.4524	62.4737	61.9		36.5987	36.7142	37.0025
1342	2017-10-08	22:30:00	79	36.76		61.9048	63.2105	64.7		36.6081	36.7142	36.9933
1343	2017-10-08	23:00:00	63	36.87		61.9762	63.0526	62.7		36.6173	36.7421	36.9833
1344	2017-10-08	23:30:00	58	36.87		62.0714	63.1579	62.2727		36.6242	36.7654	36.9833
1345	2017-10-09	00:00:00	57	36.87		61	61.7895	61.8333		36.6242	36.7838	36.9642
1346	2017-10-09	00:30:00	56	36.99		60.8095	61.5789	61.5833		36.6242	36.7979	36.9642
1347	2017-10-09	01:00:00	54	37.1		60.7381	60.4737	59.1667		36.6242	36.8258	36.9833
1348	2017-10-09	01:30:00	53	37.21		60.619	58.8421	58.0833		36.6265	36.8725	36.9858
1349	2017-10-09	02:00:00	51	37.21		60.4048	58.45	57.3333		36.6287	36.9192	36.9858
1350	2017-10-09	02:30:00	49	37.21		60.1429	58.3	56.5833		36.6333	36.9613	36.995
1351	2017-10-09	03:00:00	47	37.1		59.9286	57.7619	56.3333		36.6356	36.9846	36.995
1352	2017-10-09	03:30:00	47	37.1		59.9048	57.2727	55.8333		36.6404	37.0033	37.0042
1353	2017-10-09	04:00:00	58	36.99		59.9524	58.6818	56		36.6429	37.0129	37.0233
1354	2017-10-09	04:30:00	45	36.79		59.5238	58.4091	53.1667		36.6412	37.0096	37.0258
1355	2017-10-09	05:00:00	49	36.65		59.619	56.8636	52		36.639	36.9954	37.0075
1356	2017-10-09	05:30:00	41	36.54		59.4286	56.1739	50.5833		36.6367	36.9817	36.98
1357	2017-10-09	06:00:00	28	35.76		59	55	48.1667		36.6181	36.9258	36.8875
1358	2017-10-09	06:30:00	82	35.29		60.0238	55.9583	50.3333		36.6083	36.855	36.7458
1359	2017-10-09	07:00:00	44	35.31		59.881	54.3333	49.5		36.6083	36.79	36.5967
1360	2017-10-09	07:30:00	43	35.42		59.4884	53.375	48.6667		36.6129	36.7167	36.4475
1361	2017-10-09	08:00:00	70	35.87		59.2558	53.7917	50.25		36.6223	36.6608	36.3358
1362	2017-10-09	08:30:00	75	35.65		59.1628	54.5	52.4167		36.6223	36.6004	36.2058
1363	2017-10-09	09:00:00	63	35.87		59.186	55.0417	53.75		36.62	36.5492	36.1033
1364	2017-10-09	09:30:00	144	35.76		60.8372	58.8333	61.8333		36.606	36.4979	35.9917
1365	2017-10-09	10:00:00	60	35.84		60.5349	59	62		36.5869	36.4596	35.8958
1366	2017-10-09	10:30:00	50	35.76		60.186	57.7917	62.4167		36.566	36.4179	35.81
1367	2017-10-09	11:00:00	30	35.87		59.3488	56.4167	60.8333		36.5592	36.3762	35.745
1368	2017-10-09	11:30:00	81	36.31		59.9302	57.375	64.1667		36.5592	36.3529	35.7258
1369	2017-10-09	12:00:00	141	36.54		61.2791	60.875	73.5833		36.5615	36.3392	35.7908
1370	2017-10-09	12:30:00	79	36.76		61.7209	61.8333	73.3333		36.5637	36.3296	35.9133
1371	2017-10-09	13:00:00	62	37.1		61.4186	62.1667	74.8333		36.5777	36.3296	36.0625
1372	2017-10-09	13:30:00	61	37.33		60.8837	62.5	76.3333		36.6035	36.3346	36.2217
1373	2017-10-09	14:00:00	78	36.99		61.2727	63.625	77		36.6223	36.3254	36.315
1374	2017-10-09	14:30:00	91	36.87		62.1591	65.375	78.3333		36.6362	36.3113	36.4167
1375	2017-10-09	15:00:00	62	36.99		62.1556	66	78.25		36.6456	36.3067	36.51
1376	2017-10-09	15:30:00	117	36.87		63.3478	68.9167	76		36.6502	36.2971	36.6025
1377	2017-10-09	16:00:00	78	37.1		64.4565	69.75	77.5		36.6573	36.3017	36.7075
1378	2017-10-09	16:30:00	85	37.21		65.1957	71.4167	80.4167		36.6644	36.3192	36.8283
1379	2017-10-09	17:00:00	83	37.33		65.1957	72.8333	84.8333		36.6715	36.3475	36.95
1380	2017-10-09	17:30:00	77	37.33		65.4468	74.3333	84.5		36.681	36.3804	37.035
1381	2017-10-09	18:00:00	86	37.55		65.875	76.75	79.9167		36.6904	36.455	37.1192
1382	2017-10-09	18:30:00	87	37.44		66.4583	76.9583	80.5833		36.6998	36.5446	37.1758
1383	2017-10-09	19:00:00	87	37.33		66.5417	78.75	82.6667		36.7094	36.6288	37.195
1384	2017-10-09	19:30:00	76	37.33		66.75	80.125	83.9167		36.7125	36.7083	37.195
1385	2017-10-09	20:00:00	88	37.1		67.3333	80.875	84.75		36.7102	36.7596	37.2042
1386	2017-10-09	20:30:00	70	37.1		67.5833	80.6667	83		36.7102	36.82	37.2233
1387	2017-10-09	21:00:00	65	36.99		67.8958	80.75	83.25		36.7079	36.8667	37.2233
1388	2017-10-09	21:30:00	64	37.1		68.125	77.4167	78.8333		36.7102	36.9225	37.2425
1389	2017-10-09	22:00:00	72	36.99		68.4583	77.9167	78.3333		36.715	36.9704	37.2333
1390	2017-10-09	22:30:00	64	37.1		68.1458	78.5	76.5833		36.7221	37.0263	37.2242
1391	2017-10-09	23:00:00	63	37.02		68.1458	79.875	74.9167		36.7252	37.0742	37.1983
1392	2017-10-09	23:30:00	60	36.99		68.1875	79	73.5		36.7277	37.1025	37.17
1393	2017-10-10	00:00:00	60	36.96		68.25	75.625	71.3333		36.7296	37.12	37.1208
1394	2017-10-10	00:30:00	75	36.99		68.6458	75.4583	70.3333		36.7296	37.1296	37.0833
1395	2017-10-10	01:00:00	68	36.87		68.9375	75.7083	68.75		36.7248	37.12	37.045
1396	2017-10-10	01:30:00	57	36.76		69.0208	75.5417	67.1667		36.7154	37.0963	36.9975
1397	2017-10-10	02:00:00	59	36.76		69.1875	74.75	64.75		36.706	37.0867	36.9692
1398	2017-10-10	02:30:00	63	36.76		69.4792	73.5833	64.1667		36.6967	37.0821	36.9408
1399	2017-10-10	03:00:00	62	36.85		69.7917	73.5833	63.9167		36.6915	37.0763	36.9292
1400	2017-10-10	03:30:00	60	36.76		70.0625	71.2083	63.5833		36.6844	37.0717	36.9008
1401	2017-10-10	04:00:00	57	36.87		70.0417	70.3333	62.3333		36.6819	37.0621	36.8908
1402	2017-10-10	04:30:00	56	36.87		70.2708	69.125	61.6667		36.6835	37.0479	36.8717
1403	2017-10-10	05:00:00	88	36.87		71.0833	69.3333	63.75		36.6881	37.0288	36.8592
1404	2017-10-10	05:30:00	91	36.87		72.125	69.9167	66.3333		36.695	37.0096	36.8492
1405	2017-10-10	06:00:00		36.82		73.0638	69.2174	66.9091		36.7171	36.9792	36.8375
1406	2017-10-10	06:30:00	39	36.2		72.1489	67.1304	63.6364		36.736	36.9275	36.7717
1407	2017-10-10	07:00:00	78	35.9		72.8723	66.7391	64.5455		36.7483	36.8679	36.6908
1408	2017-10-10	07:30:00	39	35.87		72.7872	65.1304	62.9091		36.7577	36.8071	36.6167
1409	2017-10-10	08:00:00	49	35.95		72.3404	63.4348	62		36.7594	36.7592	36.5492
1410	2017-10-10	08:30:00		35.98		72.2826	63.1364	61.9		36.7662	36.7125	36.4842
1411	2017-10-10	09:00:00	58	36.2		72.1739	62.8182	61.5		36.7731	36.6796	36.43
1412	2017-10-10	09:30:00	94	35.98		71.087	64.1818	64.9		36.7777	36.6329	36.365
1413	2017-10-10	10:00:00	49	35.87		70.8478	63.1364	64.1		36.7783	36.5863	36.2817
1414	2017-10-10	10:30:00		35.87		71.3111	63.0952	65		36.7806	36.535	36.1983
1415	2017-10-10	11:00:00	85	35.76		72.5333	64.1429	64.6667		36.7783	36.4825	36.1058
1416	2017-10-10	11:30:00	63	36.09		72.1333	64.2857	61.5556		36.7737	36.445	36.0408
1417	2017-10-10	12:00:00	65	36.43		70.4444	64.5238	61.9		36.7715	36.4229	36.0083
1418	2017-10-10	12:30:00	174	36.31		72.5556	69.2381	75.4		36.7621	36.3946	36.0175
1419	2017-10-10	13:00:00	76	36.76		72.8667	69.619	75.2		36.755	36.39	36.0892
1420	2017-10-10	13:30:00	62	37.33		72.8889	69.8571	77.5		36.755	36.4138	36.2108
1421	2017-10-10	14:00:00	88	36.87		73.1111	71.2381	81.4		36.7525	36.4183	36.2875
1422	2017-10-10	14:30:00	68	37.1		72.6	71.4762	80.1818		36.7573	36.4325	36.3808
1423	2017-10-10	15:00:00	75	37.44		72.8889	72.0952	81.7273		36.7667	36.4571	36.4842
1424	2017-10-10	15:30:00	78	37.38		72.0222	72.9524	80.2727		36.7773	36.4829	36.6008
1425	2017-10-10	16:00:00	85	37.55		72.1778	74.2857	83.5455		36.7867	36.5112	36.7408
1426	2017-10-10	16:30:00	131	37.07		73.2	77.8571	87.5		36.7837	36.5196	36.8408
1427	2017-10-10	17:00:00	78	37.1		73.0889	77.381	86.9167		36.779	36.5292	36.9525
1428	2017-10-10	17:30:00	79	37.55		73.1333	76.8095	88.25		36.7835	36.5575	37.0742
1429	2017-10-10	18:00:00	73	37.44		72.8444	76.6364	88.9167		36.7812	36.5833	37.1583
1430	2017-10-10	18:30:00	66	37.44		72.3778	77.8636	79.9167		36.7812	36.635	37.2525
1431	2017-10-10	19:00:00	61	37.55		71.8	77.0909	78.6667		36.7858	36.7037	37.3183
1432	2017-10-10	19:30:00	82	37.44		71.9333	79.0455	80.3333		36.7881	36.7692	37.3275
1433	2017-10-10	20:00:00	84	37.55		71.8444	80.6364	80		36.7975	36.8358	37.3842
1434	2017-10-10	20:30:00	70	37.55		71.8444	80.1739	80.1667		36.8069	36.9012	37.4217
1435	2017-10-10	21:00:00		37.44		72	81.1818	80.6364		36.8162	36.9529	37.4217
1436	2017-10-10	21:30:00		37.55		72.186	80.5714	80.9		36.8256	37.0183	37.4358
1437	2017-10-10	22:00:00		37.55		72.1905	82.15	80.4444		36.8373	37.0883	37.4358
1438	2017-10-10	22:30:00	60	37.55		72.0952	81.0952	72.5556		36.8467	37.1583	37.4758
1439	2017-10-10	23:00:00	94	37.41		72.8333	81.5238	74.3333		36.8548	37.2271	37.5017
1440	2017-10-10	23:30:00	60	37.44		72.8333	81.381	72.2222		36.8642	37.2833	37.4925
1441	2017-10-11	00:00:00	70	37.21		73.0714	81.619	71.8889		36.8694	37.3158	37.4733
1442	2017-10-11	00:30:00	63	37.55		72.7857	76.3333	71.5556		36.881	37.3675	37.4825
1443	2017-10-11	01:00:00	61	37.67		72.619	75.619	71.5556		36.8977	37.4054	37.4925
1444	2017-10-11	01:30:00		37.55		73	76.3	70.25		36.9142	37.4146	37.5017
1445	2017-10-11	02:00:00	56	37.33		72.9268	74.7	66.75		36.926	37.4337	37.4833
1446	2017-10-11	02:30:00	56	37.21		72.7561	74.1	65		36.9354	37.4383	37.455
1447	2017-10-11	03:00:00	75	36.87		73.0732	74.1	66.1111		36.9358	37.4146	37.4075
1448	2017-10-11	03:30:00	72	36.76		73.3659	73.8	66.7		36.9358	37.3888	37.3417
1449	2017-10-11	04:00:00	56	36.99		73.3415	72.35	65.7273		36.9383	37.3654	37.295
1450	2017-10-11	04:30:00	50	37.21		73.1951	68.3	64.8182		36.9454	37.3712	37.2667
1451	2017-10-11	05:00:00	59	37.3		72.4878	67.35	61.6364		36.9544	37.3796	37.2575
1452	2017-10-11	05:30:00	52	37.21		71.5366	66	60.9091		36.9615	37.3654	37.2383
1453	2017-10-11	06:00:00	81	36.43		71.7619	66.4	61.9091		36.9533	37.3233	37.1733
1454	2017-10-11	06:30:00	42	35.98		71.8333	65.2	60		36.9487	37.2625	37.0425
1455	2017-10-11	07:00:00	41	35.87		70.9524	64.2	58.1818		36.9481	37.1925	36.8925
1456	2017-10-11	07:30:00		35.87		71.7317	63.2632	58.1818		36.9481	37.1271	36.7525
1457	2017-10-11	08:00:00	21	35.87		71.0488	59.9474	55		36.9465	37.0571	36.6308
1458	2017-10-11	08:30:00	65	35.87		70.9048	59.6842	55.8182		36.9442	36.9871	36.5192
1459	2017-10-11	09:00:00	73	36.31		71.2619	60.35	55.6364		36.9465	36.94	36.4725
1460	2017-10-11	09:30:00	78	36.76		70.881	61.1905	56.1818		36.9627	36.9071	36.4725
1461	2017-10-11	10:00:00	63	37.1		71.2143	61.2727	56.8182		36.9883	36.8883	36.4817
1462	2017-10-11	10:30:00	68	36.87		71.1395	61.6364	58.4545		37.0092	36.86	36.4533
1463	2017-10-11	11:00:00	60	37.21		70.5581	60.0909	58.5455		37.0394	36.8517	36.4458
1464	2017-10-11	11:30:00	73	36.87		70.7907	60.6818	60.4545		37.0556	36.8279	36.4175
1465	2017-10-11	12:00:00	72	36.87		70.9535	60.7727	59.6364		37.0648	36.8137	36.4542
1466	2017-10-11	12:30:00	71	36.87		68.5581	61.1364	62.2727		37.0765	36.7854	36.5283
1467	2017-10-11	13:00:00	90	36.99		68.8837	62.4545	66.7273		37.0812	36.7571	36.6217
1468	2017-10-11	13:30:00	79	36.54		69.2791	63.1739	67.75		37.0648	36.715	36.6775
1469	2017-10-11	14:00:00	84	36.87		69.186	64.3913	73		37.0648	36.6958	36.7608
1470	2017-10-11	14:30:00	156	36.76		71.2326	68.7391	80.5833		37.0577	36.6771	36.835
1471	2017-10-11	15:00:00	89	36.76		71.5581	69.3478	81.9167		37.0435	36.6725	36.8725
1472	2017-10-11	15:30:00		36.76		71.4048	69.2273	82.2727		37.0306	36.6725	36.8725
1473	2017-10-11	16:00:00	87	36.87		71.4524	70.6364	84.4545		37.0165	36.6675	36.8533
1474	2017-10-11	16:30:00	38	36.87		69.2381	70.0909	81.7273		37.0123	36.6533	36.8533
1475	2017-10-11	17:00:00	69	36.87		69.0238	70.5455	82.5455		37.0075	36.6354	36.825
1476	2017-10-11	17:30:00	66	36.99		68.7143	71.1818	81.9091		36.9958	36.6262	36.835
1477	2017-10-11	18:00:00	58	36.99		68.3571	70.1364	80.6364		36.9865	36.6496	36.845
1478	2017-10-11	18:30:00	60	36.87		68.2143	70.9545	79.6364		36.9746	36.6867	36.845
1479	2017-10-11	19:00:00	61	37.21		68.2143	71.8636	77		36.9675	36.7425	36.8633
1480	2017-10-11	19:30:00	65	37.1		67.8095	71.5652	75.7273		36.9604	36.7938	36.91
1481	2017-10-11	20:00:00	67	37.1		67.4048	73.5652	74.1818		36.951	36.845	36.9292
1482	2017-10-11	20:30:00	59	37.13		67.1429	73.3043	65.3636		36.9423	36.8975	36.96
1483	2017-10-11	21:00:00	61	37.33		67	72.7826	62.8182		36.94	36.94	37.0075
1484	2017-10-11	21:30:00	54	37.33		66.7045	71.7391	62.0833		36.9354	36.9638	37.055
1485	2017-10-11	22:00:00	57	37.33		66.4889	71.4783	59.5833		36.9308	36.9733	37.0933
1486	2017-10-11	22:30:00	69	37.33		66.6889	71.5217	62.1667		36.9262	36.9925	37.1317
1487	2017-10-11	23:00:00	56	37.33		65.8444	71.3478	61.0833		36.9246	36.9975	37.17
1488	2017-10-11	23:30:00	55	37.44		65.7333	70.5652	60.1667		36.9246	37.0213	37.2075
1489	2017-10-12	00:00:00	53	37.44		65.3556	69.7391	59.75		36.9294	37.045	37.245
1490	2017-10-12	00:30:00	52	37.44		65.1111	68.913	59.0833		36.9271	37.0688	37.2925
1491	2017-10-12	01:00:00	55	37.33		64.9778	67.3913	58.5833		36.92	37.0829	37.3025
1492	2017-10-12	01:30:00	54	37.21		64.7391	66.3043	57.6667		36.9129	37.1108	37.3117
1493	2017-10-12	02:00:00	39	37.1		64.3696	64.3478	55.3333		36.9081	37.1204	37.3117
1494	2017-10-12	02:30:00	46	36.87		64.1522	59.5652	54.25		36.901	37.125	37.29
1495	2017-10-12	03:00:00	52	36.87		63.6522	57.9565	53.5		36.901	37.1296	37.2517
1496	2017-10-12	03:30:00	40	36.76		62.9565	57.2083	52.3333		36.901	37.1296	37.2042
1497	2017-10-12	04:00:00	45	36.76		62.7174	55.4583	51.3333		36.8962	37.125	37.1567
1498	2017-10-12	04:30:00		36.76		63	56.2174	49.7273		36.8869	37.1204	37.1092
1499	2017-10-12	05:00:00	41	36.65		62.6	55	48.3636		36.8733	37.1112	37.0525
1500	2017-10-12	05:30:00	51	36.65		62.5778	54.3478	48		36.8617	37.0971	36.9867
1501	2017-10-12	06:00:00	153	35.87		64.1778	58.4783	57.0909		36.85	37.0504	36.8558
1502	2017-10-12	06:30:00	63	35.48		64.6444	58.6087	58.0909		36.8396	36.9925	36.6925
1503	2017-10-12	07:00:00	87	35.54		65.6667	59.7391	61		36.8327	36.9229	36.5433
1504	2017-10-12	07:30:00	52	35.54		65.3696	59.1739	60.8182		36.8258	36.8579	36.4042
1505	2017-10-12	08:00:00		35.65		66.3556	58.8182	63		36.8212	36.7975	36.2833
1506	2017-10-12	08:30:00	125	35.62		67.6889	61.8182	70.9		36.816	36.7346	36.1792
1507	2017-10-12	09:00:00	73	35.76		67.6889	62.3636	73		36.8046	36.6692	36.0867
1508	2017-10-12	09:30:00	60	36.09		67.2889	62.6364	75		36.7906	36.6175	36.0308
1509	2017-10-12	10:00:00	60	36.2		67.2222	62.7727	76.5		36.7719	36.5704	35.9842
1510	2017-10-12	10:30:00	80	36.48		67.4889	63.2727	76.8182		36.7637	36.535	35.9608
1511	2017-10-12	11:00:00	73	36.76		67.7778	64.0455	79.7273		36.7544	36.5112	35.97
1512	2017-10-12	11:30:00	76	35.87		67.8444	65	82		36.7335	36.4458	35.905
1513	2017-10-12	12:00:00	79	36.65		68	66.1818	75.2727		36.729	36.4129	35.97
1514	2017-10-12	12:30:00	27	36.54		67.0222	65.0455	72		36.7221	36.3754	36.0583
1515	2017-10-12	13:00:00	70	36.54		66.5778	65.7273	70.4545		36.7127	36.3425	36.1417
1516	2017-10-12	13:30:00	49	36.76		65.9111	65.5	70.1818		36.7173	36.3237	36.2433
1517	2017-10-12	14:00:00	42	36.76		64.9778	65.6364	67.8333		36.715	36.3096	36.3358
1518	2017-10-12	14:30:00	170	36.76		65.2889	71.2727	71.5833		36.715	36.305	36.4308
1519	2017-10-12	15:00:00	83	36.76		65.1556	72.6818	72.4167		36.715	36.3004	36.5142
1520	2017-10-12	15:30:00	45	36.54		64.7174	72.9091	71.1667		36.7104	36.2912	36.5517
1521	2017-10-12	16:00:00	75	36.43		64.4565	74.2727	72.4167		36.7012	36.2775	36.5708
1522	2017-10-12	16:30:00	80	36.43		65.3696	74.5217	72.4167		36.6921	36.2637	36.5667
1523	2017-10-12	17:00:00	48	36.31		64.913	74.8261	70.3333		36.6804	36.2496	36.5292
1524	2017-10-12	17:30:00	41	36.37		64.3696	74.3913	67.4167		36.6675	36.2379	36.5708
1525	2017-10-12	18:00:00	69	36.76		64.6087	70.7391	66.5833		36.6627	36.275	36.58
1526	2017-10-12	18:30:00	58	36.65		64.5652	70.5217	69.1667		36.6581	36.3237	36.5892
1527	2017-10-12	19:00:00	61	36.87		64.5652	69.3913	68.4167		36.651	36.3792	36.6167
1528	2017-10-12	19:30:00	59	37.1		64.4348	69.6957	69.25		36.651	36.4442	36.645
1529	2017-10-12	20:00:00	133	36.99		65.8696	72.3333	76.8333		36.6487	36.5	36.6642
1530	2017-10-12	20:30:00	50	36.76		65.6739	69.2083	66.8333		36.641	36.5475	36.6642
1531	2017-10-12	21:00:00	49	36.65		65.413	68.2083	64		36.6269	36.5846	36.655
1532	2017-10-12	21:30:00	59	36.43		65.5217	68.1667	65.1667		36.6081	36.5987	36.6458
1533	2017-10-12	22:00:00	50	36.54		65.3696	67.75	63.0833		36.5917	36.6129	36.655
1534	2017-10-12	22:30:00	41	36.54		64.7609	66.125	59.8333		36.5752	36.6154	36.6642
1535	2017-10-12	23:00:00	144	36.54		66.6739	69.0833	67.8333		36.5587	36.6062	36.6833
1536	2017-10-12	23:30:00	55	36.65		66.6739	68.2083	69		36.5423	36.6387	36.7067
1537	2017-10-13	00:00:00	53	36.76		66.6739	67.125	67.6667		36.5281	36.6433	36.7067
1538	2017-10-13	00:30:00	54	36.76		66.7174	68.25	67.3333		36.514	36.6525	36.7158
1539	2017-10-13	01:00:00	71	36.87		67.0652	68.2917	68.1667		36.5044	36.6662	36.7158
1540	2017-10-13	01:30:00	55	36.99		67.087	68.5417	67.8333		36.4998	36.6758	36.7067
1541	2017-10-13	02:00:00	57	36.99		67.4783	69.1667	61.5		36.4975	36.6854	36.7067
1542	2017-10-13	02:30:00	47	37.1		67.5	64.0417	61.25		36.5023	36.6996	36.735
1543	2017-10-13	03:00:00	50	37.07		67.4565	62.6667	61.3333		36.5065	36.7125	36.77
1544	2017-10-13	03:30:00	42	36.99		67.5	62.5417	59.9167		36.5112	36.7313	36.8167
1545	2017-10-13	04:00:00	43	36.99		67.4565	61.2083	59.3333		36.516	36.7546	36.8542
1546	2017-10-13	04:30:00	71	36.87		67.5319	60.8333	61.8333		36.5183	36.7729	36.8817
1547	2017-10-13	05:00:00	38	36.87		67.4681	60.4167	53		36.5229	36.7963	36.9092
1548	2017-10-13	05:30:00	34	36.87		67.1064	60.125	51.25		36.5275	36.8171	36.9275
1549	2017-10-13	06:00:00	40	36.76		64.7021	58.9167	50.1667		36.546	36.8171	36.9275
1550	2017-10-13	06:30:00	48	36.54		64.383	58.5	49.6667		36.5681	36.8125	36.9092
1551	2017-10-13	07:00:00		35.65		63.8913	58.3913	47.7273		36.5704	36.7617	36.8075
1552	2017-10-13	07:30:00	64	35.31		64.1522	58.6087	48.5455		36.5656	36.6871	36.6675
1553	2017-10-13	08:00:00	120	35.42		65.3404	58.0435	54.2727		36.5608	36.6217	36.5367
1554	2017-10-13	08:30:00	47	35.42		63.6809	57.913	54.2727		36.5567	36.5658	36.3967
1555	2017-10-13	09:00:00	58	35.76		63.3617	58.3043	55		36.5567	36.5287	36.2875
1556	2017-10-13	09:30:00	69	35.98		63.5532	58.7391	57.4545		36.5544	36.51	36.2033
1557	2017-10-13	10:00:00	70	36.43		63.766	59.6087	59.9091		36.5592	36.5054	36.1567
1558	2017-10-13	10:30:00	76	36.43		63.6809	61.1304	60.3636		36.5581	36.5008	36.12
1559	2017-10-13	11:00:00		36.54		63.4783	57.3636	62.6		36.5535	36.5008	36.0925
1560	2017-10-13	11:30:00	59	36.76		63.1087	57.5455	65.1		36.5721	36.5054	36.0833
1561	2017-10-13	12:00:00	91	36.65		63.3696	59.2727	70.2		36.5721	36.5008	36.0742
1562	2017-10-13	12:30:00	83	36.31		64.587	60.5909	73.7		36.5673	36.4821	36.055
1563	2017-10-13	13:00:00		36.43		64.4667	60.0952	73.7		36.565	36.4637	36.12
1564	2017-10-13	13:30:00	52	36.54		64.5333	59.9524	72.5		36.5604	36.445	36.2225
1565	2017-10-13	14:00:00	44	36.59		64.5778	59.3333	64.9		36.5569	36.4283	36.32
1566	2017-10-13	14:30:00	47	36.54		61.8444	59.3333	64.9		36.5523	36.405	36.4133
1567	2017-10-13	15:00:00	80	36.57		61.7778	60.7619	67.1		36.5483	36.3842	36.4808
1568	2017-10-13	15:30:00		36.54		62.1591	61.7	66.8889		36.5483	36.3654	36.5275
1569	2017-10-13	16:00:00	49	36.54		61.5682	62	64.5556		36.5506	36.3467	36.5367
1570	2017-10-13	16:30:00	89	36.54		61.7727	62.9	66		36.5529	36.3329	36.5458
1571	2017-10-13	17:00:00	81	36.54		62.5227	65.05	67.5		36.5577	36.3192	36.5458
1572	2017-10-13	17:30:00	63	36.43		63.0227	66.5	67.9		36.559	36.3008	36.5183
1573	2017-10-13	18:00:00	59	36.87		62.7955	67.45	64.7		36.5613	36.3054	36.5367
1574	2017-10-13	18:30:00	64	36.99		62.9318	68.25	62.8		36.5683	36.3242	36.5933
1575	2017-10-13	19:00:00	53	36.87		62.75	67.5238	61.9091		36.5683	36.375	36.63
1576	2017-10-13	19:30:00	62	37.21		62.8182	67.4286	62.8182		36.5706	36.4542	36.6858
1577	2017-10-13	20:00:00	60	37.3		61.1591	64.5714	64.2727		36.5771	36.5325	36.745
1578	2017-10-13	20:30:00	61	37.44		61.4091	65.2381	65.5455		36.5912	36.6167	36.82
1579	2017-10-13	21:00:00	60	37.44		61.6591	65.3333	63.7273		36.6077	36.6867	36.8925
1580	2017-10-13	21:30:00	63	37.55		61.75	65.0476	63.6667		36.631	36.7521	36.9767
1581	2017-10-13	22:00:00	54	37.44		61.8409	64.2857	64.0833		36.6498	36.7942	37.0517
1582	2017-10-13	22:30:00	55	37.21		62.1591	63.2857	61.25		36.6637	36.8267	37.1075
1583	2017-10-13	23:00:00	57	37.21		60.1818	63	59.25		36.6777	36.8546	37.1633
1584	2017-10-13	23:30:00	61	37.1		60.3182	63.0909	59.0833		36.6871	36.8688	37.2192
1585	2017-10-14	00:00:00	49	37.1		60.2273	61.1818	58.25		36.6942	36.8875	37.2383
1586	2017-10-14	00:30:00	49	37.21		60.1136	59.6364	57		36.7035	36.925	37.2567
1587	2017-10-14	01:00:00	53	37.21		59.7045	59.3478	57		36.7106	36.9575	37.285
1588	2017-10-14	01:30:00	65	37.21		59.9318	59.913	57.25		36.7152	36.9854	37.285
1589	2017-10-14	02:00:00	67	37.21		60.1591	60.913	57.8333		36.7198	37.0113	37.2775
1590	2017-10-14	02:30:00	45	37.13		60.1136	60.8261	56.5		36.7204	37.0358	37.2517
1591	2017-10-14	03:00:00	35	37.1		59.7727	58.8696	54.4167		36.721	37.0579	37.2233
1592	2017-10-14	03:30:00	34	36.99		59.5909	57.8333	52		36.721	37.0767	37.1767
1593	2017-10-14	04:00:00	47	36.87		59.6818	57.75	51.4167		36.7185	37.0904	37.1292
1594	2017-10-14	04:30:00	46	36.76		59.1136	55.9583	50.6667		36.7162	37.0996	37.0917
1595	2017-10-14	05:00:00	46	36.65		59.2955	54.5	49.75		36.7117	37.1042	37.045
1596	2017-10-14	05:30:00	66	36.31		60.0227	54.625	50.1667		36.7	37.0992	36.9792
1597	2017-10-14	06:00:00	43	35.42		60.0909	53.9583	49.6667		36.6721	37.0388	36.8392
1598	2017-10-14	06:30:00	56	35.09		60.2727	53.625	50.25		36.6419	36.9596	36.6625
1599	2017-10-14	07:00:00	48	35.09		60	53.4167	49.8333		36.6302	36.8854	36.4858
1600	2017-10-14	07:30:00	73	35.09		60.2	53.875	50.5		36.6256	36.7971	36.3092
1601	2017-10-14	08:00:00	60	35.2		58.8667	53.875	49.9167		36.621	36.7096	36.1417
1602	2017-10-14	08:30:00	58	35.42		59.1111	53.75	51		36.621	36.6254	35.9992
1603	2017-10-14	09:00:00	60	35.76		59.1556	53.75	53.0833		36.621	36.5554	35.8875
1604	2017-10-14	09:30:00	75	36.09		59.2889	54.25	56.5		36.6233	36.4946	35.8125
1605	2017-10-14	10:00:00	98	36.31		59.9111	56.0833	60.75		36.6208	36.4475	35.7658
1606	2017-10-14	10:30:00	35	36.65		59	55.25	59.8333		36.6254	36.4242	35.7567
1607	2017-10-14	11:00:00	61	36.76		59.0435	55.4167	61.0833		36.63	36.4054	35.7658
1608	2017-10-14	11:30:00	65	36.87		59.1739	55.5833	61		36.6323	36.3958	35.8125
1609	2017-10-14	12:00:00	79	37.44		58.913	56.8333	64		36.6487	36.41	35.9808
1610	2017-10-14	12:30:00	72	37.55		58.6739	57.7917	65.3333		36.6746	36.4242	36.1858
1611	2017-10-14	13:00:00	136	36.99		60.3191	61.25	72.6667		36.6863	36.415	36.3442
1612	2017-10-14	13:30:00	44	36.43		60.1489	60.375	70.25		36.684	36.3825	36.4558
1613	2017-10-14	14:00:00	55	36.31		60.383	59.875	69.8333		36.6781	36.345	36.5483
1614	2017-10-14	14:30:00	46	36.31		60.3617	59.9167	68.8333		36.6733	36.3108	36.6225
1615	2017-10-14	15:00:00	75	36.31		60.2553	61.5833	70.0833		36.6679	36.2779	36.6683
1616	2017-10-14	15:30:00	44	36.43		59.9167	62	67.5		36.6656	36.2546	36.6967
1617	2017-10-14	16:00:00	48	36.43		59.8958	62.0417	63.3333		36.6633	36.2362	36.7067
1618	2017-10-14	16:30:00		36.54		59.2766	62.7391	65.9091		36.6633	36.2271	36.6975
1619	2017-10-14	17:00:00		36.59		58.8043	63.5	66.4		36.6644	36.2246	36.6833
1620	2017-10-14	17:30:00	65	36.76		58.8478	63.4545	66.4		36.6713	36.2433	36.6742
1621	2017-10-14	18:00:00		37.1		58.8444	64.4286	65		36.676	36.3133	36.6458
1622	2017-10-14	18:30:00	64	37.1		58.8444	64.8095	64.1111		36.6783	36.3971	36.6083
1623	2017-10-14	19:00:00	66	37.1		59.1333	65.6667	56.3333		36.6831	36.4808	36.6175
1624	2017-10-14	19:30:00	53	37.21		58.9333	64.7143	57.3333		36.6831	36.5692	36.6825
1625	2017-10-14	20:00:00	51	37.41		58.7333	64.2857	56.8889		36.6854	36.6613	36.7742
1626	2017-10-14	20:30:00	52	37.33		58.5333	64	57.5556		36.6831	36.7408	36.8592
1627	2017-10-14	21:00:00	57	37.44		58.4667	63.8571	55.5556		36.6831	36.8108	36.9533
1628	2017-10-14	21:30:00	52	37.52		58.2222	62.7619	56.4444		36.6825	36.8704	37.0442
1629	2017-10-14	22:00:00	52	37.55		58.1778	60.5714	56.8889		36.6848	36.9221	37.1375
1630	2017-10-14	22:30:00	17	37.55		57.3333	59.7143	52.9		36.6919	36.9596	37.2217
1631	2017-10-14	23:00:00	66	37.55		57.5333	59.9524	54.0909		36.699	36.9925	37.3017
1632	2017-10-14	23:30:00	72	37.55		57.7778	60.2857	54.7273		36.7083	37.0208	37.3675
1633	2017-10-15	00:00:00	98	37.44		58.8667	61.1905	58.3333		36.7154	37.0208	37.3958
1634	2017-10-15	00:30:00	48	37.33		58.8444	60.0476	57		36.7179	37.0117	37.415
1635	2017-10-15	01:00:00		37.33		58.9773	56.25	56.1818		36.7204	37.0258	37.4342
1636	2017-10-15	01:30:00	187	37.33		61.75	63.4	68.3636		36.7229	37.0633	37.4442
1637	2017-10-15	02:00:00	170	37.21		64.0909	69.15	79.1818		36.7229	37.1008	37.4275
1638	2017-10-15	02:30:00	48	37.13		64.1591	69.25	78.8182		36.7229	37.135	37.4108
1639	2017-10-15	03:00:00	133	37.1		66.3864	72.15	85.7273		36.7229	37.1679	37.3825
1640	2017-10-15	03:30:00	46	37.1		66.6591	72.25	85.1818		36.7252	37.1958	37.3475
1641	2017-10-15	04:00:00	52	36.99		66.7727	72.45	85.1818		36.7277	37.2192	37.3008
1642	2017-10-15	04:30:00	54	36.93		66.9545	71.5714	88.5455		36.7312	37.2354	37.2492
1643	2017-10-15	05:00:00	45	36.87		66.9318	70.3636	86.6364		36.7358	37.2471	37.1925
1644	2017-10-15	05:30:00	45	36.87		66.4545	69.4545	84.1818		36.7475	37.2517	37.1358
1645	2017-10-15	06:00:00	138	36.54		68.6136	72.4348	87.8182		36.7708	37.2283	37.0608
1646	2017-10-15	06:30:00	66	35.54		68.8409	72.5217	89.4545		36.7802	37.1633	36.9117
1647	2017-10-15	07:00:00	46	35.31		68.7955	71.6522	85.8333		36.7848	37.0887	36.7433
1648	2017-10-15	07:30:00	125	35.42		69.9773	74.7826	80.6667		36.7917	37.0142	36.5842
1649	2017-10-15	08:00:00	66	35.54		70.1136	75.4348	72		36.7987	36.9362	36.445
1650	2017-10-15	08:30:00	28	35.54		69.4318	74.3913	70.3333		36.8012	36.8617	36.3125
1651	2017-10-15	09:00:00	70	35.87		69.6591	74.9565	65.0833		36.8035	36.7962	36.21
1652	2017-10-15	09:30:00	74	36.09		69.6364	75.913	67.4167		36.8035	36.7367	36.1258
1653	2017-10-15	10:00:00	75	36.54		69.1136	76.913	69.3333		36.8083	36.6946	36.0883
1654	2017-10-15	10:30:00	59	36.43		69.6591	78.7391	69.75		36.8037	36.6479	36.0467
1655	2017-10-15	11:00:00	60	35.09		69.6364	78.4783	71		36.769	36.5454	35.8983
1656	2017-10-15	11:30:00	64	36.87		69.6136	78.1304	72.5833		36.769	36.5171	35.8983
1657	2017-10-15	12:00:00	44	36.54		68.8182	75.7826	64.75		36.7502	36.4796	35.8983
1658	2017-10-15	12:30:00	69	36.31		68.75	76.6957	65		36.7244	36.4371	35.9625
1659	2017-10-15	13:00:00	22	36.54		66.1591	74.4167	63		36.715	36.4042	36.065
1660	2017-10-15	13:30:00	73	36.54		66.8182	69.6667	58.6667		36.7173	36.3712	36.1583
1661	2017-10-15	14:00:00	156	36.48		69.1136	69.0833	66.1667		36.7208	36.3408	36.2367
1662	2017-10-15	14:30:00	87	36.54		70.0455	70.7083	71.0833		36.7256	36.3162	36.32
1663	2017-10-15	15:00:00	70	36.54		69.9318	68.0833	71.0833		36.7304	36.2929	36.3758
1664	2017-10-15	15:30:00		37.21		70.5349	69.0435	70.8182		36.7467	36.2975	36.4692
1665	2017-10-15	16:00:00	44	37.1		70.4419	68.6957	68		36.7606	36.3021	36.5158
1666	2017-10-15	16:30:00	80	36.87		70.6591	69.8261	69.9091		36.7675	36.2996	36.5525
1667	2017-10-15	17:00:00	49	36.76		70.1778	70	68.9091		36.771	36.295	36.6917
1668	2017-10-15	17:30:00		37.3		70.2955	71.1364	69.4		36.7823	36.3129	36.7275
1669	2017-10-15	18:00:00		37.33		70.2955	67.9524	72.2222		36.7871	36.3458	36.7933
1670	2017-10-15	18:30:00	75	37.21		70.5455	68.381	72.8889		36.7894	36.4154	36.8683
1671	2017-10-15	19:00:00	40	36.87		69.9545	68.0952	74.8889		36.7846	36.4804	36.8958
1672	2017-10-15	19:30:00	58	37.3		70.0682	64.9048	73.2222		36.7865	36.5588	36.9592
1673	2017-10-15	20:00:00	64	37.44		70.3636	64.8095	63		36.7871	36.6379	37.0392
1674	2017-10-15	20:30:00	56	37.44		70.4545	66.1429	59.5556		36.7894	36.7171	37.1142
1675	2017-10-15	21:00:00	32	37.67		69.8864	64.3333	55.3333		36.7942	36.7921	37.2083
1676	2017-10-15	21:30:00	79	37.67		70.5	64.5714	57.7		36.7973	36.8579	37.2467
1677	2017-10-15	22:00:00	58	37.69		70.6364	63.7619	59.1		36.8002	36.9058	37.2958
1678	2017-10-15	22:30:00	60	37.78		71.6136	63.8095	57.1		36.805	36.9621	37.3717
1679	2017-10-15	23:00:00	96	37.78		72.2955	65.5238	61.8		36.8098	37.0742	37.4567
1680	2017-10-15	23:30:00	100	37.78		72.9318	67.2381	65.2727		36.8146	37.1121	37.4967
1681	2017-10-16	00:00:00	57	37.67		72	67.8571	64.5833		36.8194	37.1592	37.525
1682	2017-10-16	00:30:00	63	37.55		72.3409	67.5714	63.5833		36.824	37.2108	37.5533
1683	2017-10-16	01:00:00		37.55		72.3409	69.85	65.7273		36.8285	37.2529	37.61
1684	2017-10-16	01:30:00	187	37.52		72.3409	75.55	77.4545		36.8325	37.2937	37.6283
1685	2017-10-16	02:00:00	62	37.44		69.8864	70.85	77.2727		36.8373	37.3337	37.6283
1686	2017-10-16	02:30:00	50	37.44		69.9318	69	76.7273		36.8438	37.3712	37.6283
1687	2017-10-16	03:00:00	55	37.3		68.1591	68.25	78.8182		36.8479	37.4029	37.5975
1688	2017-10-16	03:30:00	76	37.16		68.8409	68.619	78.5455		36.8492	37.4008	37.555
1689	2017-10-16	04:00:00	55	36.99		68.9091	69.1429	78.2727		36.8492	37.3962	37.4967
1690	2017-10-16	04:30:00	54	36.87		68.9091	67.9048	77.7273		36.8479	37.3962	37.4208
1691	2017-10-16	05:00:00	39	36.87		68.7727	67.4286	72.5455		36.8479	37.4008	37.345
1692	2017-10-16	05:30:00	56	36.76		69.0227	66.9091	68.5455		36.8456	37.3783	37.26
1693	2017-10-16	06:00:00	46	36.09		66.9318	66	67.5455		36.8362	37.3267	37.1283
1694	2017-10-16	06:30:00	41	35.31		66.3636	64.5217	65.5455		36.8315	37.2475	36.9417
1695	2017-10-16	07:00:00	50	35.09		66.4545	64.9565	64.25		36.8269	37.1733	36.7367
1696	2017-10-16	07:30:00	53	35.09		64.8182	64.7391	53.0833		36.82	37.0813	36.5342
1697	2017-10-16	08:00:00	50	35.29		64.4545	64.1304	52.0833		36.8148	36.9917	36.355
1698	2017-10-16	08:30:00	79	35.4		65.6136	65.1304	54.5		36.8119	36.9067	36.185
1699	2017-10-16	09:00:00	87	35.54		66	67.5217	57.1667		36.805	36.8179	36.0383
1700	2017-10-16	09:30:00		35.65		65.814	67	55.4545		36.7958	36.7337	35.9125
1701	2017-10-16	10:00:00	94	35.54		66.2558	68.6364	59		36.775	36.6442	35.7917
1702	2017-10-16	10:30:00	87	35.65		66.907	69.8636	62		36.7587	36.5554	35.69
1703	2017-10-16	11:00:00	77	35.65		67.3023	69	65.4545		36.7704	36.4667	35.5883
1704	2017-10-16	11:30:00	29	35.67		66.4884	65.7727	63		36.7454	36.3787	35.4975
1705	2017-10-16	12:00:00	63	36.31		66.9302	66.0455	64.5455		36.7406	36.3221	35.5158
1706	2017-10-16	12:30:00	83	36.65		67.2558	66.9545	68.3636		36.7477	36.2846	35.6275
1707	2017-10-16	13:00:00	80	36.99		68.6047	67.5217	71.0909		36.7571	36.2612	35.7858
1708	2017-10-16	13:30:00		37.33		68.5	62.0909	72.9		36.7735	36.2533	35.9725
1709	2017-10-16	14:00:00	78	37.78		66.6429	62.8182	75.7		36.8006	36.2675	36.18
1710	2017-10-16	14:30:00	72	36.99		66.2857	63.8182	75		36.81	36.2487	36.3125
1711	2017-10-16	15:00:00	86	36.76		66.6667	65.2273	74.9		36.8146	36.2263	36.4142
1712	2017-10-16	15:30:00	79	36.65		66.9535	65.3636	75.2727		36.8029	36.205	36.4975
1713	2017-10-16	16:00:00	92	36.87		68.0698	67.0455	75.0909		36.7981	36.2	36.6083
1714	2017-10-16	16:30:00	107	36.54		68.6977	69.4545	76.9091		36.7912	36.1862	36.6825
1715	2017-10-16	17:00:00	82	36.65		69.4651	71.4091	77.3636		36.789	36.1771	36.7658
1716	2017-10-16	17:30:00	63	37.1		69.3182	71.7273	80.4545		36.7848	36.1912	36.885
1717	2017-10-16	18:00:00	68	37.1		69.2889	72.7273	80.9091		36.78	36.2333	36.9508
1718	2017-10-16	18:30:00	90	36.99		69.6222	74.9545	81.5455		36.7754	36.3033	36.9792
1719	2017-10-16	19:00:00	79	36.99		70.4889	76.2727	81.4545		36.7779	36.3825	36.9792
1720	2017-10-16	19:30:00	60	37.1		70.5333	76.5909	79.6667		36.7737	36.4662	36.96
1721	2017-10-16	20:00:00	82	37.1		70.9333	78.0455	80		36.7667	36.5417	36.9033
1722	2017-10-16	20:30:00	63	37.04		71.0889	77.3182	79.25		36.7583	36.61	36.9075
1723	2017-10-16	21:00:00	56	36.99		71.6222	75.9091	76.75		36.7442	36.6704	36.9267
1724	2017-10-16	21:30:00	63	36.99		71.2667	75.3478	75.4167		36.73	36.7263	36.955
1725	2017-10-16	22:00:00	86	37.1		71.8889	75	74.9167		36.7177	36.7913	36.9742
1726	2017-10-16	22:30:00	69	37.44		72.0889	74.2174	71.75		36.7106	36.8658	37.0492
1727	2017-10-16	23:00:00	78	37.67		71.6889	74.2609	71.4167		36.7083	36.95	37.1342
1728	2017-10-16	23:30:00	138	37.67		72.5333	79	77.6667		36.706	37.0333	37.1817
1729	2017-10-17	00:00:00	39	37.78		72.1333	77.9565	75.25		36.7083	37.0946	37.2383
1730	2017-10-17	00:30:00	65	37.67		72.1778	77.1739	73.1667		36.7108	37.1371	37.295
1731	2017-10-17	01:00:00	78	37.44		72.3043	77.087	73.0833		36.7085	37.1558	37.3325
1732	2017-10-17	01:30:00	73	37.21		69.8261	76.9167	74.1667		36.7021	37.1508	37.3417
1733	2017-10-17	02:00:00	71	37.33		70.0217	76.625	73.25		36.6998	37.1321	37.3608
1734	2017-10-17	02:30:00	60	37.55		70.2391	76.125	73		36.7021	37.1554	37.4033
1735	2017-10-17	03:00:00	59	37.55		70.3261	75	73.25		36.7073	37.1883	37.45
1736	2017-10-17	03:30:00	51	37.55		69.7826	73.8333	72.25		36.7154	37.2258	37.4967
1737	2017-10-17	04:00:00	65	37.67		70	72.7083	70.5		36.7296	37.2592	37.5442
1738	2017-10-17	04:30:00	49	37.55		69.8913	70.2917	68.8333		36.7437	37.3012	37.5533
1739	2017-10-17	05:00:00	60	37.21		70.3478	69.375	67.3333		36.7508	37.3246	37.515
1740	2017-10-17	05:30:00	56	36.76		70.3478	69.0833	60.5		36.7508	37.3104	37.4392
1741	2017-10-17	06:00:00		36.34		70.8889	69.1304	62.4545		36.756	37.2787	37.3192
1742	2017-10-17	06:30:00	59	36.09		71.2889	67.7826	61.9091		36.7723	37.2413	37.1875
1743	2017-10-17	07:00:00	19	35.76		70.6	65.1739	56.5455		36.7862	37.19	37.0475
1744	2017-10-17	07:30:00		35.65		71	65.4091	54.9		36.7979	37.1296	36.9175
1745	2017-10-17	08:00:00	182	35.51		74	69.9545	66		36.8025	37.0633	36.7658
1746	2017-10-17	08:30:00	46	35.54		73.25	69.1818	64.6		36.8054	37.0008	36.5983
1747	2017-10-17	09:00:00	91	35.31		73.3409	70.7727	67.8		36.8006	36.9308	36.4117
1748	2017-10-17	09:30:00	60	35.76		73.0444	70.6364	68.7		36.8029	36.8796	36.2625
1749	2017-10-17	10:00:00	63	36.31		72.3556	69.5909	68.5		36.819	36.8467	36.1492
1750	2017-10-17	10:30:00	61	36.99		71.7778	69.2273	69.7		36.8469	36.8279	36.1025
1751	2017-10-17	11:00:00	66	37.21		71.5333	68.6818	70.3		36.8794	36.8088	36.1025
1752	2017-10-17	11:30:00		36.31		72.5	65.381	71.8889		36.8927	36.7521	36.065
1753	2017-10-17	12:00:00	61	36.62		72.4545	66.4286	70.8		36.8992	36.7037	36.0883
1754	2017-10-17	12:30:00	69	34.98		72.1364	66.619	71.8		36.8644	36.5917	35.9958
1755	2017-10-17	13:00:00	46	35.2		71.3636	65.0952	74.5		36.8271	36.4983	35.9492
1756	2017-10-17	13:30:00	68	36.31		71.2889	64.8571	73.9091		36.8058	36.4608	36.0042
1757	2017-10-17	14:00:00	14	36.87		69.8667	62.1429	58.6364		36.7869	36.4417	36.1175
1758	2017-10-17	14:30:00	65	36.43		69.7111	62.381	60.3636		36.7752	36.395	36.1917
1759	2017-10-17	15:00:00	86	36.62		69.7111	63.6667	59.9091		36.7723	36.3563	36.3008
1760	2017-10-17	15:30:00	20	36.62		68.4	62.1905	56.2727		36.7717	36.3175	36.3725
1761	2017-10-17	16:00:00		36.43		67.8636	62.05	55.6		36.7625	36.2658	36.3825
1762	2017-10-17	16:30:00	61	36.54		66.8182	62.65	55.6		36.7625	36.2238	36.345
1763	2017-10-17	17:00:00	75	36.54		66.6591	63.4	56.5		36.7602	36.1958	36.2892
1764	2017-10-17	17:30:00		36.99		66.7442	63.7895	56.5		36.7579	36.2054	36.3458
1765	2017-10-17	18:00:00	88	37.1		67.2093	65	59.2		36.7579	36.2371	36.3858
1766	2017-10-17	18:30:00	54	37.1		66.3721	64.75	57.7		36.7602	36.2792	36.5625
1767	2017-10-17	19:00:00	55	37.21		65.814	66.55	58.6		36.7648	36.3396	36.73
1768	2017-10-17	19:30:00	20	37.21		64.8837	64.3333	53.8		36.7671	36.4046	36.805
1769	2017-10-17	20:00:00	108	37.21		65.4884	60.8095	63.2		36.7694	36.4754	36.8333
1770	2017-10-17	20:30:00		37.33		65.5476	61.55	63		36.7754	36.55	36.9083
1771	2017-10-17	21:00:00	97	37.44		66.5238	61.85	64.2222		36.7848	36.6388	36.9767
1772	2017-10-17	21:30:00	54	37.21		66.3095	61.55	68		36.7894	36.6992	37.0258
1773	2017-10-17	22:00:00	70	36.99		65.9286	61.9	68.2		36.7871	36.7275	37.0725
1774	2017-10-17	22:30:00	61	36.76		65.7381	61.9	68.2		36.7729	36.7179	37.0908
1775	2017-10-17	23:00:00	20	37.1		64.3571	59.6	62.7		36.761	36.7133	37.1375
1776	2017-10-17	23:30:00	55	37.33		62.381	59.381	62		36.754	36.7558	37.1658
1777	2017-10-18	00:00:00	60	37.44		62.881	59.3333	59.4545		36.7469	36.79	37.1942
1778	2017-10-18	00:30:00	70	37.55		63	59.381	60.9091		36.7444	36.8971	37.2317
1779	2017-10-18	01:00:00	76	37.55		62.9524	60.8095	62.8182		36.7467	36.995	37.26
1780	2017-10-18	01:30:00	55	37.35		62.5238	60.1905	66		36.7496	37.0383	37.2717
1781	2017-10-18	02:00:00	58	37.21		62.2143	62.2857	61.4545		36.7471	37.0525	37.2717
1782	2017-10-18	02:30:00	74	37.44		62.5476	62.7143	62.5		36.7448	37.0946	37.2808
1783	2017-10-18	03:00:00	58	37.44		62.5238	61.381	59.25		36.7425	37.1287	37.2808
1784	2017-10-18	03:30:00	61	37.55		62.7619	63.3333	59.8333		36.7425	37.1675	37.3092
1785	2017-10-18	04:00:00	47	37.44		62.3333	62.5909	57.9167		36.7377	37.2096	37.3467
1786	2017-10-18	04:30:00	51	37.33		62.381	62.1364	57.0833		36.7331	37.2425	37.3942
1787	2017-10-18	05:00:00	46	37.16		62.0476	60.8182	59.25		36.7321	37.2683	37.3992
1788	2017-10-18	05:30:00	44	36.87		61.7619	60.087	58.3333		36.7344	37.2633	37.3608
1789	2017-10-18	06:00:00	46	36.87		61.3953	58.2609	57.1667		36.7454	37.2538	37.3133
1790	2017-10-18	06:30:00	69	36.09		61.6279	58.913	57.0833		36.7454	37.2117	37.1917
1791	2017-10-18	07:00:00	28	35.42		61.8372	57.7391	53.0833		36.7383	37.1371	37.0142
1792	2017-10-18	07:30:00	61	35.4		61.8182	59.5217	53.5833		36.7331	37.0617	36.8517
1793	2017-10-18	08:00:00	47	35.42		58.75	56.8696	52.6667		36.7312	36.9871	36.7025
1794	2017-10-18	08:30:00	39	35.42		58.5909	56.125	49.75		36.7287	36.9075	36.5342
1795	2017-10-18	09:00:00	70	35.65		58.1136	55	50.75		36.7358	36.8329	36.385
1796	2017-10-18	09:30:00	57	36.09		58.0455	55.125	50.4167		36.7427	36.7862	36.2633
1797	2017-10-18	10:00:00	72	36.43		58.25	55.2083	52.5		36.7452	36.7629	36.1792
1798	2017-10-18	10:30:00	58	36.43		58.1818	55.0833	53.0833		36.7335	36.7492	36.1042
1799	2017-10-18	11:00:00	76	36.76		58.4091	57.4167	55.5833		36.7242	36.735	36.0708
1800	2017-10-18	11:30:00	61	36.99		58.4667	57.6667	57		36.7383	36.7208	36.0808
1801	2017-10-18	12:00:00	60	37.33		58.4444	57.6667	58.1667		36.7531	36.7162	36.1192
1802	2017-10-18	12:30:00	82	37.24		58.7333	58.1667	59.25		36.8002	36.7033	36.215
1803	2017-10-18	13:00:00	83	37.24		59.5556	58.4583	63.8333		36.8427	36.6904	36.3667
1804	2017-10-18	13:30:00	68	37.1		59.5556	59	64.4167		36.8592	36.68	36.5083
1805	2017-10-18	14:00:00	79	37.21		61	59.875	67.0833		36.8663	36.68	36.6575
1806	2017-10-18	14:30:00	92	36.76		61.6	60.625	71.5		36.8731	36.6517	36.7692
1807	2017-10-18	15:00:00		36.54		61.0455	60.7391	71.6364		36.8715	36.6142	36.8433
1808	2017-10-18	15:30:00	110	36.54		63.0909	62.8696	76.4545		36.8698	36.5721	36.8808
1809	2017-10-18	16:00:00	25	36.54		62.2444	61.913	72.1818		36.8721	36.5346	36.89
1810	2017-10-18	16:30:00	54	36.65		62.0889	62.0435	71.8182		36.8744	36.5063	36.9083
1811	2017-10-18	17:00:00	94	36.65		62.5111	64.1304	73.4545		36.8767	36.485	36.8992
1812	2017-10-18	17:30:00	81	36.99		62.913	65.7391	75.2727		36.8767	36.49	36.8992
1813	2017-10-18	18:00:00	80	37.1		62.7391	67.2174	77.0909		36.8767	36.4996	36.88
1814	2017-10-18	18:30:00	69	37.55		63.0652	67.2174	75.9091		36.886	36.5604	36.9058
1815	2017-10-18	19:00:00	88	37.78		63.7826	69.8261	76.3636		36.8979	36.6587	36.9508
1816	2017-10-18	19:30:00	78	37.78		65.0435	70.5652	77.2727		36.9098	36.7579	37.0075
1817	2017-10-18	20:00:00	83	37.89		64.5	72.1304	77.6364		36.924	36.8608	37.0642
1818	2017-10-18	20:30:00	84	37.89		64.9149	74.087	76.9091		36.9356	36.9637	37.1583
1819	2017-10-18	21:00:00	66	38.01		64.2553	73.913	76		36.9475	37.0621	37.2808
1820	2017-10-18	21:30:00	64	38.01		64.4681	74.2174	72.1667		36.9642	37.1421	37.4033
1821	2017-10-18	22:00:00	57	37.89		64.1915	73.5652	74.8333		36.9829	37.2029	37.5158
1822	2017-10-18	22:30:00	79	37.86		64.5745	74.4783	76.9167		37.0058	37.2625	37.6167
1823	2017-10-18	23:00:00	59	37.67		65.4043	73.7391	74		37.0177	37.3004	37.7017
1824	2017-10-18	23:30:00	59	37.67		65.4894	73.6522	72.1667		37.0248	37.3287	37.7583
1825	2017-10-19	00:00:00	69	37.55		65.6809	74.0435	71.25		37.0271	37.3379	37.7958
1826	2017-10-19	00:30:00	72	37.67		65.7234	73.6087	71.5		37.0296	37.3558	37.8058
1827	2017-10-19	01:00:00	52	37.67		65.2128	72.2609	68.5		37.0321	37.3737	37.7967
1828	2017-10-19	01:30:00	84	37.44		65.8298	72.9565	69		37.034	37.3879	37.7683
1829	2017-10-19	02:00:00	77	37.33		66.234	72.8696	68.5		37.0365	37.3929	37.7217
1830	2017-10-19	02:30:00	49	37.21		65.7021	71	65.5833		37.0317	37.4117	37.665
1831	2017-10-19	03:00:00	70	37.1		65.9574	70.9583	65.9167		37.0246	37.435	37.5892
1832	2017-10-19	03:30:00	46	36.99		65.6383	68.2917	64.4167		37.0129	37.4537	37.5042
1833	2017-10-19	04:00:00	51	36.99		65.7234	69.375	63.9167		37.0035	37.4725	37.4292
1834	2017-10-19	04:30:00	41	36.76		65.5106	68.8333	60.75		36.9917	37.4771	37.3375
1835	2017-10-19	05:00:00	46	36.76		65.5106	66.8333	59.6667		36.9833	37.4817	37.2617
1836	2017-10-19	05:30:00	48	36.54		65.5957	65.4583	58.75		36.9765	37.4629	37.1675
1837	2017-10-19	06:00:00	54	35.87		65.766	64.375	57.5		36.9556	37.4117	37.0275
1838	2017-10-19	06:30:00	31	35.31		64.9574	62.7917	54.0833		36.9394	37.3183	36.8308
1839	2017-10-19	07:00:00	66	35.2		65.766	61.875	55.25		36.9348	37.2108	36.625
1840	2017-10-19	07:30:00	66	35.31		65.8723	61.375	53.75		36.9329	37.1079	36.4475
1841	2017-10-19	08:00:00	68	35.31		66.3191	60.75	53		36.9306	37.0004	36.2792
1842	2017-10-19	08:30:00	79	35.54		67.1702	60.5417	55.5		36.9331	36.9025	36.14
1843	2017-10-19	09:00:00	64	35.98		67.0426	60.4583	55		36.94	36.8179	36.0467
1844	2017-10-19	09:30:00	67	36.2		67.2553	60.5833	56.75		36.9423	36.7425	35.9808
1845	2017-10-19	10:00:00	59	36.54		66.9787	60.6667	57.4167		36.9446	36.6863	35.9433
1846	2017-10-19	10:30:00	80	36.76		67.4468	60.7083	60.6667		36.9515	36.6404	35.9433
1847	2017-10-19	11:00:00	77	36.99		67.4681	61.4583	63.25		36.9562	36.6121	35.9625
1848	2017-10-19	11:30:00	85	36.87		67.9787	62.5417	66.3333		36.9537	36.5787	35.99
1849	2017-10-19	12:00:00	45	36.09		67.6596	61.5417	65.5833		36.9279	36.5179	36.0083
1850	2017-10-19	12:30:00	107	36.31		68.1915	63	71.9167		36.9085	36.4612	36.0917
1851	2017-10-19	13:00:00	46	36.54		67.4043	62.75	70.25		36.894	36.4142	36.2033
1852	2017-10-19	13:30:00	82	36.54		67.7021	62.6667	71.5833		36.8823	36.3767	36.3058
1853	2017-10-19	14:00:00	51	36.54		67.1064	61.5833	70.1667		36.8683	36.3438	36.4083
1854	2017-10-19	14:30:00	48	36.65		66.1702	61.5417	67.5833		36.866	36.3204	36.5008
1855	2017-10-19	15:00:00	48	36.65		65.7917	60.625	66.25		36.8683	36.3017	36.5567
1856	2017-10-19	15:30:00	50	36.65		64.5417	60.7917	64.8333		36.8706	36.2875	36.5942
1857	2017-10-19	16:00:00	30	36.76		64.6458	59.9167	62.4167		36.8752	36.2779	36.6125
1858	2017-10-19	16:30:00		36.76		64.8723	60.7391	60.8182		36.8775	36.2779	36.6125
1859	2017-10-19	17:00:00	101	36.54		65.0213	63.1304	63		36.8752	36.2687	36.575
1860	2017-10-19	17:30:00	81	36.54		65.0213	64.5652	62.6364		36.8658	36.2687	36.5475
1861	2017-10-19	18:00:00	61	36.76		64.617	64.8696	64.0909		36.8587	36.3058	36.6033
1862	2017-10-19	18:30:00	76	36.76		64.766	66.8261	61.2727		36.8423	36.3663	36.6408
1863	2017-10-19	19:00:00	65	37.1		64.2766	66.7826	63		36.8281	36.4454	36.6875
1864	2017-10-19	19:30:00		37.33		63.9783	66.8182	61.1		36.8187	36.5296	36.7533
1865	2017-10-19	20:00:00	60	37.44		63.4783	66.4545	62		36.8094	36.6183	36.8283
1866	2017-10-19	20:30:00	83	37.44		63.4565	66.6364	65.5		36.8	36.6975	36.8942
1867	2017-10-19	21:00:00	65	37.44		63.4348	66.6818	67.2		36.7881	36.7583	36.96
1868	2017-10-19	21:30:00	52	37.33		63.1739	66	67.4		36.774	36.8054	37.0167
1869	2017-10-19	22:00:00	50	37.33		63.0217	65.5909	69.4		36.7623	36.8383	37.0642
1870	2017-10-19	22:30:00	55	37.1		62.5	64.4545	68.0909		36.7465	36.8525	37.0925
1871	2017-10-19	23:00:00	54	37.21		62.3913	63.4091	63.8182		36.7369	36.8617	37.1483
1872	2017-10-19	23:30:00	59	37.3		62.3913	62.2273	61.8182		36.7292	36.8796	37.2117
1873	2017-10-20	00:00:00	59	37.21		62.1739	62.8636	61.6364		36.7221	36.9263	37.2492
1874	2017-10-20	00:30:00	59	37.33		61.8913	60.6818	60.0909		36.715	36.9688	37.2967
1875	2017-10-20	01:00:00	61	37.3		62.087	61.3636	59.7273		36.7073	37.0004	37.3133
1876	2017-10-20	01:30:00	59	37.33		61.5435	60.3182	59.6667		36.705	37.0333	37.3133
1877	2017-10-20	02:00:00	60	37.21		61.1739	60.7273	59.6667		36.7025	37.0613	37.2942
1878	2017-10-20	02:30:00	64	37.21		61.5	61.4545	58.0833		36.7025	37.0846	37.275
1879	2017-10-20	03:00:00	54	37.21		61.1522	61.7273	57.1667		36.7048	37.1079	37.2558
1880	2017-10-20	03:30:00	45	37.21		61.1304	61.5	56.5833		36.7094	37.1313	37.2458
1881	2017-10-20	04:00:00	52	37.1		61.1522	62.5	56.75		36.7117	37.1454	37.2267
1882	2017-10-20	04:30:00	38	37.1		61.087	61.4348	55.3333		36.7187	37.1596	37.2267
1883	2017-10-20	05:00:00		36.99		61.4222	59.6364	55.4545		36.7235	37.1783	37.2083
1884	2017-10-20	05:30:00		36.87		61.7273	58.619	55.1		36.7304	37.1921	37.1725
1885	2017-10-20	06:00:00	48	36.87		61.5909	58	54		36.7512	37.1967	37.1442
1886	2017-10-20	06:30:00	75	36.09		62.5909	57.9524	55.6		36.7675	37.1688	37.0408
1887	2017-10-20	07:00:00	80	35.42		62.9091	58.6667	57.5		36.7721	37.0988	36.8842
1888	2017-10-20	07:30:00		35.31		62.8372	58.6667	57.3333		36.7721	37.0146	36.7158
1889	2017-10-20	08:00:00	72	35.31		62.9302	59.2381	58.6667		36.7721	36.9258	36.5575
1890	2017-10-20	08:30:00	75	35.31		62.8372	58.8571	59.8889		36.7673	36.8371	36.3992
1891	2017-10-20	09:00:00	51	35.42		62.5349	58.1905	59.5556		36.7556	36.7529	36.25
1892	2017-10-20	09:30:00	60	35.98		62.3721	58.5714	61.2222		36.751	36.6967	36.1475
1893	2017-10-20	10:00:00	64	36.09		62.4884	59.2381	62.5556		36.7417	36.645	36.0633
1894	2017-10-20	10:30:00	68	36.31		62.2093	59.8571	65.8889		36.7323	36.6121	35.9975
1895	2017-10-20	11:00:00	85	36.65		62.3953	61.3333	67.8		36.7252	36.5887	35.9692
1896	2017-10-20	11:30:00	60	36.99		61.814	61.381	67.0909		36.7277	36.5758	35.9792
1897	2017-10-20	12:00:00	74	37.16		62.4884	62.0952	69.4545		36.75	36.5737	36.0033
1898	2017-10-20	12:30:00	44	36.54		61.0233	61.381	66.6364		36.7548	36.5408	36.0408
1899	2017-10-20	13:00:00	24	36.43		60.5116	59.619	61.5455		36.7525	36.5046	36.125
1900	2017-10-20	13:30:00		36.65		60	59.65	61.5455		36.7548	36.4762	36.2367
1901	2017-10-20	14:00:00	73	36.54		60.5238	60.3	61.6364		36.7548	36.4483	36.3392
1902	2017-10-20	14:30:00	59	36.76		60.7857	60.05	60.1818		36.7571	36.4296	36.46
1903	2017-10-20	15:00:00	98	36.82		61.9762	62.25	64.4545		36.7606	36.4133	36.5767
1904	2017-10-20	15:30:00	41	36.76		61.7619	62.05	62.7273		36.7629	36.3946	36.6417
1905	2017-10-20	16:00:00	47	36.09		62.1667	61.8	61.1818		36.749	36.3525	36.6417
1906	2017-10-20	16:30:00	51	36.2		61.907	62.45	59.6364		36.7373	36.315	36.6325
1907	2017-10-20	17:00:00	91	36.09		61.6744	63.8095	60.1818		36.7279	36.2775	36.5858
1908	2017-10-20	17:30:00	79	36.76		61.6279	64.5	61.9091		36.7325	36.2729	36.5667
1909	2017-10-20	18:00:00	90	37.33		62.3023	66.4091	63.3636		36.7444	36.2921	36.5808
1910	2017-10-20	18:30:00	61	37.44		61.9535	65.7727	64.9091		36.7585	36.3483	36.6558
1911	2017-10-20	19:00:00	58	37.21		61.7907	64.7727	68		36.7608	36.4229	36.7208
1912	2017-10-20	19:30:00	57	36.87		61.6818	64.4348	67.0833		36.7512	36.4879	36.7392
1913	2017-10-20	20:00:00	56	36.99		61.5909	63.7391	65.6667		36.7419	36.5579	36.7767
1914	2017-10-20	20:30:00	63	37.21		61.1364	63.2174	66		36.7371	36.6371	36.8142
1915	2017-10-20	21:00:00	60	37.44		61.0227	63.6087	62.8333		36.7371	36.7213	36.8658
1916	2017-10-20	21:30:00	35	37.5		60.6364	62.5217	62.3333		36.7406	36.7846	36.9275
1917	2017-10-20	22:00:00	61	37.55		60.8864	62.3913	63.5		36.7452	36.8454	37.0492
1918	2017-10-20	22:30:00	62	37.55		61.0455	62.1304	64.4167		36.7546	36.8971	37.1617
1919	2017-10-20	23:00:00	60	37.67		61.1818	61.0435	61.8333		36.7642	36.9396	37.2933
1920	2017-10-20	23:30:00	64	37.55		61.2955	61.2174	60.5833		36.7694	36.9629	37.3592
1921	2017-10-21	00:00:00	54	37.55		61.1818	60.3478	57.5833		36.7765	36.9792	37.3775
1922	2017-10-21	00:30:00		37.33		61.2326	61.0909	57.2727		36.7765	37.0121	37.3683
1923	2017-10-21	01:00:00	61	37.1		61.2326	62.7727	57.5455		36.7723	37.04	37.3592
1924	2017-10-21	01:30:00	68	36.79		61.4419	63	58.5455		36.761	37.0458	37.3525
1925	2017-10-21	02:00:00		36.87		61.4762	62.5455	58.8		36.754	37.0596	37.3425
1926	2017-10-21	02:30:00	70	36.87		61.619	63.0455	59.5		36.7469	37.0642	37.3142
1927	2017-10-21	03:00:00		36.87		61.8049	61.381	59.4444		36.7398	37.0662	37.2667
1928	2017-10-21	03:30:00	67	36.76		62.3415	62.619	63		36.7304	37.0662	37.205
1929	2017-10-21	04:00:00	52	36.76		62.3415	62.8571	62		36.7233	37.0942	37.1392
1930	2017-10-21	04:30:00	47	36.76		62.561	62.6667	60.3333		36.7162	37.1175	37.0733
1931	2017-10-21	05:00:00	66	36.76		62.6429	61.4762	61		36.7115	37.1454	36.9975
1932	2017-10-21	05:30:00	48	36.54		62.3023	60	59.2222		36.7046	37.1362	36.9133
1933	2017-10-21	06:00:00	42	36.31		62.1628	57.7143	57.8889		36.6929	37.0938	36.81
1934	2017-10-21	06:30:00	88	35.87		62.4651	59	60.9		36.6883	37.0283	36.6883
1935	2017-10-21	07:00:00	25	35.42		61.186	57.4286	57.3		36.6883	36.9537	36.5483
1936	2017-10-21	07:30:00	110	35.31		62.2955	59.9524	61.5		36.6883	36.8887	36.425
1937	2017-10-21	08:00:00	46	35.31		61.7045	59.4762	60.0909		36.6883	36.8187	36.295
1938	2017-10-21	08:30:00	178	35.42		64.0455	64.9524	69.9091		36.6906	36.7442	36.1742
1939	2017-10-21	09:00:00	53	35.42		64.0909	64.619	68.5		36.6906	36.66	36.0533
1940	2017-10-21	09:30:00	66	35.98		64.2273	66.0952	68.4167		36.6906	36.5967	35.9883
1941	2017-10-21	10:00:00	75	36.26		64.4773	66.7619	70.3333		36.6942	36.5429	35.9467
1942	2017-10-21	10:30:00	74	36.43		64.6136	67.3333	72.5833		36.6967	36.4962	35.9192
1943	2017-10-21	11:00:00	91	36.87		64.75	68.8095	74.6667		36.7012	36.4629	35.9283
1944	2017-10-21	11:30:00	61	36.99		64.7727	68.6667	75.75		36.7012	36.4396	35.9658
1945	2017-10-21	12:00:00	77	37.41		64.8409	69.7619	78.6667		36.7065	36.4337	36.0575
1946	2017-10-21	12:30:00	73	37.44		65.5	69.9091	77.4167		36.7252	36.4383	36.1883
1947	2017-10-21	13:00:00	42	36.76		65.9091	69.0455	78.8333		36.7321	36.4242	36.3
1948	2017-10-21	13:30:00	51	36.54		65.5778	68.2727	73.9167		36.7298	36.4137	36.4025
1949	2017-10-21	14:00:00		36.65		65.4091	68.2727	76.4545		36.7321	36.4046	36.5142
1950	2017-10-21	14:30:00	97	36.76		66.2727	69.5	69.0909		36.7321	36.4	36.6258
1951	2017-10-21	15:00:00	96	36.54		66.2273	70.6522	73		36.7263	36.3862	36.7192
1952	2017-10-21	15:30:00	91	36.65		67.3636	71.6957	75.2727		36.724	36.3817	36.775
1953	2017-10-21	16:00:00	93	36.76		68.4091	73.4783	76.9091		36.7379	36.3817	36.8167
1954	2017-10-21	16:30:00	49	36.76		68.3636	73.5652	74.6364		36.7496	36.3817	36.8442
1955	2017-10-21	17:00:00	166	36.87		70.0682	77.913	81.4545		36.7658	36.3862	36.8442
1956	2017-10-21	17:30:00	80	37.1		70.0909	79.3043	83.1818		36.7729	36.4096	36.8533
1957	2017-10-21	18:00:00	68	36.79		69.5909	80.4348	82.3636		36.7617	36.4296	36.8017
1958	2017-10-21	18:30:00		36.76		69.7907	80.0909	83.3		36.7475	36.4667	36.745
1959	2017-10-21	19:00:00	77	36.65		70.2326	82.4545	86.8		36.7358	36.5179	36.7358
1960	2017-10-21	19:30:00		36.54		70.5476	81.1429	90.7778		36.729	36.5692	36.7358
1961	2017-10-21	20:00:00	59	36.54		70.619	81.7619	87.6		36.7196	36.6204	36.7267
1962	2017-10-21	20:30:00	60	36.65		70.5476	76.1429	83.9		36.7079	36.6717	36.7175
1963	2017-10-21	21:00:00	55	36.54		70.4286	76.2381	79.8		36.6892	36.7183	36.7175
1964	2017-10-21	21:30:00	49	36.43		70.7619	75.4286	75.6		36.6669	36.7371	36.6992
1965	2017-10-21	22:00:00	178	36.31		73.5476	80.3333	84.1		36.641	36.7392	36.6617
1966	2017-10-21	22:30:00		36.54		73.8293	80.65	88		36.62	36.7437	36.6433
1967	2017-10-21	23:00:00	53	36.65		73.6585	78.75	75.4444		36.5987	36.7346	36.625
1968	2017-10-21	23:30:00	52	36.99		73.3659	78.3	72.3333		36.5871	36.7346	36.6158
1969	2017-10-22	00:00:00	55	37.1		73.3902	77.2	70.8889		36.5777	36.7217	36.6417
1970	2017-10-22	00:30:00	61	37.33		73.0952	76.6	69.9		36.5777	36.7171	36.6892
1971	2017-10-22	01:00:00	55	37.33		72.9524	77.25	67.7		36.5825	36.7408	36.7458
1972	2017-10-22	01:30:00	61	37.41		72.7857	77.75	67.0909		36.5954	36.7771	36.8183
1973	2017-10-22	02:00:00	14	37.33		71.4186	74.7143	63		36.605	36.8054	36.8842
1974	2017-10-22	02:30:00	51	37.44		70.9767	72.5238	62.1818		36.6169	36.8338	36.95
1975	2017-10-22	03:00:00	70	37.21		70.9545	71.2857	63.5455		36.624	36.8617	37.0058
1976	2017-10-22	03:30:00	125	36.99		72.2727	72.9048	70.4545		36.6287	36.8758	37.0525
1977	2017-10-22	04:00:00	79	36.76		72.8864	72.2381	61.4545		36.6287	36.8758	37.09
1978	2017-10-22	04:30:00	42	36.54		72.7727	71.9048	59.8333		36.6242	36.8667	37.09
1979	2017-10-22	05:00:00	50	36.2		72.4091	66.381	59.5833		36.6125	36.8388	37.0525
1980	2017-10-22	05:30:00	47	35.87		72.3864	64.8095	59.1667		36.5985	36.7875	36.9592
1981	2017-10-22	06:00:00	52	35.87		72.6136	64.0476	58.9167		36.5894	36.7492	36.8567
1982	2017-10-22	06:30:00	64	35.31		72.0682	64.0455	59.1667		36.5777	36.6887	36.6883
1983	2017-10-22	07:00:00	47	35.2		72.5682	62.6818	58.5		36.5731	36.6283	36.5108
1984	2017-10-22	07:30:00	67	35.31		71.5909	62.8696	59		36.5731	36.5771	36.3358
1985	2017-10-22	08:00:00	65	35.42		72.0227	63.1304	63.25		36.5754	36.5304	36.1767
1986	2017-10-22	08:30:00	108	35.65		70.4318	65.2174	68		36.5802	36.4887	36.0275
1987	2017-10-22	09:00:00	72	35.65		70.8636	65.9565	68.1667		36.585	36.4517	35.8975
1988	2017-10-22	09:30:00	60	35.98		70.7273	66.4348	62.75		36.585	36.4329	35.8133
1989	2017-10-22	10:00:00	72	36.2		70.6591	61.8261	62.1667		36.5837	36.4283	35.7667
1990	2017-10-22	10:30:00	79	36.65		70.7727	62.5417	65.25		36.5883	36.4329	35.7758
1991	2017-10-22	11:00:00	75	37.21		70.4091	63.4583	67.3333		36.5954	36.4563	35.86
1992	2017-10-22	11:30:00	64	37.41		70.4773	63.9583	68.75		36.6042	36.4738	35.9883
1993	2017-10-22	12:00:00	77	37.67		70.4773	64.875	70.8333		36.6096	36.4975	36.1383
1994	2017-10-22	12:30:00		37.69		70.4186	65.0435	71.4545		36.6148	36.5125	36.3367
1995	2017-10-22	13:00:00	80	37.55		71.3023	66.1304	74.4545		36.6313	36.5217	36.5325
1996	2017-10-22	13:30:00	70	36.99		71.7442	66.5217	74.7273		36.6406	36.5042	36.6725
1997	2017-10-22	14:00:00	94	36.87		72.25	70	77.3636		36.6452	36.485	36.7933
1998	2017-10-22	14:30:00	92	36.99		72.1364	71.7826	75.9091		36.65	36.4662	36.905
1999	2017-10-22	15:00:00	45	37.1		70.9773	70.6957	73.4545		36.6617	36.4617	37.0258
[truncated: 7,498 more rows]

## Sheet: No.13
No	Date	Time	Heart rate(bpm)	Temp(°C)		HR 24h average	HR 12h average	HR 6h average		Tb 24h average	Tb 12h average	Tb 6h average
1	2017-09-12	00:00:00	57	36.31
2	2017-09-12	00:30:00	36	36.2
3	2017-09-12	01:00:00	64	35.98
4	2017-09-12	01:30:00	20	35.65
5	2017-09-12	02:00:00	46	35.43
6	2017-09-12	02:30:00	51	34.77
7	2017-09-12	03:00:00	39	34.88
8	2017-09-12	03:30:00	66	35.1
9	2017-09-12	04:00:00	55	35.32
10	2017-09-12	04:30:00	61	35.54
11	2017-09-12	05:00:00	44	35.76
12	2017-09-12	05:30:00	60	35.76				49.9167				35.5583
13	2017-09-12	06:00:00	107	34.99				54.0833				35.4483
14	2017-09-12	06:30:00	78	35.32				57.5833				35.375
15	2017-09-12	07:00:00	131	35.65				63.1667				35.3475
16	2017-09-12	07:30:00	18	35.76				63				35.3567
17	2017-09-12	08:00:00	84	35.87				66.1667				35.3933
18	2017-09-12	08:30:00	90	35.98				69.4167				35.4942
19	2017-09-12	09:00:00	75	36.09				72.4167				35.595
20	2017-09-12	09:30:00	20	36.43				68.5833				35.7058
21	2017-09-12	10:00:00	78	36.43				70.5				35.7983
22	2017-09-12	10:30:00	86	36.54				72.5833				35.8817
23	2017-09-12	11:00:00	80	36.54				75.5833				35.9467
24	2017-09-12	11:30:00	40	36.54			61.9167	73.9167			35.785	36.0117
25	2017-09-12	12:00:00		37.35			62.1304	70.9091			35.8283	36.2083
26	2017-09-12	12:30:00	50	37.38			62.7391	68.3636			35.8775	36.38
27	2017-09-12	13:00:00	102	37.32			64.3913	65.7273			35.9333	36.5192
28	2017-09-12	13:30:00	96	37.66			67.6957	72.8182			36.0171	36.6775
29	2017-09-12	14:00:00	159	37.43			72.6087	79.6364			36.1004	36.8075
30	2017-09-12	14:30:00	67	37.66			73.3043	77.5455			36.2208	36.9475
31	2017-09-12	15:00:00	57	37.89			74.087	75.9091			36.3462	37.0975
32	2017-09-12	15:30:00	79	37.21			74.6522	81.2727			36.4342	37.1625
33	2017-09-12	16:00:00	92	37.1			76.2609	82.5455			36.5083	37.2183
34	2017-09-12	16:30:00	72	37.1			76.7391	81.2727			36.5733	37.265
35	2017-09-12	17:00:00	73	37.32			78	80.6364			36.6383	37.33
36	2017-09-12	17:30:00	98	37.43			79.6522	85.9091			36.7079	37.4042
37	2017-09-12	18:00:00	70	37.43			78.0435	84.5833			36.8096	37.4108
38	2017-09-12	18:30:00	94	37.43			78.7391	88.25			36.8975	37.415
39	2017-09-12	19:00:00	107	36.98			77.6957	88.6667			36.9529	37.3867
40	2017-09-12	19:30:00	83	37.32			80.5217	87.5833			37.0179	37.3583
41	2017-09-12	20:00:00	84	37.32			80.5217	81.3333			37.0783	37.3492
42	2017-09-12	20:30:00	73	37.1			79.7826	81.8333			37.125	37.3025
43	2017-09-12	21:00:00	56	36.76			78.9565	81.75			37.1529	37.2083
44	2017-09-12	21:30:00	63	36.98			80.8261	80.4167			37.1758	37.1892
45	2017-09-12	22:00:00	69	36.87			80.4348	78.5			37.1942	37.17
46	2017-09-12	22:30:00	61	37.1			79.3478	77.5833			37.2175	37.17
47	2017-09-12	23:00:00	68	36.98			78.8261	77.1667			37.2358	37.1417
48	2017-09-12	23:30:00	102	37.32		71.5106	81.5217	77.5		36.5267	37.2683	37.1325
49	2017-09-13	00:00:00	83	36.87		72.0638	81.5833	78.5833		36.5383	37.2483	37.0858
50	2017-09-13	00:30:00	82	37.32		73.0426	82.9167	77.5833		36.5617	37.2458	37.0767
51	2017-09-13	01:00:00	85	37.32		73.4894	37.2458	75.75		36.5896	37.2458	37.105
52	2017-09-13	01:30:00	56	37.24		74.2553	37.2283	37.0983		36.6227	37.2283	37.0983
53	2017-09-13	02:00:00	98	37.21		75.3617	37.2192	37.0892		36.6598	37.2192	37.0892
54	2017-09-13	02:30:00	76	37.1		75.8936	78.375	74.9167		36.7083	37.1958	37.0892
55	2017-09-13	03:00:00	75	36.98		76.6596	79.125	76.5		36.7521	37.1579	37.1075
56	2017-09-13	03:30:00	63	36.87		76.5957	78.4583	76.5		36.789	37.1438	37.0983
57	2017-09-13	04:00:00	78	36.98		77.0851	37.1388	77.25		36.8235	37.1388	37.1075
58	2017-09-13	04:30:00	91	37.21		77.7234	37.1433	37.1167		36.8583	37.1433	37.1167
59	2017-09-13	05:00:00	87	37.21		78.6383	37.1388	37.1358		36.8885	37.1388	37.1358
60	2017-09-13	05:30:00	76	36.43		78.9787	78.3333	79.1667		36.9025	37.0971	37.0617
61	2017-09-13	06:00:00	72	37.32		78.234	78.4167	78.25		36.951	37.0925	37.0992
62	2017-09-13	06:30:00	57	37.21		77.7872	76.875	76.1667		36.9904	37.0833	37.09
63	2017-09-13	07:00:00	78	37.1		76.6596	37.0883	75.5833		37.0206	37.0883	37.0717
64	2017-09-13	07:30:00	91	36.98		78.2128	37.0742	37.05		37.046	37.0742	37.05
65	2017-09-13	08:00:00	89	36.31		78.3191	37.0321	36.975		37.0552	37.0321	36.975
66	2017-09-13	08:30:00	60	36.31		77.6809	75.6667	76.4167		37.0621	36.9992	36.9092
67	2017-09-13	09:00:00	57	36.43		77.2979	75.7083	74.9167		37.0692	36.9854	36.8633
68	2017-09-13	09:30:00	58	36.54		78.1064	75.5	74.5		37.0715	36.9671	36.8358
69	2017-09-13	10:00:00	57	36.54		77.6596	36.9533	72.75		37.0737	36.9533	36.7992
70	2017-09-13	10:30:00	69	36.65		77.2979	36.9346	36.7525		37.076	36.9346	36.7525
71	2017-09-13	11:00:00	93	36.54		77.5745	36.9162	36.6967		37.076	36.9162	36.6967
72	2017-09-13	11:30:00	96	36.76		78.766	76.125	73.0833		37.0806	36.8929	36.7242
73	2017-09-13	12:00:00	91	36.98		79.0208	76.4583	74.6667		37.0729	36.8975	36.6958
74	2017-09-13	12:30:00	93	36.98		79.9167	76.9167	77.6667		37.0646	36.8833	36.6767
75	2017-09-13	13:00:00	91	37.43		79.6875	36.8879	78.75		37.0669	36.8879	36.7042
76	2017-09-13	13:30:00	87	37.1		79.5	36.8821	36.7142		37.0552	36.8821	36.7142
77	2017-09-13	14:00:00	159	37.32		79.5	36.8867	36.7983		37.0529	36.8867	36.7983
78	2017-09-13	14:30:00	117	37.43		80.5417	82.7083	89		37.0481	36.9004	36.8917
79	2017-09-13	15:00:00	101	37.21		81.4583	83.7917	92.6667		37.034	36.91	36.9567
80	2017-09-13	15:30:00	100	37.32		81.8958	85.3333	96.1667		37.0363	36.9288	37.0217
81	2017-09-13	16:00:00	100	37.29		82.0625	36.9417	99.75		37.0402	36.9417	37.0842
82	2017-09-13	16:30:00	98	37.41		82.6042	36.95	37.1475		37.0467	36.95	37.1475
83	2017-09-13	17:00:00	91	37.43		82.9792	36.9592	37.2217		37.049	36.9592	37.2217
84	2017-09-13	17:30:00	84	37.66		82.6875	87.0417	101		37.0538	37.0104	37.2967
85	2017-09-13	18:00:00	88	37.55		83.0625	87.7083	100.75		37.0563	37.02	37.3442
86	2017-09-13	18:30:00	111	37.43		83.4167	89.9583	102.25		37.0563	37.0292	37.3817
87	2017-09-13	19:00:00	91	37.77		83.0833	37.0571	102.25		37.0727	37.0571	37.41
88	2017-09-13	19:30:00	86	37.66		83.1458	37.0854	37.4567		37.0798	37.0854	37.4567
89	2017-09-13	20:00:00	87	37.43		83.2083	37.1321	37.4658		37.0821	37.1321	37.4658
90	2017-09-13	20:30:00	100	37.55		83.7708	91.875	94.75		37.0915	37.1837	37.4758
91	2017-09-13	21:00:00	101	37.66		84.7083	93.7083	94.75		37.1102	37.235	37.5133
92	2017-09-13	21:30:00	64	37.77		84.7292	93.9583	91.75		37.1267	37.2862	37.5508
93	2017-09-13	22:00:00	98	37.66		85.3333	37.3329	91.5833		37.1431	37.3329	37.5817
94	2017-09-13	22:30:00	88	37.77		85.8958	37.3796	37.6117		37.1571	37.3796	37.6117
95	2017-09-13	23:00:00	86	37.52		86.2708	37.4204	37.6192		37.1683	37.4204	37.6192
96	2017-09-13	23:30:00	79	37.43		85.7917	95.4583	89.9167		37.1706	37.4483	37.6
97	2017-09-14	00:00:00	87	37.43		85.875	95.2917	89.8333		37.1823	37.4671	37.59
98	2017-09-14	00:30:00	113	37.55		86.5208	96.125	90		37.1871	37.4908	37.6
99	2017-09-14	01:00:00	97	37.32		86.7708	37.4862	90.5		37.1871	37.4862	37.5625
100	2017-09-14	01:30:00	81	37.55		87.2917	37.505	37.5533		37.1935	37.505	37.5533
101	2017-09-14	02:00:00	81	37.55		86.9375	37.5146	37.5633		37.2006	37.5146	37.5633
102	2017-09-14	02:30:00	96	37.55		87.3542	92	89.25		37.21	37.5196	37.5633
103	2017-09-14	03:00:00	81	37.43		87.4792	91.1667	87.5833		37.2194	37.5287	37.5442
104	2017-09-14	03:30:00	70	37.55		87.625	89.9167	88.0833		37.2335	37.5383	37.5258
105	2017-09-14	04:00:00	70	37.21		87.4583	37.535	85.75		37.2383	37.535	37.4883
106	2017-09-14	04:30:00	76	37.43		87.1458	37.5358	37.46		37.2429	37.5358	37.46
107	2017-09-14	05:00:00	88	37.55		87.1667	37.5408	37.4625		37.25	37.5408	37.4625
108	2017-09-14	05:30:00	43	37.32		86.4792	85.9167	81.9167		37.2685	37.5267	37.4533
109	2017-09-14	06:00:00	57	37.32		86.1667	84.625	79.4167		37.2685	37.5171	37.4442
110	2017-09-14	06:30:00	73	36.87		86.5	83.0417	76.0833		37.2615	37.4937	37.3875
111	2017-09-14	07:00:00	64	36.62		86.2083	37.4458	73.3333		37.2515	37.4458	37.3292
112	2017-09-14	07:30:00	88	36.54		86.1458	37.3992	37.245		37.2423	37.3992	37.245
113	2017-09-14	08:00:00	104	36.56		86.4583	37.3629	37.1625		37.2475	37.3629	37.1625
114	2017-09-14	08:30:00	58	36.54		86.4167	80.9583	72.6667		37.2523	37.3208	37.0783
115	2017-09-14	09:00:00		36.54		87.0426	80.087	71.9091		37.2546	37.2742	37.0042
116	2017-09-14	09:30:00		36.54		87.6739	80.8182	72.1		37.2546	37.2229	36.92
117	2017-09-14	10:00:00	89	36.54		88.3696	37.1763	74		37.2546	37.1763	36.8642
118	2017-09-14	10:30:00		36.54		88.8	37.125	36.79		37.2523	37.125	36.79
119	2017-09-14	11:00:00	34	36.9		87.4889	37.0992	36.7358		37.2598	37.0992	36.7358
120	2017-09-14	11:30:00	85	36.87		87.2444	77.8571	72.4444		37.2621	37.0758	36.6983
121	2017-09-14	12:00:00	21	36.65		85.6889	74.7143	68.4444		37.2552	37.0433	36.6425
122	2017-09-14	12:30:00	111	36.76		86.0889	74.619	72.6667		37.2506	37.0104	36.6333
123	2017-09-14	13:00:00	119	36.76		86.7111	36.9871	78.7778		37.2367	36.9871	36.645
124	2017-09-14	13:30:00	61	36.76		86.1333	36.9542	36.6633		37.2296	36.9542	36.6633
125	2017-09-14	14:00:00	120	37.32		85.2667	36.9446	36.7267		37.2296	36.9446	36.7267
126	2017-09-14	14:30:00	33	37.55		83.4	73.5714	74.7778		37.2321	36.9446	36.8108
127	2017-09-14	15:00:00	75	37.32		82.8222	73.2857	74.8		37.2344	36.94	36.8758
128	2017-09-14	15:30:00	92	37.1		82.6444	74.3333	76.3636		37.2298	36.9213	36.9225
129	2017-09-14	16:00:00	115	37.1		82.9778	36.9167	78.7273		37.2258	36.9167	36.9692
130	2017-09-14	16:30:00	48	37.21		81.8667	36.9075	37.025		37.2217	36.9075	37.025
131	2017-09-14	17:00:00	47	37.1		80.8889	36.8888	37.0417		37.2148	36.8888	37.0417
132	2017-09-14	17:30:00	104	37.32		81.3333	76.0952	78.8333		37.2077	36.8888	37.0792
133	2017-09-14	18:00:00	104	37.43		81.6889	78.3333	85.75		37.2052	36.8933	37.1442
134	2017-09-14	18:30:00	101	37.43		81.4667	79.6667	84.9167		37.2052	36.9167	37.2
135	2017-09-14	19:00:00	77	37.32		81.1556	36.9458	81.4167		37.1958	36.9458	37.2467
136	2017-09-14	19:30:00	91	37.43		81.2667	36.9829	37.3025		37.191	36.9829	37.3025
137	2017-09-14	20:00:00	91	37.1		81.3556	37.0054	37.2842		37.1842	37.0054	37.2842
138	2017-09-14	20:30:00	94	37.21		81.2222	81.5238	86.5833		37.1771	37.0333	37.2558
139	2017-09-14	21:00:00		37.55		80.7727	81.5238	87.6364		37.1748	37.0754	37.275
140	2017-09-14	21:30:00	96	37.43		81.5	82.1818	88		37.1677	37.1125	37.3025
141	2017-09-14	22:00:00	104	37.32		81.6364	37.145	87		37.1606	37.145	37.3208
142	2017-09-14	22:30:00	96	37.55		81.8182	37.1871	37.3492		37.156	37.1871	37.3492
143	2017-09-14	23:00:00	125	37.43		82.7045	37.2092	37.3767		37.1542	37.2092	37.3767
144	2017-09-14	23:30:00	93	37.43		83.0227	87.7391	97.4545		37.1542	37.2325	37.3858
145	2017-09-15	00:00:00	88	37.43		83.0455	90.6522	96		37.1542	37.265	37.3858
146	2017-09-15	00:30:00	86	37.43		82.4318	89.5652	94.6364		37.1517	37.2929	37.3858
147	2017-09-15	01:00:00	74	37.55		81.9091	37.3258	94.3636		37.1565	37.3258	37.405
148	2017-09-15	01:30:00	78	37.66		81.8409	37.3633	37.4242		37.1587	37.3633	37.4242
149	2017-09-15	02:00:00	65	37.55		81.4773	37.3729	37.4617		37.1587	37.3729	37.4617
150	2017-09-15	02:30:00	98	37.46		81.5227	88.7826	91.1818		37.1569	37.3692	37.4825
151	2017-09-15	03:00:00	59	37.32		81.0227	88.087	88.5		37.1546	37.3692	37.4633
152	2017-09-15	03:30:00	59	37.1		80.7727	86.6522	85.4167		37.1452	37.3692	37.4358
153	2017-09-15	04:00:00	77	37.1		80.9318	37.3692	83.1667		37.1429	37.3692	37.4175
154	2017-09-15	04:30:00	97	36.87		81.4091	37.355	37.3608		37.1313	37.355	37.3608
155	2017-09-15	05:00:00	78	36.76		81.1818	37.3408	37.305		37.1148	37.3408	37.305
156	2017-09-15	05:30:00	20	36.65		80.6591	84.8261	73.25		37.1008	37.3129	37.24
157	2017-09-15	06:00:00	93	36.54		81.4773	84.3478	73.6667		37.0846	37.2758	37.1658
158	2017-09-15	06:30:00	73	36.65		81.4773	83.1304	72.5833		37.08	37.2433	37.1008
159	2017-09-15	07:00:00		36.54		81.8837	37.2108	72.4545		37.0783	37.2108	37.0167
160	2017-09-15	07:30:00	53	36.87		81.0698	37.1875	36.9508		37.0852	37.1875	36.9508
161	2017-09-15	08:00:00	49	36.9		79.7907	37.1792	36.8967		37.0923	37.1792	36.8967
162	2017-09-15	08:30:00	59	36.76		79.814	78.1818	65.1818		37.0969	37.1604	36.8383
163	2017-09-15	09:00:00	42	36.54		78.9545	76.6087	63.6364		37.0969	37.1183	36.7733
164	2017-09-15	09:30:00	41	36.65		78.1111	74.2174	62		37.0992	37.0858	36.7358
165	2017-09-15	10:00:00	53	36.54		77.3111	37.0533	59.8182		37.0992	37.0533	36.6892
166	2017-09-15	10:30:00		36.54		77.3111	37.0112	36.6617		37.0992	37.0112	36.6617
167	2017-09-15	11:00:00	14	36.65		76.8667	36.9787	36.6525		37.094	36.9787	36.6525
168	2017-09-15	11:30:00	91	36.65		77	65.7727	56.8		37.0894	36.9462	36.6525
169	2017-09-15	12:00:00		36.87		78.2727	64.7143	52.7778		37.094	36.9229	36.68
170	2017-09-15	12:30:00	42	35.98		76.7045	62.619	49.3333		37.0777	36.8625	36.6242
171	2017-09-15	13:00:00	101	35.98		76.2955	36.7971	54.5		37.0615	36.7971	36.5775
172	2017-09-15	13:30:00	105	36.87		77.2955	36.7642	36.5775		37.0637	36.7642	36.5775
173	2017-09-15	14:00:00	56	36.76		75.8409	36.7312	36.5658		37.0521	36.7312	36.5658
174	2017-09-15	14:30:00		36.54		76.8372	63.1	60.5556		37.031	36.6929	36.5475
175	2017-09-15	15:00:00	93	36.54		77.2558	64.8	66.2222		37.0148	36.6604	36.5475
176	2017-09-15	15:30:00	48	36.76		76.2326	64.25	67		37.0077	36.6462	36.5567
177	2017-09-15	16:00:00	67	36.87		75.1163	36.6367	68.5556		37.0029	36.6367	36.5842
178	2017-09-15	16:30:00	92	37.43		76.1395	36.66	36.6583		37.0075	36.66	36.6583
179	2017-09-15	17:00:00	104	37.55		77.4651	36.6929	36.7333		37.0169	36.6929	36.7333
180	2017-09-15	17:30:00	129	37.32		78.0465	70.25	83.7		37.0169	36.7208	36.7892
181	2017-09-15	18:00:00	94	37.21		77.814	70.3	84.6364		37.0123	36.7487	36.8175
182	2017-09-15	18:30:00	86	37.66		77.4651	70.95	88.6364		37.0171	36.7908	36.9575
183	2017-09-15	19:00:00	82	37.55		77.5814	36.8329	86.9091		37.0219	36.8329	37.0883
184	2017-09-15	19:30:00	77	37.1		77.2558	36.8425	37.1075		37.015	36.8425	37.1075
185	2017-09-15	20:00:00	73	37.21		76.8372	36.8554	37.145		37.0173	36.8554	37.145
186	2017-09-15	20:30:00	83	37.43		76.5814	74.9048	85.6667		37.0219	36.8833	37.2192
187	2017-09-15	21:00:00	87	37.43		76.8182	77.0476	85.1667		37.0194	36.9204	37.2933
188	2017-09-15	21:30:00	87	37.21		76.6136	79.2381	88.4167		37.0148	36.9438	37.3308
189	2017-09-15	22:00:00	56	37.24		75.5227	36.9729	87.5		37.0131	36.9729	37.3617
190	2017-09-15	22:30:00	90	37.43		75.3864	37.01	37.3617		37.0106	37.01	37.3617
191	2017-09-15	23:00:00	92	36.87		74.6364	37.0192	37.305		36.999	37.0192	37.305
192	2017-09-15	23:30:00	70	37.32		74.1136	82.4545	81.4167		36.9967	37.0471	37.305
193	2017-09-16	00:00:00	80	37.32		73.9318	82.3478	80.25		36.9944	37.0658	37.3142
194	2017-09-16	00:30:00	88	37.1		73.9773	84.3478	80.4167		36.9875	37.1125	37.2675
195	2017-09-16	01:00:00	54	37.1		73.5227	37.1592	78.0833		36.9781	37.1592	37.23
196	2017-09-16	01:30:00	86	37.1		73.7045	37.1688	37.23		36.9665	37.1688	37.23
197	2017-09-16	02:00:00	84	37.1		74.1364	37.1829	37.2208		36.9571	37.1829	37.2208
198	2017-09-16	02:30:00	54	37.1		73.1364	81.5	77.3333		36.9496	37.2063	37.1933
199	2017-09-16	03:00:00	51	37.1		72.9545	79.75	74.3333		36.945	37.2296	37.1658
200	2017-09-16	03:30:00	65	36.98		73.0909	80.4583	72.5		36.9425	37.2388	37.1467
201	2017-09-16	04:00:00	76	37.1		73.0682	37.2483	74.1667		36.9425	37.2483	37.135
202	2017-09-16	04:30:00	73	36.98		72.5227	37.2296	37.0975		36.9448	37.2296	37.0975
203	2017-09-16	05:00:00	75	36.51		72.4545	37.1863	37.0675		36.9396	37.1863	37.0675
204	2017-09-16	05:30:00	61	36.23		73.3864	76	70.5833		36.9308	37.1408	36.9767
205	2017-09-16	06:00:00	48	36.31		72.3636	74.0833	67.9167		36.926	37.1033	36.8925
206	2017-09-16	06:30:00	163	36.43		74.4091	77.2917	74.1667		36.9215	37.0521	36.8367
207	2017-09-16	07:00:00	84	36.56		74.6222	37.0108	76.6667		36.9219	37.0108	36.7917
208	2017-09-16	07:30:00	187	36.65		77.6	36.9921	36.7542		36.9173	36.9921	36.7542
209	2017-09-16	08:00:00		36.76		78.25	36.9733	36.7258		36.9144	36.9733	36.7258
210	2017-09-16	08:30:00	54	36.87		78.1364	81.087	85.1818		36.9167	36.95	36.7067
211	2017-09-16	09:00:00	56	36.54		78.4545	79.7391	85.6364		36.9167	36.9129	36.66
212	2017-09-16	09:30:00	70	36.98		79.1136	79	86.0909		36.9235	36.9033	36.66
213	2017-09-16	10:00:00	49	36.65		79.0227	36.8788	83.6364		36.9258	36.8788	36.6225
214	2017-09-16	10:30:00	28	36.87		77.8889	36.8554	36.6133		36.9327	36.8554	36.6133
215	2017-09-16	11:00:00	192	36.45		81.8444	36.8379	36.6083		36.9285	36.8379	36.6083
216	2017-09-16	11:30:00	138	34.77		82.8889	83.3043	97.1818		36.8894	36.7317	36.4867
217	2017-09-16	12:00:00	91	37.1		83.0652	83.7826	101.091		36.8942	36.7225	36.5525
218	2017-09-16	12:30:00	80	37.1		83.8913	83.4348	93.5455		36.9175	36.7225	36.6083
219	2017-09-16	13:00:00	78	37.1		83.3913	36.7225	93		36.9408	36.7225	36.6533
220	2017-09-16	13:30:00	115	36.76		83.6087	36.7083	36.6625		36.9385	36.7083	36.6625
221	2017-09-16	14:00:00	94	37.21		84.4348	36.7129	36.7		36.9479	36.7129	36.7
222	2017-09-16	14:30:00	86	37.43		84.4681	87.5652	89.75		36.9665	36.7267	36.7467
223	2017-09-16	15:00:00	82	37.43		84.234	88.913	91.9167		36.985	36.7404	36.8208
224	2017-09-16	15:30:00	111	37.43		85.5745	90.913	95.3333		36.999	36.7592	36.8583
225	2017-09-16	16:00:00	59	37.86		85.4043	36.7908	96.1667		37.0196	36.7908	36.9592
226	2017-09-16	16:30:00	102	37.66		85.617	36.8192	37.025		37.0244	36.8192	37.025
227	2017-09-16	17:00:00	102	37.83		85.5745	36.8742	37.14		37.0302	36.8742	37.14
228	2017-09-16	17:30:00	105	37.89		85.0638	94.5217	92.0833		37.0421	36.9433	37.4
229	2017-09-16	18:00:00	85	38.11		84.8723	96.1304	91.5833		37.0608	37.0183	37.4842
230	2017-09-16	18:30:00	77	37.77		84.6809	92.3913	91.3333		37.0631	37.0742	37.54
231	2017-09-16	19:00:00	91	37.66		84.8723	37.12	92.4167		37.0654	37.12	37.5867
232	2017-09-16	19:30:00	86	37.55		85.0638	37.1575	37.6525		37.0748	37.1575	37.6525
233	2017-09-16	20:00:00	91	37.43		85.4468	37.1854	37.6708		37.0794	37.1854	37.6708
234	2017-09-16	20:30:00	59	37.43		84.9362	88.625	87.5		37.0794	37.2087	37.6708
235	2017-09-16	21:00:00	85	37.21		84.8936	89.8333	87.75		37.0748	37.2367	37.6525
236	2017-09-16	21:30:00	92	37.21		85	90.75	86.1667		37.0748	37.2462	37.6342
237	2017-09-16	22:00:00	82	37.32		85.5532	37.2742	88.0833		37.0765	37.2742	37.5892
238	2017-09-16	22:30:00	94	37.32		85.6383	37.2929	37.5608		37.0742	37.2929	37.5608
239	2017-09-16	23:00:00	90	37.43		85.5957	37.3337	37.5275		37.0858	37.3337	37.5275
240	2017-09-16	23:30:00	100	37.49		86.234	89.0417	86		37.0894	37.4471	37.4942
241	2017-09-17	00:00:00	85	37.55		86.3404	88.7917	86		37.0942	37.4658	37.4475
242	2017-09-17	00:30:00	69	37.6		85.9362	88.3333	85.3333		37.1046	37.4867	37.4333
243	2017-09-17	01:00:00	98	37.66		86.8723	37.51	85.9167		37.1163	37.51	37.4333
244	2017-09-17	01:30:00	111	37.55		87.4043	37.5429	37.4333		37.1256	37.5429	37.4333
245	2017-09-17	02:00:00	80	37.32		87.3191	37.5475	37.4242		37.1302	37.5475	37.4242
246	2017-09-17	02:30:00	77	37.1		87.8085	88.0417	88.5833		37.1302	37.5338	37.3967
247	2017-09-17	03:00:00	75	36.98		88.3191	87.75	87.75		37.1277	37.515	37.3775
248	2017-09-17	03:30:00	83	36.87		88.7021	86.5833	87		37.1254	37.4917	37.3492
249	2017-09-17	04:00:00	57	36.98		88.2979	37.455	84.9167		37.1229	37.455	37.3208
250	2017-09-17	04:30:00	50	36.87		87.8085	37.4221	37.2833		37.1206	37.4221	37.2833
251	2017-09-17	05:00:00	46	36.76		87.1915	37.3775	37.2275		37.1258	37.3775	37.2275
252	2017-09-17	05:30:00	52	36.31		87	79.7917	73.5833		37.1275	37.3117	37.1292
253	2017-09-17	06:00:00	113	36.65		88.383	80.9583	75.9167		37.1346	37.2508	37.0542
254	2017-09-17	06:30:00	69	36.87		86.383	80.625	75.9167		37.1437	37.2133	36.9933
255	2017-09-17	07:00:00	47	36.76		85.5957	37.1758	71.6667		37.1479	37.1758	36.9183
256	2017-09-17	07:30:00	56	36.65		82.8085	37.1383	36.8433		37.1479	37.1383	36.8433
257	2017-09-17	08:00:00	92	36.31		83	37.0917	36.7592		37.1385	37.0917	36.7592
258	2017-09-17	08:30:00		36.62		83.617	78.3913	67.2727		37.1333	37.0579	36.7192
259	2017-09-17	09:00:00	50	36.87		83.4894	76.8696	65		37.1402	37.0438	36.71
260	2017-09-17	09:30:00	78	36.68		83.6596	76.2609	64.5455		37.134	37.0217	36.6942
261	2017-09-17	10:00:00		36.43		84.413	36.9846	65.3		37.1294	36.9846	36.6483
262	2017-09-17	10:30:00	66	36.98		85.2391	36.9704	36.6575		37.1317	36.9704	36.6575
263	2017-09-17	11:00:00	44	37.1		82.0217	36.9567	36.6858		37.1452	36.9567	36.6858
264	2017-09-17	11:30:00	64	37.21		80.413	71	67.9		37.196	36.945	36.7608
265	2017-09-17	12:00:00	80	37.21		80.1739	70.7727	64.6		37.1983	36.9308	36.8075
266	2017-09-17	12:30:00	77	37.32		80.1087	71.1364	65.4		37.2029	36.9192	36.845
267	2017-09-17	13:00:00	30	36.65		79.0652	36.8771	63.7		37.1935	36.8771	36.8358
268	2017-09-17	13:30:00	101	36.76		78.7609	36.8442	36.845		37.1935	36.8442	36.845
269	2017-09-17	14:00:00	150	35.65		79.9783	36.7746	36.79		37.161	36.7746	36.79
270	2017-09-17	14:30:00	71	36.2		79.6522	70.5	73.7273		37.1354	36.7371	36.755
271	2017-09-17	15:00:00		36.98		79.6	70.2857	76.1		37.126	36.7371	36.7642
272	2017-09-17	15:30:00	85	35.76		79.0222	70.381	76.8		37.0913	36.6908	36.6875
273	2017-09-17	16:00:00		36.31		79.4773	36.6629	76.8		37.059	36.6629	36.6775
274	2017-09-17	16:30:00		37.01		78.9535	36.6688	36.68		37.0454	36.6688	36.68
275	2017-09-17	17:00:00	91	37.43		78.6977	36.6967	36.7075		37.0371	36.6967	36.7075
276	2017-09-17	17:30:00		37.43		78.0714	75.7778	85.625		37.0275	36.7433	36.7258
277	2017-09-17	18:00:00	98	37.32		78.381	74.9444	87.875		37.011	36.7712	36.735
278	2017-09-17	18:30:00	90	37.43		78.6905	76.1111	89.5		37.004	36.7946	36.7442
279	2017-09-17	19:00:00	113	37.21		79.2143	36.8133	99.875		36.9946	36.8133	36.7908
280	2017-09-17	19:30:00	73	37.1		78.9048	36.8321	36.8192		36.9852	36.8321	36.8192
281	2017-09-17	20:00:00	89	36.87		78.8571	36.8554	36.9208		36.9735	36.8554	36.9208
282	2017-09-17	20:30:00	94	36.87		79.6905	81.2632	91.625		36.9619	36.8658	36.9767
283	2017-09-17	21:00:00	119	36.98		80.5	84.8947	94.6667		36.9571	36.8704	36.9767
284	2017-09-17	21:30:00	93	37.1		80.5238	85.6842	95.5556		36.9548	36.8879	37.0883
285	2017-09-17	22:00:00	107	37.1		81.119	36.9158	96.7		36.9502	36.9158	37.1542
286	2017-09-17	22:30:00	89	36.98		81	36.9158	37.1517		36.9431	36.9158	37.1517
287	2017-09-17	23:00:00	87	36.96		80.9286	36.91	37.1125		36.9333	36.91	37.1125
288	2017-09-17	23:30:00	98	37.1		80.881	91.75	95.8333		36.9252	36.9054	37.085
289	2017-09-18	00:00:00	98	36.87		81.1905	92.65	95.8333		36.911	36.8913	37.0475
290	2017-09-18	00:30:00		36.76		81.4878	93.4737	96.3636		36.8935	36.8679	36.9917
291	2017-09-18	01:00:00	93	36.87		81.3659	36.8771	94.5455		36.8771	36.8771	36.9633
292	2017-09-18	01:30:00	101	36.87		81.122	36.8817	36.9442		36.8629	36.8817	36.9442
293	2017-09-18	02:00:00	30	36.43		79.9024	36.9142	36.9075		36.8444	36.9142	36.9075
294	2017-09-18	02:30:00	84	36.76		80.0732	91.1579	90.8182		36.8373	36.9375	36.8983
295	2017-09-18	03:00:00	87	36.87		80.3659	90.95	87.9091		36.835	36.9329	36.8892
296	2017-09-18	03:30:00	63	36.87		79.878	89.85	85.1818		36.835	36.9792	36.87
297	2017-09-18	04:00:00	60	36.87		79.9512	37.0025	80.9091		36.8327	37.0025	36.8508
298	2017-09-18	04:30:00	61	36.87		80.2195	36.9967	36.8417		36.8327	36.9967	36.8417
299	2017-09-18	05:00:00	54	36.87		80.4146	36.9733	36.8342		36.835	36.9733	36.8342
300	2017-09-18	05:30:00	96	36.76		81.4878	85.9565	75.1818		36.8444	36.9454	36.8058
301	2017-09-18	06:00:00	100	36.76		81.1707	86.0435	75.3636		36.8467	36.9221	36.7967
302	2017-09-18	06:30:00	44	36.65		80.561	84.0435	72.75		36.8421	36.8896	36.7875
303	2017-09-18	07:00:00	64	36.76		80.9756	36.8708	70.3333		36.8421	36.8708	36.7783
304	2017-09-18	07:30:00	133	36.76		82.8537	36.8567	36.7692		36.8444	36.8567	36.7692
305	2017-09-18	08:00:00	75	36.54		82.439	36.8429	36.7783		36.8492	36.8429	36.7783
306	2017-09-18	08:30:00	36	36.31		81.3333	81.3913	72.75		36.8427	36.8196	36.7408
307	2017-09-18	09:00:00	55	36.31		81.4524	78.6087	70.0833		36.831	36.7917	36.6942
308	2017-09-18	09:30:00	113	36.2		82.2857	79.4783	74.25		36.821	36.7542	36.6383
309	2017-09-18	10:00:00	39	35.76		81.2791	36.6983	72.5		36.8071	36.6983	36.5458
310	2017-09-18	10:30:00	72	36.56		81.4186	36.6808	36.52		36.7983	36.6808	36.52
311	2017-09-18	11:00:00	49	36.65		81.5349	36.6679	36.5017		36.789	36.6679	36.5017
312	2017-09-18	11:30:00	54	36.2		81.3023	72.2174	69.5		36.7679	36.6304	36.455
313	2017-09-18	12:00:00	27	36.09		80.0698	69.1304	63.4167		36.7446	36.5979	36.3992
314	2017-09-18	12:30:00	83	36.43		80.2093	69.7083	66.6667		36.726	36.5842	36.3808
315	2017-09-18	13:00:00	156	36.65		83.1395	36.575	74.3333		36.726	36.575	36.3717
316	2017-09-18	13:30:00	64	36.76		82.2791	36.5704	36.3717		36.726	36.5704	36.3717
317	2017-09-18	14:00:00	100	36.65		81.1163	36.5796	36.3808		36.7469	36.5796	36.3808
318	2017-09-18	14:30:00	46	36.31		80.5349	72.125	71.5		36.7492	36.5608	36.3808
319	2017-09-18	15:00:00	88	36.43		80.7045	72.1667	74.25		36.7377	36.5425	36.3908
320	2017-09-18	15:30:00	61	37.1		80.1591	72.0833	69.9167		36.7656	36.5521	36.4658
321	2017-09-18	16:00:00	68	36.76		79.8889	36.5475	72.3333		36.775	36.5475	36.5492
322	2017-09-18	16:30:00	93	37.21		80.1739	36.5617	36.6033		36.7792	36.5617	36.6033
323	2017-09-18	17:00:00	90	37.21		80.1522	36.5758	36.65		36.7746	36.5758	36.65
324	2017-09-18	17:30:00	107	37.21		80.7234	75.7083	81.9167		36.77	36.5946	36.7342
325	2017-09-18	18:00:00	26	37.43		79.1915	72.625	81.8333		36.7723	36.6225	36.8458
326	2017-09-18	18:30:00	91	37.43		79.2128	74.5833	82.5		36.7723	36.655	36.9292
327	2017-09-18	19:00:00	87	37.49		78.6596	36.6854	76.75		36.7781	36.6854	36.9992
328	2017-09-18	19:30:00	91	37.1		79.0426	36.6996	37.0275		36.7781	36.6996	37.0275
329	2017-09-18	20:00:00	92	37.21		79.1064	36.7275	37.0742		36.7852	36.7275	37.0742
330	2017-09-18	20:30:00	96	37.1		79.1489	77	82.5		36.79	36.7604	37.14
331	2017-09-18	21:00:00	96	37.1		78.6596	78.7083	83.1667		36.7925	36.7933	37.1958
332	2017-09-18	21:30:00	92	36.87		78.6383	77.8333	85.75		36.7877	36.8212	37.1767
333	2017-09-18	22:00:00	79	36.65		78.0426	36.8583	86.6667		36.7783	36.8583	37.1675
334	2017-09-18	22:30:00	93	36.76		78.1277	36.8667	37.13		36.7737	36.8667	37.13
335	2017-09-18	23:00:00	89	36.98		78.1702	36.8804	37.1108		36.7742	36.8804	37.1108
336	2017-09-18	23:30:00	92	36.98		78.0426	83.625	85.3333		36.7717	36.9129	37.0917
337	2017-09-19	00:00:00	90	37.1		77.8723	86.25	90.6667		36.7765	36.955	37.0642
338	2017-09-19	00:30:00	90	36.98		78.125	86.5417	90.5833		36.781	36.9779	37.0267
339	2017-09-19	01:00:00	88	36.98		78.0208	36.9917	90.6667		36.7833	36.9917	36.9842
340	2017-09-19	01:30:00	81	36.98		77.6042	37.0008	36.9742		36.7856	37.0008	36.9742
341	2017-09-19	02:00:00	96	36.98		78.9792	37.0146	36.955		36.7971	37.0146	36.955
342	2017-09-19	02:30:00	75	36.98		78.7917	85.4583	88.4167		36.8017	37.0425	36.945
343	2017-09-19	03:00:00	85	36.98		78.75	85.3333	87.5		36.804	37.0654	36.935
344	2017-09-19	03:30:00	86	36.98		79.2292	86.375	87		36.8062	37.0604	36.9442
345	2017-09-19	04:00:00	87	36.98		79.7917	37.0696	87.6667		36.8085	37.0696	36.9717
346	2017-09-19	04:30:00	136	36.87		81.3542	37.0554	36.9808		36.8085	37.0554	36.9808
347	2017-09-19	05:00:00	120	36.2		82.7292	37.0133	36.9158		36.7946	37.0133	36.9158
348	2017-09-19	05:30:00		36.48		82.4468	89.4783	94		36.7887	36.9829	36.8742
349	2017-09-19	06:00:00	68	36.79		81.766	91.3043	92		36.7894	36.9563	36.8483
350	2017-09-19	06:30:00	73	36.87		82.383	90.5217	90.4545		36.794	36.9329	36.8392
351	2017-09-19	07:00:00	84	36.65		82.8085	36.8979	90.0909		36.7917	36.8979	36.8117
352	2017-09-19	07:30:00	47	36.43		80.9787	36.87	36.7658		36.7848	36.87	36.7658
353	2017-09-19	08:00:00	156	35.98		82.7021	36.8188	36.6825		36.7731	36.8188	36.6825
354	2017-09-19	08:30:00	52	36.2		83.0426	89.3478	90.3636		36.7708	36.7813	36.6175
355	2017-09-19	09:00:00	64	36.2		83.234	87.9565	88.4545		36.7685	36.7438	36.5525
356	2017-09-19	09:30:00	58	36.65		82.0638	86.4783	85.9091		36.7779	36.7346	36.525
357	2017-09-19	10:00:00		36.76		83	36.7392	85.8		36.7988	36.7392	36.5067
358	2017-09-19	10:30:00	78	36.43		83.1304	36.7254	36.47		36.796	36.7254	36.47
359	2017-09-19	11:00:00	79	36.31		83.7826	36.6975	36.4792		36.789	36.6975	36.4792
360	2017-09-19	11:30:00	83	36.54		84.413	85.2727	76.5455		36.796	36.6792	36.4842
361	2017-09-19	12:00:00	52	35.65		84.9565	83.5455	75.0909		36.7869	36.6187	36.3892
362	2017-09-19	12:30:00	68	36.76		84.6304	82.5455	74.6364		36.7938	36.6096	36.38
363	2017-09-19	13:00:00	70	37.1		82.7609	36.6146	73.3636		36.8031	36.6146	36.4175
364	2017-09-19	13:30:00	59	37.21		82.6522	36.6242	36.4825		36.8125	36.6242	36.4825
365	2017-09-19	14:00:00	64	36.87		81.8696	36.6196	36.5567		36.8171	36.6196	36.5567
366	2017-09-19	14:30:00	54	36.65		82.0435	78.3182	66.2727		36.8242	36.6058	36.5942
367	2017-09-19	15:00:00	59	35.54		81.413	77.1364	65.8182		36.8056	36.5458	36.5392
368	2017-09-19	15:30:00	67	36.31		81.5435	76.2727	66.6364		36.7892	36.5179	36.5108
369	2017-09-19	16:00:00	122	36.87		82.7174	36.5133	71.25		36.7915	36.5133	36.52
370	2017-09-19	16:30:00	105	37.32		82.9783	36.5321	36.5942		36.7938	36.5321	36.5942
371	2017-09-19	17:00:00	93	37.66		83.0435	36.5929	36.7067		36.8031	36.5929	36.7067
372	2017-09-19	17:30:00	115	37.77		83.2174	76.9565	77.3333		36.8148	36.6467	36.8092
373	2017-09-19	18:00:00	113	37.43		85.1087	78.913	82.4167		36.8148	36.6733	36.9575
374	2017-09-19	18:30:00	90	37.55		85.087	79.6522	84.25		36.8173	36.7017	37.0233
375	2017-09-19	19:00:00	90	37.43		85.1522	36.7342	85.9167		36.816	36.7342	37.0508
376	2017-09-19	19:30:00	90	37.1		85.1304	36.7621	37.0417		36.816	36.7621	37.0417
377	2017-09-19	20:00:00	87	37.1		85.0217	36.8087	37.0608		36.8137	36.8087	37.0608
378	2017-09-19	20:30:00	85	37.21		84.7826	80.2174	93		36.816	36.8508	37.1075
379	2017-09-19	21:00:00	84	36.87		84.5217	81.087	95.0833		36.8112	36.8787	37.2183
380	2017-09-19	21:30:00	65	36.87		83.9348	81.3913	94.9167		36.8112	36.8879	37.265
381	2017-09-19	22:00:00	75	36.87		83.8478	36.8925	91		36.8158	36.8925	37.265
382	2017-09-19	22:30:00	82	37.21		83.6087	36.925	37.2558		36.8252	36.925	37.2558
383	2017-09-19	23:00:00	80	37.21		83.413	36.9625	37.2183		36.83	36.9625	37.2183
384	2017-09-19	23:30:00	78	37.21		83.1087	81.125	84.9167		36.8348	36.9904	37.1717
385	2017-09-20	00:00:00	22	36.98		81.6304	79.875	77.3333		36.8323	37.0458	37.1342
386	2017-09-20	00:30:00	72	37.01		81.2391	80.0417	75.8333		36.8329	37.0563	37.0892
387	2017-09-20	01:00:00	80	37.1		81.0652	37.0563	75		36.8354	37.0563	37.0617
388	2017-09-20	01:30:00	84	36.76		81.1304	37.0375	37.0333		36.8308	37.0375	37.0333
389	2017-09-20	02:00:00	64	36.98		80.4348	37.0421	37.0233		36.8308	37.0421	37.0233
390	2017-09-20	02:30:00	86	36.98		80.6739	82.8333	72.6667		36.8308	37.0558	37.0042
391	2017-09-20	03:00:00	61	36.98		80.1522	82.9167	70.75		36.8308	37.1158	37.0133
392	2017-09-20	03:30:00	75	36.87		79.913	83.25	71.5833		36.8285	37.1392	37.0133
393	2017-09-20	04:00:00	84	36.87		79.8478	37.1392	72.3333		36.8262	37.1392	37.0133
394	2017-09-20	04:30:00	64	36.87		78.2826	37.1204	36.985		36.8262	37.1204	36.985
395	2017-09-20	05:00:00	55	36.87		76.8696	37.0875	36.9567		36.8402	37.0875	36.9567
396	2017-09-20	05:30:00	44	36.54		76.1702	75.4167	65.9167		36.8415	37.0363	36.9008
397	2017-09-20	06:00:00	34	36.76		75.4468	72.125	66.9167		36.8408	37.0083	36.8825
398	2017-09-20	06:30:00	63	36.65		75.234	71	66.1667		36.8362	36.9708	36.8525
399	2017-09-20	07:00:00	66	36.98		74.8511	36.9521	65		36.8431	36.9521	36.8425
400	2017-09-20	07:30:00	58	36.98		75.0851	36.9471	36.8608		36.8546	36.9471	36.8608
401	2017-09-20	08:00:00	54	36.87		72.9149	36.9375	36.8517		36.8731	36.9375	36.8517
402	2017-09-20	08:30:00	62	37.1		73.1277	66.3333	60		36.8919	36.9329	36.8617
403	2017-09-20	09:00:00	61	36.87		73.0638	65.375	60		36.9058	36.9329	36.8525
404	2017-09-20	09:30:00	60	36.76		73.1064	65.1667	58.75		36.9081	36.9283	36.8433
405	2017-09-20	10:00:00	47	36.76		72.5625	36.9237	55.6667		36.9081	36.9237	36.8342
406	2017-09-20	10:30:00	59	36.76		72.1667	36.905	36.825		36.915	36.905	36.825
407	2017-09-20	11:00:00	83	34.55		72.25	36.7942	36.6317		36.8783	36.7942	36.6317
408	2017-09-20	11:30:00	92	35.98		72.4375	63.75	61.5833		36.8667	36.7429	36.585
409	2017-09-20	12:00:00	48	36.76		72.3542	64.8333	62.75		36.8898	36.7337	36.585
410	2017-09-20	12:30:00	48	35.98		71.9375	63.8333	61.5		36.8735	36.6908	36.5292
411	2017-09-20	13:00:00	67	36.76		71.875	36.6767	61.5833		36.8665	36.6767	36.5108
412	2017-09-20	13:30:00	131	35.98		73.375	36.6442	36.4275		36.8408	36.6442	36.4275
413	2017-09-20	14:00:00	65	36.65		73.3958	36.6304	36.4092		36.8362	36.6304	36.4092
414	2017-09-20	14:30:00	56	36.79		73.4375	64.0417	68.0833		36.8392	36.6225	36.3833
415	2017-09-20	15:00:00	87	36.65		74.0208	65.125	70.25		36.8623	36.6087	36.365
416	2017-09-20	15:30:00	68	36.65		74.0417	64.8333	70.9167		36.8694	36.5996	36.3558
417	2017-09-20	16:00:00	60	36.65		72.75	36.5904	72		36.8648	36.5904	36.3467
418	2017-09-20	16:30:00	80	37.66		72.2292	36.6233	36.4217		36.8719	36.6233	36.4217
419	2017-09-20	17:00:00	100	37.66		72.375	36.6562	36.6808		36.8719	36.6562	36.6808
420	2017-09-20	17:30:00	122	37.55		72.5208	69.625	77.6667		36.8673	36.6983	36.8117
421	2017-09-20	18:00:00		37.63		71.6596	71.1739	80.3636		36.8715	36.7346	36.8842
422	2017-09-20	18:30:00	100	37.55		71.8723	72.7826	85.0909		36.8715	36.7721	37.015
423	2017-09-20	19:00:00	87	36.98		71.8085	36.7721	86.9091		36.8621	36.7721	37.0333
424	2017-09-20	19:30:00	83	37.32		71.6596	36.7862	37.145		36.8667	36.7862	37.145
425	2017-09-20	20:00:00	93	37.32		71.7872	36.805	37.2008		36.8713	36.805	37.2008
426	2017-09-20	20:30:00	78	37.1		71.6383	77.1739	87.0909		36.869	36.805	37.2267
427	2017-09-20	21:00:00	94	36.98		71.8511	78.6087	87.7273		36.8713	36.8096	37.2542
428	2017-09-20	21:30:00	102	37.15		72.6383	80.4348	90.8182		36.8771	36.8258	37.2958
429	2017-09-20	22:00:00	84	37.01		72.8298	36.8362	93		36.88	36.8362	37.3258
430	2017-09-20	22:30:00	75	36.98		72.6809	36.8454	37.2692		36.8752	36.8454	37.2692
431	2017-09-20	23:00:00	87	37.1		72.8298	36.9517	37.2225		36.8729	36.9517	37.2225
432	2017-09-20	23:30:00	80	36.76		72.8723	82.3913	87.5455		36.8635	36.9842	37.1567
433	2017-09-21	00:00:00	83	36.76		74.1702	83.913	87.1667		36.859	36.9842	37.0842
434	2017-09-21	00:30:00	78	36.76		74.2979	85.2174	85.3333		36.8538	37.0167	37.0183
435	2017-09-21	01:00:00	68	36.54		74.0426	37.0075	83.75		36.8421	37.0075	36.9817
436	2017-09-21	01:30:00	87	36.65		74.1064	37.0354	36.9258		36.8398	37.0354	36.9258
437	2017-09-21	02:00:00	88	36.65		74.617	37.0354	36.87		36.8329	37.0354	36.87
438	2017-09-21	02:30:00	84	36.65		74.5745	85.5652	84.1667		36.826	37.0296	36.8325
439	2017-09-21	03:00:00	76	36.84		74.8936	85.087	82.6667		36.8231	37.0375	36.8208
440	2017-09-21	03:30:00	81	36.87		75.0213	85.6522	80.9167		36.8231	37.0467	36.7975
441	2017-09-21	04:00:00	75	36.87		74.8298	37.0558	80.1667		36.8231	37.0558	36.7858
442	2017-09-21	04:30:00	78	36.87		75.1277	37.0229	36.7767		36.8231	37.0229	36.7767
443	2017-09-21	05:00:00	66	36.87		75.3617	36.99	36.7575		36.8231	36.99	36.7575
444	2017-09-21	05:30:00	61	36.76		75.7234	82.087	77.0833		36.8277	36.9571	36.7575
445	2017-09-21	06:00:00	101	36.54		77.1489	82.875	78.5833		36.8231	36.9117	36.7392
446	2017-09-21	06:30:00	68	36.54		77.2553	81.5417	77.75		36.8208	36.8696	36.7208
447	2017-09-21	07:00:00	87	36.65		77.7021	36.8558	79.3333		36.814	36.8558	36.73
448	2017-09-21	07:30:00	101	37.21		78.617	36.8513	36.7767		36.8187	36.8513	36.7767
449	2017-09-21	08:00:00	69	37.1		78.9362	36.8421	36.8142		36.8235	36.8421	36.8142
450	2017-09-21	08:30:00	78	36.98		79.2766	81.2917	78.4167		36.821	36.8371	36.8417
451	2017-09-21	09:00:00	65	37.21		79.3617	80.0833	77.5		36.8281	36.8467	36.8725
452	2017-09-21	09:30:00	66	35.65		79.4894	78.5833	76.25		36.805	36.7842	36.7708
453	2017-09-21	10:00:00	24	36.09		79	36.7458	72		36.791	36.7458	36.7058
454	2017-09-21	10:30:00	72	36.65		79.2766	36.7321	36.6875		36.7888	36.7321	36.6875
455	2017-09-21	11:00:00	82	36.65		79.2553	36.7133	36.6692		36.8325	36.7133	36.6692
456	2017-09-21	11:30:00	91	36.76		79.234	76.2083	75.3333		36.8488	36.7133	36.6692
457	2017-09-21	12:00:00	105	36.2		80.4468	77.125	75.6667		36.8371	36.69	36.6408
458	2017-09-21	12:30:00	39	35.87		80.2553	75.5	73.25		36.8348	36.6529	36.585
459	2017-09-21	13:00:00	58	37.21		80.0638	36.6808	70.8333		36.8442	36.6808	36.6317
460	2017-09-21	13:30:00	67	36.98		78.7021	36.6946	36.6125		36.865	36.6946	36.6125
461	2017-09-21	14:00:00	76	36.31		78.9362	36.6804	36.5467		36.8579	36.6804	36.5467
462	2017-09-21	14:30:00	97	36.65		79.8085	74.2917	70.1667		36.855	36.6804	36.5192
463	2017-09-21	15:00:00	147	36.87		81.0851	77.25	77		36.8596	36.6817	36.4908
464	2017-09-21	15:30:00	101	34.88		81.7872	78.0833	79.9167		36.8227	36.5988	36.4267
465	2017-09-21	16:00:00	92	36.76		82.4681	36.5942	85.5833		36.825	36.5942	36.4825
466	2017-09-21	16:30:00	96	37.43		82.8085	36.6175	36.5475		36.8202	36.6175	36.5475
467	2017-09-21	17:00:00	97	37.57		82.7447	36.6467	36.6242		36.8183	36.6467	36.6242
468	2017-09-21	17:30:00	100	37.55		82.2766	82.4583	89.5833		36.8183	36.6796	36.69
469	2017-09-21	18:00:00	66	37.49		81.9375	81	86.3333		36.8154	36.7192	36.7975
470	2017-09-21	18:30:00	78	37.43		81.4792	81.4167	89.5833		36.8129	36.7562	36.9275
471	2017-09-21	19:00:00	80	37.43		81.3333	36.7887	91.4167		36.8223	36.7887	36.9458
472	2017-09-21	19:30:00	82	37.32		81.3125	36.7933	36.9742		36.8223	36.7933	36.9742
473	2017-09-21	20:00:00	78	37.21		81	36.7979	37.0492		36.82	36.7979	37.0492
474	2017-09-21	20:30:00	82	36.87		81.0833	80.875	91.5833		36.8152	36.7933	37.0675
475	2017-09-21	21:00:00	83	36.87		80.8542	81.625	86.25		36.8129	36.7792	37.0675
476	2017-09-21	21:30:00	75	36.98		80.2917	82	84.0833		36.8094	36.8346	37.2425
477	2017-09-21	22:00:00	87	36.98		80.3542	36.8717	83.6667		36.8087	36.8717	37.2608
478	2017-09-21	22:30:00	72	36.98		80.2917	36.8854	37.2233		36.8087	36.8854	37.2233
479	2017-09-21	23:00:00	68	36.98		79.8958	36.8992	37.1742		36.8062	36.8992	37.1742
480	2017-09-21	23:30:00	90	36.87		80.1042	84	78.4167		36.8085	36.9038	37.1175
481	2017-09-22	00:00:00	68	36.87		79.7917	82.4583	78.5833		36.8108	36.9317	37.0658
482	2017-09-22	00:30:00	81	36.87		79.8542	84.2083	78.8333		36.8131	36.9733	37.0192
483	2017-09-22	01:00:00	89	36.87		80.2917	36.9592	79.5833		36.82	36.9592	36.9725
484	2017-09-22	01:30:00	82	36.87		80.1875	36.9546	36.935		36.8246	36.9546	36.935
485	2017-09-22	02:00:00	85	36.84		80.125	36.9767	36.9042		36.8285	36.9767	36.9042
486	2017-09-22	02:30:00	74	36.87		79.9167	85.5417	79.5		36.8331	36.9858	36.9042
487	2017-09-22	03:00:00	73	36.98		79.8542	82.4583	78.6667		36.836	36.9904	36.9133
488	2017-09-22	03:30:00	75	36.87		79.7292	81.375	78.6667		36.836	37.0733	36.9042
489	2017-09-22	04:00:00	66	36.87		79.5417	37.0779	76.9167		36.836	37.0779	36.895
490	2017-09-22	04:30:00		36.98		79.5745	37.0592	36.895		36.8383	37.0592	36.895
491	2017-09-22	05:00:00	64	37.04		79.5319	37.0371	36.9		36.8419	37.0371	36.9
492	2017-09-22	05:30:00	63	37.1		79.5745	76.5652	74.5455		36.849	37.0183	36.9192
493	2017-09-22	06:00:00	60	36.65		78.7021	76.3043	73.8182		36.8512	36.9833	36.9008
494	2017-09-22	06:30:00	50	36.98		78.3191	75.087	71		36.8604	36.9646	36.91
495	2017-09-22	07:00:00	75	36.98		78.0638	36.9458	69.7273		36.8673	36.9458	36.9192
496	2017-09-22	07:30:00	56	37.07		77.1064	36.9354	36.9358		36.8644	36.9354	36.9358
497	2017-09-22	08:00:00	68	36.98		77.0851	36.9258	36.9475		36.8619	36.9258	36.9475
498	2017-09-22	08:30:00	58	36.87		76.6596	72.2609	64.3636		36.8596	36.9258	36.9475
499	2017-09-22	09:00:00	133	36.34		78.1064	74.4348	69.8182		36.8415	36.9038	36.8942
500	2017-09-22	09:30:00	105	36.54		78.9362	75.7391	72.5455		36.86	36.8854	36.8667
501	2017-09-22	10:00:00	115	36.65		80.8723	36.8717	77		36.8717	36.8717	36.8483
502	2017-09-22	10:30:00	85	36.2		81.1489	36.8392	36.7833		36.8623	36.8392	36.7833
503	2017-09-22	11:00:00	84	36.65		81.1915	36.8254	36.7508		36.8623	36.8254	36.7508
504	2017-09-22	11:30:00	60	36.54		80.5319	76.913	79.0833		36.8577	36.8117	36.7042
505	2017-09-22	12:00:00	60	36.65		79.5745	76.5652	79.0833		36.8671	36.8025	36.7042
506	2017-09-22	12:30:00	45	36.65		79.7021	75	78.6667		36.8833	36.7933	36.6767
507	2017-09-22	13:00:00	88	35.98		80.3404	36.7563	79.75		36.8577	36.7563	36.5933
508	2017-09-22	13:30:00		36.31		80.6304	36.7329	36.53		36.8438	36.7329	36.53
509	2017-09-22	14:00:00	51	36.76		80.087	36.7296	36.5117		36.8531	36.7296	36.5117
510	2017-09-22	14:30:00	101	36.31		80.1739	74.3182	84.2727		36.846	36.7062	36.465
511	2017-09-22	15:00:00	55	35.87		78.1739	73.5	77.1818		36.8252	36.66	36.4258
512	2017-09-22	15:30:00	65	36.31		77.3913	73.0455	73.5455		36.855	36.6367	36.4067
513	2017-09-22	16:00:00	107	36.93		77.7174	36.6392	72.8182		36.8585	36.6392	36.43
514	2017-09-22	16:30:00	93	37.43		77.6522	36.6579	36.5325		36.8585	36.6579	36.5325
515	2017-09-22	17:00:00		37.43		77.2222	36.6742	36.5975		36.8556	36.6742	36.5975
516	2017-09-22	17:30:00	105	37.55		77.3333	78.1364	77		36.8556	36.6929	36.6817
517	2017-09-22	18:00:00	119	37.43		78.5111	80.8182	82.9		36.8544	36.7254	36.7467
518	2017-09-22	18:30:00	86	38		78.6889	82.4545	87		36.8663	36.7679	36.8592
519	2017-09-22	19:00:00	82	37.66		78.7333	36.7962	86.4		36.871	36.7962	36.9992
520	2017-09-22	19:30:00	85	37.55		78.8	36.8162	37.1025		36.8758	36.8162	37.1025
521	2017-09-22	20:00:00	83	37.32		78.9111	36.8304	37.1492		36.8781	36.8304	37.1492
522	2017-09-22	20:30:00	77	37.32		78.8	85.6364	87		36.8875	36.8492	37.2333
523	2017-09-22	21:00:00	85	37.1		78.8444	83.4545	89.7273		36.8923	36.8808	37.3358
524	2017-09-22	21:30:00	66	37.1		78.6444	81.6818	89.8182		36.8948	36.9042	37.4017
525	2017-09-22	22:00:00	28	36.98		77.3333	36.9179	82.6364		36.8948	36.9179	37.4058
526	2017-09-22	22:30:00	85	36.87		77.6222	36.9458	37.3592		36.8925	36.9458	37.3592
527	2017-09-22	23:00:00	81	37.21		77.9111	36.9692	37.3408		36.8973	36.9692	37.3408
528	2017-09-22	23:30:00	85	36.76		77.8	78.7273	80.1667		36.895	36.9783	37.275
529	2017-09-23	00:00:00	76	36.87		77.9778	79.4545	76.5833		36.895	36.9875	37.2283
530	2017-09-23	00:30:00	84	36.87		78.0444	81.2273	76.4167		36.895	36.9967	37.1342
531	2017-09-23	01:00:00	63	36.87		77.4667	37.0338	74.8333		36.895	37.0338	37.0683
532	2017-09-23	01:30:00	78	36.87		77.3778	37.0571	37.0117		36.895	37.0571	37.0117
533	2017-09-23	02:00:00	74	36.84		77.1333	37.0604	36.9717		36.895	37.0604	36.9717
534	2017-09-23	02:30:00	83	36.87		77.3333	80.2174	74		36.895	37.0838	36.9342
535	2017-09-23	03:00:00	78	36.87		77.4444	81.2174	73.4167		36.8927	37.1254	36.915
536	2017-09-23	03:30:00	59	36.87		77.0889	80.9565	72.8333		36.8927	37.1487	36.8958
537	2017-09-23	04:00:00	72	36.87		77.2222	37.1463	76.5		36.8927	37.1463	36.8867
538	2017-09-23	04:30:00	54	36.82		76.7174	37.1208	36.8825		36.8894	37.1208	36.8825
539	2017-09-23	05:00:00	52	36.65		76.4565	37.0883	36.8358		36.8812	37.0883	36.8358
540	2017-09-23	05:30:00	82	36.2		76.8696	75.7083	71.25		36.8625	37.0321	36.7892
541	2017-09-23	06:00:00	60	36.43		76.8696	73.25	69.9167		36.8579	36.9904	36.7525
542	2017-09-23	06:30:00	35	36.76		76.5435	71.125	65.8333		36.8533	36.9387	36.7433
543	2017-09-23	07:00:00	174	36.87		78.6957	36.9058	75.0833		36.851	36.9058	36.7433
544	2017-09-23	07:30:00	64	36.98		78.8696	36.8821	36.7525		36.8492	36.8821	36.7525
545	2017-09-23	08:00:00	57	36.98		78.6304	36.8679	36.7642		36.8492	36.8679	36.7642
546	2017-09-23	08:30:00	53	36.98		78.5217	72	70		36.8515	36.8538	36.7733
547	2017-09-23	09:00:00	72	36.87		77.1957	71.4583	69.5		36.8625	36.8442	36.7733
548	2017-09-23	09:30:00	133	36.2		77.8043	74.25	75.6667		36.8554	36.8067	36.7175
549	2017-09-23	10:00:00	73	36.54		76.8913	36.7883	75.75		36.8531	36.7883	36.69
550	2017-09-23	10:30:00	55	36.98		76.2391	36.7929	36.7033		36.8694	36.7929	36.7033
551	2017-09-23	11:00:00	58	34.33		75.6739	36.6729	36.51		36.821	36.6729	36.51
552	2017-09-23	11:30:00	76	36.54		76.0217	73.5417	75.8333		36.821	36.6638	36.5383
553	2017-09-23	12:00:00	84	36.93		76.5435	73.875	77.8333		36.8269	36.6662	36.58
554	2017-09-23	12:30:00	97	37.55		77.6739	74.4167	83		36.8456	36.6946	36.6458
555	2017-09-23	13:00:00	45	37.66		76.7391	36.7275	72.25		36.8806	36.7275	36.7117
556	2017-09-23	13:30:00	66	37.21		76.5106	36.7417	36.7308		36.8994	36.7417	36.7308
557	2017-09-23	14:00:00	33	36.87		76.1277	36.7429	36.7217		36.9017	36.7429	36.7217
558	2017-09-23	14:30:00	131	36.65		76.766	73.4583	76.9167		36.9088	36.7337	36.6942
559	2017-09-23	15:00:00		35.87		77.2391	73.2609	77.3636		36.9088	36.6921	36.6108
560	2017-09-23	15:30:00	84	36.31		77.6522	74.3478	72.9091		36.9087	36.6687	36.62
561	2017-09-23	16:00:00	92	36.76		77.3261	36.6642	74.6364		36.9052	36.6642	36.6383
562	2017-09-23	16:30:00	163	37.55		78.8478	36.6946	36.6858		36.9077	36.6946	36.6858
563	2017-09-23	17:00:00	94	37.55		79.1702	36.7321	36.9542		36.9102	36.7321	36.9542
564	2017-09-23	17:30:00	101	37.66		79.0851	82.6087	90		36.9125	36.7929	37.0475
565	2017-09-23	18:00:00	81	37.66		78.2766	83.5217	89.7273		36.9173	36.8442	37.1083
566	2017-09-23	18:30:00	90	37.43		78.3617	85.913	89.0909		36.9054	36.8721	37.0983
567	2017-09-23	19:00:00	71	37.1		78.1277	36.8817	91.4545		36.8937	36.8817	37.0517
568	2017-09-23	19:30:00	72	37.1		77.8511	36.8867	37.0425		36.8844	36.8867	37.0425
569	2017-09-23	20:00:00	75	36.87		77.6809	36.8821	37.0425		36.875	36.8821	37.0425
570	2017-09-23	20:30:00	87	36.87		77.8936	84.0435	91.8182		36.8656	36.8775	37.0608
571	2017-09-23	21:00:00	85	36.87		77.8936	84.6087	91.25		36.8608	36.8775	37.1442
572	2017-09-23	21:30:00	81	36.98		78.2128	82.3478	91		36.8583	36.91	37.2
573	2017-09-23	22:00:00	78	36.87		79.2766	36.9237	89.8333		36.856	36.9237	37.2092
574	2017-09-23	22:30:00	82	36.98		79.2128	36.9238	37.1617		36.8583	36.9238	37.1617
575	2017-09-23	23:00:00	85	37.1		79.2979	37.0392	37.1242		36.856	37.0392	37.1242
576	2017-09-23	23:30:00	78	37.1		79.1489	85	80.4167		36.8631	37.0625	37.0775
577	2017-09-24	00:00:00	79	37.1		79.2128	84.7826	80.25		36.8679	37.0696	37.0308
578	2017-09-24	00:30:00	80	36.98		79.1277	84.0435	79.4167		36.8702	37.0458	36.9933
579	2017-09-24	01:00:00	78	36.98		79.4468	37.0175	80		36.8725	37.0175	36.9833
580	2017-09-24	01:30:00	63	36.87		79.1277	37.0033	36.9642		36.8725	37.0033	36.9642
581	2017-09-24	02:00:00	61	36.87		78.8511	37.0033	36.9642		36.8731	37.0033	36.9642
582	2017-09-24	02:30:00	72	35.87		78.617	84	76.8333		36.8523	36.9708	36.8808
583	2017-09-24	03:00:00	50	36.09		78.0213	82.5833	73.9167		36.836	36.98	36.8158
584	2017-09-24	03:30:00	76	36.54		78.383	82.25	73.5		36.8292	36.9896	36.7792
585	2017-09-24	04:00:00	75	36.65		78.4468	36.985	73.25		36.8246	36.985	36.7608
586	2017-09-24	04:30:00	72	36.65		78.8298	36.9475	36.7333		36.821	36.9475	36.7333
587	2017-09-24	05:00:00	84	36.76		79.5106	36.9146	36.705		36.8233	36.9146	36.705
588	2017-09-24	05:30:00	79	36.65		79.4468	76.4167	72.4167		36.8327	36.8725	36.6675
589	2017-09-24	06:00:00	70	36.31		79.6596	75.9583	71.6667		36.8302	36.8163	36.6017
590	2017-09-24	06:30:00	46	36.54		79.8936	74.125	68.8333		36.8256	36.7792	36.565
591	2017-09-24	07:00:00	70	36.54		77.6809	36.7558	68.1667		36.8187	36.7558	36.5283
592	2017-09-24	07:30:00	45	36.76		77.2766	36.7417	36.5192		36.8142	36.7417	36.5192
593	2017-09-24	08:00:00	49	36.96		77.1064	36.7454	36.5267		36.8137	36.7454	36.5267
594	2017-09-24	08:30:00	54	36.87		77.1277	70.5	64.1667		36.8115	36.7454	36.61
595	2017-09-24	09:00:00	58	35.98		76.8298	69.375	64.8333		36.7929	36.7083	36.6008
596	2017-09-24	09:30:00	86	36.43		75.8298	69.5833	65.6667		36.7977	36.6854	36.5917
597	2017-09-24	10:00:00	81	36.01		76	36.6496	66.1667		36.7867	36.6496	36.5383
598	2017-09-24	10:30:00	88	35.43		76.7021	36.585	36.4367		36.7544	36.585	36.4367
599	2017-09-24	11:00:00	107	36.76		77.7447	36.5708	36.4367		36.805	36.5708	36.4367
600	2017-09-24	11:30:00	75	36.76		77.7234	70.75	69.0833		36.8096	36.5567	36.4458
601	2017-09-24	12:00:00	70	36.76		77.4255	70.375	69.0833		36.806	36.5425	36.4833
602	2017-09-24	12:30:00	182	36.43		79.234	74.625	80.4167		36.7827	36.5196	36.4742
603	2017-09-24	13:00:00	68	36.98		79.7234	36.5196	80.25		36.7685	36.5196	36.5108
604	2017-09-24	13:30:00	73	35.87		79.8723	36.4779	36.4367		36.7406	36.4779	36.4367
605	2017-09-24	14:00:00		36.54		80.8913	36.4642	36.4017		36.7338	36.4642	36.4017
606	2017-09-24	14:30:00	86	36.31		79.913	75.8261	88.5455		36.7267	36.4825	36.355
607	2017-09-24	15:00:00	63	36.87		79.5532	76.3913	89		36.7475	36.515	36.4292
608	2017-09-24	15:30:00	96	37.32		79.8085	77.2609	89.9091		36.7685	36.5475	36.5033
609	2017-09-24	16:00:00	182	36.65		81.7234	36.5475	99.0909		36.7662	36.5475	36.5567
610	2017-09-24	16:30:00	104	37.66		80.4681	36.5896	36.7425		36.7685	36.5896	36.7425
611	2017-09-24	17:00:00	101	37.77		80.617	36.6317	36.8267		36.7731	36.6317	36.8267
612	2017-09-24	17:30:00	107	38		80.7447	85.2609	102.909		36.7802	36.6879	36.93
613	2017-09-24	18:00:00	75	37.89		80.617	85.4783	103.364		36.785	36.7537	37.0242
614	2017-09-24	18:30:00	83	37.66		80.4681	87.087	94.3636		36.7898	36.8004	37.1267
615	2017-09-24	19:00:00	64	37.43		80.3191	36.8375	94		36.7967	36.8375	37.1642
616	2017-09-24	19:30:00	100	37.21		80.9149	36.8562	37.2758		36.799	36.8562	37.2758
617	2017-09-24	20:00:00	87	36.98		81.1702	36.8571	37.3125		36.8013	36.8571	37.3125
618	2017-09-24	20:30:00	65	37.21		80.7021	91.3478	93.9167		36.8083	36.8712	37.3875
619	2017-09-24	21:00:00	69	37.12		80.3617	91.8261	94.4167		36.8135	36.9187	37.4083
620	2017-09-24	21:30:00	82	37.21		80.383	91.6522	93.25		36.8183	36.9512	37.3992
621	2017-09-24	22:00:00	83	36.98		80.4894	36.9917	85		36.8206	36.9917	37.4267
622	2017-09-24	22:30:00	80	37.18		80.4468	37.0646	37.3867		36.8248	37.0646	37.3867
623	2017-09-24	23:00:00	82	36.98		80.383	37.0737	37.3208		36.8223	37.0737	37.3208
624	2017-09-24	23:30:00	85	37.1		80.5319	90.7391	79.5833		36.8223	37.0879	37.2458
625	2017-09-25	00:00:00	76	37.21		80.4681	91	79.6667		36.8246	37.1067	37.1892
626	2017-09-25	00:30:00	93	37.15		80.7447	87.1304	80.5		36.8281	37.1367	37.1467
627	2017-09-25	01:00:00	84	37.1		80.8723	37.1417	82.1667		36.8306	37.1417	37.1192
628	2017-09-25	01:30:00	82	36.98		81.2766	37.1879	37.1		36.8329	37.1879	37.1
629	2017-09-25	02:00:00	70	37.1		81.4681	37.2112	37.11		36.8377	37.2112	37.11
630	2017-09-25	02:30:00	87	37.01		81.7872	87.5	81.0833		36.8615	37.2404	37.0933
631	2017-09-25	03:00:00	89	37.1		82.617	88.5833	82.75		36.8825	37.25	37.0917
632	2017-09-25	03:30:00	58	36.54		82.234	87	80.75		36.8825	37.2175	37.0358
633	2017-09-25	04:00:00	76	36.87		82.2553	37.2267	80.1667		36.8871	37.2267	37.0267
634	2017-09-25	04:30:00	70	36.87		82.2128	37.1938	37.0008		36.8917	37.1938	37.0008
635	2017-09-25	05:00:00	68	36.87		81.8723	37.1563	36.9917		36.894	37.1563	36.9917
636	2017-09-25	05:30:00	66	36.79		81.5957	78.0833	76.5833		36.8969	37.1058	36.9658
637	2017-09-25	06:00:00	159	36.65		83.4894	81.5833	83.5		36.904	37.0542	36.9192
638	2017-09-25	06:30:00	110	36.76		84.8511	82.7083	84.9167		36.9085	37.0167	36.8867
639	2017-09-25	07:00:00	66	36.87		84.766	36.9933	83.4167		36.9154	36.9933	36.8675
640	2017-09-25	07:30:00	52	36.98		84.9149	36.9838	36.8675		36.92	36.9838	36.8675
641	2017-09-25	08:00:00	84	36.87		85.6596	36.9792	36.8483		36.9181	36.9792	36.8483
642	2017-09-25	08:30:00	77	36.76		86.1489	81.1667	81.25		36.9158	36.9604	36.8275
643	2017-09-25	09:00:00	82	36.76		86.6596	81.7083	80.6667		36.9321	36.9454	36.7992
644	2017-09-25	09:30:00		36.65		86.6739	81.6957	82.7273		36.9367	36.9221	36.8083
645	2017-09-25	10:00:00	87	36.59		86.8043	36.9058	83.7273		36.9487	36.9058	36.785
646	2017-09-25	10:30:00	178	36.98		88.7609	36.8975	36.7942		36.981	36.8975	36.7942
647	2017-09-25	11:00:00	65	36.54		87.8478	36.8792	36.7667		36.9765	36.8792	36.7667
648	2017-09-25	11:30:00	78	36.76		87.913	85.087	94.3636		36.9765	36.865	36.7642
649	2017-09-25	12:00:00	82	36.87		88.1739	85.3478	87.3636		36.9787	36.8508	36.7825
650	2017-09-25	12:30:00	83	36.87		86.0217	84.913	84.9091		36.9879	36.8392	36.7917
651	2017-09-25	13:00:00		34.33		86.4222	36.7238	86.8		36.9327	36.7238	36.58
652	2017-09-25	13:30:00	136	36.43		87.8222	36.7008	36.5342		36.9444	36.7008	36.5342
653	2017-09-25	14:00:00	166	35.98		89.5217	36.6542	36.46		36.9327	36.6542	36.46
654	2017-09-25	14:30:00	34	34.8		88.3913	89.3636	99.1		36.9012	36.5621	36.2967
655	2017-09-25	15:00:00	83	36.54		88.8261	89.0909	99.2		36.8944	36.5388	36.2783
656	2017-09-25	15:30:00	113	36.98		89.1957	91.5909	100.455		36.8873	36.5571	36.3058
657	2017-09-25	16:00:00	129	36.54		88.0435	36.5433	104.273		36.885	36.5433	36.3017
658	2017-09-25	16:30:00	94	37.21		87.8261	36.5575	36.3208		36.8756	36.5575	36.3208
659	2017-09-25	17:00:00	97	37.66		87.7391	36.5904	36.4142		36.8733	36.5904	36.4142
660	2017-09-25	17:30:00	89	37.55		87.3478	97.4545	100.545		36.864	36.6221	36.48
661	2017-09-25	18:00:00	63	37.55		87.087	93.0909	98.8182		36.8569	36.6596	36.5367
662	2017-09-25	18:30:00	87	37.43		87.1739	92.0455	99.1818		36.8521	36.6875	36.5833
663	2017-09-25	19:00:00	84	37.43		87.6087	36.7108	97.9167		36.8521	36.7108	36.8417
664	2017-09-25	19:30:00	85	37.32		87.2826	36.725	36.9158		36.8544	36.725	36.9158
665	2017-09-25	20:00:00	88	37.21		87.3043	36.7392	37.0183		36.8592	36.7392	37.0183
666	2017-09-25	20:30:00	79	37.1		87.6087	94.6364	90.9167		36.8569	36.7533	37.21
667	2017-09-25	21:00:00	88	37.21		88.0217	94.9091	91.3333		36.8587	36.7721	37.2658
668	2017-09-25	21:30:00	78	37.21		87.9348	94.1739	88.4167		36.8587	36.7954	37.285
669	2017-09-25	22:00:00	81	37.32		87.8913	36.8258	84.4167		36.8658	36.8258	37.35
670	2017-09-25	22:30:00	89	37.32		88.087	36.84	37.3592		36.8687	36.84	37.3592
671	2017-09-25	23:00:00	78	37.32		88	36.8725	37.3308		36.8758	36.8725	37.3308
672	2017-09-25	23:30:00	82	37.32		87.9348	90.7826	81.8333		36.8804	36.8958	37.3117
673	2017-09-26	00:00:00	86	37.41		88.1522	90.9565	83.75		36.8846	36.9183	37.3
674	2017-09-26	00:30:00	93	37.32		88.1522	91.3913	84.25		36.8881	36.9371	37.2908
675	2017-09-26	01:00:00	85	37.21		88.1739	37.0571	84.3333		36.8904	37.0571	37.2725
676	2017-09-26	01:30:00	64	37.21		87.7826	37.0896	37.2633		36.8952	37.0896	37.2633
677	2017-09-26	02:00:00	70	36.98		87.7826	37.1313	37.2442		36.8927	37.1313	37.2442
678	2017-09-26	02:30:00	81	36.98		87.6522	86.0833	81.25		36.8921	37.2221	37.2342
679	2017-09-26	03:00:00	75	36.98		87.3478	85.75	80.1667		36.8896	37.2404	37.215
680	2017-09-26	03:30:00	88	37.15		88	84.7083	81		36.9023	37.2475	37.21
681	2017-09-26	04:00:00	75	37.1		87.9783	37.2708	80.5		36.9071	37.2708	37.1917
682	2017-09-26	04:30:00	60	37.1		87.7609	37.2663	37.1733		36.9119	37.2663	37.1733
683	2017-09-26	05:00:00	100	36.7		88.4565	37.2263	37.1217		36.9083	37.2263	37.1217
684	2017-09-26	05:30:00	83	36.76		88.8261	80.9167	80		36.9077	37.1933	37.075
685	2017-09-26	06:00:00	86	36.87		87.2391	81.875	80		36.9123	37.165	37.03
686	2017-09-26	06:30:00	71	36.87		86.3913	81.2083	78.1667		36.9146	37.1417	36.9925
687	2017-09-26	07:00:00	78	36.98		86.6522	37.1229	77.5833		36.9169	37.1229	36.9733
688	2017-09-26	07:30:00	92	37.1		87.5217	37.1138	36.9642		36.9194	37.1138	36.9642
689	2017-09-26	08:00:00	60	36.98		87	37.1042	36.9642		36.9217	37.1042	36.9642
690	2017-09-26	08:30:00	84	36.87		87.1522	80.2917	79.3333		36.924	37.0946	36.955
691	2017-09-26	09:00:00	57	36.84		86.6087	79	77.8333		36.9256	37.0792	36.9433
692	2017-09-26	09:30:00	66	36.87		86.1702	78.5	76		36.9302	37.065	36.92
693	2017-09-26	10:00:00	72	36.87		85.8511	37.0463	75.75		36.936	37.0463	36.9008
694	2017-09-26	10:30:00	57	36.76		83.2766	37.0229	36.8725		36.9315	37.0229	36.8725
695	2017-09-26	11:00:00	70	36.76		83.383	36.9996	36.8775		36.936	36.9996	36.8775
696	2017-09-26	11:30:00	88	36.76		83.5957	76.7083	73.4167		36.936	36.9763	36.8775
697	2017-09-26	12:00:00	108	36.15		84.1489	77.625	75.25		36.921	36.9238	36.8175
698	2017-09-26	12:30:00	85	36.43		84.1915	77.2917	76.4167		36.9119	36.8867	36.7808
699	2017-09-26	13:00:00	100	36.87		84.5208	36.8725	78.25		36.9648	36.8725	36.7717
700	2017-09-26	13:30:00	94	35.87		83.6458	36.8167	36.6692		36.9531	36.8167	36.6692
701	2017-09-26	14:00:00	92	36.43		82.1042	36.7937	36.6233		36.9625	36.7937	36.6233
702	2017-09-26	14:30:00	117	37.18		83.8333	81.5833	83.8333		37.0121	36.8021	36.6492
703	2017-09-26	15:00:00	110	37.21		84.3958	83.0417	88.25		37.026	36.8117	36.68
704	2017-09-26	15:30:00	66	37.1		83.4167	82.125	88.25		37.0285	36.8096	36.6992
705	2017-09-26	16:00:00	66	37.21		82.1042	36.8142	87.75		37.0425	36.8142	36.7275
706	2017-09-26	16:30:00	105	37.32		82.3333	36.8233	36.7742		37.0448	36.8233	36.7742
707	2017-09-26	17:00:00	55	37.69		81.4583	36.8646	36.8517		37.0454	36.8646	36.8517
708	2017-09-26	17:30:00	108	37.77		81.8542	82.7917	92.1667		37.05	36.9067	36.9358
709	2017-09-26	18:00:00	100	37.63		82.625	83.375	91.5		37.0517	36.9383	37.0592
710	2017-09-26	18:30:00	97	37.43		82.8333	84.4583	92.5		37.0517	36.9617	37.1425
711	2017-09-26	19:00:00	77	37.55		82.6875	36.9854	90.5833		37.0542	36.9854	37.1992
712	2017-09-26	19:30:00	65	37.43		82.2708	36.9992	37.3292		37.0565	36.9992	37.3292
713	2017-09-26	20:00:00	60	36.98		81.6875	36.9992	37.375		37.0517	36.9992	37.375
714	2017-09-26	20:30:00	92	36.98		81.9583	83.625	83.4167		37.0492	37.0038	37.3583
715	2017-09-26	21:00:00	88	37.21		81.9583	84.9167	81.5833		37.0492	37.0192	37.3583
716	2017-09-26	21:30:00	85	37.43		82.1042	85.7083	83.1667		37.0538	37.0425	37.3858
717	2017-09-26	22:00:00	85	37.43		82.1875	37.0658	84.75		37.056	37.0658	37.4042
718	2017-09-26	22:30:00	75	37.43		81.8958	37.0937	37.4133		37.0583	37.0937	37.4133
719	2017-09-26	23:00:00	71	37.32		81.75	37.1171	37.3825		37.0583	37.1171	37.3825
720	2017-09-26	23:30:00	87	37.21		81.8542	87	81.8333		37.056	37.1358	37.3358
721	2017-09-27	00:00:00	94	37.21		82.0208	86.4167	81.3333		37.0519	37.18	37.3008
722	2017-09-27	00:30:00	80	37.32		81.75	86.2083	79.9167		37.0519	37.2171	37.2917
723	2017-09-27	01:00:00	86	37.32		81.7708	37.2358	80.6667		37.0542	37.2358	37.2725
724	2017-09-27	01:30:00	76	36.76		82.0208	37.2729	37.2167		37.0448	37.2729	37.2167
725	2017-09-27	02:00:00	86	36.87		82.3542	37.2913	37.2075		37.0425	37.2913	37.2075
726	2017-09-27	02:30:00	81	36.87		82.3542	83.125	82.8333		37.0402	37.2783	37.1983
727	2017-09-27	03:00:00	72	36.98		82.2917	81.5417	81.5		37.0402	37.2688	37.1792
728	2017-09-27	03:30:00	79	37.1		82.1042	82.0833	81		37.0392	37.2688	37.1517
729	2017-09-27	04:00:00	64	36.98		81.875	37.2592	79.25		37.0367	37.2592	37.1142
730	2017-09-27	04:30:00	70	36.98		82.0833	37.245	37.0767		37.0342	37.245	37.0767
731	2017-09-27	05:00:00	84	37.15		81.75	37.2225	37.0625		37.0435	37.2225	37.0625
732	2017-09-27	05:30:00	42	37.21		80.8958	79	76.1667		37.0529	37.1992	37.0625
733	2017-09-27	06:00:00	93	36.98		81.0417	78.7083	76.0833		37.0552	37.1721	37.0433
734	2017-09-27	06:30:00	26	37.55		80.1042	75.75	71.5833		37.0694	37.1771	37.0625
735	2017-09-27	07:00:00	78	37.66		80.1042	37.1817	70.9167		37.0835	37.1817	37.0908
736	2017-09-27	07:30:00		37.43		79.8511	37.1817	37.1467		37.0904	37.1817	37.1467
737	2017-09-27	08:00:00	79	37.21		80.2553	37.1912	37.175		37.0952	37.1912	37.175
738	2017-09-27	08:30:00	86	37.1		80.2979	76.8261	70.2727		37.1	37.1962	37.1942
739	2017-09-27	09:00:00	75	37.1		80.6809	76.2609	70.5455		37.1054	37.1917	37.2042
740	2017-09-27	09:30:00	63	37.21		80.617	75.3043	69.0909		37.1125	37.1825	37.2133
741	2017-09-27	10:00:00	56	37.1		80.2766	37.1688	68.3636		37.1173	37.1688	37.2233
742	2017-09-27	10:30:00	43	36.98		79.9787	37.15	37.2233		37.1219	37.15	37.2233
743	2017-09-27	11:00:00	80	36.76		80.1915	37.1267	37.1908		37.1219	37.1267	37.1908
744	2017-09-27	11:30:00	74	36.87		79.8936	72.4783	68.4545		37.1242	37.1125	37.1625
745	2017-09-27	12:00:00	76	36.98		79.2128	71.6957	66.9091		37.1415	37.1029	37.1625
746	2017-09-27	12:30:00	43	35.54		78.3191	70.087	68.4545		37.1229	37.0288	36.995
747	2017-09-27	13:00:00	147	36.43		79.3191	36.9917	74.7273		37.1138	36.9917	36.8925
748	2017-09-27	13:30:00	97	36.98		79.383	37.0008	36.855		37.1369	37.0008	36.855
749	2017-09-27	14:00:00	72	37.32		78.9574	37.0196	36.8642		37.1554	37.0196	36.8642
750	2017-09-27	14:30:00	64	37.32		77.8298	72.3043	74.1667		37.1583	37.0383	36.8825
751	2017-09-27	15:00:00	63	37.32		76.8298	71.913	73.1667		37.1606	37.0525	36.9008
752	2017-09-27	15:30:00	60	37.18		76.7021	71.087	72.9167		37.1623	37.0558	36.8983
753	2017-09-27	16:00:00		37.52		76.9348	37.0783	74.4545		37.1687	37.0783	36.9333
754	2017-09-27	16:30:00	92	37.66		76.6522	37.1067	36.99		37.1758	37.1067	36.99
755	2017-09-27	17:00:00	93	37.55		77.4783	37.1233	37.0558		37.1729	37.1233	37.0558
756	2017-09-27	17:30:00	108	37.55		77.4783	75.8182	83.1818		37.1683	37.1375	37.1125
757	2017-09-27	18:00:00	94	37.74		77.3478	75.8636	84.8182		37.1706	37.1692	37.1758
758	2017-09-27	18:30:00	86	37.55		77.1087	78.5909	88.7273		37.1731	37.1692	37.3433
759	2017-09-27	19:00:00	88	37.66		77.3478	37.1692	83.3636		37.1754	37.1692	37.4458
760	2017-09-27	19:30:00	101	37.21		78.1304	37.16	37.465		37.1708	37.16	37.465
761	2017-09-27	20:00:00	78	37.32		78.5217	37.1646	37.465		37.1779	37.1646	37.465
762	2017-09-27	20:30:00	82	37.43		78.3043	79.7826	85.9091		37.1873	37.1783	37.4742
763	2017-09-27	21:00:00	102	37.32		78.6087	80.9565	89.4545		37.1896	37.1875	37.4742
764	2017-09-27	21:30:00	90	37.55		78.7174	82.1304	92.1818		37.1921	37.2017	37.505
765	2017-09-27	22:00:00	85	37.43		78.7174	37.2154	91.5833		37.1921	37.2154	37.4975
766	2017-09-27	22:30:00	82	37.32		78.8696	37.2296	37.4692		37.1898	37.2296	37.4692
767	2017-09-27	23:00:00	83	37.21		79.1304	37.2483	37.4408		37.1875	37.2483	37.4408
768	2017-09-27	23:30:00	84	37.1		79.0652	85.6522	87.9167		37.1852	37.2579	37.4033
769	2017-09-28	00:00:00		37.1		78.7333	86.0909	87.3636		37.1829	37.2629	37.35
770	2017-09-28	00:30:00	85	37.21		78.8444	88	87.2727		37.1806	37.3325	37.3217
771	2017-09-28	01:00:00	84	37.21		78.8	37.365	86.9091		37.1783	37.365	37.2842
772	2017-09-28	01:30:00	84	37.32		78.9778	37.3792	37.2933		37.19	37.3792	37.2933
773	2017-09-28	02:00:00	82	37.32		78.8889	37.3792	37.2933		37.1994	37.3792	37.2933
774	2017-09-28	02:30:00	102	37.21		79.3556	86.7273	87.5455		37.2065	37.3746	37.275
775	2017-09-28	03:00:00	74	37.21		79.4	87.2273	85		37.2112	37.37	37.2658
776	2017-09-28	03:30:00	76	37.21		79.3333	87.9545	83.7273		37.2135	37.3713	37.2375
777	2017-09-28	04:00:00	73	37.21		79.5333	37.3583	82.6364		37.2183	37.3583	37.2192
778	2017-09-28	04:30:00	85	37.1		79.8667	37.335	37.2008		37.2208	37.335	37.2008
779	2017-09-28	05:00:00	83	37.12		79.8444	37.3171	37.1933		37.2202	37.3171	37.1933
780	2017-09-28	05:30:00	63	36.87		80.3111	84.6087	81		37.2131	37.2888	37.1742
781	2017-09-28	06:00:00	61	37.1		79.6	83.1739	79.3333		37.2156	37.2621	37.1742
782	2017-09-28	06:30:00	85	37.1		80.9111	83.1304	79.3333		37.2062	37.2433	37.165
783	2017-09-28	07:00:00	85	36.87		81.0667	37.2104	79.4167		37.1898	37.2104	37.1367
784	2017-09-28	07:30:00		36.54		81.0667	37.1825	37.0717		37.1712	37.1825	37.0717
785	2017-09-28	08:00:00	47	35.32		80.3556	37.0992	36.905		37.1319	37.0992	36.905
786	2017-09-28	08:30:00	131	35.65		81.3556	83	78.4545		37.1017	37.025	36.775
787	2017-09-28	09:00:00	60	36.76		81.0222	81.0909	77.1818		37.0946	37.0017	36.7375
788	2017-09-28	09:30:00		35.98		81.4318	80.6667	77.3		37.069	36.9362	36.635
789	2017-09-28	10:00:00	105	36.17		82.5455	36.8837	80.5		37.0496	36.8837	36.5483
790	2017-09-28	10:30:00		35.21		83.4651	36.7958	36.3908		37.0127	36.7958	36.3908
791	2017-09-28	11:00:00	88	36.76		83.6512	36.7771	36.3608		37.0127	36.7771	36.3608
792	2017-09-28	11:30:00	75	36.87		83.6744	81.4	81.8889		37.0127	36.7675	36.3608
793	2017-09-28	12:00:00	50	36.87		83.0698	79.9048	80.6667		37.0104	36.7579	36.3417
794	2017-09-28	12:30:00	66	36.87		83.6047	79	78.5556		37.0381	36.7438	36.3225
795	2017-09-28	13:00:00	93	36.7		82.3488	36.7225	79.4444		37.0437	36.7225	36.3083
796	2017-09-28	13:30:00	74	37.1		81.814	36.7133	36.355		37.0462	36.7133	36.355
797	2017-09-28	14:00:00	89	37.21		82.2093	36.7088	36.5125		37.044	36.7088	36.5125
798	2017-09-28	14:30:00	43	37.1		81.7209	76.4762	74.3		37.0394	36.7042	36.6333
799	2017-09-28	15:00:00	117	37.1		82.9767	78.5238	80		37.0348	36.6996	36.6617
800	2017-09-28	15:30:00	60	36.98		82.9767	77.7619	78.1818		37.0306	36.69	36.745
801	2017-09-28	16:00:00	89	36.98		83.1136	36.6804	76.7273		37.0194	36.6804	36.8125
802	2017-09-28	16:30:00	96	37.55		83.2045	36.6992	37.0075		37.0171	36.6992	37.0075
803	2017-09-28	17:00:00	102	37.55		83.4091	36.7171	37.0733		37.0171	36.7171	37.0733
804	2017-09-28	17:30:00	101	37.43		83.25	81.7619	81.6667		37.0146	36.7404	37.12
805	2017-09-28	18:00:00	97	37.21		83.3182	83.4762	85.5833		37.0035	36.745	37.1483
806	2017-09-28	18:30:00	85	37.55		83.2955	83.4762	87.1667		37.0035	36.7637	37.205
807	2017-09-28	19:00:00	85	37.55		83.2273	36.7921	86.5		37.0012	36.7921	37.2758
808	2017-09-28	19:30:00	87	37.32		82.9091	36.8246	37.2942		37.0035	36.8246	37.2942
809	2017-09-28	20:00:00	87	37.41		83.1136	36.9117	37.3108		37.0054	36.9117	37.3108
810	2017-09-28	20:30:00	104	37.1		83.6136	84.2273	92.5		36.9985	36.9721	37.3108
811	2017-09-28	21:00:00	94	37.21		83.4318	85.7727	90.5833		36.9962	36.9908	37.32
812	2017-09-28	21:30:00	87	37.32		83.3636	85.8261	92.8333		36.9915	37.0467	37.3483
813	2017-09-28	22:00:00	85	37.1		83.3636	37.0854	92.5		36.9846	37.0854	37.3583
814	2017-09-28	22:30:00	89	37.21		83.5227	37.1688	37.33		36.9823	37.1688	37.33
815	2017-09-28	23:00:00	86	37.1		83.5909	37.1829	37.2925		36.98	37.1829	37.2925
816	2017-09-28	23:30:00	81	36.98		83.5227	85.2917	88.9167		36.9775	37.1875	37.255
817	2017-09-29	00:00:00	83	37.1		83.5111	86.6667	87.75		36.9775	37.1971	37.2458
818	2017-09-29	00:30:00	87	37.21		83.5556	87.5417	87.9167		36.9775	37.2113	37.2175
819	2017-09-29	01:00:00	63	37.21		83.0889	37.2325	86.0833		36.9775	37.2325	37.1892
820	2017-09-29	01:30:00	89	37.21		83.2	37.2371	37.18		36.9752	37.2371	37.18
821	2017-09-29	02:00:00	78	37.1		83.1111	37.2325	37.1542		36.9706	37.2325	37.1542
822	2017-09-29	02:30:00	84	37.1		82.7111	88.1667	83.8333		36.9683	37.2325	37.1542
823	2017-09-29	03:00:00	83	36.98		82.9111	86.75	82.9167		36.9635	37.2275	37.135
824	2017-09-29	03:30:00	66	36.98		82.6889	87	81.1667		36.9587	37.2275	37.1067
825	2017-09-29	04:00:00	55	36.98		82.2889	37.2275	78.6667		36.954	37.2275	37.0967
826	2017-09-29	04:30:00	82	36.96		82.2222	37.2029	37.0758		36.951	37.2029	37.0758
827	2017-09-29	05:00:00	78	36.43		82.1111	37.1563	37.02		36.9367	37.1563	37.02
828	2017-09-29	05:30:00	93	36.62		82.7778	83.6667	78.4167		36.9315	37.1225	36.99
829	2017-09-29	06:00:00	19	36.54		81.8444	80.4167	73.0833		36.9198	37.0946	36.9433
830	2017-09-29	06:30:00	47	36.98		81	78.8333	69.75		36.9173	37.0708	36.9242
831	2017-09-29	07:00:00	89	36.87		81.0889	37.0425	71.9167		36.9173	37.0425	36.8958
832	2017-09-29	07:30:00	75	36.87		80.9565	37.0237	36.8675		36.9242	37.0237	36.8675
833	2017-09-29	08:00:00	98	36.76		82.0652	36.9967	36.8392		36.9542	36.9967	36.8392
834	2017-09-29	08:30:00	53	36.76		80.3696	76.8333	69.8333		36.9773	36.9825	36.8108
835	2017-09-29	09:00:00	76	36.76		80.7174	76.0833	69.25		36.9773	36.9637	36.7925
836	2017-09-29	09:30:00	75	36.65		80.5957	75.5833	70		36.9912	36.9358	36.765
837	2017-09-29	10:00:00	53	36.2		79.4894	36.8983	69.8333		36.9919	36.8983	36.7
838	2017-09-29	10:30:00	93	36.2		79.7708	36.8563	36.6367		37.0125	36.8563	36.6367
839	2017-09-29	11:00:00	129	36.87		80.625	36.8467	36.6733		37.0148	36.8467	36.6733
840	2017-09-29	11:30:00	97	36.87		81.0833	76.875	75.3333		37.0148	36.8421	36.6942
841	2017-09-29	12:00:00	50	36.76		81.0833	75.5	77.9167		37.0125	36.8279	36.7125
842	2017-09-29	12:30:00	69	34.82		81.1458	74.75	79.75		36.9698	36.7283	36.5325
843	2017-09-29	13:00:00	55	36.43		80.3542	36.6958	76.9167		36.9642	36.6958	36.4958
844	2017-09-29	13:30:00	104	36.76		80.9792	36.6771	36.4867		36.9571	36.6771	36.4867
845	2017-09-29	14:00:00	45	36.87		80.0625	36.6675	36.4958		36.95	36.6675	36.4958
846	2017-09-29	14:30:00	182	36.65		82.9583	77.75	85.6667		36.9406	36.6487	36.4867
847	2017-09-29	15:00:00	197	36.43		84.625	82.5	95.75		36.9267	36.6258	36.4592
848	2017-09-29	15:30:00	72	36.98		84.875	82.75	95.5		36.9267	36.6258	36.4867
849	2017-09-29	16:00:00	37	37.77		83.7917	36.6587	94.1667		36.9431	36.6587	36.6175
850	2017-09-29	16:30:00	97	37.77		83.8125	36.6925	36.7483		36.9477	36.6925	36.7483
851	2017-09-29	17:00:00	105	37.66		83.875	36.7437	36.8142		36.95	36.7437	36.8142
852	2017-09-29	17:30:00	98	37.32		83.8125	83.9583	92.5833		36.9477	36.7729	36.8517
853	2017-09-29	18:00:00		37.21		83.5319	86.7826	96.4545		36.9477	36.8008	36.8892
854	2017-09-29	18:30:00	89	37.66		83.617	88.6087	98.2727		36.95	36.8292	37.1258
855	2017-09-29	19:00:00	92	37.55		83.766	36.8575	101.636		36.95	36.8575	37.2192
856	2017-09-29	19:30:00	87	37.32		83.766	36.8762	37.2658		36.95	36.8762	37.2658
857	2017-09-29	20:00:00	80	37.32		83.617	36.8996	37.3033		36.9481	36.8996	37.3033
858	2017-09-29	20:30:00	90	37.21		83.3191	90.087	94.9091		36.9504	36.9183	37.35
859	2017-09-29	21:00:00	88	37.21		83.1915	90.6087	85		36.9504	36.9371	37.415
860	2017-09-29	21:30:00	85	37.1		83.1489	91.0435	86.1818		36.9458	36.9558	37.425
861	2017-09-29	22:00:00	88	37.12		83.2128	36.9942	90.8182		36.9462	36.9942	37.3708
862	2017-09-29	22:30:00	86	37.1		83.1489	37.0317	37.315		36.944	37.0317	37.315
863	2017-09-29	23:00:00	92	37.1		83.2766	37.0413	37.2683		36.944	37.0413	37.2683
864	2017-09-29	23:30:00	97	37.1		83.617	90.6522	88.5455		36.9465	37.0508	37.25
865	2017-09-30	00:00:00	89	36.98		83.7447	92.3478	88.5833		36.944	37.06	37.2308
866	2017-09-30	00:30:00	62	36.87		83.2128	92.0435	86.3333		36.9369	37.1454	37.165
867	2017-09-30	01:00:00	87	36.76		83.7234	37.1592	85.9167		36.9275	37.1592	37.0992
868	2017-09-30	01:30:00	80	36.87		83.5319	37.1638	37.0617		36.9204	37.1638	37.0617
869	2017-09-30	02:00:00	97	36.98		83.9362	37.1683	37.0333		36.9179	37.1683	37.0333
870	2017-09-30	02:30:00	65	36.98		83.5319	89.5652	84.6667		36.9154	37.1821	37.0142
871	2017-09-30	03:00:00	82	36.98		83.5106	84.5652	84.1667		36.9154	37.205	36.995
872	2017-09-30	03:30:00	61	36.98		83.4043	84.087	82.1667		36.9154	37.205	36.985
873	2017-09-30	04:00:00	76	36.87		83.8511	37.1675	81.1667		36.9131	37.1675	36.9642
874	2017-09-30	04:30:00	55	36.76		83.2766	37.1254	36.9358		36.909	37.1254	36.9358
875	2017-09-30	05:00:00		36.43		83.3913	37.0742	36.88		36.909	37.0742	36.88
876	2017-09-30	05:30:00	96	36.54		83.4565	82.9091	77.2727		36.9073	37.0417	36.8333
877	2017-09-30	06:00:00	174	36.4		86.8261	86.8696	85		36.9044	37.0079	36.785
878	2017-09-30	06:30:00	52	36.65		86.9348	85.2609	84.0909		36.8975	36.9658	36.7667
879	2017-09-30	07:00:00	63	36.65		86.3696	36.9283	81.9091		36.8929	36.9283	36.7575
880	2017-09-30	07:30:00	86	36.87		86.6087	36.9096	36.7575		36.8929	36.9096	36.7575
881	2017-09-30	08:00:00	92	36.54		86.4783	36.8771	36.7208		36.8883	36.8771	36.7208
882	2017-09-30	08:30:00	101	36.65		87.5217	84.9565	85.2727		36.886	36.8537	36.6933
883	2017-09-30	09:00:00	56	36.98		87.087	83.5652	82.9091		36.8906	36.8442	36.6933
884	2017-09-30	09:30:00	42	36.87		86.3696	81.6957	81.1818		36.8952	36.8346	36.6842
885	2017-09-30	10:00:00	72	36.76		86.7826	36.8196	80.8182		36.9069	36.8196	36.675
886	2017-09-30	10:30:00	44	36.76		85.7174	36.8054	36.675		36.9185	36.8054	36.675
887	2017-09-30	11:00:00	51	36.65		84.0217	36.7867	36.6933		36.914	36.7867	36.6933
888	2017-09-30	11:30:00		36.65		83.7333	76.5	75.7273		36.9094	36.7679	36.7025
889	2017-09-30	12:00:00	102	36.87		84.8889	77.0909	69.1818		36.9117	36.7633	36.7417
890	2017-09-30	12:30:00	79	36.98		85.1111	77.8636	71.6364		36.9567	36.7679	36.7692
891	2017-09-30	13:00:00	55	36.87		85.1111	36.7725	70.9091		36.9658	36.7725	36.7875
892	2017-09-30	13:30:00	70	36.54		84.3556	36.7587	36.76		36.9612	36.7587	36.76
893	2017-09-30	14:00:00	105	36.98		85.6889	36.7587	36.7967		36.9635	36.7587	36.7967
894	2017-09-30	14:30:00	153	37.21		85.0444	80.3182	75.3636		36.9752	36.7683	36.8433
895	2017-09-30	15:00:00	78	37.32		82.4	80.1364	77.3636		36.9937	36.7825	36.8717
896	2017-09-30	15:30:00	120	37.21		83.4667	82.8182	84.4545		36.9985	36.7921	36.9
897	2017-09-30	16:00:00	90	36.43		84.6444	36.7737	86.0909		36.9706	36.7737	36.8725
898	2017-09-30	16:30:00	83	37.66		84.3333	36.8113	36.9475		36.9683	36.8113	36.9475
899	2017-09-30	17:00:00	83	37.55		83.8444	36.8579	37.0225		36.966	36.8579	37.0225
900	2017-09-30	17:30:00	85	37.55		83.5556	84.1739	91.9167		36.9708	36.9	37.0975
901	2017-09-30	18:00:00	131	37.43		84.587	82.3043	94.3333		36.9754	36.9429	37.1442
902	2017-09-30	18:30:00	81	37.29		84.413	83.5652	94.5		36.9677	36.9696	37.17
903	2017-09-30	19:00:00	89	37.24		84.3478	36.9942	97.3333		36.9612	36.9942	37.2008
904	2017-09-30	19:30:00	90	37.21		84.413	84.8696	99		36.959	37.0083	37.2567
905	2017-09-30	20:00:00	105	37.1		84.9565	85.4348	99		36.9544	37.0317	37.2667
906	2017-09-30	20:30:00	86	37.1		84.8696	84.7826	93.4167		36.9521	37.0504	37.2575
907	2017-09-30	21:00:00	105	37.1		85.2391	37.0554	95.6667		36.9498	37.0554	37.2392
908	2017-09-30	21:30:00	85	37.1		85.2391	88.7826	92.75		36.9498	37.065	37.23
909	2017-09-30	22:00:00	79	36.98		85.0435	89.087	91.8333		36.9469	37.0742	37.2758
910	2017-09-30	22:30:00	85	36.98		85.0217	90.8696	92		36.9444	37.0833	37.2192
911	2017-09-30	23:00:00	78	36.98		84.7174	37.0971	91.5833		36.9419	37.0971	37.1717
912	2017-09-30	23:30:00	85	36.87		84.4565	91.75	91.5833		36.9371	37.1063	37.115
913	2017-10-01	00:00:00	100	36.84		84.6957	91.6667	89		36.9342	37.105	37.0658
914	2017-10-01	00:30:00	87	36.98		85.2391	92	89.5		36.9365	37.105	37.04
915	2017-10-01	01:00:00	92	36.98		85.3478	37.1096	89.75		36.941	37.1096	37.0183
916	2017-10-01	01:30:00	84	36.98		85.4348	94.125	89.25		36.9433	37.1279	36.9992
917	2017-10-01	02:00:00	101	36.87		85.5217	93.9583	88.9167		36.941	37.1233	36.98
918	2017-10-01	02:30:00	80	36.87		85.8478	90.9167	88.4167		36.9387	37.1092	36.9608
919	2017-10-01	03:00:00	79	36.65		85.7826	37.0813	86.25		36.9319	37.0813	36.9233
920	2017-10-01	03:30:00	86	36.87		86.3261	89.5417	86.3333		36.9296	37.0671	36.9042
921	2017-10-01	04:00:00	101	36.98		86.8696	90	88.1667		36.9319	37.09	36.9042
922	2017-10-01	04:30:00	90	37.07		87.6304	90.2917	88.5833		36.9383	37.0654	36.9117
923	2017-10-01	05:00:00	85	36.98		87.5745	37.0417	89.1667		36.9498	37.0417	36.9117
924	2017-10-01	05:30:00	84	37.1		87.3191	90.3333	89.0833		36.9615	37.0229	36.9308
925	2017-10-01	06:00:00	75	37.01		85.2128	88	87		36.9742	37.0054	36.945
926	2017-10-01	06:30:00	89	36.65		86	88.3333	87.1667		36.9742	36.9788	36.9175
927	2017-10-01	07:00:00	76	36.87		86.2766	87.7917	85.8333		36.9787	36.9633	36.9083
928	2017-10-01	07:30:00		37.1		86.2826	87.6957	86		36.9835	36.9588	36.9183
929	2017-10-01	08:00:00	62	36.76		85.6304	36.9446	82.4545		36.9881	36.9446	36.9092
930	2017-10-01	08:30:00		36.65		85.2889	85.8182	82.7		36.9881	36.9258	36.8908
931	2017-10-01	09:00:00	86	36.76		85.9556	84.9545	83.4		36.9835	36.9117	36.9
932	2017-10-01	09:30:00	52	36.98		86.1778	83.4545	80		36.9858	36.9067	36.9092
933	2017-10-01	10:00:00	70	36.76		86.1333	36.8975	76.9		36.9858	36.8975	36.8908
934	2017-10-01	10:30:00	77	36.68		86.8667	82.6818	75.6		36.9842	36.885	36.8583
935	2017-10-01	11:00:00	71	36.43		87.3111	82.3636	74.2		36.9796	36.8621	36.8125
936	2017-10-01	11:30:00	117	36.76		87.9565	83.8182	77.5		36.9819	36.8575	36.7842
937	2017-10-01	12:00:00	174	36.65		89.5217	36.8496	87.4		36.9773	36.8496	36.7542
938	2017-10-01	12:30:00	88	36.87		89.7174	87.2273	87.3		36.975	36.845	36.7725
939	2017-10-01	13:00:00	52	37.32		89.6522	85.4091	84.9		36.9844	36.8592	36.81
940	2017-10-01	13:30:00	83	37.43		89.9348	85.3636	84.7273		37.0029	36.8779	36.8375
941	2017-10-01	14:00:00	91	37.1		89.6304	84.9091	87.3636		37.0054	36.8875	36.8658
942	2017-10-01	14:30:00	102	37.32		88.5217	85.9091	88.5833		37.0077	36.9062	36.9217
943	2017-10-01	15:00:00	96	37.21		88.913	86.6818	89.4167		37.0054	36.9296	36.9592
944	2017-10-01	15:30:00	94	37.29		88.3478	36.9471	92.9167		37.0071	36.9471	36.985
945	2017-10-01	16:00:00		36.43		88.3111	86.381	95		37.0071	36.9242	36.9575
946	2017-10-01	16:30:00	81	37.55		88.2667	85.9524	95.3636		37.0048	36.9442	37.03
947	2017-10-01	17:00:00	93	37.55		88.4889	86.3333	97.3636		37.0048	36.9679	37.1233
948	2017-10-01	17:30:00	96	37.66		88.7333	36.9912	95.4545		37.0071	36.9912	37.1983
949	2017-10-01	18:00:00		37.66		87.7727	87.5	87.6		37.0119	37.0183	37.2825
950	2017-10-01	18:30:00	81	37.55		87.7727	87.1	86.9		37.0173	37.0558	37.3392
951	2017-10-01	19:00:00	85	37.32		87.6818	87.55	90.2		37.019	37.0746	37.3392
952	2017-10-01	19:30:00	85	37.32		87.5682	37.0837	90.4		37.0213	37.0837	37.33
953	2017-10-01	20:00:00	100	37.21		87.4545	89.2381	91.3		37.0235	37.1025	37.3392
954	2017-10-01	20:30:00	104	37.21		87.8636	89.9091	91.5		37.0258	37.1258	37.33
955	2017-10-01	21:00:00	86	37.21		87.4318	89.9091	90.5		37.0281	37.1446	37.33
956	2017-10-01	21:30:00	87	37.24		87.4773	37.1554	89.8		37.031	37.1554	37.3258
957	2017-10-01	22:00:00	86	37.43		87.6364	92.2273	89.4545		37.0404	37.1833	37.4092
958	2017-10-01	22:30:00	108	37.21		88.1591	93.6364	91.9091		37.0452	37.2054	37.3808
959	2017-10-01	23:00:00	89	36.98		88.4091	94.4545	91.5455		37.0452	37.2283	37.3333
960	2017-10-01	23:30:00	100	37.29		88.75	37.2504	91.9091		37.054	37.2504	37.3025
961	2017-10-02	00:00:00	84	36.98		88.3864	89.5909	91.25		37.0569	37.2642	37.2458
962	2017-10-02	00:30:00	92	37.21		88.5	89.7727	92.1667		37.0617	37.2783	37.2175
963	2017-10-02	01:00:00	86	37.21		88.3636	91.3182	92.25		37.0665	37.2737	37.2083
964	2017-10-02	01:30:00	86	37.21		88.4091	37.2646	92.3333		37.0713	37.2646	37.1992
965	2017-10-02	02:00:00	81	37.1		87.9545	91	90.75		37.076	37.2646	37.19
966	2017-10-02	02:30:00	84	37.1		88.0455	90.1818	89.0833		37.0808	37.2554	37.1808
967	2017-10-02	03:00:00	81	37.1		88.0909	89.5	88.6667		37.0902	37.2508	37.1717
968	2017-10-02	03:30:00	83	37.1		88.0227	89	88.3333		37.095	37.2429	37.16
969	2017-10-02	04:00:00	78	36.98		87.5	88.5217	87.6667		37.095	37.2658	37.1225
970	2017-10-02	04:30:00	93	36.96		87.5682	37.2413	86.4167		37.0927	37.2413	37.1017
971	2017-10-02	05:00:00	81	36.87		87.4773	88.5217	85.75		37.0904	37.2129	37.0925
972	2017-10-02	05:30:00	80	36.76		87.3864	87.8261	84.0833		37.0833	37.1754	37.0483
973	2017-10-02	06:00:00	64	36.65		87.1364	86.8333	82.4167		37.0758	37.1333	37.0208
974	2017-10-02	06:30:00	78	36.65		86.8864	37.0958	81.25		37.0758	37.0958	36.9742
975	2017-10-02	07:00:00	67	36.87		86.6818	85.9583	79.6667		37.0758	37.0771	36.9458
976	2017-10-02	07:30:00	82	36.87		86.5778	85.8333	79.3333		37.071	37.0583	36.9175
977	2017-10-02	08:00:00	70	37.01		86.7556	84.5833	78.4167		37.0762	37.05	36.91
978	2017-10-02	08:30:00	63	36.98		86.2391	37.0404	76.6667		37.0831	37.0404	36.9
979	2017-10-02	09:00:00	52	36.87		85.5	81.4583	74.25		37.0854	37.0262	36.8808
980	2017-10-02	09:30:00	75	36.65		86	80.9583	73.5833		37.0785	37.0017	36.8433
981	2017-10-02	10:00:00	197	36.4		88.7609	85.5833	83.5		37.071	36.9588	36.795
982	2017-10-02	10:30:00	84	36.65		88.913	36.9354	82.75		37.0704	36.9354	36.7692
983	2017-10-02	11:00:00	96	36.65		89.4565	84.875	84		37.075	36.9217	36.7508
984	2017-10-02	11:30:00		37.43		88.8444	84.2174	84.3636		37.089	36.9275	36.8067
985	2017-10-02	12:00:00	92	37.21		87.0222	84.5652	86.9091		37.1006	36.9371	36.8533
986	2017-10-02	12:30:00	34	37.1		85.8222	36.9325	82.9091		37.1054	36.9325	36.8908
987	2017-10-02	13:00:00	64	36.76		86.0889	81.087	82.6364		37.0938	36.9137	36.8817
988	2017-10-02	13:30:00	86	36.76		86.1556	81.087	83		37.0798	36.895	36.8725
989	2017-10-02	14:00:00	79	36.09		85.8889	81	83.8182		37.0588	36.8529	36.7958
990	2017-10-02	14:30:00		36.65		85.5227	36.8342	85.9		37.0448	36.8342	36.7683
991	2017-10-02	15:00:00	87	36.96		85.3182	81.1364	89.4		37.0396	36.8283	36.7758
992	2017-10-02	15:30:00	83	36.59		85.0682	81.1364	90.2		37.025	36.8071	36.7708
993	2017-10-02	16:00:00	102	37.04		85.4444	82.2273	80.7		37.0377	36.8096	36.8242
994	2017-10-02	16:30:00	96	37.77		85.7778	82.3636	81.9		37.0423	36.8433	36.9175
995	2017-10-02	17:00:00	107	37.77		86.0889	83.5455	83		37.0469	36.8808	37.0108
996	2017-10-02	17:30:00		37.55		85.8636	36.9137	83		37.0446	36.9137	37.0208
997	2017-10-02	18:00:00	107	37.55		86.3333	85.7619	84.5		37.0423	36.9512	37.0492
998	2017-10-02	18:30:00	82	37.66		86.3556	85.9524	89.3		37.0446	36.9933	37.0958
999	2017-10-02	19:00:00	88	37.55		86.4222	86.9524	91.7		37.0494	37.0217	37.1617
1000	2017-10-02	19:30:00	86	37.32		86.4444	37.0404	91.7		37.0494	37.0404	37.2083
1001	2017-10-02	20:00:00	88	37.32		86.1778	88	92.6		37.0517	37.0533	37.3108
1002	2017-10-02	20:30:00	104	37.1		86.1778	89.9524	93.6364		37.0494	37.0583	37.3483
1003	2017-10-02	21:00:00	89	37.21		86.2444	91.7143	93.8182		37.0494	37.0725	37.3692
1004	2017-10-02	21:30:00	88	37.32		86.2667	37.1004	94.2727		37.051	37.1004	37.43
1005	2017-10-02	22:00:00		37.32		86.2727	87.1	93.5		37.0487	37.1388	37.4533
1006	2017-10-02	22:30:00		37.43		85.7674	87.2632	93.2222		37.0533	37.1713	37.425
1007	2017-10-02	23:00:00	80	37.35		85.5581	86.4211	90.2222		37.061	37.2004	37.39
1008	2017-10-02	23:30:00		37.43		85.2143	86.4211	90.2222		37.064	37.2004	37.38
1009	2017-10-03	00:00:00		37.43		85.2439	86.1111	88.125		37.0733	37.2096	37.37
1010	2017-10-03	00:30:00	87	36.87		85.122	89.0556	88.75		37.0662	37.2	37.3042
1011	2017-10-03	01:00:00	84	37.21		85.0732	37.2188	88.25		37.0662	37.2188	37.2758
1012	2017-10-03	01:30:00	87	36.87		85.0976	90.2222	88.375		37.0592	37.2233	37.2383
1013	2017-10-03	02:00:00	97	36.98		85.4878	91.2222	89.5		37.0567	37.2604	37.21
1014	2017-10-03	02:30:00	79	36.98		85.3659	90.5789	86.375		37.0542	37.2742	37.2
1015	2017-10-03	03:00:00	83	36.87		85.4146	37.2704	85.625		37.0494	37.2704	37.1717
1016	2017-10-03	03:30:00	74	36.87		85.1951	89.8947	83.875		37.0446	37.2821	37.1342
1017	2017-10-03	04:00:00		36.98		85.375	89.2222	83.875		37.0446	37.2796	37.1058
1018	2017-10-03	04:30:00		36.98		85.1795	88.8235	83.875		37.045	37.2467	37.0683
1019	2017-10-03	05:00:00	65	36.65		84.7692	37.2	82		37.0404	37.2	37.01
1020	2017-10-03	05:30:00	96	36.54		85.1795	86.8889	83.5556		37.0358	37.1579	36.9358
1021	2017-10-03	06:00:00	63	36.76		85.1538	84.4444	81.5		37.0381	37.125	36.88
1022	2017-10-03	06:30:00	82	36.76		85.2564	84.4444	81		37.0404	37.0875	36.8708
1023	2017-10-03	07:00:00	133	36.65		86.9487	37.05	85.9		37.0358	37.05	36.8242
1024	2017-10-03	07:30:00	85	36.98		87.0256	86.8889	85.7		37.0381	37.0358	36.8333
1025	2017-10-03	08:00:00		36.31		87.4737	86.8235	84.4444		37.0235	36.9937	36.7775
1026	2017-10-03	08:30:00	113	36.65		88.7895	87.3529	88.2222		37.0167	36.975	36.75
1027	2017-10-03	09:00:00	83	36.76		89.6053	36.9562	88.2222		37.0144	36.9562	36.7408
1028	2017-10-03	09:30:00	34	36.76		88.5263	83.8235	83.7778		37.0167	36.9329	36.7317
1029	2017-10-03	10:00:00	37	36.87		84.3158	81.2222	79.1		37.0265	36.9142	36.7225
1030	2017-10-03	10:30:00	37	36.87		83.0789	78.8947	75.2727		37.031	36.8908	36.7133
1031	2017-10-03	11:00:00		36.65		82.7297	36.8617	76.3		37.031	36.8617	36.7133
1032	2017-10-03	11:30:00	55	36.87		82	77.5789	72.2		37.0194	36.8383	36.7408
1033	2017-10-03	12:00:00		37.1		81.7297	77.5789	73.2222		37.0171	36.8246	36.7692
1034	2017-10-03	12:30:00	122	37.1		84.1081	79.4211	77.6667		37.0171	36.8342	36.7975
1035	2017-10-03	13:00:00	30	36.98		83.1892	76.5789	66.2222		37.0217	36.8246	36.825
1036	2017-10-03	13:30:00	52	36.98		82.2703	74.7368	62.5556		37.0262	36.8292	36.825
1037	2017-10-03	14:00:00	101	37.21		82.8649	36.8388	66.4		37.0496	36.8388	36.9
1038	2017-10-03	14:30:00	104	37.21		83.4211	76.2632	65.5		37.0612	36.8483	36.9467
1039	2017-10-03	15:00:00	102	36.76		83.8158	77.2632	67.4		37.0571	36.8438	36.9467
1040	2017-10-03	15:30:00		37.1		83.8378	77.4444	71.1111		37.0677	36.8533	36.975
1041	2017-10-03	16:00:00	150	37.1		85.1351	36.8583	83.6667		37.069	36.8583	36.9942
1042	2017-10-03	16:30:00	90	37.43		84.973	81.7	89.5556		37.0619	36.8771	37.0408
1043	2017-10-03	17:00:00	197	37.77		87.4054	88.3	100.3		37.0619	36.9238	37.1342
1044	2017-10-03	17:30:00	113	37.66		88.0789	89.15	106.1		37.0642	36.9704	37.2
1045	2017-10-03	18:00:00	102	37.89		87.9474	37.0175	105.727		37.0712	37.0175	37.2658
1046	2017-10-03	18:30:00	32	37.55		86.6316	88.6	97.5455		37.069	37.0504	37.3033
1047	2017-10-03	19:00:00	91	37.66		86.7105	86.5	103.091		37.0712	37.0925	37.36
1048	2017-10-03	19:30:00	156	37.43		88.5526	90.05	112.545		37.0735	37.1112	37.3975
1049	2017-10-03	20:00:00	96	37.55		88.7632	37.1629	112.091		37.0783	37.1629	37.4258
1050	2017-10-03	20:30:00	96	37.77		88.5526	89.5238	111.364		37.0923	37.2096	37.4725
1051	2017-10-03	21:00:00	94	37.89		88.6842	90.0476	110.636		37.1065	37.2567	37.5667
1052	2017-10-03	21:30:00	93	37.86		88.8158	92.8571	109.167		37.1177	37.3025	37.63
1053	2017-10-03	22:00:00		37.77		88.8158	37.34	105.455		37.1271	37.34	37.6858
1054	2017-10-03	22:30:00	75	37.55		88.4615	97.55	104.091		37.1296	37.3683	37.6958
1055	2017-10-03	23:00:00	93	37.57		88.7949	97.3333	94.6364		37.1342	37.4067	37.6792
1056	2017-10-03	23:30:00	105	37.77		89.2	99.7143	93.9091		37.1412	37.4442	37.6883
1057	2017-10-04	00:00:00	96	37.77		89.3659	37.4721	93.3636		37.1483	37.4721	37.6783
1058	2017-10-04	00:30:00	90	37.55		89.439	98.0909	98.6364		37.1625	37.4908	37.6783
1059	2017-10-04	01:00:00	90	37.55		89.5854	100.818	98.5455		37.1696	37.5146	37.6692
1060	2017-10-04	01:30:00	88	37.55		89.6098	102.455	92.3636		37.1837	37.5383	37.6792
1061	2017-10-04	02:00:00	107	37.55		89.8537	102.727	93.3636		37.1956	37.5525	37.6792
1062	2017-10-04	02:30:00	89	37.43		90.0976	102.045	92.7273		37.205	37.5617	37.6508
1063	2017-10-04	03:00:00	90	37.43		90.2683	37.5896	92.3636		37.2167	37.5896	37.6125
1064	2017-10-04	03:30:00	90	37.43		90.6585	101	92.0909		37.2283	37.6033	37.5767
1065	2017-10-04	04:00:00	92	37.55		90.6905	98.4783	92.0833		37.2402	37.6221	37.5583
1066	2017-10-04	04:30:00	87	37.1		90.6047	98.3478	93.0833		37.2427	37.6083	37.5208
1067	2017-10-04	05:00:00	78	37.1		90.907	37.5804	91.8333		37.2521	37.5804	37.4817
1068	2017-10-04	05:30:00		36.65		90.7857	92.2727	90.6364		37.2544	37.5383	37.3883
1069	2017-10-04	06:00:00	110	36.65		91.9048	92.6364	91.9091		37.2521	37.4867	37.295
1070	2017-10-04	06:30:00	97	37.1		92.2619	95.5909	92.5455		37.2592	37.4679	37.2575
1071	2017-10-04	07:00:00	84	37.32		91.0952	37.4537	92		37.2731	37.4537	37.2383
1072	2017-10-04	07:30:00	84	37.1		91.0714	92	91.6364		37.2756	37.44	37.2008
1073	2017-10-04	08:00:00	67	37.35		90.5116	90.6818	88		37.2973	37.4317	37.1842
1074	2017-10-04	08:30:00	85	37.55		89.8605	90.1818	87.6364		37.316	37.4225	37.1942
1075	2017-10-04	09:00:00	75	36.98		89.6744	89.3182	86.2727		37.3206	37.3846	37.1567
1076	2017-10-04	09:30:00	75	36.98		90.6279	88.5	84.9091		37.3252	37.3479	37.1192
1077	2017-10-04	10:00:00	102	37.55		92.1395	89.087	85.8182		37.3394	37.3388	37.1192
1078	2017-10-04	10:30:00	73	37.43		92.9767	37.3338	84.5455		37.351	37.3338	37.1467
1079	2017-10-04	11:00:00	187	36.87		95.1136	93.087	94.4545		37.3556	37.3046	37.1275
1080	2017-10-04	11:30:00	93	37.21		95.9773	92.5652	94.3333		37.3627	37.2812	37.1742
1081	2017-10-04	12:00:00	92	37.32		95.8889	92.3913	92.8333		37.3673	37.2625	37.23
1082	2017-10-04	12:30:00	83	37.43		95.0222	37.2575	91.6667		37.3742	37.2575	37.2575
1083	2017-10-04	13:00:00	22	37.43		94.8444	89.1304	86.5		37.3835	37.2525	37.2667
1084	2017-10-04	13:30:00	84	37.66		95.5556	88.9565	86.5		37.3977	37.2571	37.3133
1085	2017-10-04	14:00:00	82	37.66		95.1333	87.8696	87.75		37.4071	37.2617	37.3392
1086	2017-10-04	14:30:00	97	37.32		94.9778	37.2571	88.75		37.4094	37.2571	37.32
1087	2017-10-04	15:00:00	98	37.32		94.8889	88.5652	90.6667		37.421	37.2525	37.3483
1088	2017-10-04	15:30:00	68	37.55		94.3043	87.6087	90.0833		37.4304	37.2575	37.3958
1089	2017-10-04	16:00:00	66	37.32		92.4783	86.4783	87.0833		37.435	37.2479	37.3767
1090	2017-10-04	16:30:00	97	37.66		92.6304	37.2713	89.0833		37.4398	37.2713	37.3958
1091	2017-10-04	17:00:00	102	37.89		90.5652	87.9565	82		37.4423	37.3042	37.4808
1092	2017-10-04	17:30:00	57	37.66		89.3478	86.6667	79		37.4423	37.3462	37.5183
1093	2017-10-04	18:00:00	115	37.66		89.6304	86.875	80.9167		37.4375	37.3883	37.5467
1094	2017-10-04	18:30:00	97	37.66		91.0435	37.4117	82.0833		37.4398	37.4117	37.5658
1095	2017-10-04	19:00:00	87	37.66		90.9565	87	87.5		37.4398	37.4258	37.585
1096	2017-10-04	19:30:00		37.32		89.5111	87.1304	87.8182		37.4375	37.435	37.5567
1097	2017-10-04	20:00:00	138	37.86		90.4444	90.2174	92.9091		37.444	37.4562	37.5733
1098	2017-10-04	20:30:00	32	37.66		89.0222	37.4608	87		37.4417	37.4608	37.6017
1099	2017-10-04	21:00:00	92	37.89		88.9778	88.6522	86.4545		37.4417	37.4987	37.6492
1100	2017-10-04	21:30:00	92	37.77		88.9556	89.3913	88.6364		37.4398	37.5317	37.6675
1101	2017-10-04	22:00:00	89	37.43		88.9565	88.8261	90.7273		37.4327	37.5267	37.6767
1102	2017-10-04	22:30:00	91	37.21		89.3043	89.6087	90.1818		37.4256	37.5175	37.6392
1103	2017-10-04	23:00:00	89	37.1		89.2174	85.3478	89		37.4158	37.5271	37.5733
1104	2017-10-04	23:30:00	79	37.21		88.6522	37.5271	91		37.4042	37.5271	37.5358
1105	2017-10-05	00:00:00	91	37.21		88.5435	84.6957	88.8182		37.3925	37.5225	37.4983
1106	2017-10-05	00:30:00	93	37.43		88.6087	85.1304	88.4545		37.39	37.5225	37.4792
1107	2017-10-05	01:00:00	97	37.66		88.7609	88.3913	89.3636		37.3923	37.5321	37.4792
1108	2017-10-05	01:30:00	88	37.32		88.7609	37.5179	89.25		37.3875	37.5179	37.4792
1109	2017-10-05	02:00:00	84	37.21		88.2609	88.6522	84.75		37.3804	37.4992	37.425
1110	2017-10-05	02:30:00	91	36.98		88.3043	88.3913	89.6667		37.371	37.485	37.3683
1111	2017-10-05	03:00:00	68	37.1		87.8261	87.087	87.6667		37.3642	37.4758	37.3025
1112	2017-10-05	03:30:00	89	36.98		87.8043	37.4521	87.4167		37.3548	37.4521	37.2367
1113	2017-10-05	04:00:00	88	37.21		87.7174	88.9565	87.3333		37.3477	37.4475	37.2183
1114	2017-10-05	04:30:00		37.32		87.7333	88.5909	87		37.3523	37.4333	37.2275
1115	2017-10-05	05:00:00	80	37.43		87.7778	87.5909	86.1818		37.3592	37.4142	37.255
1116	2017-10-05	05:30:00	59	37.43		87.1522	37.4046	84.3636		37.3754	37.4046	37.2733
1117	2017-10-05	06:00:00	57	37.43		86	85.0455	81.2727		37.3917	37.395	37.2917
1118	2017-10-05	06:30:00	88	37.21		85.8043	84.6364	80.8182		37.394	37.3763	37.2733
1119	2017-10-05	07:00:00	51	36.98		85.087	83	76.6364		37.3869	37.3479	37.2167
1120	2017-10-05	07:30:00	90	36.65		85.2174	37.32	76.8182		37.3775	37.32	37.1608
1121	2017-10-05	08:00:00	62	36.65		85.1087	80	74.8182		37.3629	37.2696	37.1142
1122	2017-10-05	08:30:00	72	36.76		84.8261	81.7391	73.0909		37.3465	37.2321	37.0958
1123	2017-10-05	09:00:00	55	36.31		84.3913	80.1304	71.9091		37.3325	37.1662	37.03
1124	2017-10-05	09:30:00	77	36.54		84.4348	37.115	70.8182		37.3233	37.115	36.9933
1125	2017-10-05	10:00:00	60	36.76		83.5217	78.2174	68.2727		37.3069	37.0871	36.9558
1126	2017-10-05	10:30:00	68	36.76		83.413	77.2174	68.25		37.2929	37.0683	36.9092
1127	2017-10-05	11:00:00	170	36.87		83.0435	80.7391	75.75		37.2929	37.0587	36.8625
1128	2017-10-05	11:30:00	166	36.98		84.6304	84.5217	84.6667		37.2881	37.0492	36.825
1129	2017-10-05	12:00:00	23	37.1		83.1304	81.5652	81.8333		37.2835	37.0446	36.7975
1130	2017-10-05	12:30:00	26	36.76		81.8913	37.0167	76.6667		37.2696	37.0167	36.76
1131	2017-10-05	13:00:00	36	37.1		82.1957	76	75.4167		37.2627	36.9933	36.77
1132	2017-10-05	13:30:00	107	36.87		82.6957	76.8261	76.8333		37.2462	36.9746	36.7883
1133	2017-10-05	14:00:00	110	36.65		83.3043	77.9565	80.8333		37.2252	36.9512	36.7883
1134	2017-10-05	14:30:00	43	36.68		82.1304	36.9387	78.4167		37.2119	36.9387	36.7817
1135	2017-10-05	15:00:00		36.98		81.7778	76.2273	80.5455		37.2048	36.9337	36.8375
1136	2017-10-05	15:30:00	84	36.76		82.1333	76	81.1818		37.1883	36.9246	36.8558
1137	2017-10-05	16:00:00	96	36.87		82.8	76.3636	84.4545		37.179	36.9104	36.865
1138	2017-10-05	16:30:00		37.43		82.4773	36.915	86.1		37.1742	36.915	36.9208
1139	2017-10-05	17:00:00	108	37.55		82.6136	77.6364	79.9		37.1671	36.92	36.9775
1140	2017-10-05	17:30:00	69	37.29		82.8864	78.0909	70.2		37.1594	36.9142	37.0033
1141	2017-10-05	18:00:00	33	37.1		81.0227	77	71.2		37.1477	36.9004	37.0033
1142	2017-10-05	18:30:00	159	37.66		82.4318	80.2273	84.5		37.1477	36.9192	37.0783
1143	2017-10-05	19:00:00	102	38.11		82.7727	82.5455	91.1		37.1571	36.9662	37.1625
1144	2017-10-05	19:30:00	89	37.89		82.9111	82.5	89.3		37.169	37.0179	37.2475
1145	2017-10-05	20:00:00	107	37.1		82.2222	37.0367	89		37.1531	37.0367	37.285
1146	2017-10-05	20:30:00		37.43		83.3636	85.1429	94.1111		37.1483	37.0646	37.3475
1147	2017-10-05	21:00:00	91	37.04		83.3409	86.8571	93.8		37.1306	37.095	37.3525
1148	2017-10-05	21:30:00	163	37.1		84.9545	90.9524	101.7		37.1167	37.1183	37.3808
1149	2017-10-05	22:00:00		37.1		84.8605	37.1325	102.333		37.1098	37.1325	37.4
1150	2017-10-05	22:30:00		36.98		84.7143	93.7895	102.333		37.105	37.1417	37.3625
1151	2017-10-05	23:00:00	87	36.98		84.6667	89.4211	100		37.1025	37.1463	37.315
1152	2017-10-05	23:30:00	83	36.87		84.7619	85.0526	101.556		37.0954	37.1417	37.28
1153	2017-10-06	00:00:00	86	37.1		84.6429	37.1417	107.444		37.0931	37.1417	37.28
1154	2017-10-06	00:30:00	91	37.21		84.5952	91.7895	99.8889		37.0885	37.1604	37.2425
1155	2017-10-06	01:00:00	89	37.21		84.4048	94.5789	98.4444		37.0792	37.165	37.1675
1156	2017-10-06	01:30:00		37.21		84.3171	93.8889	99.625		37.0769	37.1792	37.1108
1157	2017-10-06	02:00:00	87	36.98		84.3902	37.1929	97.125		37.0721	37.1929	37.1008
1158	2017-10-06	02:30:00	68	36.76		83.8293	94	93.8889		37.0675	37.1963	37.045
1159	2017-10-06	03:00:00	81	36.76		84.1463	93.3158	92.7778		37.0604	37.1871	37.0217
1160	2017-10-06	03:30:00	79	36.65		83.9024	93.0526	83.4444		37.0535	37.1825	36.9842
1161	2017-10-06	04:00:00	70	36.65		83.4634	37.1733	82.1		37.0419	37.1733	36.9467
1162	2017-10-06	04:30:00	82	36.65		83.4286	91.2	82.0909		37.0279	37.1408	36.9192
1163	2017-10-06	05:00:00	75	36.65		83.3095	89.55	81		37.0117	37.1033	36.8917
1164	2017-10-06	05:30:00	78	36.76		83.7619	90	80.5455		36.9977	37.0813	36.8825
1165	2017-10-06	06:00:00	77	36.76		84.2381	37.0671	79.7273		36.9838	37.0671	36.8542
1166	2017-10-06	06:30:00	39	36.65		83.0714	86.2	75		36.9721	37.025	36.8075
1167	2017-10-06	07:00:00	34	35.98		82.6667	82.8	70		36.9513	36.9362	36.705
1168	2017-10-06	07:30:00	69	36.54		82.1667	81.8	69.9167		36.949	36.88	36.6492
1169	2017-10-06	08:00:00		36.34		82.6585	80.4737	68.3636		36.9425	36.8483	36.5958
1170	2017-10-06	08:30:00	66	36.31		82.5122	79.75	68.1818		36.9331	36.8017	36.5583
1171	2017-10-06	09:00:00		36.31		83.2	36.7712	66.9		36.9331	36.7712	36.5208
1172	2017-10-06	09:30:00	43	36.65		82.35	72.8421	63.3		36.9354	36.7525	36.5208
1173	2017-10-06	10:00:00	115	36.43		83.725	74.95	67.8		36.9285	36.7246	36.5025
1174	2017-10-06	10:30:00	58	36.09		83.475	74.1429	65.4		36.9146	36.6875	36.4558
1175	2017-10-06	11:00:00	59	36.65		80.7	36.6737	63.8		36.91	36.6737	36.4558
1176	2017-10-06	11:30:00	62	36.98		78.1	71.8095	62.2		36.91	36.6783	36.4742
1177	2017-10-06	12:00:00	98	37.04		79.975	72.381	64.3		36.9088	36.6758	36.4975
1178	2017-10-06	12:30:00	36	36.98		80.225	69.7619	64		36.9133	36.6662	36.525
1179	2017-10-06	13:00:00	75	36.76		81.2	36.6475	68.1		36.9063	36.6475	36.59
1180	2017-10-06	13:30:00	48	36.43		79.725	68.1364	66		36.8971	36.615	36.5808
1181	2017-10-06	14:00:00	43	36.76		78.05	66.1364	63.9091		36.8994	36.6058	36.6158
1182	2017-10-06	14:30:00	174	36.76		81.325	70.9545	73.7273		36.901	36.6058	36.6533
1183	2017-10-06	15:00:00		36.93		81.325	36.6129	73.7273		36.9	36.6129	36.705
1184	2017-10-06	15:30:00		36.76		81.2564	70.05	76.8		36.9	36.6175	36.7142
1185	2017-10-06	16:00:00	47	36.76		80	68.9	70		36.8977	36.6221	36.7417
1186	2017-10-06	16:30:00	147	37.1		81.675	72.15	78.9		36.8908	36.6408	36.8258
1187	2017-10-06	17:00:00	36	37.32		79.875	36.6687	76.6		36.886	36.6687	36.8817
1188	2017-10-06	17:30:00		37.32		80.1538	69.7895	78.2222		36.8867	36.6921	36.91
1189	2017-10-06	18:00:00	84	37.41		81.4615	70.1579	76.6667		36.8931	36.7192	36.9408
1190	2017-10-06	18:30:00	108	37.66		80.1538	73.7895	84.6667		36.8931	36.7613	36.9975
1191	2017-10-06	19:00:00		37.32		79.5789	36.8171	85.875		36.8767	36.8171	37.0442
1192	2017-10-06	19:30:00	89	36.98		79.5789	77.1111	91		36.8577	36.8354	37.09
1193	2017-10-06	20:00:00	91	37.21		79.1579	77.8421	97		36.86	36.8717	37.1275
1194	2017-10-06	20:30:00	89	37.21		79.4103	79.0526	86.375		36.8554	36.9092	37.165
1195	2017-10-06	21:00:00	117	37.1		80.0769	80.95	89.7778		36.8567	36.9421	37.1792
1196	2017-10-06	21:30:00	89	37.1		78.1795	83.25	89.7		36.8567	36.9608	37.2075
1197	2017-10-06	22:00:00	89	37.04		78.45	36.9863	93.9		36.8554	36.9863	37.2308
1198	2017-10-06	22:30:00		36.76		78.45	83.2105	88		36.8508	37.0142	37.2025
1199	2017-10-06	23:00:00	75	36.76		78.15	84.0526	92.3333		36.8462	37.0188	37.1558
1200	2017-10-06	23:30:00	74	36.68		77.925	84.6842	90.5		36.8423	37.0063	37.1025
1201	2017-10-07	00:00:00		36.65		77.7179	36.99	91.2222		36.8329	36.99	37.0392
1202	2017-10-07	00:30:00		36.48		77.3684	86.7647	89.125		36.8177	36.9692	36.9408
1203	2017-10-07	01:00:00	84	36.43		77.2368	87.2941	88.5556		36.8015	36.9554	36.8667
1204	2017-10-07	01:30:00	77	36.76		77.2308	89	87.2222		36.7921	36.9692	36.8483
1205	2017-10-07	02:00:00	78	36.76		77	36.9692	85.7778		36.7875	36.9692	36.8108
1206	2017-10-07	02:30:00	88	36.87		77.5128	86	85.6667		36.7898	36.9737	36.7825
1207	2017-10-07	03:00:00	78	36.98		77.4359	85.5556	81.3333		36.7944	36.9758	36.7725
1208	2017-10-07	03:30:00	80	37.1		77.4615	85.2632	80.3333		36.8038	36.99	36.7725
1209	2017-10-07	04:00:00		37.1		77.6579	87.3889	79.25		36.8131	37.0042	36.7775
1210	2017-10-07	04:30:00	70	37.1		77.3421	83.1111	78.2222		36.8225	37.0042	36.8058
1211	2017-10-07	05:00:00	75	36.87		77.3421	85.2778	78.2222		36.8271	36.9854	36.815
1212	2017-10-07	05:30:00		36.76		77.3243	36.9621	78.75		36.8271	36.9621	36.8217
1213	2017-10-07	06:00:00	30	36.09		76.0541	82.2778	73.3333		36.8131	36.9071	36.775
1214	2017-10-07	06:30:00	37	36.2		76	78.3333	69.7		36.8037	36.8463	36.7517
1215	2017-10-07	07:00:00	81	36.31		77.2703	78.4737	69.4		36.8106	36.8042	36.7417
1216	2017-10-07	07:30:00	51	36.76		76.7838	36.795	66.8		36.8152	36.795	36.7417
1217	2017-10-07	08:00:00	86	36.54		77.0263	76.2105	67.6		36.8194	36.7671	36.7233
1218	2017-10-07	08:30:00	72	36.54		77.1842	75.3158	66		36.8242	36.7392	36.6958
1219	2017-10-07	09:00:00	55	36.65		76.6154	72.0526	63.7		36.8312	36.7204	36.6683
1220	2017-10-07	09:30:00	74	36.43		77.4103	36.6925	63.1		36.8267	36.6925	36.6125
1221	2017-10-07	10:00:00	51	36.43		75.7692	69.2632	62		36.8267	36.6671	36.5567
1222	2017-10-07	10:30:00	92	36.43		76.641	70.4	64		36.8337	36.6533	36.5008
1223	2017-10-07	11:00:00	131	36.59		78.4872	73.2	69.0909		36.8325	36.6462	36.4775
1224	2017-10-07	11:30:00		36.76		78.9211	36.6496	69.0909		36.8279	36.6496	36.4775
1225	2017-10-07	12:00:00	63	36.54		78	72.65	72.0909		36.8175	36.645	36.515
1226	2017-10-07	12:30:00	28	35.87		77.7895	70.5238	71.2727		36.7944	36.6196	36.4875
1227	2017-10-07	13:00:00	79	36.2		77.8947	70.2857	71.0909		36.7827	36.61	36.4783
1228	2017-10-07	13:30:00	43	36.65		77.7632	36.6054	70.3636		36.7873	36.6054	36.4692
1229	2017-10-07	14:00:00	22	36.87		77.2105	66	64.5455		36.7896	36.61	36.4967
1230	2017-10-07	14:30:00	34	36.87		73.5263	63.4286	61.0909		36.7919	36.61	36.5242
1231	2017-10-07	15:00:00	23	36.2		72.2308	60.8095	58.1818		36.7767	36.5775	36.4867
1232	2017-10-07	15:30:00	144	34.22		74.025	36.4575	64.5455		36.7238	36.4575	36.3025
1233	2017-10-07	16:00:00	150	36.2		76.6	67.7727	73.5455		36.7121	36.42	36.2833
1234	2017-10-07	16:30:00	94	37.01		75.275	68.8636	73.7273		36.7102	36.4163	36.3317
1235	2017-10-07	17:00:00	153	37.55		78.2	72.4091	75.7273		36.715	36.4446	36.4117
1236	2017-10-07	17:30:00		37.43		78.2	72.4091	75.7273		36.7173	36.4725	36.4675
1237	2017-10-07	18:00:00	122	37.43		79.15	76.5909	81.0909		36.7177	36.5283	36.5417
1238	2017-10-07	18:30:00	94	37.89		78.8	36.5987	87.0909		36.7225	36.5987	36.71
1239	2017-10-07	19:00:00	100	37.77		79.3171	80.0455	89		36.7319	36.6596	36.8408
1240	2017-10-07	19:30:00	93	36.98		79.4146	81.9545	93.5455		36.7319	36.6687	36.8683
1241	2017-10-07	20:00:00	90	37.55		79.3902	82.1364	99.7273		36.739	36.7108	36.925
1242	2017-10-07	20:30:00	87	37.55		79.3415	36.7529	104.545		36.746	36.7529	36.9817
1243	2017-10-07	21:00:00	81	37.55		78.4634	84	109.818		36.7554	36.7904	37.0942
1244	2017-10-07	21:30:00	88	37.55		78.439	84.6364	104.727		36.7648	36.8371	37.3717
1245	2017-10-07	22:00:00	105	37.21		78.8293	87.0909	100.636		36.7683	36.8696	37.4558
1246	2017-10-07	22:30:00	90	36.65		79.0952	36.8787	100.273		36.766	36.8787	37.4258
1247	2017-10-07	23:00:00	91	37.21		79.4762	85.1818	94.6364		36.7754	36.9046	37.3975
1248	2017-10-07	23:30:00	87	37.32		79.7857	85.2609	94		36.7888	36.9279	37.3883
1249	2017-10-08	00:00:00	93	37.43		80.093	86.5652	91.5833		36.805	36.965	37.3883
1250	2017-10-08	00:30:00	90	36.87		80.3182	37.0067	91.25		36.8131	37.0067	37.3033
1251	2017-10-08	01:00:00	88	37.21		80.4091	89.6522	90.25		36.8294	37.0487	37.2567
1252	2017-10-08	01:30:00	84	36.76		80.5682	91.4348	89.5		36.8294	37.0533	37.2383
1253	2017-10-08	02:00:00	83	36.98		80.6818	94.087	88.9167		36.834	37.0579	37.1908
1254	2017-10-08	02:30:00		36.76		80.5116	37.0533	89.0909		36.8317	37.0533	37.125
1255	2017-10-08	03:00:00	76	36.65		80.4651	99.2273	88.6364		36.8248	37.0721	37.05
1256	2017-10-08	03:30:00	80	36.87		80.4651	96.3182	87.9091		36.82	37.1825	36.9933
1257	2017-10-08	04:00:00	75	36.2		80.3409	92.9091	85.1818		36.8013	37.1825	36.9092
1258	2017-10-08	04:30:00	80	36.43		80.5682	37.1583	84.2727		36.7873	37.1583	36.8908
1259	2017-10-08	05:00:00	72	36.31		80.5	88.5909	82.5455		36.7756	37.1067	36.8158
1260	2017-10-08	05:30:00	75	36.87		80.3778	88	81.4545		36.7779	37.0833	36.7783
1261	2017-10-08	06:00:00	77	36.65		81.4222	86.0435	80		36.7896	37.0508	36.7133
1262	2017-10-08	06:30:00	70	36.82		82.1556	85	78.1818		36.8025	37.0063	36.7092
1263	2017-10-08	07:00:00	59	36.82		81.6667	83.2174	75.5455		36.8131	36.9667	36.6767
1264	2017-10-08	07:30:00		36.76		82.3636	36.9575	74.7		36.8131	36.9575	36.6767
1265	2017-10-08	08:00:00		36.65		82.2791	82.4286	73.7778		36.8154	36.92	36.6492
1266	2017-10-08	08:30:00	147	36.87		84.0233	85.2857	81.1		36.8223	36.8917	36.6583
1267	2017-10-08	09:00:00	30	36.76		83.4419	82.8571	76.5		36.8246	36.8587	36.6675
1268	2017-10-08	09:30:00	71	36.65		83.3721	36.8212	75.6		36.8292	36.8212	36.6492
1269	2017-10-08	10:00:00	88	36.65		84.2326	81.2381	76.9		36.8337	36.7979	36.6867
1270	2017-10-08	10:30:00	141	36.98		85.3721	83.6667	83		36.8452	36.8117	36.7325
1271	2017-10-08	11:00:00		35.98		84.2857	83.3	84.2222		36.8325	36.7604	36.705
1272	2017-10-08	11:30:00	31	36.2		83.0465	36.7137	79.3333		36.8208	36.7137	36.6492
1273	2017-10-08	12:00:00		36.87		83.5238	79.8421	79.625		36.8277	36.6904	36.6675
1274	2017-10-08	12:30:00	133	36.87		86.0238	82.1053	87.5		36.8485	36.6904	36.6717
1275	2017-10-08	13:00:00	102	36.87		86.5714	82.8421	92.875		36.8625	36.6763	36.6758
1276	2017-10-08	13:30:00		37.21		87.6341	82.7778	92.875		36.8742	36.695	36.7133
1277	2017-10-08	14:00:00	113	37.74		89.8537	84.4444	95.1111		36.8923	36.7267	36.8042
1278	2017-10-08	14:30:00	56	36.76		90.3902	82.9474	85		36.89	36.7267	36.795
1279	2017-10-08	15:00:00	77	36.98		91.7073	36.7404	90.2222		36.9062	36.7404	36.8133
1280	2017-10-08	15:30:00	187	37.1		92.7561	88.6316	103.111		36.9662	36.75	36.8508
1281	2017-10-08	16:00:00	52	36.26		90.3659	87.4211	99.1111		36.9675	36.7525	36.8183
1282	2017-10-08	16:30:00	91	37.43		90.2927	88	93.5556		36.9762	36.7942	36.8558
1283	2017-10-08	17:00:00		37.55		88.725	36.8458	93.5556		36.9763	36.8458	36.9867
1284	2017-10-08	17:30:00	98	37.66		88.9512	90.1667	101		36.981	36.8787	37.1083
1285	2017-10-08	18:00:00		37.89		88.125	90.9412	101		36.9906	36.9304	37.1933
1286	2017-10-08	18:30:00		37.89		87.9744	92.25	97		36.9906	36.975	37.2783
1287	2017-10-08	19:00:00	101	37.66		88	37.01	96.875		36.9883	37.01	37.3442
1288	2017-10-08	19:30:00	107	37.63		88.359	95.5882	98		37.0019	37.0462	37.3792
1289	2017-10-08	20:00:00		37.77		88.3158	95.5882	96.125		37.0065	37.0929	37.3817
1290	2017-10-08	20:30:00	94	37.66		88.5	92.4706	100.875		37.0088	37.1258	37.4567
1291	2017-10-08	21:00:00	166	37.66		90.7368	37.1633	112		37.011	37.1633	37.5133
1292	2017-10-08	21:30:00	88	37.26		90.7368	101.471	99.625		37.005	37.1887	37.5267
1293	2017-10-08	22:00:00	96	37.66		90.5	101.941	105.125		37.0144	37.2308	37.6433
1294	2017-10-08	22:30:00	97	37.55		90.6842	99.3529	105.875		37.0331	37.2546	37.6533
1295	2017-10-08	23:00:00	96	37.77		90.8158	37.3292	104.778		37.0448	37.3292	37.6717
1296	2017-10-08	23:30:00	86	37.66		90.7895	102.222	103.444		37.0519	37.39	37.6717
1297	2017-10-09	00:00:00	101	37.66		91	102.158	103.2		37.0567	37.4229	37.6525
1298	2017-10-09	00:30:00	87	37.55		90.9211	99.7368	101.727		37.0708	37.4512	37.6242
1299	2017-10-09	01:00:00		37.04		91	37.4583	101.8		37.0673	37.4583	37.5725
1300	2017-10-09	01:30:00	144	37.43		92.6216	101.947	105.5		37.0813	37.4675	37.5558
1301	2017-10-09	02:00:00	94	37.32		92.9189	100.947	104.455		37.0883	37.45	37.5183
1302	2017-10-09	02:30:00	93	37.43		92.9211	102.895	104.364		37.1023	37.4779	37.4992
1303	2017-10-09	03:00:00	88	37.32		93.2368	103.474	97.2727		37.1163	37.4921	37.4708
1304	2017-10-09	03:30:00	84	36.98		93.3421	98.0526	96.9091		37.1185	37.4871	37.4475
1305	2017-10-09	04:00:00	89	36.87		93.7105	37.5125	96.2727		37.1325	37.5125	37.3817
1306	2017-10-09	04:30:00	144	37.21		95.3947	102.789	100.545		37.1488	37.5033	37.3533
1307	2017-10-09	05:00:00	87	37.32		95.7895	102	99.7273		37.1698	37.4937	37.3158
1308	2017-10-09	05:30:00	84	37.32		96.0263	101.3	99.5455		37.1792	37.4796	37.2875
1309	2017-10-09	06:00:00	80	37.1		96.1053	37.4467	97.6364		37.1885	37.4467	37.2408
1310	2017-10-09	06:30:00	79	37.32		96.3421	99.3182	96.9091		37.199	37.4229	37.2217
1311	2017-10-09	07:00:00	80	36.98		96.8947	98.3636	95.5		37.2023	37.3946	37.2167
1312	2017-10-09	07:30:00		35.65		96.8947	97.9524	91.0909		37.1792	37.3121	37.0683
1313	2017-10-09	08:00:00		36.43		96.8947	37.2563	90.8		37.1746	37.2563	36.9942
1314	2017-10-09	08:30:00	27	37.1		93.7368	94.7619	84.2		37.1794	37.2329	36.9667
1315	2017-10-09	09:00:00		36.76		95.4595	91.2	83.7778		37.1794	37.1954	36.92
1316	2017-10-09	09:30:00	38	36.87		94.5676	88.7	78.6667		37.184	37.1792	36.9108
1317	2017-10-09	10:00:00	127	35.87		95.6216	37.1046	82.8889		37.1677	37.1046	36.8275
1318	2017-10-09	10:30:00	166	33.57		96.2973	93.7	85.3333		37.0967	36.9388	36.5242
1319	2017-10-09	11:00:00	73	36.43		95.6842	92.55	83.7778		37.106	36.8829	36.45
1320	2017-10-09	11:30:00	96	36.54		97.3947	93.05	85.1111		37.1131	36.8362	36.385
1321	2017-10-09	12:00:00	64	37.1		96.5385	36.8129	83.3333		37.1179	36.8129	36.385
1322	2017-10-09	12:30:00	20	37.32		93.641	87.85	76.7778		37.1273	36.8033	36.385
1323	2017-10-09	13:00:00	77	36.65		93	87.3333	76.4444		37.1227	36.7871	36.3575
1324	2017-10-09	13:30:00	104	37.1		93.275	85.4286	79.2		37.1204	36.7733	36.4783
1325	2017-10-09	14:00:00	55	36.31		91.825	36.7313	77		37.0906	36.7313	36.4683
1326	2017-10-09	14:30:00	89	36.34		92.65	83.381	82.6364		37.0819	36.6858	36.405
1327	2017-10-09	15:00:00	127	36.76		93.9	85.2381	86.3333		37.0773	36.6625	36.405
1328	2017-10-09	15:30:00		35.65		91.5128	85.3	90.7273		37.0471	36.6071	36.3033
1329	2017-10-09	16:00:00	68	36.54		91.9231	84.25	85.3636		37.0529	36.5933	36.3592
1330	2017-10-09	16:30:00	117	37.1		92.5897	82.9	80.9091		37.046	36.5887	36.6533
1331	2017-10-09	17:00:00		37.66		92.5897	36.6029	81.7		37.0483	36.6029	36.7558
1332	2017-10-09	17:30:00	107	37.89		92.8205	83.8947	82.8		37.0531	36.6267	36.8683
1333	2017-10-09	18:00:00		38		92.8205	84.1111	84.8889		37.0554	36.6642	36.9433
1334	2017-10-09	18:30:00		37.89		92.8205	84.4118	93		37.0554	36.6879	36.9908
1335	2017-10-09	19:00:00	108	38		93	36.7304	96.875		37.0625	36.7304	37.1033
1336	2017-10-09	19:30:00		37.97		92.6316	86.0588	95.8571		37.0696	36.8271	37.1758
1337	2017-10-09	20:00:00	104	37.89		92.9231	87.0556	102.857		37.0721	36.8879	37.3075
1338	2017-10-09	20:30:00	101	37.43		93.1026	91.1667	104.571		37.0673	36.9017	37.3983
1339	2017-10-09	21:00:00	192	37.21		93.7692	36.9204	113.857		37.0579	36.9204	37.4358
1340	2017-10-09	21:30:00		37.66		93.9211	99.7222	113.857		37.0663	36.9533	37.6033
1341	2017-10-09	22:00:00		37.89		93.8649	98.1176	121.5		37.071	37.0375	37.7158
1342	2017-10-09	22:30:00	105	37.89		94.0811	94.5294	119.5		37.0781	37.2175	37.7817
1343	2017-10-09	23:00:00		37.89		94.0278	95.875	119.5		37.0806	37.2783	37.8008
1344	2017-10-09	23:30:00	97	37.55		94.3333	95.9375	117.833		37.0783	37.3204	37.7725
1345	2017-10-10	00:00:00	102	37.66		94.3611	98.3125	115.571		37.0783	37.3437	37.7442
1346	2017-10-10	00:30:00	101	37.66		94.75	37.3579	113.75		37.0806	37.3579	37.725
1347	2017-10-10	01:00:00	98	37.43		94.8378	104.688	112.5		37.0888	37.3904	37.6775
1348	2017-10-10	01:30:00	98	37.66		93.5946	104.312	110.889		37.0935	37.4137	37.6517
1349	2017-10-10	02:00:00	92	37.77		93.5405	106.625	109.556		37.1029	37.4746	37.6417
1350	2017-10-10	02:30:00	94	37.55		93.5676	37.525	108.778		37.1054	37.525	37.6517
1351	2017-10-10	03:00:00	102	37.32		93.9459	105.375	98.7778		37.1054	37.5483	37.6608
1352	2017-10-10	03:30:00	84	37.55		93.9459	104.118	97.3		37.1173	37.6275	37.6517
1353	2017-10-10	04:00:00	80	37.55		93.7027	104.824	95.7273		37.1315	37.6696	37.6233
1354	2017-10-10	04:30:00	87	37.66		92.1622	37.6929	94.0909		37.1408	37.6929	37.6042
1355	2017-10-10	05:00:00	92	37.55		92.2973	102.444	93.9167		37.1456	37.6883	37.5758
1356	2017-10-10	05:30:00	88	37.52		92.4054	101.389	93.1667		37.1498	37.6729	37.5733
1357	2017-10-10	06:00:00	102	37.32		93	101.421	93.1667		37.1544	37.6446	37.545
1358	2017-10-10	06:30:00	85	37.43		93.1622	37.6254	91.8333		37.1567	37.6254	37.5258
1359	2017-10-10	07:00:00	94	37.43		93.5405	99.9	91.5		37.166	37.6017	37.5258
1360	2017-10-10	07:30:00	87	37.55		93.3684	99.2857	90.5833		37.2056	37.5842	37.5167
1361	2017-10-10	08:00:00	85	37.66		93.1538	98.381	90		37.2313	37.5746	37.5075
1362	2017-10-10	08:30:00	84	37.21		94.6154	37.5654	89.1667		37.2335	37.5654	37.4792
1363	2017-10-10	09:00:00	82	37.1		94.3	92.3333	87.5		37.2406	37.5608	37.4608
1364	2017-10-10	09:30:00	54	36.98		94.7	90.5909	85		37.2429	37.5325	37.4133
1365	2017-10-10	10:00:00	72	37.21		93.325	89.7826	84.3333		37.2708	37.5042	37.385
1366	2017-10-10	10:30:00	102	37.21		91.725	37.4758	85.5833		37.3467	37.4758	37.3475
1367	2017-10-10	11:00:00	35	36.87		90.775	87.375	80.8333		37.3558	37.4333	37.2908
1368	2017-10-10	11:30:00	65	37.1		90	86.0417	78.9167		37.3675	37.4146	37.2558
1369	2017-10-10	12:00:00	85	36.76		90.525	85.3333	77.5		37.3604	37.3771	37.2092
1370	2017-10-10	12:30:00	94	37.21		92.375	85.0417	78.25		37.3581	37.3583	37.1908
1371	2017-10-10	13:00:00	94	36.98		92.8	84.875	78.25		37.365	37.3396	37.1533
1372	2017-10-10	13:30:00	45	36.76		91.325	37.3021	74.75		37.3579	37.3021	37.0875
1373	2017-10-10	14:00:00	93	34.01		92.275	82.7083	75.4167		37.31	37.1454	36.7833
1374	2017-10-10	14:30:00	127	36.04		93.225	84.0833	79		37.3037	37.0825	36.6858
1375	2017-10-10	15:00:00	97	36.54		92.475	83.875	80.25		37.2992	37.05	36.6392
1376	2017-10-10	15:30:00	47	36.98		91.3659	37.0262	79.6667		37.3269	37.0262	36.6392
1377	2017-10-10	16:00:00	80	37.21		91.6585	82.3333	80.3333		37.3408	37.0121	36.6392
1378	2017-10-10	16:30:00	98	37.66		91.1951	82.7917	80		37.3525	37.0121	36.6767
1379	2017-10-10	17:00:00	117	37.66		91.8095	83.8333	86.8333		37.3525	37.0167	36.7425
1380	2017-10-10	17:30:00	108	37.77		91.8333	37.0271	90.4167		37.35	37.0271	36.7983
1381	2017-10-10	18:00:00	113	37.94		92.3256	85.125	92.75		37.3487	37.0529	36.8967
1382	2017-10-10	18:30:00	110	37.77		92.7273	86.1667	94.0833		37.3462	37.0671	36.9433
1383	2017-10-10	19:00:00	98	37.77		92.5	86.3333	94.4167		37.3415	37.0812	37.0092
1384	2017-10-10	19:30:00	96	37.89		92.5778	37.0954	98.6667		37.3398	37.0954	37.1033
1385	2017-10-10	20:00:00	97	37.77		92.4222	87.2083	99		37.3373	37.1	37.4167
1386	2017-10-10	20:30:00	104	37.77		92.4889	88.0417	97.0833		37.3444	37.1233	37.5608
1387	2017-10-10	21:00:00	113	37.66		90.7333	89.3333	98.4167		37.3537	37.1467	37.6542
1388	2017-10-10	21:30:00	120	37.89		91.3696	37.1846	104.5		37.3585	37.1846	37.73
1389	2017-10-10	22:00:00	102	37.89		91.5957	93.3333	106.333		37.3585	37.2129	37.7867
1390	2017-10-10	22:30:00	104	38		91.5745	93.4167	106.833		37.3608	37.2458	37.815
1391	2017-10-10	23:00:00	101	38		91.7708	96.1667	105.5		37.3631	37.2929	37.8433
1392	2017-10-10	23:30:00	101	37.89		91.8542	37.3258	104.917		37.3702	37.3258	37.8533
1393	2017-10-11	00:00:00	98	38		91.7708	98.2083	103.667		37.3773	37.3775	37.8583
1394	2017-10-11	00:30:00	111	37.89		91.9792	98.9167	103.75		37.3821	37.4058	37.8683
1395	2017-10-11	01:00:00	96	37.77		91.9375	99	103.583		37.3892	37.4387	37.8683
1396	2017-10-11	01:30:00	98	37.89		91.9375	101.208	103.75		37.394	37.4858	37.8683
1397	2017-10-11	02:00:00	94	37.91		91.9792	101.25	103.5		37.3969	37.6483	37.88
1398	2017-10-11	02:30:00	93	37.89		91.9583	37.7254	102.583		37.404	37.7254	37.89
1399	2017-10-11	03:00:00	96	37.89		91.8333	99.7917	101.167		37.4158	37.7817	37.9092
1400	2017-10-11	03:30:00		37.89		92	102.087	99.4545		37.4229	37.8196	37.9092
1401	2017-10-11	04:00:00	96	37.77		92.3404	102.783	98.9091		37.4275	37.8429	37.8992
1402	2017-10-11	04:30:00	100	37.55		92.617	37.8383	98.5455		37.4252	37.8383	37.8617
1403	2017-10-11	05:00:00	104	37.66		92.8723	102.304	98.8182		37.4275	37.8383	37.8333
1404	2017-10-11	05:30:00	89	37.55		92.8936	101.478	97.7273		37.4281	37.8292	37.805
1405	2017-10-11	06:00:00	96	37.32		92.766	100.739	97.5455		37.4281	37.8033	37.7483
1406	2017-10-11	06:30:00	90	37.55		92.8723	37.7942	95.6364		37.4306	37.7942	37.72
1407	2017-10-11	07:00:00	61	37.32		92.1702	98.2609	92.4545		37.4283	37.7754	37.6825
1408	2017-10-11	07:30:00	94	37.55		92.3191	98.1739	92.0909		37.4283	37.7612	37.6542
1409	2017-10-11	08:00:00	84	37.55		92.2979	97.6087	91.1818		37.426	37.7521	37.6242
1410	2017-10-11	08:30:00	83	37.32		92.2766	96.6957	90.2727		37.4283	37.7333	37.5767
1411	2017-10-11	09:00:00	82	37.32		92.2766	95.3478	89		37.4329	37.7192	37.5292
1412	2017-10-11	09:30:00	86	36.76		92.9574	93.8696	88.75		37.4283	37.6721	37.435
1413	2017-10-11	10:00:00	80	37.43		93.1277	37.6529	87.4167		37.4329	37.6529	37.4067
1414	2017-10-11	10:30:00	88	36.98		92.8298	92.2174	86.4167		37.4281	37.6104	37.3592
1415	2017-10-11	11:00:00	119	37.1		94.617	93	87.6667		37.4329	37.5729	37.3125
1416	2017-10-11	11:30:00	91	36.65		95.1702	92.5652	87.8333		37.4235	37.5213	37.2375
1417	2017-10-11	12:00:00	105	36.87		95.5957	37.4742	88.5833		37.4258	37.4742	37.2
1418	2017-10-11	12:30:00	197	36.87		97.7872	96.6087	97.5		37.4187	37.4317	37.1433
1419	2017-10-11	13:00:00	122	36.43		98.383	97.7391	102.583		37.4073	37.3758	37.0692
1420	2017-10-11	13:30:00	64	36.87		98.7872	96.2609	100.083		37.4096	37.3333	37.0125
1421	2017-10-11	14:00:00	72	37.04		98.3404	37.2971	99.0833		37.4727	37.2971	36.97
1422	2017-10-11	14:30:00	86	36.37		97.4681	95	99.3333		37.4796	37.2337	36.8908
1423	2017-10-11	15:00:00	78	36.65		97.0638	94.2174	99		37.4819	37.1821	36.835
1424	2017-10-11	15:30:00	133	37.1		98.8936	95.8333	102.917		37.4844	37.1492	36.8633
1425	2017-10-11	16:00:00	79	37.21		98.8723	37.1258	102.833		37.4844	37.1258	36.845
1426	2017-10-11	16:30:00	111	37.32		99.1489	95.5833	104.75		37.4773	37.1163	36.8733
1427	2017-10-11	17:00:00	101	37.55		98.8085	95.4583	103.25		37.475	37.1117	36.9108
1428	2017-10-11	17:30:00	37	37.1		97.2979	93.2917	98.75		37.461	37.0929	36.9483
1429	2017-10-11	18:00:00	101	37.1		97.0426	37.0838	98.4167		37.4435	37.0838	36.9675
1430	2017-10-11	18:30:00	101	37.43		96.8511	93.9583	90.4167		37.4365	37.0787	37.0142
1431	2017-10-11	19:00:00	98	37.32		96.8511	95.5	88.4167		37.4271	37.0788	37.0883
1432	2017-10-11	19:30:00	182	37.32		98.6809	99.1667	98.25		37.4152	37.0692	37.1258
1433	2017-10-11	20:00:00	80	37.77		98.3191	37.0783	98.9167		37.4152	37.0783	37.1867
1434	2017-10-11	20:30:00	79	37.77		97.7872	98.8333	98.3333		37.4152	37.0971	37.3033
1435	2017-10-11	21:00:00	88	37.43		97.2553	99.0833	99.1667		37.4104	37.1017	37.3683
1436	2017-10-11	21:30:00	170	37.12		98.3191	102.583	102.25		37.3944	37.1167	37.37
1437	2017-10-11	22:00:00	150	37.66		99.3404	105.5	108.167		37.3896	37.1262	37.4075
1438	2017-10-11	22:30:00		37.66		99.2391	106.261	107.909		37.3825	37.1546	37.4358
1439	2017-10-11	23:00:00		37.66		99.2	37.1779	108.6		37.3754	37.1779	37.445
1440	2017-10-11	23:30:00	100	37.55		99.1778	106.091	114.9		37.3683	37.2154	37.4825
1441	2017-10-12	00:00:00	93	37.43		99.0667	105.545	114.1		37.3565	37.2387	37.51
1442	2017-10-12	00:30:00	88	37.55		98.5556	100.591	112.8		37.3494	37.2671	37.52
1443	2017-10-12	01:00:00	88	37.55		98.3778	37.3137	111.8		37.3448	37.3137	37.5392
1444	2017-10-12	01:30:00	90	37.55		98.2	100.227	102.6		37.3377	37.3421	37.5583
1445	2017-10-12	02:00:00	89	37.55		98.0889	101	103.5		37.3302	37.3633	37.54
1446	2017-10-12	02:30:00	88	37.55		97.9778	101.091	104.4		37.3231	37.4125	37.5217
1447	2017-10-12	03:00:00	79	36.98		97.6	37.4262	103.5		37.3042	37.4262	37.4842
1448	2017-10-12	03:30:00	80	37.32		97.2174	98.7273	94.5		37.2923	37.4354	37.5008
1449	2017-10-12	04:00:00	82	37.21		96.913	98.8636	87.7		37.2806	37.4354	37.4633
1450	2017-10-12	04:30:00	74	37.38		96.3478	97.1818	86.4545		37.2771	37.4379	37.44
1451	2017-10-12	05:00:00	119	37.21		96.6739	37.4237	89.1667		37.2677	37.4237	37.4025
1452	2017-10-12	05:30:00	75	37.1		96.3696	99.7273	87.0833		37.2583	37.4237	37.365
1453	2017-10-12	06:00:00		36.98		96.3778	99.6667	86.5455		37.2513	37.4188	37.3275
1454	2017-10-12	06:30:00	74	36.65		96.0222	98.381	85.2727		37.2325	37.3862	37.2525
1455	2017-10-12	07:00:00	86	36.54		96.5778	37.3538	85.0909		37.2163	37.3538	37.1683
1456	2017-10-12	07:30:00		36.76		96.6364	93.6	84.6		37.1998	37.3304	37.1025
1457	2017-10-12	08:00:00	144	36.54		98	96.8	90.1		37.1788	37.2792	37.0183
1458	2017-10-12	08:30:00	34	36.43		96.8864	94.55	84.7		37.1602	37.2233	36.925
1459	2017-10-12	09:00:00	75	36.98		96.7273	37.2046	84.3		37.1531	37.2046	36.925
1460	2017-10-12	09:30:00		36.65		96.9767	89.8947	84.7778		37.1508	37.185	36.8692
1461	2017-10-12	10:00:00	170	36.87		99.0698	90.9474	94.5556		37.1392	37.1521	36.8408
1462	2017-10-12	10:30:00		36.87		99.3333	90.9474	97.125		37.1369	37.1192	36.7983
1463	2017-10-12	11:00:00	93	36.54		98.7143	91.05	93.875		37.1252	37.0725	36.7425
1464	2017-10-12	11:30:00	79	36.98		98.4286	90	94.375		37.1321	37.0487	36.7325
1465	2017-10-12	12:00:00	84	37.1		97.9286	37.035	93.2222		37.1369	37.035	36.7425
1466	2017-10-12	12:30:00	107	37.21		95.7857	90.5	96.8889		37.144	37.0208	36.7892
1467	2017-10-12	13:00:00	73	36.2		94.619	89.75	95.4444		37.1392	36.9646	36.7608
1468	2017-10-12	13:30:00	91	37.55		95.2619	89.8	95		37.1533	36.9646	36.8267
1469	2017-10-12	14:00:00	91	37.43		95.7143	36.9596	89.7		37.1615	36.9596	36.9008
1470	2017-10-12	14:30:00	75	36.2		95.4524	89.25	93.8		37.1579	36.9033	36.8817
1471	2017-10-12	15:00:00	178	36.76		97.8333	94.2	104.1		37.1602	36.8942	36.8633
1472	2017-10-12	15:30:00	51	35.76		95.881	92.75	99.2727		37.1323	36.8292	36.7892
1473	2017-10-12	16:00:00	67	31.96		95.5952	36.6104	89.9091		37.0229	36.6104	36.38
1474	2017-10-12	16:30:00	38	35.98		93.8571	90.2	85.5833		36.995	36.5521	36.3058
1475	2017-10-12	17:00:00	91	36.43		93.619	88.8	85.4167		36.9717	36.5196	36.2967
1476	2017-10-12	17:30:00		36.98		95	89.5263	86		36.9692	36.5146	36.2967
1477	2017-10-12	18:00:00	192	36.87		97.2195	94.65	95.8182		36.9644	36.51	36.2775
1478	2017-10-12	18:30:00	192	37.1		99.439	100.55	103.545		36.9575	36.5288	36.2683
1479	2017-10-12	19:00:00	111	38.23		99.7561	101.8	107		36.9765	36.5992	36.4375
1480	2017-10-12	19:30:00	107	38		97.9268	36.6508	108.455		36.9906	36.6508	36.475
1481	2017-10-12	20:00:00	101	37.89		98.439	100	109.364		36.9931	36.7071	36.5133
1482	2017-10-12	20:30:00	110	37.89		99.1951	103.619	112.545		36.9956	36.7679	36.6542
1483	2017-10-12	21:00:00	127	37.43		100.146	106.095	107.909		36.9956	36.7867	36.71
1484	2017-10-12	21:30:00	125	37.66		99.0488	36.8287	114.636		37.0069	36.8287	36.8683
1485	2017-10-12	22:00:00	108	37.66		98.0244	104.136	118.364		37.0069	36.8617	37.3433
1486	2017-10-12	22:30:00	101	37.77		98.0952	104	124.091		37.0092	36.8992	37.4925
1487	2017-10-12	23:00:00	90	37.77		97.907	103.87	124		37.0115	36.9504	37.6042
1488	2017-10-12	23:30:00	88	37.6		97.6279	36.9762	121		37.0125	36.9762	37.6558
1489	2017-10-13	00:00:00	102	37.32		97.8372	105.043	113.5		37.0102	36.9854	37.6933
1490	2017-10-13	00:30:00	92	37.32		97.9302	104.391	105.167		37.0054	36.99	37.7117
1491	2017-10-13	01:00:00	91	37.32		98	105.174	103.5		37.0006	37.0367	37.6358
1492	2017-10-13	01:30:00	79	37.21		97.7442	37.0225	101.167		36.9935	37.0225	37.57
1493	2017-10-13	02:00:00	87	37.21		97.6977	104.478	100		36.9865	37.0133	37.5133
1494	2017-10-13	02:30:00	86	36.98		97.6512	104.957	98		36.9746	37.0458	37.4375
1495	2017-10-13	03:00:00	89	36.98		97.8837	101.087	94.8333		36.9746	37.055	37.4
1496	2017-10-13	03:30:00	87	37.1		98.0465	37.1108	91.6667		36.97	37.1108	37.3533
1497	2017-10-13	04:00:00	81	37.26		98.0233	103.261	89.4167		36.971	37.3317	37.32
1498	2017-10-13	04:30:00	77	37.21		98.093	104.957	87.4167		36.9675	37.3829	37.2733
1499	2017-10-13	05:00:00	60	36.98		96.7209	103.609	84.9167		36.9627	37.4058	37.2075
1500	2017-10-13	05:30:00		36.98		97.2381	37.4058	84.6364		36.9602	37.4058	37.1558
1501	2017-10-13	06:00:00	89	36.43		97.0465	99.1304	83.4545		36.9488	37.3875	37.0817
1502	2017-10-13	06:30:00	78	36.76		97.1395	94.1739	82.1818		36.951	37.3733	37.035
1503	2017-10-13	07:00:00	50	36.43		96.3023	91.5217	78.4545		36.9488	37.2983	36.9608
1504	2017-10-13	07:30:00	60	36.54		95.4773	89.4783	76.7273		36.9442	37.2375	36.905
1505	2017-10-13	08:00:00		36.65		94.3488	88.9545	75.7		36.9465	37.1858	36.8583
1506	2017-10-13	08:30:00		36.65		95.7857	37.1342	74.5556		36.951	37.1342	36.8308
1507	2017-10-13	09:00:00	80	36.2		95.9048	85.7143	73.5556		36.9348	37.0829	36.7658
1508	2017-10-13	09:30:00	56	36.31		94.9767	82.4286	70.1111		36.9277	37.0267	36.7
1509	2017-10-13	10:00:00	98	36.76		93.3023	81.9524	72		36.9254	36.9892	36.6583
1510	2017-10-13	10:30:00	133	36.98		94.2045	36.9562	78.2222		36.9277	36.9562	36.6392
1511	2017-10-13	11:00:00		36.65		94.2326	83.15	80.5		36.93	36.9096	36.6117
1512	2017-10-13	11:30:00		36.87		94.5952	82.8947	80.5		36.9277	36.8792	36.6025
1513	2017-10-13	12:00:00	153	36.87		96.2381	85.5789	88.5		36.9229	36.8604	36.6392
1514	2017-10-13	12:30:00	89	37.1		95.8095	36.8513	89.875		36.9206	36.8513	36.6675
1515	2017-10-13	13:00:00	192	37.32		98.6429	90.7368	107.625		36.944	36.8513	36.7417
1516	2017-10-13	13:30:00		36.87		98.8293	91.3889	114.429		36.9298	36.8371	36.7692
1517	2017-10-13	14:00:00		36.65		99.025	91.6471	114.429		36.9135	36.8138	36.7692
1518	2017-10-13	14:30:00	91	36.87		99.425	36.8092	111.5		36.9275	36.8092	36.7875
1519	2017-10-13	15:00:00	35	35.21		95.85	88.7647	105.875		36.8952	36.7354	36.705
1520	2017-10-13	15:30:00	39	36.31		95.55	85.9412	103.75		36.9067	36.7025	36.705
1521	2017-10-13	16:00:00	92	36.87		96.175	86.5882	103		37.009	36.6863	36.7142
1522	2017-10-13	16:30:00	159	37.55		99.2	36.7004	106.25		37.0417	36.7004	36.7617
1523	2017-10-13	17:00:00	110	37.89		99.675	94.3529	106.667		37.0721	36.7383	36.865
1524	2017-10-13	17:30:00		37.77		99.675	94.3529	106.667		37.0885	36.7713	36.94
1525	2017-10-13	18:00:00		37.89		97.3077	94.6875	100.875		37.1098	36.8321	37.025
1526	2017-10-13	18:30:00	102	38		95	36.8837	102.5		37.1285	36.8837	37.1
1527	2017-10-13	19:00:00	100	36.76		94.7179	99.3125	91		37.0979	36.8975	37.0533
1528	2017-10-13	19:30:00	136	37.66		95.4615	104.062	96		37.0908	36.9442	37.1192
1529	2017-10-13	20:00:00	117	37.66		95.8718	104.824	98.1		37.086	36.9862	37.2033
1530	2017-10-13	20:30:00	101	37.55		95.641	104.611	99.1		37.079	37.0237	37.26
1531	2017-10-13	21:00:00	105	37.43		95.0769	106	106.1		37.079	37.075	37.445
1532	2017-10-13	21:30:00	110	37.66		94.6923	37.1312	113.2		37.079	37.1312	37.5575
1533	2017-10-13	22:00:00	108	37.43		94.6923	109.556	114.8		37.0742	37.1592	37.6042
1534	2017-10-13	22:30:00	104	37.66		94.7692	107.944	109.3		37.0719	37.1875	37.6133
1535	2017-10-13	23:00:00	104	37.46		95.1282	107.737	108.7		37.0654	37.2212	37.5775
1536	2017-10-13	23:30:00	97	37.32		95.359	37.24	107.636		37.0596	37.24	37.54
1537	2017-10-14	00:00:00		37.1		95.1842	104.789	107.636		37.055	37.2496	37.4742
1538	2017-10-14	00:30:00		37.43		95.2703	105.667	108.2		37.0573	37.2633	37.4267
1539	2017-10-14	01:00:00	89	37.43		95.2162	99.9444	107.1		37.0596	37.2679	37.4825
1540	2017-10-14	01:30:00	90	37.21		95.5135	37.2821	102.5		37.0596	37.2821	37.445
1541	2017-10-14	02:00:00		37.1		95.75	99.4211	100.889		37.0573	37.3008	37.3983
1542	2017-10-14	02:30:00	88	37.1		95.8056	99.2632	99.4444		37.0598	37.3104	37.3608
1543	2017-10-14	03:00:00	80	36.87		95.5556	101.632	96.6667		37.0575	37.3796	37.3142
1544	2017-10-14	03:30:00	76	37.1		95.25	103.579	92.8889		37.0575	37.4125	37.2675
1545	2017-10-14	04:00:00	87	37.1		95.4167	103.316	90.5556		37.0542	37.4221	37.24
1546	2017-10-14	04:30:00	79	37.1		95.4722	99.1053	87.7778		37.0519	37.4033	37.1933
1547	2017-10-14	05:00:00	71	36.98		95.7778	37.3654	84.1111		37.0519	37.3654	37.1533
1548	2017-10-14	05:30:00	75	36.98		95.2162	95.95	81.6667		37.0519	37.3325	37.125
1549	2017-10-14	06:00:00	72	36.87		94.7568	94.8095	80.7		37.061	37.29	37.1058
1550	2017-10-14	06:30:00	83	37.1		94.8919	93.9048	80.9091		37.0681	37.2525	37.0783
1551	2017-10-14	07:00:00		37.1		96.1389	37.2667	80.1		37.0821	37.2667	37.0508
1552	2017-10-14	07:30:00	87	37.21		96.8889	91.15	79.8		37.096	37.2479	37.0508
1553	2017-10-14	08:00:00	80	37.1		96.4324	89.3	79.8182		37.1054	37.2246	37.0508
1554	2017-10-14	08:30:00	55	35.76		95.3421	87	76.8182		37.0869	37.15	36.9392
1555	2017-10-14	09:00:00	150	35.57		97.1842	37.0725	83.1818		37.0737	37.0725	36.8308
1556	2017-10-14	09:30:00	61	36.31		97.3158	86.8	81.8182		37.0737	37.0163	36.765
1557	2017-10-14	10:00:00		36.2		97.2973	85.6842	81.3		37.0621	36.965	36.69
1558	2017-10-14	10:30:00	93	36.79		96.2162	85.1053	82.7		37.0581	36.9288	36.6642
1559	2017-10-14	11:00:00	70	36.98		95.5263	36.9088	82.6		37.065	36.9088	36.6642
1560	2017-10-14	11:30:00	52	36.65		94.4103	80.9474	80.3		37.0604	36.8808	36.6367
1561	2017-10-14	12:00:00	88	36.43		92.7436	81.3	81.9		37.0512	36.8529	36.6
1562	2017-10-14	12:30:00	53	36.54		91.8205	79.9524	78.9		37.0396	36.8158	36.5533
1563	2017-10-14	13:00:00	56	36.09		88.3333	36.76	76.8182		37.014	36.76	36.4692
1564	2017-10-14	13:30:00	77	35.32		88.05	77.7619	75.9091		36.9817	36.6813	36.3117
1565	2017-10-14	14:00:00	147	35.98		89.4878	80.9091	82		36.9677	36.6346	36.2183
1566	2017-10-14	14:30:00	49	36.76		88.4634	79.1364	81.4545		36.9654	36.6204	36.3017
1567	2017-10-14	15:00:00	141	37.24		91.0488	36.6358	80.6364		37.0077	36.6358	36.4408
1568	2017-10-14	15:30:00	55	36.87		91.439	80.9545	80.0909		37.0194	36.6262	36.4875
1569	2017-10-14	16:00:00		32.93		91.425	80.6667	80.0909		36.9373	36.4525	36.215
1570	2017-10-14	16:30:00		37.1		89.6923	80.75	78.8		36.9279	36.4525	36.2408
1571	2017-10-14	17:00:00	97	37.43		89.359	82.05	81.5		36.9183	36.4712	36.2783
1572	2017-10-14	17:30:00	108	37.43		89.825	83.7	87.1		36.9113	36.49	36.3433
1573	2017-10-14	18:00:00	78	37.43		89.5366	36.5133	86.1		36.9017	36.5133	36.4267
1574	2017-10-14	18:30:00	110	38		89.7317	85.35	91.8		36.9017	36.5508	36.5483
1575	2017-10-14	19:00:00	107	38.23		89.9024	86.381	96.9		36.9323	36.5979	36.7267
1576	2017-10-14	19:30:00		38		88.75	86.35	99.1111		36.9394	36.6308	36.95
1577	2017-10-14	20:00:00		37.89		88.0256	36.6637	93.125		36.9442	36.6637	37.1092
1578	2017-10-14	20:30:00	42	37.21		86.5128	86	92.25		36.9371	36.7242	37.1467
1579	2017-10-14	21:00:00		37.43		86.0263	82.4444	85.2857		36.9371	36.8017	37.1625
1580	2017-10-14	21:30:00	153	37.43		87.1579	87.5556	99.2857		36.9323	36.8483	37.2092
1581	2017-10-14	22:00:00	144	37.32		88.1053	36.895	104.875		36.93	36.895	37.575
1582	2017-10-14	22:30:00	93	37.32		87.8158	90.5263	103.556		36.9229	36.9171	37.5933
1583	2017-10-14	23:00:00	86	36.98		87.3421	91.3684	102.333		36.9129	36.9171	37.5558
1584	2017-10-14	23:30:00	89	37.1		87.1316	93.3158	100.222		36.9083	36.9358	37.5283
1585	2017-10-15	00:00:00	85	37.1		87.0769	36.9638	101		36.9083	36.9638	37.5008
1586	2017-10-15	00:30:00	87	37.1		87.075	94.9474	98.4444		36.9015	36.9871	37.4258
1587	2017-10-15	01:00:00	86	36.98		87	96.5263	96.1111		36.8921	37.0242	37.3217
1588	2017-10-15	01:30:00	113	36.98		87.575	98.4211	97.8		36.8873	37.0933	37.2367
1589	2017-10-15	02:00:00	78	36.98		87.3415	37.135	96		36.8848	37.135	37.1608
1590	2017-10-15	02:30:00	71	36.87		86.9268	95.9474	98.6364		36.88	37.1396	37.1325
1591	2017-10-15	03:00:00	75	36.76		86.8049	92.4737	96.6667		36.8777	37.1196	37.0767
1592	2017-10-15	03:30:00	80	36.76		86.9024	93.7895	90.5833		36.8706	37.115	37.0208
1593	2017-10-15	04:00:00	83	36.76		86.8049	37.2746	85.5		36.8635	37.2746	36.9742
1594	2017-10-15	04:30:00	79	36.76		86.8049	92.5714	84.3333		36.8565	37.2604	36.9275
1595	2017-10-15	05:00:00	84	36.87		87.122	91.9524	84.1667		36.8542	37.2371	36.9183
1596	2017-10-15	05:30:00	64	36.65		86.8537	89.8571	82.0833		36.8473	37.2046	36.8808
1597	2017-10-15	06:00:00	178	36.43		89.439	94.619	89.8333		36.8381	37.1629	36.825
1598	2017-10-15	06:30:00	156	36.09		91.2195	96.8095	95.5833		36.8171	37.0833	36.7408
1599	2017-10-15	07:00:00	78	36.43		90.9048	37.0083	94.9167		36.8031	37.0083	36.695
1600	2017-10-15	07:30:00	60	36.76		90.2619	93.8182	90.5		36.7937	36.9567	36.6767
1601	2017-10-15	08:00:00	133	36.59		91.5238	95.5217	95.0833		36.7831	36.9025	36.6442
1602	2017-10-15	08:30:00		36.87		92.4146	97.9545	97.2727		36.8062	36.8883	36.6442
1603	2017-10-15	09:00:00	150	36.54		92.4146	36.8513	104.091		36.8265	36.8513	36.6258
1604	2017-10-15	09:30:00	104	36.01		93.4634	98.087	106.273		36.8202	36.7921	36.5633
1605	2017-10-15	10:00:00		35.76		93.4634	96	108.6		36.811	36.7271	36.48
1606	2017-10-15	10:30:00	178	36.54		95.5366	99.8636	118.5		36.8058	36.6946	36.4617
1607	2017-10-15	11:00:00	76	36.73		95.6829	36.6842	117.7		36.8006	36.6842	36.45
1608	2017-10-15	11:30:00	69	36.65		96.0976	98.5	118.2		36.8006	36.6654	36.45
1609	2017-10-15	12:00:00		36.76		96.3	99.1429	111.556		36.8075	36.6512	36.4775
1610	2017-10-15	12:30:00	47	36.65		96.15	97.2381	99.4444		36.8098	36.6325	36.5242
1611	2017-10-15	13:00:00	100	36.73		97.25	97.9048	101.889		36.8231	36.6221	36.5492
1612	2017-10-15	13:30:00	93	36.87		97.65	96.9524	105.556		36.8554	36.6175	36.5583
1613	2017-10-15	14:00:00	46	36.98		95.125	95.4286	95.8889		36.8762	36.6175	36.5908
1614	2017-10-15	14:30:00	38	36.76		94.85	36.6129	90.1		36.8763	36.6129	36.5817
1615	2017-10-15	15:00:00	94	34.99		93.675	94.7619	84.5		36.8294	36.5392	36.4525
1616	2017-10-15	15:30:00	53	36.31		93.625	93.4762	79.4		36.8177	36.5204	36.4775
1617	2017-10-15	16:00:00	64	36.87		92.9024	92.5714	78		36.8998	36.525	36.57
1618	2017-10-15	16:30:00	86	37.29		92.7381	36.5471	69.6364		36.9037	36.5471	36.6325
1619	2017-10-15	17:00:00	102	37.43		92.8571	93.7619	72		36.9037	36.5704	36.6908
1620	2017-10-15	17:30:00	107	37.55		92.8333	95.8095	75.4545		36.9062	36.6079	36.7658
1621	2017-10-15	18:00:00	110	37.55		93.5952	92.5714	78.3333		36.9087	36.6546	36.8317
1622	2017-10-15	18:30:00	110	37.66		93.5952	36.72	83.5833		36.9017	36.72	36.9158
1623	2017-10-15	19:00:00	101	37.43		93.4524	91.4762	83.6667		36.885	36.7617	36.9742
1624	2017-10-15	19:30:00	104	37.32		93.6977	93.5714	84.5833		36.8708	36.785	37.0117
1625	2017-10-15	20:00:00	110	37.32		94.0682	92.4762	89.9167		36.859	36.8154	37.04
1626	2017-10-15	20:30:00	98	37.66		95.3409	36.8483	94.9167		36.8683	36.8483	37.115
1627	2017-10-15	21:00:00	107	37.66		95.6	90.7727	96		36.8731	36.895	37.3375
1628	2017-10-15	21:30:00	102	37.66		94.4667	90.6818	100.083		36.8779	36.9637	37.45
1629	2017-10-15	22:00:00	104	37.43		93.5778	91.2609	103.417		36.8802	37.0333	37.4967
1630	2017-10-15	22:30:00	97	37.55		93.6667	37.0754	104.333		36.885	37.0754	37.5183
1631	2017-10-15	23:00:00	100	37.55		93.9778	88.7826	104.167		36.8969	37.1096	37.5283
1632	2017-10-15	23:30:00	113	37.43		94.5111	90.6957	104.667		36.9037	37.1421	37.5183
1633	2017-10-16	00:00:00	120	37.32		95.2889	91.9167	105.5		36.9083	37.1654	37.4992
1634	2017-10-16	00:30:00	102	37.32		95.6222	37.1933	104.833		36.9129	37.1933	37.4708
1635	2017-10-16	01:00:00	100	37.55		95.9333	94.2083	104.75		36.9248	37.2275	37.4808
1636	2017-10-16	01:30:00	94	37.55		95.5111	94.25	103.917		36.9367	37.2558	37.5
1637	2017-10-16	02:00:00	92	37.55		95.8222	96.1667	102.417		36.9485	37.2796	37.5192
1638	2017-10-16	02:30:00	96	37.55		96.3778	98.5833	102.25		36.9627	37.3125	37.51
1639	2017-10-16	03:00:00		37.21		96.8636	98.7826	101.818		36.9721	37.405	37.4725
1640	2017-10-16	03:30:00	94	37.1		97.1818	37.4379	101.091		36.9792	37.4379	37.4258
1641	2017-10-16	04:00:00	96	37.32		97.4773	101.957	100.364		36.9908	37.4567	37.4167
1642	2017-10-16	04:30:00		37.32		97.907	102.682	100.7		37.0025	37.4579	37.3975
1643	2017-10-16	05:00:00	91	37.43		98.0698	102.182	99.8		37.0142	37.4579	37.3875
1644	2017-10-16	05:30:00	91	36.98		98.6977	37.4342	97.6		37.021	37.4342	37.35
1645	2017-10-16	06:00:00	87	36.84		96.5814	100.409	94.3		37.0296	37.4046	37.31
1646	2017-10-16	06:30:00	92	36.76		95.093	99.5909	93.3		37.0435	37.3671	37.2633
1647	2017-10-16	07:00:00	94	36.43		95.4651	99.2727	92.7		37.0435	37.3254	37.17
1648	2017-10-16	07:30:00	94	36.43		96.2558	37.2883	92.7		37.0367	37.2883	37.0767
1649	2017-10-16	08:00:00	87	36.98		95.186	97.7727	92.2		37.0448	37.2742	37.0292
1650	2017-10-16	08:30:00	78	37.21		94.7955	96.8636	90.4		37.0519	37.2554	37.0008
1651	2017-10-16	09:00:00	41	35.76		92.3182	93.8636	85.9091		37.0356	37.1763	36.88
1652	2017-10-16	09:30:00	192	36.76		94.3182	37.1387	94.8182		37.0512	37.1387	36.8517
1653	2017-10-16	10:00:00	91	35.98		94.2444	97.3636	94.3636		37.0558	37.0783	36.74
1654	2017-10-16	10:30:00		36.59		92.3409	97.381	94.3636		37.0569	37.0383	36.6792
1655	2017-10-16	11:00:00	77	37.1		92.3636	96.2857	93.0909		37.0646	37.0196	36.6517
1656	2017-10-16	11:30:00	36	37.32		91.6136	37.015	88.0909		37.0785	37.015	36.68
1657	2017-10-16	12:00:00	187	36.87		93.7333	95.8095	97.1818		37.0808	36.9963	36.6825
1658	2017-10-16	12:30:00		36.09		94.7955	95.5	97.7		37.0692	36.945	36.6267
1659	2017-10-16	13:00:00	144	36.76		95.7955	97.7	102.7		37.0698	36.9121	36.6542
1660	2017-10-16	13:30:00	90	36.31		95.7273	36.8604	102.3		37.0581	36.8604	36.6442
1661	2017-10-16	14:00:00	37	35.1		95.5227	94.75	97.3		37.019	36.7583	36.4875
1662	2017-10-16	14:30:00	108	36.65		97.1136	95.35	100.3		37.0167	36.7208	36.4408
1663	2017-10-16	15:00:00	159	35.32		98.5909	98.381	112.1		37.0235	36.6421	36.4042
1664	2017-10-16	15:30:00	38	35.95		98.25	95.7143	96.7		37.016	36.5942	36.3367
1665	2017-10-16	16:00:00	76	36.76		98.5227	94.7619	95.2		37.0137	36.5708	36.4017
1666	2017-10-16	16:30:00	100	37.46		98.8409	36.5767	95.6364		37.0173	36.5767	36.4742
1667	2017-10-16	17:00:00		37.66		98.7674	95.1905	97.5		37.0221	36.5863	36.5208
1668	2017-10-16	17:30:00	105	37.55		98.7209	95.8571	104.4		37.0221	36.61	36.54
1669	2017-10-16	18:00:00	101	37.55		98.5116	96.5238	95.8		37.0221	36.6396	36.5967
1670	2017-10-16	18:30:00	97	37.89		98.2093	36.6867	95.9091		37.0269	36.6867	36.7467
1671	2017-10-16	19:00:00	110	37.66		98.4186	97.5238	92.8182		37.0317	36.7379	36.8217
1672	2017-10-16	19:30:00	117	37.77		98.7209	98.619	95.2727		37.041	36.7937	36.9433
1673	2017-10-16	20:00:00		37.49		98.4524	99.2	101.1		37.0446	36.815	37.1425
1674	2017-10-16	20:30:00		37.89		98.4634	36.8433	100.333		37.0494	36.8433	37.2458
1675	2017-10-16	21:00:00		37.89		98.25	103.611	93		37.0542	36.9321	37.46
1676	2017-10-16	21:30:00	96	37.55		98.1	98.2778	100.25		37.0519	36.965	37.5933
1677	2017-10-16	22:00:00	98	37.55		97.95	98.6667	103		37.0544	37.0304	37.6592
1678	2017-10-16	22:30:00	111	37.43		98.3	99.3158	104.375		37.0519	37.0654	37.6567
1679	2017-10-16	23:00:00	117	37.55		98.725	101.421	105.778		37.0519	37.0842	37.6475
1680	2017-10-16	23:30:00	107	37.89		98.575	105.158	106		37.0615	37.1079	37.6758
1681	2017-10-17	00:00:00	105	37.77		98.2	37.1454	106.444		37.0708	37.1454	37.6942
1682	2017-10-17	00:30:00	108	37.55		98.35	101.2	107.667		37.0756	37.2062	37.6658
1683	2017-10-17	01:00:00	98	37.55		98.3	98.9	106.333		37.0756	37.2392	37.6567
1684	2017-10-17	01:30:00	102	37.55		98.5	99.5	104.667		37.0756	37.2908	37.6383
1685	2017-10-17	02:00:00		37.29		98.6667	37.3821	104.667		37.0702	37.3821	37.6217
1686	2017-10-17	02:30:00	92	37.43		98.5641	101.947	103.4		37.0677	37.4146	37.5833
1687	2017-10-17	03:00:00	91	37.55		98.375	98.3684	102.273		37.0748	37.5075	37.555
1688	2017-10-17	03:30:00		37.21		98.4872	101.722	102.9		37.0771	37.56	37.5267
1689	2017-10-17	04:00:00	110	37.43		98.8462	37.5879	104.1		37.0794	37.5879	37.5167
1690	2017-10-17	04:30:00	104	37.66		98.975	103.833	103.4		37.0865	37.5962	37.5358
1691	2017-10-17	05:00:00	101	37.55		99.225	103.684	101.8		37.089	37.5917	37.5358
1692	2017-10-17	05:30:00	94	37.21		99.3	103.105	100.5		37.0938	37.5775	37.4792
1693	2017-10-17	06:00:00	88	37.55		99.325	37.5775	98.8		37.1085	37.5775	37.4608
1694	2017-10-17	06:30:00	90	37.43		99.275	102.053	97		37.1225	37.5583	37.4508
1695	2017-10-17	07:00:00	84	37.43		99.025	100.684	95.6		37.1433	37.5487	37.4408
1696	2017-10-17	07:30:00	81	37.43		98.7	98.7895	93.5		37.1642	37.5346	37.4308
1697	2017-10-17	08:00:00	84	37.55		98.625	37.5371	92.6364		37.176	37.5371	37.4525
1698	2017-10-17	08:30:00	85	37.32		98.8	97.4286	92		37.1783	37.5133	37.4433
1699	2017-10-17	09:00:00	78	37.21		99.725	96.5455	90.8182		37.2085	37.485	37.415
1700	2017-10-17	09:30:00	36	36.54		95.825	93.8182	86.25		37.204	37.4429	37.3592
1701	2017-10-17	10:00:00	94	36.76		95.9	37.41	84.9167		37.2202	37.41	37.3033
1702	2017-10-17	10:30:00	111	36.98		96.2683	93.6364	85.5		37.2283	37.3912	37.2467
1703	2017-10-17	11:00:00	88	36.65		96.5366	92.3182	84.4167		37.219	37.3537	37.1717
1704	2017-10-17	11:30:00	83	36.98		97.6829	91.2273	83.5		37.2119	37.3158	37.1525
1705	2017-10-17	12:00:00	75	37.1		94.9512	89.8636	82.4167		37.2167	37.2879	37.115
1706	2017-10-17	12:30:00	101	36.54		95.0952	89.5455	83.3333		37.226	37.2458	37.0408
1707	2017-10-17	13:00:00	102	36.76		94.0952	89.7273	84.8333		37.226	37.2129	36.985
1708	2017-10-17	13:30:00		36.76		94.1951	37.18	85.1818		37.2354	37.18	36.9292
1709	2017-10-17	14:00:00	28	36.65		93.9756	86.3636	80.0909		37.2677	37.1533	36.8542
1710	2017-10-17	14:30:00	84	37.1		93.3902	86	80		37.2771	37.1396	36.8358
1711	2017-10-17	15:00:00	45	36.98		90.6098	83.9091	77		37.3117	37.1158	36.8167
1712	2017-10-17	15:30:00		37.1		91.925	83.9091	81.1		37.3356	37.1112	36.8633
1713	2017-10-17	16:00:00	32	34.99		90.825	80.3636	74.9		37.2987	37.0096	36.7158
1714	2017-10-17	16:30:00	20	36.98		88.825	76.5455	65.8		37.2887	36.9812	36.7158
1715	2017-10-17	17:00:00	120	37.55		89.5854	36.9812	69		37.2865	36.9812	36.7908
1716	2017-10-17	17:30:00	18	37.77		87.4634	73.9545	62.5		37.291	37.0046	36.8567
1717	2017-10-17	18:00:00	14	37.89		85.3415	70.5909	56.4		37.2981	37.0188	36.9225
1718	2017-10-17	18:30:00	113	37.89		85.7317	71.6364	57.6		37.2981	37.0379	37.035
1719	2017-10-17	19:00:00	100	38		85.4878	72.3636	57.4		37.3052	37.0617	37.1383
1720	2017-10-17	19:30:00	57	37.89		84.0244	71.2727	57.3636		37.3077	37.0808	37.2325
1721	2017-10-17	20:00:00	100	37.77		84.4048	72	63.9091		37.3135	37.09	37.3258
1722	2017-10-17	20:30:00	100	37.55		84.7674	37.0996	65.3636		37.3065	37.0996	37.3633
1723	2017-10-17	21:00:00	141	37.55		86.0455	75.5455	74.0909		37.2994	37.1137	37.4108
1724	2017-10-17	21:30:00		37.21		85.814	77.4286	74.0909		37.2923	37.1417	37.42
1725	2017-10-17	22:00:00	44	37.21		84.5581	75.0476	75.1818		37.2852	37.1604	37.605
1726	2017-10-17	22:30:00	80	37.21		83.8372	73.5714	80.6364		37.2806	37.17	37.6242
1727	2017-10-17	23:00:00	48	38		82.2326	71.6667	74.0909		37.29	37.2263	37.6617
1728	2017-10-17	23:30:00	111	38		82.3256	73	82.5455		37.2923	37.2688	37.6808
1729	2017-10-18	00:00:00	105	37.77		82.3256	37.2967	90.8182		37.2923	37.2967	37.6708
1730	2017-10-18	00:30:00	96	37.55		82.0465	74.1905	89.2727		37.2923	37.3387	37.6425
1731	2017-10-18	01:00:00	97	37.32		82.0233	73.9524	89		37.2875	37.3621	37.5858
1732	2017-10-18	01:30:00	92	37.43		81.7907	74.7727	92.1818		37.285	37.39	37.5475
1733	2017-10-18	02:00:00		36.65		81.7907	77	91.4		37.2717	37.39	37.4542
1734	2017-10-18	02:30:00	87	37.21		81.6744	77.1429	90.1		37.2671	37.3946	37.4258
1735	2017-10-18	03:00:00	88	37.21		81.6047	79.1905	84.8		37.26	37.4042	37.3975
1736	2017-10-18	03:30:00	83	36.93		81.6364	37.3971	84.6364		37.2542	37.3971	37.3742
1737	2017-10-18	04:00:00	84	36.98		81.0455	81.7273	88.2727		37.2448	37.48	37.355
1738	2017-10-18	04:30:00	85	37.1		80.6136	84.6818	88.7273		37.2331	37.485	37.3458
1739	2017-10-18	05:00:00	80	36.87		80.1364	82.8636	91.6364		37.219	37.4567	37.2517
1740	2017-10-18	05:30:00	79	36.87		79.7955	85.6364	88.7273		37.2119	37.4192	37.1575
1741	2017-10-18	06:00:00	87	36.98		79.7727	88.9545	87.0909		37.2	37.3813	37.0917
1742	2017-10-18	06:30:00	85	36.87		79.6591	87.6818	86.0909		37.1883	37.3387	37.035
1743	2017-10-18	07:00:00	88	37.1		79.75	37.3013	85.2727		37.1815	37.3013	37.0167
1744	2017-10-18	07:30:00	55	37.21		79.1591	87.0455	81.9091		37.1769	37.2729	36.9983
1745	2017-10-18	08:00:00	50	36.87		78.3864	84.7727	79.25		37.1627	37.2354	37.0167
1746	2017-10-18	08:30:00	52	36.98		77.6364	82.5909	76.3333		37.1556	37.2117	36.9975
1747	2017-10-18	09:00:00	68	36.54		77.4091	79.2727	74.6667		37.1417	37.1696	36.9417
1748	2017-10-18	09:30:00	153	36.09		80.0682	82.4783	80.5		37.1323	37.1229	36.8717
1749	2017-10-18	10:00:00	90	36.09		79.9773	84.4783	81		37.1183	37.0763	36.7975
1750	2017-10-18	10:30:00		36.31		79.2558	37.0388	80.6364		37.1044	37.0388	36.7317
1751	2017-10-18	11:00:00	66	36.51		78.7442	85.5	79.3636		37.1015	36.9767	36.7017
1752	2017-10-18	11:30:00		36.43		78.6429	84.2857	79.4		37.09	36.9113	36.665
1753	2017-10-18	12:00:00		36.31		78.7317	83.25	78.5556		37.0735	36.8504	36.6092
1754	2017-10-18	12:30:00	77	36.54		78.1463	82.3	77.6667		37.0735	36.8083	36.5817
1755	2017-10-18	13:00:00	76	36.76		77.5122	81.25	76.3333		37.0735	36.785	36.5533
1756	2017-10-18	13:30:00	93	36.54		77.881	81.3	80.5556		37.069	36.7479	36.4975
1757	2017-10-18	14:00:00	66	36.43		78.7857	36.7387	82.3333		37.0644	36.7387	36.4608
1758	2017-10-18	14:30:00	192	32.17		81.3571	85.5714	97.8889		36.9617	36.5287	36.06
1759	2017-10-18	15:00:00	113	35.87		82.9762	86.7619	102.889		36.9385	36.4729	36.0042
1760	2017-10-18	15:30:00	18	36.54		81.4651	83.6667	87.8889		36.9269	36.4567	36.0417
1761	2017-10-18	16:00:00	78	36.54		82.5349	83.381	86.5556		36.9592	36.4383	36.0792
1762	2017-10-18	16:30:00	102	36.87		84.4419	84.1905	88.1		36.9569	36.4287	36.1258
1763	2017-10-18	17:00:00	101	36.98		84	85.1905	91.6		36.945	36.4333	36.165
1764	2017-10-18	17:30:00	108	37.1		86.093	36.4429	93.0909		36.931	36.4429	36.2208
1765	2017-10-18	18:00:00	108	37.21		88.2791	87.5714	94.3333		36.9169	36.4525	36.2958
1766	2017-10-18	18:30:00	110	37.43		88.2093	88.7619	97.0833		36.9073	36.4758	36.37
1767	2017-10-18	19:00:00	96	37.55		88.1163	89.1429	98.75		36.8979	36.4946	36.4358
1768	2017-10-18	19:30:00	102	37.32		89.1628	91.381	99.5		36.886	36.4992	36.5008
1769	2017-10-18	20:00:00	110	37.21		89.3953	94.2381	103.167		36.8744	36.5133	36.5658
1770	2017-10-18	20:30:00	131	37.32		90.1163	98	98.0833		36.8696	36.5275	36.995
1771	2017-10-18	21:00:00	174	36.43		90.8837	36.5229	103.167		36.8462	36.5229	37.0417
1772	2017-10-18	21:30:00		36.98		90.8837	100.55	110.909		36.8415	36.56	37.0783
1773	2017-10-18	22:00:00	93	37.43		92.0233	100.7	112.273		36.846	36.6158	37.1525
1774	2017-10-18	22:30:00	107	37.21		92.6512	101	112.727		36.846	36.6533	37.1808
1775	2017-10-18	23:00:00	100	37.21		93.8605	102.619	112.636		36.8296	36.6825	37.2
1776	2017-10-18	23:30:00	97	36.98		93.5349	102.364	111.636		36.8083	36.7054	37.19
1777	2017-10-19	00:00:00	98	36.76		93.3721	102.174	110.727		36.7873	36.7242	37.1525
1778	2017-10-19	00:30:00	97	36.87		93.3953	36.7379	109.545		36.7731	36.7379	37.1058
1779	2017-10-19	01:00:00	90	36.98		93.2326	103.652	109		36.766	36.7471	37.0583
1780	2017-10-19	01:30:00	92	36.87		93.2326	103.609	108.091		36.7544	36.7608	37.0208
1781	2017-10-19	02:00:00	93	36.76		93.2273	104.783	106.545		36.7567	36.7746	36.9833
1782	2017-10-19	02:30:00	90	36.76		93.2955	100.348	102.818		36.7473	36.9658	36.9367
1783	2017-10-19	03:00:00	86	36.76		93.25	99.1739	94.8182		36.7379	37.0029	36.9642
1784	2017-10-19	03:30:00	84	36.65		93.2727	102.043	93.9167		36.7321	37.0075	36.9367
1785	2017-10-19	04:00:00	86	36.65		93.3182	37.0121	93.3333		36.7252	37.0121	36.8717
1786	2017-10-19	04:30:00	78	36.65		93.1591	101.348	90.9167		36.7158	37.0029	36.825
1787	2017-10-19	05:00:00	87	36.56		93.3182	100.739	89.8333		36.7094	36.9854	36.7708
1788	2017-10-19	05:30:00	93	36.76		93.6364	100.087	89.5		36.7071	36.9712	36.7525
1789	2017-10-19	06:00:00	70	36.87		93.25	98.4348	87.1667		36.7048	36.9571	36.7617
1790	2017-10-19	06:30:00	82	36.98		93.1818	97.2174	85.9167		36.7071	36.9383	36.7708
1791	2017-10-19	07:00:00		36.98		93.3023	97.2727	85.5455		36.7046	36.9146	36.7708
1792	2017-10-19	07:30:00	70	36.87		93.6512	36.8958	83.5455		36.6975	36.8958	36.7708
1793	2017-10-19	08:00:00		36.54		94.6905	95.1429	82.6		36.6906	36.8679	36.7525
1794	2017-10-19	08:30:00	66	36.31		95.0238	92.0476	80.2		36.6767	36.8258	36.715
1795	2017-10-19	09:00:00		36.09		95.6829	87.95	79.5556		36.6673	36.8117	36.6592
1796	2017-10-19	09:30:00		36.87		94.25	87.95	79		36.6835	36.8071	36.6775
1797	2017-10-19	10:00:00	72	36.98		93.8	86.9	77.25		36.7021	36.7883	36.705
1798	2017-10-19	10:30:00	33	36.43		92.3171	83.2	71.625		36.7046	36.7558	36.6867
1799	2017-10-19	11:00:00	105	36.31		93.2683	36.7183	73.875		36.7004	36.7183	36.6658
1800	2017-10-19	11:30:00	111	35.98		93.6905	84.15	76.125		36.691	36.6767	36.6008
1801	2017-10-19	12:00:00		36.17		93.6905	83.4211	77		36.6881	36.6521	36.5425
1802	2017-10-19	12:30:00	90	37.1		94	83.0526	78.1429		36.6998	36.6617	36.5525
1803	2017-10-19	13:00:00	97	36.82		94.5	83.4211	80.5		36.701	36.655	36.5392
1804	2017-10-19	13:30:00	159	37.07		96.0714	86.9474	91.625		36.7121	36.6633	36.5558
1805	2017-10-19	14:00:00	61	37.21		95.9524	85.2632	88.2222		36.7283	36.6821	36.6117
1806	2017-10-19	14:30:00	75	37.1		93.1667	36.6963	89.2222		36.831	36.6963	36.6775
1807	2017-10-19	15:00:00		36.31		92.6829	84.3889	89.2222		36.8402	36.6775	36.6958
1808	2017-10-19	15:30:00	24	36.54		92.8293	81.0556	82.7		36.8402	36.6729	36.6683
1809	2017-10-19	16:00:00	25	37.1		91.5366	77.6667	78		36.8519	36.6917	36.6783
1810	2017-10-19	16:30:00	86	37.21		91.1463	78.1111	83.3		36.859	36.715	36.7433
1811	2017-10-19	17:00:00	100	37.32		91.122	78.8333	82.8		36.866	36.7467	36.8275
1812	2017-10-19	17:30:00	30	37.43		89.2195	75.3333	74.7		36.8729	36.7746	36.9483
1813	2017-10-19	18:00:00		37.66		88.75	36.8075	74.7		36.8823	36.8075	37.0725
1814	2017-10-19	18:30:00	174	37.66		90.35	81.0588	83.1		36.8871	36.8358	37.1192
1815	2017-10-19	19:00:00	97	37.43		90.375	81.9444	83.1		36.8846	36.8546	37.17
1816	2017-10-19	19:30:00		37.55		90.0769	82.6471	74.6667		36.8894	36.8829	37.21
1817	2017-10-19	20:00:00	96	37.55		89.7179	83.3889	78.5556		36.8965	36.925	37.2383
1818	2017-10-19	20:30:00	101	37.32		88.9487	85.3333	81.4444		36.8965	36.9671	37.2567
1819	2017-10-19	21:00:00	28	37.32		85.2051	82.3158	76.1		36.915	37.0183	37.3408
1820	2017-10-19	21:30:00	105	37.43		85.7	37.0417	84.2		36.9244	37.0417	37.415
1821	2017-10-19	22:00:00	100	37.66		85.875	84.85	91.7		36.9292	37.07	37.4617
1822	2017-10-19	22:30:00	102	37.32		85.75	88.3	93.3		36.9315	37.1071	37.4708
1823	2017-10-19	23:00:00	98	37.21		85.7	87.95	93.1		36.9315	37.1446	37.4617
1824	2017-10-19	23:30:00	100	37.1		85.775	87.4	100.1		36.934	37.1912	37.4342
1825	2017-10-20	00:00:00	90	36.87		85.575	87.5238	99.1818		36.9362	37.2204	37.3683
1826	2017-10-20	00:30:00	92	36.87		85.45	87.619	91.7273		36.9362	37.2108	37.3025
1827	2017-10-20	01:00:00	94	36.87		85.55	37.2129	91.4545		36.934	37.2129	37.2558
1828	2017-10-20	01:30:00	89	36.98		85.475	84.1429	91.25		36.9363	37.2092	37.2083
1829	2017-10-20	02:00:00	92	36.98		85.45	85.619	90.9167		36.9408	37.1996	37.1608
1830	2017-10-20	02:30:00	102	36.87		85.75	86.9048	91		36.9431	37.19	37.1233
1831	2017-10-20	03:00:00	89	36.98		85.825	87	96.0833		36.9477	37.2179	37.095
1832	2017-10-20	03:30:00	85	36.98		85.85	89.7727	94.4167		36.9546	37.2363	37.0575
1833	2017-10-20	04:00:00	94	36.98		86.05	92.9091	93.9167		36.9615	37.2313	37.0008
1834	2017-10-20	04:30:00	120	36.87		87.1	37.2171	95.4167		36.966	37.2171	36.9633
1835	2017-10-20	05:00:00	84	36.76		87.025	93.7273	94.25		36.9702	37.1938	36.9258
1836	2017-10-20	05:30:00	87	36.65		86.875	96.3182	93.1667		36.9679	37.1613	36.8883
1837	2017-10-20	06:00:00		36.65		87.3077	96.3182	93.4545		36.9633	37.1192	36.87
1838	2017-10-20	06:30:00	105	36.31		87.8974	93.1818	94.6364		36.9494	37.0629	36.8233
1839	2017-10-20	07:00:00		36.76		87.8974	93	94.7		36.9448	37.035	36.8142
1840	2017-10-20	07:30:00		36.65		88.3684	93	95.3333		36.9402	36.9975	36.7867
1841	2017-10-20	08:00:00	78	36.54		88.1026	36.9554	93.7778		36.9402	36.9554	36.75
1842	2017-10-20	08:30:00	78	36.43		88.4103	91.0476	91.1111		36.9427	36.9183	36.7133
1843	2017-10-20	09:00:00	62	36.2		87.75	92.6667	88.1111		36.945	36.8717	36.6483
1844	2017-10-20	09:30:00		35.87		87.75	92.05	88.5		36.9242	36.8067	36.5558
1845	2017-10-20	10:00:00	77	36.2		87.875	90.9	86.375		36.9079	36.7458	36.4908
1846	2017-10-20	10:30:00	31	36.09		87.825	87.35	75.25		36.9008	36.6946	36.4258
1847	2017-10-20	11:00:00		36.31		87.3846	86.7895	74		36.9008	36.6571	36.3883
1848	2017-10-20	11:30:00	22	36.43		85.1026	36.6292	64.7143		36.9102	36.6292	36.37
1849	2017-10-20	12:00:00	153	36.09		86.8	86	75.75		36.9085	36.5967	36.3233
1850	2017-10-20	12:30:00	147	36.31		88.225	88.8947	81		36.8921	36.5733	36.3233
1851	2017-10-20	13:00:00		36.76		88	88.6111	81		36.8908	36.5687	36.3233
1852	2017-10-20	13:30:00		37.21		86.1316	88.5882	81		36.8938	36.5783	36.37
1853	2017-10-20	14:00:00		37.01		86.8108	88.375	81.4286		36.8896	36.5796	36.4092
1854	2017-10-20	14:30:00	56	36.31		86.2973	85.5	78.2857		36.8731	36.5562	36.3992
1855	2017-10-20	15:00:00	60	36.31		85.6053	36.5283	78		36.8731	36.5283	36.4083
1856	2017-10-20	15:30:00	93	36.31		87.4211	84.1875	79.875		36.8683	36.5004	36.445
1857	2017-10-20	16:00:00	96	36.43		89.2895	84.3125	82.25		36.8544	36.4775	36.4642
1858	2017-10-20	16:30:00	92	36.87		89.4474	82.5625	89.875		36.8473	36.4775	36.5292
1859	2017-10-20	17:00:00	97	37.18		89.3684	83.375	90.6667		36.8444	36.495	36.6017
1860	2017-10-20	17:30:00	166	37.32		92.9474	88.3125	106.667		36.8421	36.5229	36.6758
1861	2017-10-20	18:00:00	117	37.1		93.5641	90	102.667		36.8304	36.5417	36.76
1862	2017-10-20	18:30:00	94	37.46		91.5128	36.5896	96.7778		36.8262	36.5896	36.8558
1863	2017-10-20	19:00:00	96	37.43		91.4872	89.7222	96.7		36.8262	36.6175	36.9117
1864	2017-10-20	19:30:00	107	37.43		91.875	90.6316	97.6364		36.8237	36.65	36.93
1865	2017-10-20	20:00:00		37.21		91.7692	91.3333	97.6364		36.8167	36.6779	36.9467
1866	2017-10-20	20:30:00	24	36.43		89.7949	88.3333	94.7273		36.7981	36.6779	36.9567
1867	2017-10-20	21:00:00		36.98		91.4211	89.8824	98.2		36.791	36.7104	37.0125
1868	2017-10-20	21:30:00	110	37.55		91.5526	91	99.9		36.7935	36.7804	37.1158
1869	2017-10-20	22:00:00	89	37.55		91.2632	36.8367	99.2		36.7912	36.8367	37.2092
1870	2017-10-20	22:30:00	92	37.21		91	95.0556	99.2		36.789	36.8833	37.2375
1871	2017-10-20	23:00:00	87	36.79		90.7105	94.6316	98.2		36.7802	36.9033	37.205
1872	2017-10-20	23:30:00	83	36.87		90.2632	97.8421	89.9		36.7754	36.9217	37.1675
1873	2017-10-21	00:00:00	84	36.31		90.1053	94.2105	86.6		36.7637	36.9308	37.1017
1874	2017-10-21	00:30:00	77	36.54		89.7105	90.5263	84.9		36.7569	36.9404	37.025
1875	2017-10-21	01:00:00	76	36.76		89.2368	89.8	82.9		36.7546	36.9404	36.9692
1876	2017-10-21	01:30:00	84	36.76		89.1053	36.9217	80.6		36.75	36.9217	36.9133
1877	2017-10-21	02:00:00	83	36.65		88.8684	89.2273	80.8182		36.7431	36.9067	36.8667
1878	2017-10-21	02:30:00	83	36.54		88.3684	90.4545	86.1818		36.7362	36.9162	36.8758
1879	2017-10-21	03:00:00	86	36.65		88.2895	91.6364	86.1667		36.7294	36.9304	36.8483
1880	2017-10-21	03:30:00		36.65		88.3784	91.5714	84		36.7225	36.9446	36.7733
1881	2017-10-21	04:00:00		36.65		88.2222	91.35	83.5		36.7156	36.9537	36.6983
1882	2017-10-21	04:30:00	62	36.54		86.6111	89.85	80.5		36.7088	36.94	36.6425
1883	2017-10-21	05:00:00	70	36.54		86.2222	36.9133	78.8		36.7042	36.9133	36.6217
1884	2017-10-21	05:30:00	68	36.2		85.6944	83.6	77.3		36.6948	36.8667	36.5658
1885	2017-10-21	06:00:00	50	35.87		84.7297	80.25	73.9		36.6785	36.8154	36.5292
1886	2017-10-21	06:30:00	70	36.09		83.7838	79.05	73.2		36.674	36.7583	36.4917
1887	2017-10-21	07:00:00	42	36.43		82.6842	76.35	69.8		36.6671	36.7167	36.4642
1888	2017-10-21	07:30:00		36.43		82.6842	74.7368	68.2222		36.6625	36.675	36.4367
1889	2017-10-21	08:00:00	101	36.31		83.2895	76.05	70.2222		36.6577	36.6375	36.4083
1890	2017-10-21	08:30:00	68	36.2		83.0263	36.6279	68.5556		36.6529	36.6279	36.38
1891	2017-10-21	09:00:00	68	36.2		83.1842	77.7619	66.5556		36.6529	36.5954	36.3425
1892	2017-10-21	09:30:00	88	36.2		83.3077	76.7143	68.7		36.6598	36.5392	36.305
1893	2017-10-21	10:00:00	122	36.76		84.4615	78.2857	73.5455		36.6715	36.5063	36.3142
1894	2017-10-21	10:30:00	98	36.9		86.1795	78.5714	76.8182		36.6883	36.4933	36.3442
1895	2017-10-21	11:00:00	102	37.21		86.575	79.2857	79.7273		36.7071	36.5108	36.4
1896	2017-10-21	11:30:00	89	37.1		88.25	79.5714	81.6364		36.721	36.5204	36.475
1897	2017-10-21	12:00:00		37.43		86.5897	36.5671	84.8		36.749	36.5671	36.605
1898	2017-10-21	12:30:00		37.32		85	79.4737	86.4444		36.77	36.5996	36.7075
1899	2017-10-21	13:00:00	90	36.76		85.1282	80.2105	91.7778		36.77	36.5996	36.735
1900	2017-10-21	13:30:00	133	36.65		86.325	82.7895	95.9		36.7583	36.595	36.7533
1901	2017-10-21	14:00:00	97	36.54		86.5854	83.5263	95.5		36.7485	36.5904	36.7725
1902	2017-10-21	14:30:00	78	33.25		87.122	83.2632	96.5		36.6848	36.4533	36.5267
1903	2017-10-21	15:00:00	68	35.98		87.3171	82.3158	96.5		36.6779	36.4254	36.5083
1904	2017-10-21	15:30:00	110	36.65		87.7317	36.4254	98.7		36.685	36.4254	36.5458
1905	2017-10-21	16:00:00	115	36.09		88.1951	85.1905	98		36.6779	36.4021	36.49
1906	2017-10-21	16:30:00	125	37.21		89	88.1905	100.7		36.685	36.43	36.5158
1907	2017-10-21	17:00:00		37.32		88.8	89.1	100.556		36.6879	36.4625	36.525
1908	2017-10-21	17:30:00	94	37.32		87	90.4	101.111		36.6879	36.5092	36.5433
1909	2017-10-21	18:00:00	170	37.55		88.325	96.4	108		36.6973	36.5792	36.5533
1910	2017-10-21	18:30:00	87	37.55		88.15	97.25	106.091		36.6992	36.64	36.5725
1911	2017-10-21	19:00:00	96	37.55		88.15	36.6867	106.636		36.7017	36.6867	36.6383
1912	2017-10-21	19:30:00	93	37.66		87.8	99.619	103		36.7065	36.7379	36.7225
1913	2017-10-21	20:00:00	96	37.43		88	99.381	102.909		36.711	36.7846	36.7967
1914	2017-10-21	20:30:00	96	37.55		89.7561	100.714	104.545		36.7344	36.8408	37.155
1915	2017-10-21	21:00:00	101	37.43		90.0238	102.286	107.545		36.7437	36.8921	37.2758
1916	2017-10-21	21:30:00	105	37.66		89.9048	103.095	107.091		36.746	36.9529	37.36
1917	2017-10-21	22:00:00	105	37.66		90.2857	102.286	106.182		36.7483	36.9904	37.4908
1918	2017-10-21	22:30:00	104	37.55		90.5714	37.0175	104.273		36.7554	37.0175	37.5192
1919	2017-10-21	23:00:00	98	37.21		90.8333	102.381	103.75		36.7642	37.0175	37.51
1920	2017-10-21	23:30:00	104	37.38		91.3333	103.095	104.583		36.7748	37.0292	37.515
1921	2017-10-22	00:00:00	101	37.66		91.7381	103	98.8333		36.8029	37.0387	37.5242
1922	2017-10-22	00:30:00	96	37.55		92.1905	102.696	99.5833		36.824	37.0483	37.5242
1923	2017-10-22	01:00:00	101	37.1		92.7857	103.174	100		36.831	37.0625	37.4867
1924	2017-10-22	01:30:00	93	37.21		93	101.435	100		36.8404	37.0858	37.4492
1925	2017-10-22	02:00:00	100	37.1		93.4048	37.1092	100.333		36.8498	37.1092	37.4217
1926	2017-10-22	02:30:00	93	36.98		93.6429	102.217	100.083		36.859	37.2646	37.3742
1927	2017-10-22	03:00:00	91	37.21		93.7619	103.217	99.25		36.8706	37.3158	37.3558
1928	2017-10-22	03:30:00	91	37.21		93.6977	102.391	98.0833		36.8823	37.3392	37.3183
1929	2017-10-22	04:00:00	92	37.21		93.6591	101.391	97		36.894	37.3858	37.2808
1930	2017-10-22	04:30:00	89	36.65		94.2727	99.8261	95.75		36.8963	37.3625	37.2058
1931	2017-10-22	05:00:00	81	36.65		94.5227	99.0417	94.3333		36.8985	37.3346	37.1592
1932	2017-10-22	05:30:00	82	37.1		94.8409	37.3254	92.5		36.9173	37.3254	37.1358
1933	2017-10-22	06:00:00	79	37.18		95.5	94.75	90.6667		36.9446	37.31	37.0958
1934	2017-10-22	06:30:00	75	37.21		95.6136	94.25	88.9167		36.9679	37.2958	37.0675
1935	2017-10-22	07:00:00		37.12		96.8605	94.1739	87.8182		36.9823	37.2779	37.0692
1936	2017-10-22	07:30:00	66	36.87		96.1591	93	85.3636		36.9915	37.245	37.0408
1937	2017-10-22	08:00:00	76	36.65		95.5909	92.1304	83.1818		36.9985	37.2125	37.0033
1938	2017-10-22	08:30:00	159	36.54		97.6591	94.8696	89.1818		37.0056	37.1704	36.9667
1939	2017-10-22	09:00:00	76	36.31		97.8409	37.1237	87.8182		37.0079	37.1237	36.8917
1940	2017-10-22	09:30:00	107	36.43		98.2727	93.8696	89.2727		37.0127	37.0725	36.8267
1941	2017-10-22	10:00:00	65	36.43		96.9773	92.1304	86.8182		37.0058	37.0212	36.7617
1942	2017-10-22	10:30:00	102	36.31		97.0682	92.0435	88		36.9935	36.9696	36.7333
1943	2017-10-22	11:00:00	40	36.54		95.6591	89.5217	84.2727		36.9796	36.9417	36.7242
1944	2017-10-22	11:30:00	91	36.76		95.7045	88.9565	85.0909		36.9725	36.9158	36.6958
1945	2017-10-22	12:00:00	97	36.98		95.7333	88.7826	86.7273		36.9631	36.8875	36.6792
1946	2017-10-22	12:30:00	98	35.98		95.7826	36.8221	88.8182		36.9352	36.8221	36.5767
1947	2017-10-22	13:00:00	37	36.65		94.6304	86.087	84.5		36.9329	36.8033	36.5375
1948	2017-10-22	13:30:00		36.54		93.7778	85.7727	86.1818		36.9306	36.7754	36.51
1949	2017-10-22	14:00:00		35.43		93.7045	85.0952	87.2		36.9075	36.7058	36.4083
1950	2017-10-22	14:30:00	96	33.03		94.1136	85.2381	80.9		36.9029	36.5412	36.1158
1951	2017-10-22	15:00:00	50	35.76		93.7045	83.2857	78.3		36.8983	36.4808	36.07
1952	2017-10-22	15:30:00	96	35.98		93.3864	83.5238	77.2		36.8844	36.4296	36.0325
1953	2017-10-22	16:00:00	97	36.62		92.9773	36.405	80.4		36.8954	36.405	36.0483
1954	2017-10-22	16:30:00	102	37.21		92.4545	84.381	80.4		36.8954	36.4283	36.1233
1955	2017-10-22	17:00:00	107	37.32		92.7778	85.619	87.1		36.8954	36.4563	36.1883
1956	2017-10-22	17:30:00	113	37.43		93.2	87.0952	89.3		36.8977	36.47	36.2442
1957	2017-10-22	18:00:00	97	37.21		91.5778	87.9524	89.3		36.8906	36.4713	36.2633
1958	2017-10-22	18:30:00	92	37.66		91.6889	88.7619	88.7		36.8929	36.49	36.4033
1959	2017-10-22	19:00:00	91	37.15		91.5778	88.8636	94.1		36.8846	36.4913	36.445
1960	2017-10-22	19:30:00	86	36.98		91.4222	36.4958	93.3636		36.8704	36.4958	36.4817
1961	2017-10-22	20:00:00	104	36.43		91.6	91.0455	94.25		36.8496	36.4867	36.565
1962	2017-10-22	20:30:00	101	36.87		91.7111	88.4091	94.6667		36.8354	36.5004	36.885
1963	2017-10-22	21:00:00	88	37.32		91.4222	88.9545	97.8333		36.8331	36.5425	37.015
1964	2017-10-22	21:30:00	90	36.98		91.0889	88.1818	97.3333		36.819	36.5654	37.0983
1965	2017-10-22	22:00:00	91	36.76		90.7778	89.3636	96.8333		36.8002	36.5792	37.11
1966	2017-10-22	22:30:00	67	36.98		89.9556	87.7727	93.9167		36.7883	36.6071	37.0908
1967	2017-10-22	23:00:00	82	36.76		89.6	36.6163	91.8333		36.779	36.6163	37.0442
1968	2017-10-22	23:30:00	87	36.76		89.2222	89.5	89.6667		36.766	36.6163	36.9883
1969	2017-10-23	00:00:00	84	36.65		88.8444	88.9091	88.5833		36.745	36.6025	36.9417
1970	2017-10-23	00:30:00	94	36.62		88.8	88.7273	88.75		36.7256	36.6292	36.855
1971	2017-10-23	01:00:00	62	36.65		87.9333	89.8636	86.3333		36.7162	36.6292	36.8133
1972	2017-10-23	01:30:00	74	36.76		87.5111	89.1739	85.3333		36.7069	36.6383	36.795
1973	2017-10-23	02:00:00	81	36.87		87.0889	88.8333	83.4167		36.7021	36.6983	36.8317
1974	2017-10-23	02:30:00	82	36.96		86.8444	36.8621	81.8333		36.7017	36.8621	36.8392
1975	2017-10-23	03:00:00	70	37.07		86.3778	89.0833	80.3333		36.6987	36.9167	36.8183
1976	2017-10-23	03:30:00	77	36.98		86.0667	88.2917	79.25		36.694	36.9583	36.8183
1977	2017-10-23	04:00:00	48	36.65		85.0889	86.25	75.6667		36.6823	36.9596	36.8092
1978	2017-10-23	04:30:00	75	36.59		84.7778	85.125	76.3333		36.681	36.9338	36.7767
1979	2017-10-23	05:00:00	42	36.65		83.9111	82.4167	73		36.681	36.9058	36.7675
1980	2017-10-23	05:30:00	45	36.65		83.0889	79.5833	69.5		36.6717	36.8733	36.7583
1981	2017-10-23	06:00:00	45	36.54		82.3333	36.8454	66.25		36.6583	36.8454	36.7492
1982	2017-10-23	06:30:00	41	36.56		81.5778	75.2917	61.8333		36.6448	36.7996	36.7442
1983	2017-10-23	07:00:00	83	35.65		81.6087	74.9583	63.5833		36.6142	36.7371	36.6608
1984	2017-10-23	07:30:00	22	35.43		80.6522	72.2917	59.25		36.5842	36.6725	36.55
1985	2017-10-23	08:00:00	21	35.1		79.4565	68.8333	54.25		36.5519	36.6171	36.4025
1986	2017-10-23	08:30:00	60	35.65		77.3043	67.125	52.4167		36.5333	36.5662	36.2933
1987	2017-10-23	09:00:00	64	35.87		77.0435	66.125	51.9167		36.5242	36.5058	36.1933
1988	2017-10-23	09:30:00	156	36.09		78.1087	36.4687	58.5		36.5171	36.4687	36.1192
1989	2017-10-23	10:00:00	104	36.09		78.9565	69.4167	63.1667		36.51	36.4408	36.0725
1990	2017-10-23	10:30:00	74	36.43		78.3478	69.7083	63.0833		36.5125	36.4179	36.0592
1991	2017-10-23	11:00:00	170	36.2		81.1739	73.375	73.75		36.5054	36.3946	36.0217
1992	2017-10-23	11:30:00	88	35.54		81.1087	73.4167	77.3333		36.48	36.3437	35.9292
1993	2017-10-23	12:00:00	131	35.87		81.8478	75.375	84.5		36.4569	36.3112	35.8733
1994	2017-10-23	12:30:00	61	36.54		81.0435	74	86.1667		36.4685	36.3079	35.8717
1995	2017-10-23	13:00:00	80	35.93		81.9783	36.2779	85.9167		36.4535	36.2779	35.895
1996	2017-10-23	13:30:00	42	35.54		81.1277	73.4167	87.5833		36.4327	36.2271	35.9042
1997	2017-10-23	14:00:00	28	35.76		80.0208	71.2083	88.1667		36.4396	36.1808	35.9592
1998	2017-10-23	14:30:00	84	35.87		79.7708	71.2917	90.1667		36.4987	36.1354	35.9775
1999	2017-10-23	15:00:00	92	35.98		80.6458	72.2083	92.5		36.5033	36.09	35.9867
[truncated: 9,732 more rows]

## Sheet: No.17
No	Date	Time	Heart rate(bpm)	body temperture		HR 24h average	HR 12h average	HR 6h average		Tb 24h average	Tb 12h average	Tb 6h average
1	2017-11-05	00:00:00	35	35.75
2	2017-11-05	00:30:00	82	36.09
3	2017-11-05	01:00:00	36	35.87
4	2017-11-05	01:30:00	72	35.98
5	2017-11-05	02:00:00	36	36.39
6	2017-11-05	02:30:00	69	36.65
7	2017-11-05	03:00:00	46	36.65
8	2017-11-05	03:30:00	82	35.87
9	2017-11-05	04:00:00	61	36.09
10	2017-11-05	04:30:00	32	36.09
11	2017-11-05	05:00:00	33	35.31
12	2017-11-05	05:30:00	38	35.87				51.8333				36.0508
13	2017-11-05	06:00:00	89	36.31				56.3333				36.0975
14	2017-11-05	06:30:00	166	35.75				63.3333				36.0692
15	2017-11-05	07:00:00	55	36.2				64.9167				36.0967
16	2017-11-05	07:30:00	182	36.12				74.0833				36.1083
17	2017-11-05	08:00:00		36.42				77.5455				36.1108
18	2017-11-05	08:30:00	147	36.53				84.6364				36.1008
19	2017-11-05	09:00:00	79	36.53				87.6364				36.0908
20	2017-11-05	09:30:00	80	36.65				87.4545				36.1558
21	2017-11-05	10:00:00	97	36.73				90.7273				36.2092
22	2017-11-05	10:30:00	67	36.65				93.9091				36.2558
23	2017-11-05	11:00:00	91	36.09				99.1818				36.3208
24	2017-11-05	11:30:00	84	36.28			76.4783	103.364			36.2029	36.355
25	2017-11-05	12:00:00	115	36.2			79.9565	105.727			36.2217	36.3458
26	2017-11-05	12:30:00	70	32.05			79.4348	97			36.0533	36.0375
27	2017-11-05	13:00:00	104	34.11			82.3913	101.455			35.98	35.8633
28	2017-11-05	13:30:00	105	35.75			83.8261	94.4545			35.9704	35.8325
29	2017-11-05	14:00:00	90	36.31			86.1739	94.0833			35.9671	35.8233
30	2017-11-05	14:30:00	92	36.53			87.1739	89.5			35.9621	35.8233
31	2017-11-05	15:00:00	88	36.76			89	90.25			35.9667	35.8425
32	2017-11-05	15:30:00	102	36.42			89.8696	92.0833			35.9896	35.8233
33	2017-11-05	16:00:00	101	36.31			91.6087	92.4167			35.9988	35.7883
34	2017-11-05	16:30:00	92	36.42			94.2174	94.5			36.0125	35.7692
35	2017-11-05	17:00:00	81	36.53			96.3043	93.6667			36.0633	35.8058
36	2017-11-05	17:30:00	92	36.87			98.6522	94.3333			36.105	35.855
37	2017-11-05	18:00:00	91	37.09			98.7391	92.3333			36.1375	35.9292
38	2017-11-05	18:30:00	113	37.66			96.4348	95.9167			36.2171	36.3967
39	2017-11-05	19:00:00	81	36.98			97.5652	94			36.2496	36.6358
40	2017-11-05	19:30:00	89	36.76			93.5217	92.6667			36.2762	36.72
41	2017-11-05	20:00:00	67	37.21			92.4167	90.75			36.3092	36.795
42	2017-11-05	20:30:00	87	37.09			89.9167	90.3333			36.3325	36.8417
43	2017-11-05	21:00:00	71	37.43			89.5833	88.9167			36.37	36.8975
44	2017-11-05	21:30:00	75	37.43			89.375	86.6667			36.4025	36.9817
45	2017-11-05	22:00:00	86	37.43			88.9167	85.4167			36.4317	37.075
46	2017-11-05	22:30:00	80	37.43			89.4583	84.4167			36.4642	37.1592
47	2017-11-05	23:00:00	78	37.32			88.9167	84.1667			36.5154	37.225
48	2017-11-05	23:30:00	86	37.12		82.8723	89	83.6667		36.3767	36.5504	37.2458
49	2017-11-06	00:00:00	75	37.29		83.7234	87.3333	82.3333		36.4087	36.5958	37.2625
50	2017-11-06	00:30:00	83	37.21		83.7447	87.875	79.8333		36.4321	36.8108	37.225
51	2017-11-06	01:00:00	77	37.21		84.617	86.75	79.5		36.46	36.94	37.2442
52	2017-11-06	01:30:00	67	37.21		84.5106	85.1667	77.6667		36.4856	37.0008	37.2817
53	2017-11-06	02:00:00	78	36.98		85.4043	84.6667	78.5833		36.4979	37.0287	37.2625
54	2017-11-06	02:30:00	76	36.65		85.5532	84	77.6667		36.4979	37.0338	37.2258
55	2017-11-06	03:00:00	70	36.65		86.0638	83.25	77.5833		36.4979	37.0292	37.1608
56	2017-11-06	03:30:00	65	36.87		85.7021	81.7083	76.75		36.5188	37.0479	37.1142
57	2017-11-06	04:00:00	55	36.95		85.5745	79.7917	74.1667		36.5367	37.0746	37.0742
58	2017-11-06	04:30:00	87	37.04		86.7447	79.5833	74.75		36.5565	37.1004	37.0417
59	2017-11-06	05:00:00	71	37.07		87.5532	79.1667	74.1667		36.5931	37.1229	37.0208
60	2017-11-06	05:30:00	77	36.98		88.383	78.5417	73.4167		36.6163	37.1275	37.0092
61	2017-11-06	06:00:00	75	36.98		88.0851	77.875	73.4167		36.6302	37.1229	36.9833
62	2017-11-06	06:30:00	77	36.98		86.1915	76.375	72.9167		36.6558	37.0946	36.9642
63	2017-11-06	07:00:00	78	36.65		86.6809	76.25	73		36.6652	37.0808	36.9175
64	2017-11-06	07:30:00	41	36.53		83.6809	74.25	70.8333		36.6737	37.0712	36.8608
65	2017-11-06	08:00:00	62	36.65		83.2292	74.0417	69.5		36.6785	37.0479	36.8333
66	2017-11-06	08:30:00	78	36.42		81.7917	73.6667	69.6667		36.6763	37.02	36.8142
67	2017-11-06	09:00:00	69	36.53		81.5833	73.5833	69.5833		36.6763	36.9825	36.8042
68	2017-11-06	09:30:00	54	36.53		81.0417	72.7083	68.6667		36.6738	36.945	36.7758
69	2017-11-06	10:00:00	62	36.87		80.3125	71.7083	69.25		36.6767	36.9217	36.7692
70	2017-11-06	10:30:00	91	36.76		80.8125	72.1667	69.5833		36.679	36.8937	36.7458
71	2017-11-06	11:00:00		36.42		80.5957	71.913	69.4545		36.6858	36.8562	36.6917
72	2017-11-06	11:30:00	70	36.98		80.2979	71.2174	68.8182		36.7004	36.8504	36.6917
73	2017-11-06	12:00:00	50	36.09		78.9149	70.1304	66.5455		36.6981	36.8004	36.6175
74	2017-11-06	12:30:00	97	36.53		79.4894	70.7391	68.3636		36.7915	36.7721	36.58
75	2017-11-06	13:00:00	94	37.09		79.2766	71.4783	69.8182		36.8535	36.7671	36.6167
76	2017-11-06	13:30:00	81	35.87		78.766	72.087	73.4545		36.856	36.7112	36.5617
77	2017-11-06	14:00:00	87	36.87		78.7021	72.4783	75.7273		36.8677	36.7067	36.58
78	2017-11-06	14:30:00	96	36.65		78.7872	73.3478	77.3636		36.8702	36.7067	36.5992
79	2017-11-06	15:00:00	94	36.76		78.9149	74.3913	79.6364		36.8702	36.7112	36.6183
80	2017-11-06	15:30:00	96	36.87		78.7872	75.7391	83.4545		36.8796	36.7112	36.6467
81	2017-11-06	16:00:00	90	36.98		78.5532	77.2609	86		36.8935	36.7125	36.6558
82	2017-11-06	16:30:00	96	36.87		78.6383	77.6522	86.4545		36.9029	36.7054	36.665
83	2017-11-06	17:00:00	111	36.98		79.2766	79.3913	88.5		36.9123	36.7017	36.7117
84	2017-11-06	17:30:00	93	36.98		79.2979	80.087	90.4167		36.9146	36.7017	36.7117
85	2017-11-06	18:00:00	92	36.79		79.3191	80.8261	93.9167		36.9083	36.6938	36.77
86	2017-11-06	18:30:00	85	36.53		78.7234	81.1739	92.9167		36.8848	36.675	36.77
87	2017-11-06	19:00:00	78	36.98		78.6596	81.1739	91.5833		36.8848	36.6888	36.7608
88	2017-11-06	19:30:00	93	37.09		78.7447	83.4348	92.5833		36.8917	36.7121	36.8625
89	2017-11-06	20:00:00	92	36.98		79.2766	84.7391	93		36.8869	36.7258	36.8717
90	2017-11-06	20:30:00	111	36.76		79.7872	86.1739	94.25		36.88	36.74	36.8808
91	2017-11-06	21:00:00	82	36.76		80.0213	86.7391	93.25		36.866	36.7496	36.8808
92	2017-11-06	21:30:00	74	36.65		80	87.6087	91.4167		36.8498	36.7546	36.8625
93	2017-11-06	22:00:00	100	36.31		80.2979	89.2609	92.25		36.8265	36.7312	36.8067
94	2017-11-06	22:30:00	78	36.76		80.2553	88.6957	90.75		36.8125	36.7312	36.7975
95	2017-11-06	23:00:00	83	36.87		80.3617	88.4583	88.4167		36.8031	36.75	36.7883
96	2017-11-06	23:30:00	71	36.53		80.0426	88.5	86.5833		36.7908	36.7313	36.7508
97	2017-11-07	00:00:00	72	36.65		79.9787	89.4167	84.9167		36.7775	36.7546	36.7392
98	2017-11-07	00:30:00	74	36.87		79.7872	88.4583	84		36.7704	36.7688	36.7675
99	2017-11-07	01:00:00	72	36.87		79.6809	87.5417	83.5		36.7633	36.7596	36.7583
100	2017-11-07	01:30:00	81	36.87		79.9787	87.5417	82.5		36.7562	36.8013	36.74
101	2017-11-07	02:00:00	76	37.09		79.9362	87.0833	81.1667		36.7585	36.8104	36.7492
102	2017-11-07	02:30:00	73	37.09		79.8723	86.125	78		36.7677	36.8287	36.7767
103	2017-11-07	03:00:00	53	37.09		79.5106	84.4167	75.5833		36.7769	36.8425	36.8042
104	2017-11-07	03:30:00	52	37.07		79.234	82.5833	73.75		36.781	36.8508	36.8392
105	2017-11-07	04:00:00	68	36.76		79.5106	81.6667	71.0833		36.7771	36.8417	36.8767
106	2017-11-07	04:30:00	49	36.87		78.7021	79.7083	68.6667		36.7735	36.8417	36.8858
107	2017-11-07	05:00:00	72	36.87		78.7234	78.0833	67.75		36.7694	36.8371	36.8858
108	2017-11-07	05:30:00	43	36.87		78	76	65.4167		36.7671	36.8325	36.9142
109	2017-11-07	06:00:00	51	36.67		77.4894	74.2917	63.6667		36.7606	36.8275	36.9158
110	2017-11-07	06:30:00	65	36.76		77.234	73.4583	62.9167		36.756	36.8371	36.9067
111	2017-11-07	07:00:00	41	36.76		76.4468	71.9167	60.3333		36.7583	36.8279	36.8975
112	2017-11-07	07:30:00	94	36.76		77.5745	71.9583	61.4167		36.7631	36.8142	36.8883
113	2017-11-07	08:00:00	59	36.84		77.5106	70.5833	60		36.7671	36.8083	36.8675
114	2017-11-07	08:30:00	58	36.76		77.0851	68.375	58.75		36.7742	36.8083	36.84
115	2017-11-07	09:00:00	83	36.31		77.383	68.4167	61.25		36.7696	36.7896	36.775
116	2017-11-07	09:30:00	58	36.56		77.4681	67.75	61.75		36.7702	36.7858	36.7325
117	2017-11-07	10:00:00	64	36.42		77.5106	66.25	61.4167		36.7608	36.7904	36.7042
118	2017-11-07	10:30:00	60	36.53		76.8511	65.5	62.3333		36.756	36.7808	36.6758
119	2017-11-07	11:00:00	86	36.65		77.0417	65.625	63.5		36.7608	36.7717	36.6575
120	2017-11-07	11:30:00	87	36.42		77.3958	66.2917	67.1667		36.7492	36.7671	36.62
121	2017-11-07	12:00:00	86	36.56		78.1458	66.875	70.0833		36.759	36.7633	36.6108
122	2017-11-07	12:30:00	92	36.53		78.0417	67.625	72.3333		36.759	36.7492	36.5917
123	2017-11-07	13:00:00	111	36.76		78.3958	69.25	78.1667		36.7521	36.7446	36.5917
124	2017-11-07	13:30:00	97	37.09		78.7292	69.9167	78.4167		36.7775	36.7537	36.6192
125	2017-11-07	14:00:00	100	36.98		79	70.9167	81.8333		36.7798	36.7492	36.6308
126	2017-11-07	14:30:00	21	36.65		77.4375	68.75	78.75		36.7798	36.7308	36.6217
127	2017-11-07	15:00:00	46	35.53		76.4375	68.4583	75.6667		36.7542	36.6658	36.5567
128	2017-11-07	15:30:00	120	36.09		76.9375	71.2917	80.8333		36.7379	36.625	36.5175
129	2017-11-07	16:00:00	187	36.87		78.9583	76.25	91.0833		36.7356	36.6296	36.555
130	2017-11-07	16:30:00	105	36.98		79.1458	78.5833	94.8333		36.7379	36.6342	36.5925
131	2017-11-07	17:00:00	91	36.98		78.7292	79.375	95.25		36.7379	36.6388	36.62
132	2017-11-07	17:30:00	110	36.98		79.0833	82.1667	97.1667		36.7379	36.6433	36.6667
133	2017-11-07	18:00:00	101	37.21		79.2708	84.25	98.4167		36.7467	36.6658	36.7208
134	2017-11-07	18:30:00	105	36.98		79.6875	85.9167	99.5		36.756	36.675	36.7583
135	2017-11-07	19:00:00	84	37.21		79.8125	87.7083	97.25		36.7608	36.6938	36.7958
136	2017-11-07	19:30:00	88	37.21		79.7083	87.4583	96.5		36.7633	36.7125	36.8058
137	2017-11-07	20:00:00	78	37.09		79.4167	88.25	94.6667		36.7656	36.7229	36.815
138	2017-11-07	20:30:00	90	36.98		78.9792	89.5833	100.417		36.7702	36.7321	36.8425
139	2017-11-07	21:00:00	78	37.09		78.8958	89.375	103.083		36.7771	36.7646	36.9725
140	2017-11-07	21:30:00	90	36.76		79.2292	90.7083	100.583		36.7794	36.7729	37.0283
141	2017-11-07	22:00:00	82	36.98		78.8542	91.4583	91.8333		36.7933	36.7963	37.0375
142	2017-11-07	22:30:00	102	36.76		79.3542	93.2083	91.5833		36.7933	36.8058	37.0192
143	2017-11-07	23:00:00	82	37.09		79.3333	93.0417	90.8333		36.7979	36.8242	37.0283
144	2017-11-07	23:30:00	80	37.21		79.5208	92.75	88.3333		36.8121	36.8571	37.0475
145	2017-11-08	00:00:00	78	36.98		79.6458	92.4167	86.4167		36.819	36.8746	37.0283
146	2017-11-08	00:30:00	72	36.98		79.6042	91.5833	83.6667		36.8212	36.8933	37.0283
147	2017-11-08	01:00:00	96	36.87		80.1042	90.9583	84.6667		36.8212	36.8979	37
148	2017-11-08	01:30:00	75	36.53		79.9792	90.0417	83.5833		36.8142	36.8746	36.9433
149	2017-11-08	02:00:00	66	36.65		79.7708	88.625	82.5833		36.805	36.8608	36.9067
150	2017-11-08	02:30:00	78	36.53		79.875	91	81.5833		36.7933	36.8558	36.8692
151	2017-11-08	03:00:00	78	36.76		80.3958	92.3333	81.5833		36.7865	36.9071	36.8417
152	2017-11-08	03:30:00	67	36.9		80.7083	90.125	79.6667		36.7829	36.9408	36.8533
153	2017-11-08	04:00:00	80	36.87		80.9583	85.6667	79.5		36.7852	36.9408	36.8442
154	2017-11-08	04:30:00	68	36.87		81.3542	84.125	76.6667		36.7852	36.9363	36.8533
155	2017-11-08	05:00:00	72	36.76		81.3542	83.3333	75.8333		36.7829	36.9271	36.8258
156	2017-11-08	05:30:00	65	36.87		81.8125	81.4583	74.5833		36.7829	36.9225	36.7975
157	2017-11-08	06:00:00	68	36.93		82.1667	80.0833	73.75		36.7883	36.9108	36.7933
158	2017-11-08	06:30:00	68	36.87		82.2292	78.5417	73.4167		36.7906	36.9062	36.7842
159	2017-11-08	07:00:00	57	36.87		82.5625	77.4167	70.1667		36.7929	36.8921	36.7842
160	2017-11-08	07:30:00	43	36.42		81.5	75.5417	67.5		36.7858	36.8592	36.775
161	2017-11-08	08:00:00	68	36.53		81.6875	75.125	67.6667		36.7794	36.8358	36.765
162	2017-11-08	08:30:00	57	36.53		81.6667	73.75	65.9167		36.7746	36.8171	36.765
163	2017-11-08	09:00:00	71	36.65		81.4167	73.4583	65.3333		36.7817	36.7987	36.7558
164	2017-11-08	09:30:00	72	36.53		81.7083	72.7083	65.75		36.781	36.7892	36.725
165	2017-11-08	10:00:00		37.09		82.0851	72.3043	64.4545		36.795	36.7937	36.7433
166	2017-11-08	10:30:00	82	36.9		82.5532	71.4348	65.7273		36.8027	36.7996	36.7458
167	2017-11-08	11:00:00	107	36.87		83	72.5217	68.9091		36.8073	36.7904	36.755
168	2017-11-08	11:30:00	93	36.87		83.1277	73.087	71.4545		36.8167	36.7762	36.755
169	2017-11-08	12:00:00	91	37.07		83.234	73.6522	73.5455		36.8273	36.78	36.7667
170	2017-11-08	12:30:00	63	36.76		82.617	73.2609	73.0909		36.8321	36.7708	36.7575
171	2017-11-08	13:00:00	91	36.53		82.1915	73.0435	76.1818		36.8273	36.7567	36.7292
172	2017-11-08	13:30:00	102	36.65		82.2979	74.2174	81.5455		36.8181	36.7617	36.7483
173	2017-11-08	14:00:00	65	36.65		81.5532	74.1739	81.2727		36.8112	36.7617	36.7583
174	2017-11-08	14:30:00		36.98		82.8696	74	83.7		36.8181	36.7804	36.7958
175	2017-11-08	15:00:00	78	37.09		83.5652	74	84.4		36.8506	36.7942	36.8325
176	2017-11-08	15:30:00	86	36.98		82.8261	74.8636	85.8		36.8692	36.7975	36.87
177	2017-11-08	16:00:00	89	36.87		80.6957	75.2727	86.0909		36.8692	36.7975	36.8517
178	2017-11-08	16:30:00	93	36.98		80.4348	76.4091	87.0909		36.8692	36.8021	36.8583
179	2017-11-08	17:00:00	94	36.87		80.5	77.4091	85.9091		36.8669	36.8067	36.8583
180	2017-11-08	17:30:00	98	36.98		80.2391	78.9091	86.3636		36.8669	36.8113	36.8675
181	2017-11-08	18:00:00	93	36.76		80.0652	80.0455	86.5455		36.8575	36.8042	36.8417
182	2017-11-08	18:30:00	75	36.98		79.413	80.3636	87.6364		36.8575	36.8088	36.86
183	2017-11-08	19:00:00	71	36.76		79.1304	81	85.8182		36.8481	36.8042	36.8792
184	2017-11-08	19:30:00	65	36.87		78.6304	82	82.4545		36.841	36.8229	36.8975
185	2017-11-08	20:00:00	78	36.98		78.6304	82.4545	83.6364		36.8387	36.8417	36.925
186	2017-11-08	20:30:00	79	36.73		78.3913	83.4545	83.25		36.8335	36.85	36.9042
187	2017-11-08	21:00:00	80	36.76		78.4348	83.8636	83.4167		36.8267	36.8546	36.8767
188	2017-11-08	21:30:00	110	36.53		78.8696	85.5909	85.4167		36.8219	36.8546	36.8392
189	2017-11-08	22:00:00	96	36.53		79.1739	86.0435	86		36.8125	36.8313	36.8108
190	2017-11-08	22:30:00	40	36.53		77.8261	84.2174	81.5833		36.8077	36.8158	36.7733
191	2017-11-08	23:00:00	105	36.65		78.3261	84.1304	82.5		36.7985	36.8067	36.755
192	2017-11-08	23:30:00	58	36.87		77.8478	82.6087	79.1667		36.7915	36.8067	36.7458
193	2017-11-09	00:00:00	89	36.87		78.087	82.5217	78.8333		36.7892	36.7983	36.755
194	2017-11-09	00:30:00	80	36.98		78.2609	83.2609	79.25		36.7892	36.8075	36.755
195	2017-11-09	01:00:00	76	36.98		77.8261	82.6087	79.6667		36.7915	36.8262	36.7733
196	2017-11-09	01:30:00	70	36.87		77.7174	81.2174	80.0833		36.7985	36.8354	36.7733
197	2017-11-09	02:00:00	79	36.87		78	81.8261	80.1667		36.8031	36.8446	36.7642
198	2017-11-09	02:30:00	58	36.87		77.5652	80.8333	78.4167		36.8102	36.84	36.7758
199	2017-11-09	03:00:00	66	36.87		77.3043	80.3333	77.25		36.8125	36.8308	36.785
200	2017-11-09	03:30:00	72	36.87		77.413	79.75	74.0833		36.8119	36.8263	36.8133
201	2017-11-09	04:00:00	69	36.87		77.1739	78.9167	71.8333		36.8119	36.8262	36.8417
202	2017-11-09	04:30:00	81	36.98		77.4565	78.4167	75.25		36.8142	36.8263	36.8792
203	2017-11-09	05:00:00	76	36.98		77.5435	77.6667	72.8333		36.8187	36.8308	36.9067
204	2017-11-09	05:30:00	51	36.98		77.2391	75.7083	72.25		36.821	36.8308	36.9158
205	2017-11-09	06:00:00	72	36.87		77.3261	74.8333	70.8333		36.8198	36.8354	36.9158
206	2017-11-09	06:30:00	56	36.87		77.0652	74.0417	68.8333		36.8198	36.8308	36.9067
207	2017-11-09	07:00:00	85	36.76		77.6739	74.625	69.5833		36.8175	36.8308	36.8883
208	2017-11-09	07:30:00	49	36.93		77.8043	73.9583	67.8333		36.8281	36.8333	36.8933
209	2017-11-09	08:00:00	85	36.65		78.1739	74.25	68.3333		36.8306	36.8196	36.875
210	2017-11-09	08:30:00	85	37.09		78.7826	74.5	70.5833		36.8423	36.8346	36.8933
211	2017-11-09	09:00:00	66	36.87		78.6739	73.9167	70.5833		36.8469	36.8392	36.8933
212	2017-11-09	09:30:00	85	36.76		78.9565	72.875	71.6667		36.8517	36.8488	36.8842
213	2017-11-09	10:00:00	104	36.76		79.4894	73.2083	74.5833		36.8448	36.8583	36.875
214	2017-11-09	10:30:00	46	36.65		78.7234	73.4583	71.6667		36.8396	36.8633	36.8475
215	2017-11-09	11:00:00	78	36.98		78.1064	72.3333	71.8333		36.8419	36.8771	36.8475
216	2017-11-09	11:30:00	87	37.01		77.9787	73.5417	74.8333		36.8448	36.8829	36.85
217	2017-11-09	12:00:00	101	36.84		78.1915	74.0417	77.25		36.84	36.8817	36.8475
218	2017-11-09	12:30:00		36.81		78.5217	73.7826	79.1818		36.841	36.8746	36.8425
219	2017-11-09	13:00:00	63	36.65		77.913	73.2174	77.1818		36.8435	36.8608	36.8333
220	2017-11-09	13:30:00	52	36.98		76.8261	72.4348	77.4545		36.8504	36.8654	36.8375
221	2017-11-09	14:00:00	81	36.79		77.1739	72.5217	77.0909		36.8533	36.8621	36.8492
222	2017-11-09	14:30:00	93	37.09		77.5106	74.0435	77.8182		36.8556	36.8712	36.8492
223	2017-11-09	15:00:00	50	37.09		76.9149	73.3478	76.3636		36.8556	36.8804	36.8675
224	2017-11-09	15:30:00	110	36.76		77.4255	75	78.6364		36.851	36.8758	36.8675
225	2017-11-09	16:00:00	21	37.32		75.9787	72.913	71.0909		36.8604	36.8946	36.9142
226	2017-11-09	16:30:00		37.32		75.6087	72.5455	73.6		36.8675	36.9088	36.97
227	2017-11-09	17:00:00	136	36.9		76.5217	75.2727	79.4		36.8681	36.9054	36.9633
228	2017-11-09	17:30:00	98	37.09		76.5217	77.4091	80.5		36.8704	36.91	36.97
229	2017-11-09	18:00:00	97	37.09		76.6087	78.5455	80.1		36.8773	36.9192	36.9908
230	2017-11-09	18:30:00	101	36.87		77.1739	80.5909	82		36.875	36.9192	36.9958
231	2017-11-09	19:00:00	78	36.65		77.3261	80.2727	83.3636		36.8727	36.9146	36.9958
232	2017-11-09	19:30:00	79	36.42		77.6304	81.6364	85.8182		36.8633	36.8933	36.9492
233	2017-11-09	20:00:00	78	36.59		77.6304	81.3182	85.5455		36.8552	36.8908	36.9325
234	2017-11-09	20:30:00	93	36.76		77.9348	81.6818	85.5455		36.8558	36.8771	36.905
235	2017-11-09	21:00:00	88	36.76		78.1087	82.6818	89		36.8558	36.8725	36.8775
236	2017-11-09	21:30:00	72	36.76		77.2826	82.0909	85.5455		36.8606	36.8725	36.8775
237	2017-11-09	22:00:00	96	36.53		77.2826	81.7273	92.3636		36.8606	36.8629	36.8117
238	2017-11-09	22:30:00	86	36.76		78.2826	83.5455	91.8333		36.8654	36.8675	36.765
239	2017-11-09	23:00:00	80	36.87		77.7391	83.6364	87.1667		36.87	36.8629	36.7625
240	2017-11-09	23:30:00	81	36.87		78.2391	83.3636	85.75		36.87	36.8571	36.7442
241	2017-11-10	00:00:00	77	36.87		77.9783	82.2727	84.0833		36.87	36.8583	36.7258
242	2017-11-10	00:30:00	64	36.87		77.6304	81.4783	81		36.8677	36.8608	36.7258
243	2017-11-10	01:00:00	88	36.87		77.8913	82.5652	81.8333		36.8654	36.87	36.7442
244	2017-11-10	01:30:00	92	36.87		78.3696	84.3043	82.9167		36.8654	36.8654	36.7817
245	2017-11-10	02:00:00	73	36.87		78.2391	83.9565	82.5		36.8654	36.8687	36.805
246	2017-11-10	02:30:00	81	36.76		78.7391	83.4348	81.5		36.8631	36.855	36.805
247	2017-11-10	03:00:00	59	36.76		78.587	83.8261	79.0833		36.8608	36.8412	36.805
248	2017-11-10	03:30:00	53	36.87		78.1739	81.3478	77.5		36.8608	36.8458	36.8142
249	2017-11-10	04:00:00	83	36.98		78.4783	84.0435	76.4167		36.8631	36.8317	36.8517
250	2017-11-10	04:30:00	56	36.98		77.9348	82.875	73.9167		36.8631	36.8175	36.87
251	2017-11-10	05:00:00	53	36.87		77.4348	79.4167	71.6667		36.8608	36.8163	36.87
252	2017-11-10	05:30:00	68	36.76		77.8043	78.1667	70.5833		36.8562	36.8025	36.8608
253	2017-11-10	06:00:00	41	36.87		77.1304	75.8333	67.5833		36.8562	36.7933	36.8608
254	2017-11-10	06:30:00	75	36.87		77.5435	74.75	68.5		36.8562	36.7933	36.8608
255	2017-11-10	07:00:00	70	36.76		77.2174	74.4167	67		36.8562	36.7979	36.8517
256	2017-11-10	07:30:00	68	36.76		77.6304	73.9583	65		36.8527	36.8121	36.8425
257	2017-11-10	08:00:00	72	36.87		77.3478	73.7083	64.9167		36.8573	36.8238	36.8425
258	2017-11-10	08:30:00	68	36.87		76.9783	72.6667	63.8333		36.8527	36.8283	36.8517
259	2017-11-10	09:00:00	39	36.98		76.3913	70.625	62.1667		36.855	36.8375	36.87
260	2017-11-10	09:30:00	87	36.45		76.4348	71.25	65		36.8485	36.8246	36.835
261	2017-11-10	10:00:00	78	36.87		75.8696	70.5	64.5833		36.8508	36.8388	36.8258
262	2017-11-10	10:30:00	78	36.98		76.5652	70.1667	66.4167		36.8577	36.8479	36.8258
263	2017-11-10	11:00:00	153	36.98		78.1957	73.2083	74.75		36.8577	36.8525	36.835
264	2017-11-10	11:30:00	94	36.76		78.3478	73.75	76.9167		36.8525	36.8479	36.835
265	2017-11-10	12:00:00	102	36.79		78.3696	74.7917	82		36.8515	36.8446	36.8283
266	2017-11-10	12:30:00	79	36.87		78.383	75.4167	82.3333		36.8527	36.8446	36.8283
267	2017-11-10	13:00:00	92	36.87		79	75.5833	84.1667		36.8573	36.8446	36.8375
268	2017-11-10	13:30:00	84	36.65		79.6809	75.25	85.5		36.8504	36.8354	36.8283
269	2017-11-10	14:00:00		36.7		79.6522	75.3478	86.7273		36.8485	36.8283	36.8142
270	2017-11-10	14:30:00	75	36.42		79.2609	75.087	87.3636		36.8346	36.8142	36.7767
271	2017-11-10	15:00:00	119	36.87		80.7609	77.6957	94.6364		36.83	36.8188	36.7675
272	2017-11-10	15:30:00	86	37.09		80.2391	79.1304	94.5455		36.8369	36.8279	36.8208
273	2017-11-10	16:00:00	100	37.09		81.9565	79.8696	96.5455		36.8321	36.8325	36.8392
274	2017-11-10	16:30:00	90	37.09		82.1277	81.3478	97.6364		36.8273	36.8371	36.8483
275	2017-11-10	17:00:00	92	36.98		81.1915	83.0435	92.0909		36.829	36.8417	36.8483
276	2017-11-10	17:30:00	91	36.98		81.0426	84.0435	91.8182		36.8267	36.8508	36.8667
277	2017-11-10	18:00:00	94	36.98		80.9787	86.3478	91.0909		36.8244	36.8554	36.8825
278	2017-11-10	18:30:00	105	36.98		81.0638	87.6522	93.4545		36.8267	36.86	36.8917
279	2017-11-10	19:00:00	74	36.56		80.9787	87.8261	91.8182		36.8248	36.8517	36.8658
280	2017-11-10	19:30:00	83	36.42		81.0638	88.4783	91.7273		36.8248	36.8375	36.8467
281	2017-11-10	20:00:00	81	36.87		81.1277	88.8696	90.8333		36.8306	36.8375	36.8608
282	2017-11-10	20:30:00	85	36.76		80.9574	89.6087	91.6667		36.8306	36.8329	36.8892
283	2017-11-10	21:00:00	83	36.81		80.8511	91.5217	88.6667		36.8317	36.8258	36.8842
284	2017-11-10	21:30:00	79	36.84		81	91.1739	88.0833		36.8333	36.8421	36.8633
285	2017-11-10	22:00:00	78	36.87		80.617	91.1739	86.25		36.8404	36.8421	36.845
286	2017-11-10	22:30:00	82	36.87		80.5319	91.3478	85.5833		36.8427	36.8375	36.8267
287	2017-11-10	23:00:00	76	36.87		80.4468	88	84.25		36.8427	36.8329	36.8175
288	2017-11-10	23:30:00	81	36.76		80.4468	87.4348	83.4167		36.8404	36.8329	36.7992
289	2017-11-11	00:00:00	75	36.87		80.4043	86.2609	81.8333		36.8404	36.8362	36.79
290	2017-11-11	00:30:00	80	36.59		80.7447	86.3043	79.75		36.8346	36.8246	36.7575
291	2017-11-11	01:00:00	81	36.76		80.5957	85.8261	80.3333		36.8323	36.82	36.7742
292	2017-11-11	01:30:00	73	36.53		80.1915	85.3478	79.5		36.8252	36.815	36.7833
293	2017-11-11	02:00:00	87	36.87		80.4894	85.4167	80		36.8252	36.8221	36.7833
294	2017-11-11	02:30:00	59	36.87		80.0213	84.75	77.8333		36.8275	36.8408	36.7925
295	2017-11-11	03:00:00	61	36.87		80.0638	82.3333	76		36.8298	36.8408	36.7975
296	2017-11-11	03:30:00	75	36.81		80.5319	81.875	75.6667		36.8285	36.8292	36.795
297	2017-11-11	04:00:00	69	36.76		80.234	80.5833	74.9167		36.824	36.8154	36.7858
298	2017-11-11	04:30:00	53	36.65		80.1702	79.0417	72.5		36.8171	36.7971	36.7675
299	2017-11-11	05:00:00	76	36.65		80.6596	78.375	72.5		36.8125	36.7833	36.7492
300	2017-11-11	05:30:00	81	36.65		80.9362	77.9583	72.5		36.8102	36.7696	36.74
301	2017-11-11	06:00:00	65	36.53		81.4468	76.75	71.6667		36.8031	36.7508	36.7117
302	2017-11-11	06:30:00	63	36.39		81.1915	75	70.25		36.7931	36.7262	36.695
303	2017-11-11	07:00:00	102	36.53		81.8723	76.1667	72		36.7883	36.725	36.6758
304	2017-11-11	07:30:00	110	36.65		82.766	77.2917	75.0833		36.786	36.7346	36.6858
305	2017-11-11	08:00:00	80	36.65		82.9362	77.25	74.5		36.7815	36.7254	36.6675
306	2017-11-11	08:30:00	82	37.09		83.234	77.125	76.4167		36.786	36.7392	36.6858
307	2017-11-11	09:00:00	88	36.9		84.2766	77.3333	78.6667		36.7844	36.7429	36.6883
308	2017-11-11	09:30:00	64	37.32		83.7872	76.7083	77.75		36.8025	36.7629	36.7308
309	2017-11-11	10:00:00	46	37.21		83.1064	75.375	75.8333		36.8096	36.7771	36.7683
310	2017-11-11	10:30:00	55	36.95		82.617	74.25	76		36.809	36.7804	36.7933
311	2017-11-11	11:00:00	87	36.67		81.2128	74.7083	76.9167		36.8025	36.7721	36.795
312	2017-11-11	11:30:00	83	36.76		80.9787	74.7917	77.0833		36.8025	36.7721	36.8042
313	2017-11-11	12:00:00	136	35.75		81.7021	77.3333	83		36.7808	36.7254	36.7392
314	2017-11-11	12:30:00	88	36.65		81.8936	77.6667	85.0833		36.7763	36.7279	36.7608
315	2017-11-11	13:00:00		36.25		81.6739	77.5217	83.5455		36.7633	36.7067	36.7375
316	2017-11-11	13:30:00	78	37.09		81.5435	77.7391	80.6364		36.7725	36.73	36.7742
317	2017-11-11	14:00:00	113	37.21		82.2128	78.8696	83.6364		36.7831	36.7442	36.8208
318	2017-11-11	14:30:00	82	37.32		82.3617	79.8696	83.6364		36.8019	36.7629	36.84
319	2017-11-11	15:00:00	92	37.21		81.7872	81.2174	84		36.809	36.7771	36.8658
320	2017-11-11	15:30:00	122	37.24		82.5532	83.2609	89.2727		36.8121	36.795	36.8592
321	2017-11-11	16:00:00	86	37.09		82.2553	84	92.9091		36.8121	36.8088	36.8492
322	2017-11-11	16:30:00	89	37.18		82.234	85.5652	96		36.814	36.8308	36.8683
323	2017-11-11	17:00:00	96	37.21		82.3191	86.4348	96.8182		36.8188	36.8542	36.9133
324	2017-11-11	17:30:00	88	36.98		82.2553	86.7391	97.2727		36.8188	36.8679	36.9317
325	2017-11-11	18:00:00	66	37.21		81.6596	86.7826	90.9091		36.8235	36.8963	37.0533
326	2017-11-11	18:30:00	105	37.09		81.6596	88.6087	92.4545		36.8258	36.9254	37.09
327	2017-11-11	19:00:00	74	36.98		81.6596	87.3913	90.9167		36.8346	36.9442	37.1508
328	2017-11-11	19:30:00	72	36.98		81.4255	85.7391	90.4167		36.8462	36.9579	37.1417
329	2017-11-11	20:00:00	74	36.98		81.2766	85.4783	87.1667		36.8485	36.9717	37.1225
330	2017-11-11	20:30:00	78	36.98		81.1277	85.3043	86.8333		36.8531	36.9671	37.0942
331	2017-11-11	21:00:00	78	36.87		81.0213	84.8696	85.6667		36.8544	36.9658	37.0658
332	2017-11-11	21:30:00	83	36.87		81.1064	85.6957	82.4167		36.855	36.9471	37.035
333	2017-11-11	22:00:00	84	36.98		81.234	87.3478	82.25		36.8573	36.9375	37.0258
334	2017-11-11	22:30:00	81	37.09		81.2128	88.4783	81.5833		36.8619	36.9433	37.0183
335	2017-11-11	23:00:00	66	37.21		81	87.5652	79.0833		36.869	36.9658	37.0183
336	2017-11-11	23:30:00	89	36.73		81.1702	87.8261	79.1667		36.8683	36.9646	36.9975
337	2017-11-12	00:00:00	80	36.98		81.2766	85.3913	80.3333		36.8706	37.0158	36.9783
338	2017-11-12	00:30:00	74	36.98		81.1489	84.7826	77.75		36.8787	37.0296	36.9692
339	2017-11-12	01:00:00	80	36.98		81.1277	84.5833	78.25		36.8833	37.06	36.9692
340	2017-11-12	01:30:00	75	36.98		81.1702	84.4583	78.5		36.8927	37.0554	36.9692
341	2017-11-12	02:00:00	101	37.12		81.4681	83.9583	80.75		36.8979	37.0517	36.9808
342	2017-11-12	02:30:00	72	37.09		81.7447	83.5417	80.25		36.9025	37.0421	36.99
343	2017-11-12	03:00:00	75	37.09		82.0426	82.8333	80		36.9071	37.0371	37.0083
344	2017-11-12	03:30:00	74	37.09		82.0213	80.8333	79.25		36.9129	37.0308	37.0267
345	2017-11-12	04:00:00	63	37.09		81.8936	79.875	77.5		36.9198	37.0308	37.0358
346	2017-11-12	04:30:00	65	37.09		82.1489	78.875	76.1667		36.929	37.0271	37.0358
347	2017-11-12	05:00:00	58	36.98		81.766	77.2917	75.5		36.9358	37.0175	37.0167
348	2017-11-12	05:30:00	56	36.98		81.234	75.9583	72.75		36.9427	37.0175	37.0375
349	2017-11-12	06:00:00	71	36.98		81.3617	76.1667	72		36.9521	37.0079	37.0375
350	2017-11-12	06:30:00	84	36.53		81.8085	75.2917	72.8333		36.955	36.9846	37
351	2017-11-12	07:00:00	80	36.76		81.3404	75.5417	72.8333		36.9598	36.9754	36.9817
352	2017-11-12	07:30:00	96	36.87		81.0426	76.5417	74.5833		36.9644	36.9708	36.9725
353	2017-11-12	08:00:00	66	36.87		80.7447	76.2083	71.6667		36.969	36.9663	36.9517
354	2017-11-12	08:30:00	113	36.42		81.4043	77.6667	75.0833		36.955	36.9429	36.8958
355	2017-11-12	09:00:00	64	36.81		80.8936	77.0833	74.1667		36.9531	36.9404	36.8725
356	2017-11-12	09:30:00	77	36.87		81.1702	76.8333	74.4167		36.9437	36.9404	36.8542
357	2017-11-12	10:00:00	102	36.76		82.3617	77.5833	77.6667		36.9344	36.9312	36.8267
358	2017-11-12	10:30:00	96	36.53		83.234	78.2083	80.25		36.9256	36.9079	36.78
359	2017-11-12	11:00:00	105	36.98		83.617	79.8333	84.1667		36.9321	36.8983	36.78
360	2017-11-12	11:30:00	81	36.87		83.5745	79.5	86.25		36.9344	36.9042	36.7708
361	2017-11-12	12:00:00	88	37.09		82.5532	79.8333	87.6667		36.9623	36.9088	36.78
362	2017-11-12	12:30:00	68	36.76		82.1277	79.5833	86.3333		36.9646	36.8996	36.7992
363	2017-11-12	13:00:00	85	36.31		82.1875	79.7917	86.75		36.9658	36.8717	36.7617
364	2017-11-12	13:30:00	91	36.79		82.4583	80.4583	86.3333		36.9596	36.8638	36.755
365	2017-11-12	14:00:00	144	36.87		83.1042	82.25	92.8333		36.9525	36.8533	36.755
366	2017-11-12	14:30:00	93	37.07		83.3333	83.125	91.1667		36.9473	36.8525	36.8092
367	2017-11-12	15:00:00	107	37.12		83.6458	84.4583	94.75		36.9454	36.8538	36.835
368	2017-11-12	15:30:00	52	37.21		82.1875	83.5417	92.6667		36.9448	36.8588	36.8633
369	2017-11-12	16:00:00	102	37.12		82.5208	85.1667	92.6667		36.9454	36.86	36.8933
370	2017-11-12	16:30:00		37.24		82.383	86.0435	92.3636		36.9467	36.8663	36.9525
371	2017-11-12	17:00:00	97	37.09		82.4043	87.7391	91.6364		36.9442	36.8708	36.9617
372	2017-11-12	17:30:00	115	37.32		82.9787	90.3043	94.7273		36.9512	36.885	36.9992
373	2017-11-12	18:00:00	87	37.43		83.4255	91	94.6364		36.9558	36.9038	37.0275
374	2017-11-12	18:30:00	75	37.21		82.7872	90.6087	95.2727		36.9583	36.9321	37.065
375	2017-11-12	19:00:00	82	36.98		82.9574	90.6957	95		36.9583	36.9413	37.1208
376	2017-11-12	19:30:00	82	36.98		83.1702	90.087	94.1818		36.9583	36.9458	37.1367
377	2017-11-12	20:00:00	85	36.87		83.4043	90.913	88.8182		36.956	36.9458	37.1367
378	2017-11-12	20:30:00	72	36.87		83.2766	89.1304	86.9091		36.9537	36.9646	37.12
379	2017-11-12	21:00:00	78	36.76		83.2766	89.7391	84.2727		36.9515	36.9625	37.09
380	2017-11-12	21:30:00	68	36.65		82.9574	89.3478	85.7273		36.9469	36.9533	37.0433
381	2017-11-12	22:00:00	75	36.87		82.766	88.1739	83.2727		36.9446	36.9579	37.0225
382	2017-11-12	22:30:00	69	36.87		82.5106	87	82.0833		36.94	36.9721	36.9917
383	2017-11-12	23:00:00	92	36.87		83.0638	86.4348	81.6667		36.9329	36.9675	36.9733
384	2017-11-12	23:30:00	87	36.98		83.0213	86.6957	79.3333		36.9381	36.9721	36.945
385	2017-11-13	00:00:00	78	36.87		82.9787	86.2609	78.5833		36.9358	36.9629	36.8983
386	2017-11-13	00:30:00	75	36.98		83	86.5652	78.5833		36.9358	36.9721	36.8792
387	2017-11-13	01:00:00	69	36.98		82.766	85.8696	77.5		36.9358	37	36.8792
388	2017-11-13	01:30:00	78	37.09		82.8298	85.3043	77.1667		36.9381	37.0125	36.8883
389	2017-11-13	02:00:00	72	37.09		82.2128	82.1739	76.0833		36.9375	37.0217	36.9067
390	2017-11-13	02:30:00	74	36.98		82.2553	81.3478	76.25		36.9352	37.0179	36.9158
391	2017-11-13	03:00:00	72	36.87		82.1915	79.8261	75.75		36.9306	37.0075	36.925
392	2017-11-13	03:30:00	72	36.87		82.1489	80.6957	76.0833		36.926	36.9933	36.9433
393	2017-11-13	04:00:00	100	36.87		82.9362	80.6087	78.1667		36.9215	36.9829	36.9433
394	2017-11-13	04:30:00	64	36.76		82.9149	79.9167	77.75		36.9146	36.9629	36.9342
395	2017-11-13	05:00:00	57	36.76		82.8936	78.25	74.8333		36.91	36.9492	36.925
396	2017-11-13	05:30:00	45	36.65		82.6596	75.3333	71.3333		36.9031	36.9213	36.8975
397	2017-11-13	06:00:00	101	35.87		83.2979	75.9167	73.25		36.88	36.8563	36.8142
398	2017-11-13	06:30:00	80	36.42		83.2128	76.125	73.6667		36.8777	36.8233	36.7675
399	2017-11-13	07:00:00	80	36.53		83.2128	76.0417	74.5833		36.8729	36.8046	36.73
400	2017-11-13	07:30:00		36.65		82.9348	75.7826	74.2727		36.8683	36.7908	36.6933
401	2017-11-13	08:00:00	60	36.87		82.8043	74.6957	73.1818		36.8683	36.7908	36.675
402	2017-11-13	08:30:00	127	36.76		83.1087	77.087	78		36.8754	36.7863	36.6567
403	2017-11-13	09:00:00	85	36.65		83.5652	77.3913	79.1818		36.8721	36.7817	36.6383
404	2017-11-13	09:30:00	65	36.65		83.3043	77.2609	78.5455		36.8675	36.7817	36.62
405	2017-11-13	10:00:00	96	36.65		83.1739	78.1739	78.1818		36.8652	36.7725	36.6017
406	2017-11-13	10:30:00		36.76		82.8889	78.5909	79.6		36.87	36.7679	36.6017
407	2017-11-13	11:00:00	53	37.09		81.7333	76.8182	79.2		36.8723	36.7771	36.6292
408	2017-11-13	11:30:00	60	36.79		81.2667	75.5909	80.7		36.8706	36.7692	36.6408
409	2017-11-13	12:00:00	87	36.53		81.2444	76	79.3		36.859	36.755	36.6958
410	2017-11-13	12:30:00	93	36.76		81.8	76.8182	80.6		36.859	36.7458	36.7242
411	2017-11-13	13:00:00		36.65		81.7273	77.1905	80.6667		36.866	36.7321	36.7342
412	2017-11-13	13:30:00		36.98		81.5116	77.15	80.6667		36.87	36.7275	36.7617
413	2017-11-13	14:00:00	101	36.9		80.5116	78.6	85.2222		36.8706	36.7196	36.7642
414	2017-11-13	14:30:00	96	37.21		80.5814	79.7	81.7778		36.8735	36.7292	36.8017
415	2017-11-13	15:00:00	84	37.21		80.0465	80.3	81.6667		36.8754	36.7433	36.8483
416	2017-11-13	15:30:00	90	37.21		80.9302	81.2	84.4444		36.8754	36.7575	36.895
417	2017-11-13	16:00:00	88	37.09		80.6047	80.6	83.5556		36.8748	36.7667	36.9317
418	2017-11-13	16:30:00	93	37.09		80.8864	82.05	84.5		36.8717	36.7804	36.9592
419	2017-11-13	17:00:00	91	37.21		80.75	83.75	88.3		36.8742	36.7992	36.9692
420	2017-11-13	17:30:00	90	37.21		80.1818	86	91.3		36.8719	36.8225	37.0042
421	2017-11-13	18:00:00	85	37.21		80.1364	85.2	91.1		36.8673	36.8783	37.0608
422	2017-11-13	18:30:00	98	37.09		80.6591	86.1	91.6		36.8648	36.9063	37.0883
423	2017-11-13	19:00:00	79	37.21		80.5909	86.05	90.4545		36.8696	36.9346	37.135
424	2017-11-13	19:30:00	79	37.09		80.5227	85.7143	89.5		36.8719	36.9529	37.1442
425	2017-11-13	20:00:00	69	37.09		80.1591	86.1429	86.8333		36.8765	36.9621	37.16
426	2017-11-13	20:30:00	81	37.21		80.3636	83.9524	85.5833		36.8835	36.9808	37.16
427	2017-11-13	21:00:00	79	37.04		80.3864	83.6667	85.1667		36.8894	36.9971	37.1458
428	2017-11-13	21:30:00	75	36.98		80.5455	84.1429	83.9167		36.8963	37.0108	37.1267
429	2017-11-13	22:00:00	78	36.98		80.6136	83.2857	83.0833		36.8985	37.0246	37.1175
430	2017-11-13	22:30:00	83	36.87		80.9318	83.2727	82.25		36.8985	37.0292	37.0992
431	2017-11-13	23:00:00	66	36.87		80.3409	83.8636	80.1667		36.8985	37.02	37.0708
432	2017-11-13	23:30:00	83	36.81		80.25	84.9091	79.5833		36.895	37.0208	37.0375
433	2017-11-14	00:00:00	105	36.76		80.8636	85.7273	81.25		36.8927	37.0304	37
434	2017-11-14	00:30:00	85	36.81		81.0909	85.3636	80.1667		36.8892	37.0325	36.9767
435	2017-11-14	01:00:00	86	36.76		81.4773	85.3913	80.75		36.8846	37.0371	36.9392
436	2017-11-14	01:30:00	91	36.76		81.7727	85.625	81.75		36.8777	37.0279	36.9117
437	2017-11-14	02:00:00	77	36.65		81.8864	84.625	82.4167		36.8685	37.0175	36.875
438	2017-11-14	02:30:00	79	36.76		82	83.9167	82.25		36.864	36.9987	36.8375
439	2017-11-14	03:00:00	77	36.87		82.1136	83.625	82.0833		36.864	36.9846	36.8233
440	2017-11-14	03:30:00	78	36.87		82.25	83.125	82.3333		36.864	36.9704	36.8142
441	2017-11-14	04:00:00	59	36.87		81.3182	81.9167	80.75		36.864	36.9612	36.805
442	2017-11-14	04:30:00	53	36.76		81.0682	80.25	78.25		36.864	36.9475	36.7958
443	2017-11-14	05:00:00	67	36.76		81.2955	79.25	78.3333		36.864	36.9288	36.7867
444	2017-11-14	05:30:00	64	36.76		81.7273	78.1667	76.75		36.8662	36.91	36.7825
445	2017-11-14	06:00:00	72	36.76		81.0682	77.625	74		36.8848	36.8912	36.7825
446	2017-11-14	06:30:00	66	36.65		80.75	76.2917	72.4167		36.8896	36.8729	36.7692
447	2017-11-14	07:00:00		36.65		80.7674	76.1739	71.1818		36.8921	36.8496	36.76
448	2017-11-14	07:30:00	70	36.65		80.5227	75.7826	69.2727		36.8921	36.8312	36.7508
449	2017-11-14	08:00:00	57	36.67		80.4545	75.2609	67.4545		36.8879	36.8137	36.7525
450	2017-11-14	08:30:00	59	36.87		78.9091	74.3043	65.6364		36.8902	36.7996	36.7617
451	2017-11-14	09:00:00		36.65		78.7674	74.0909	64.5		36.8902	36.7833	36.7433
452	2017-11-14	09:30:00	62	37.09		78.6977	73.5	62.9		36.8994	36.7879	36.7617
453	2017-11-14	10:00:00	52	36.98		77.6744	72.3182	62.2		36.9063	36.7879	36.7708
454	2017-11-14	10:30:00	60	37.09		77.2727	71.2727	62.9		36.9131	36.7971	36.7983
455	2017-11-14	11:00:00	107	36.7		78.5	73.1364	66.9		36.905	36.79	36.7933
456	2017-11-14	11:30:00	60	36.98		78.5	72.0909	66.5		36.909	36.7971	36.8117
457	2017-11-14	12:00:00	46	37.07		77.5682	69.4091	63.9		36.9202	36.81	36.8375
458	2017-11-14	12:30:00	39	36.98		76.3409	67.3182	61.2		36.9248	36.8171	36.865
459	2017-11-14	13:00:00	113	36.31		77.1556	68.5455	65.9091		36.9177	36.7983	36.8367
460	2017-11-14	13:30:00	18	36.09		75.8696	65.2273	61.1818		36.8992	36.7704	36.79
461	2017-11-14	14:00:00	51	36.65		74.7826	64.0455	60.6364		36.894	36.7704	36.7883
462	2017-11-14	14:30:00	94	36.87		74.7391	64.7273	63.8182		36.8869	36.775	36.7883
463	2017-11-14	15:00:00	91	37.21		74.8913	65.3636	66.0833		36.8869	36.7892	36.835
464	2017-11-14	15:30:00	94	37.21		74.9783	66.0909	68.75		36.8869	36.8033	36.845
465	2017-11-14	16:00:00	96	37.09		75.1522	67.7727	72.4167		36.8869	36.8125	36.8542
466	2017-11-14	16:30:00	94	37.09		75.1739	69.6364	75.25		36.8869	36.8263	36.8542
467	2017-11-14	17:00:00	89	37.09		75.1304	70.6364	73.75		36.8844	36.84	36.8867
468	2017-11-14	17:30:00	98	37.09		75.3043	72.1818	76.9167		36.8819	36.8538	36.8958
469	2017-11-14	18:00:00	90	37.09		75.413	73	80.5833		36.8794	36.8675	36.8975
470	2017-11-14	18:30:00	78	37.09		74.9783	73.5455	83.8333		36.8794	36.8858	36.9067
471	2017-11-14	19:00:00	76	37.09		74.913	73.6522	80.75		36.8769	36.9042	36.9717
472	2017-11-14	19:30:00	84	36.79		75.0217	74.2609	86.25		36.8706	36.91	37.03
473	2017-11-14	20:00:00	73	36.87		75.1087	74.9565	88.0833		36.866	36.9183	37.0483
474	2017-11-14	20:30:00	82	36.67		75.1304	75.9565	87.0833		36.8548	36.91	37.0317
475	2017-11-14	21:00:00	77	36.65		75.087	76	85.9167		36.8467	36.91	36.985
476	2017-11-14	21:30:00	86	36.65		75.3261	77	85.25		36.8398	36.8917	36.9383
477	2017-11-14	22:00:00	82	36.76		75.413	78.25	84.0833		36.8352	36.8825	36.9108
478	2017-11-14	22:30:00	83	36.76		75.413	79.2083	83.1667		36.8329	36.8687	36.8833
479	2017-11-14	23:00:00	81	36.65		75.7391	78.125	82.5		36.8283	36.8667	36.8467
480	2017-11-14	23:30:00	70	36.65		75.4565	78.5417	80.1667		36.825	36.8529	36.81
481	2017-11-15	00:00:00	71	36.65		74.7174	79.5833	78.5833		36.8227	36.8354	36.7733
482	2017-11-15	00:30:00	69	36.42		74.3696	80.8333	77.8333		36.8146	36.8121	36.7175
483	2017-11-15	01:00:00	78	36.65		74.1957	79.375	78		36.8123	36.8262	36.6808
484	2017-11-15	01:30:00	86	36.76		74.087	82.2083	78.1667		36.8123	36.8542	36.6783
485	2017-11-15	02:00:00	68	36.76		73.8913	82.9167	77.75		36.8146	36.8587	36.6692
486	2017-11-15	02:30:00	91	36.76		74.1522	82.7917	78.5		36.8146	36.8542	36.6767
487	2017-11-15	03:00:00	68	36.65		73.9565	81.8333	77.75		36.81	36.8308	36.6767
488	2017-11-15	03:30:00	70	36.53		73.7826	80.8333	76.4167		36.8029	36.8025	36.6667
489	2017-11-15	04:00:00	64	36.53		73.8913	79.5	74.9167		36.7958	36.7792	36.6475
490	2017-11-15	04:30:00	62	36.53		74.087	78.1667	73.1667		36.791	36.7558	36.6283
491	2017-11-15	05:00:00	86	36.53		74.5	78.0417	73.5833		36.7863	36.7325	36.6183
492	2017-11-15	05:30:00	51	36.53		74.2174	76.0833	72		36.7815	36.7092	36.6083
493	2017-11-15	06:00:00	70	36.42		74.1739	75.25	71.9167		36.7744	36.6812	36.5892
494	2017-11-15	06:30:00	170	36.2		76.4348	79.0833	80.3333		36.765	36.6442	36.5708
495	2017-11-15	07:00:00	28	36.31		75.4043	77.0833	76.1667		36.7579	36.6117	36.5425
496	2017-11-15	07:30:00	72	36.42		75.4468	76.5833	75		36.7531	36.5962	36.5142
497	2017-11-15	08:00:00		36.42		75.8478	76.7391	75.6364		36.7479	36.5775	36.4858
498	2017-11-15	08:30:00	98	36.31		76.6957	77.4348	76.2727		36.7363	36.5625	36.4483
499	2017-11-15	09:00:00	84	36.53		76.8511	77.7391	77.7273		36.7338	36.5575	36.4383
500	2017-11-15	09:30:00	42	36.98		76.4255	75.8261	75.1818		36.7315	36.5712	36.4758
501	2017-11-15	10:00:00	37	36.87		76.1064	73.8696	72.7273		36.7292	36.5758	36.5042
502	2017-11-15	10:30:00	67	36.87		76.2553	73.1739	73.1818		36.7246	36.5804	36.5325
503	2017-11-15	11:00:00	94	37.09		75.9787	73.7391	73.9091		36.7327	36.5987	36.5792
504	2017-11-15	11:30:00	197	36.65		78.8936	79.2609	87.1818		36.7258	36.5987	36.5892
505	2017-11-15	12:00:00	87	36.42		79.766	79.9565	88.7273		36.7123	36.5892	36.5892
506	2017-11-15	12:30:00	166	37.09		82.4681	84.1739	88.3636		36.7146	36.6171	36.6633
507	2017-11-15	13:00:00		36.87		81.8043	84.4545	94.4		36.7262	36.6262	36.71
508	2017-11-15	13:30:00	22	36.42		81.8913	81.5455	89.4		36.7331	36.6121	36.71
509	2017-11-15	14:00:00	120	36.42		83.3913	83.9091	92.1818		36.7283	36.5979	36.71
510	2017-11-15	14:30:00	19	36.76		81.7609	80.6364	85		36.726	36.5979	36.7475
511	2017-11-15	15:00:00	46	36.98		80.7826	79.6364	81.5455		36.7212	36.6117	36.785
512	2017-11-15	15:30:00	53	37.21		79.8913	78.8636	82.5455		36.7212	36.64	36.8042
513	2017-11-15	16:00:00	84	37.21		79.6304	79.7727	86.8182		36.7237	36.6683	36.8325
514	2017-11-15	16:30:00	97	37.32		79.6957	81.3636	89.5455		36.7285	36.7013	36.87
515	2017-11-15	17:00:00	16	37.09		78.1087	78.1818	82.4545		36.7285	36.7246	36.87
516	2017-11-15	17:30:00	100	37.32		78.1522	80.4091	73.6364		36.7333	36.7575	36.9258
517	2017-11-15	18:00:00	94	37.21		78.2391	81.5	74.2727		36.7358	36.7904	36.9917
518	2017-11-15	18:30:00		37.21		78.2444	77.2857	65.1		36.7383	36.8325	37.0017
519	2017-11-15	19:00:00	78	37.21		78.2889	79.6667	66.2727		36.7408	36.87	37.03
520	2017-11-15	19:30:00	87	37.09		78.3556	80.381	72.1818		36.7471	36.8979	37.0858
521	2017-11-15	20:00:00	45	36.98		77.7333	78.7727	65.3636		36.7494	36.9213	37.1325
522	2017-11-15	20:30:00	100	36.65		78.1333	78.8636	72.7273		36.749	36.9354	37.1233
523	2017-11-15	21:00:00	82	37.09		78.2444	78.7727	76		36.7581	36.9588	37.1325
524	2017-11-15	21:30:00	66	36.98		77.8	79.8636	77.1818		36.765	36.9588	37.1133
525	2017-11-15	22:00:00	82	36.98		77.8	81.9091	77		36.7696	36.9633	37.0942
526	2017-11-15	22:30:00	94	36.76		78.0444	83.1364	76.7273		36.7696	36.9588	37.0475
527	2017-11-15	23:00:00	72	36.98		77.8444	82.1364	81.8182		36.7765	36.9542	37.0383
528	2017-11-15	23:30:00	70	36.76		77.8444	76.3636	79.0909		36.7787	36.9588	36.9917
529	2017-11-16	00:00:00	79	36.87		78.0222	76	77.7273		36.7833	36.9775	36.9633
530	2017-11-16	00:30:00	78	36.84		78.2222	72	77.75		36.7921	36.9671	36.9325
531	2017-11-16	01:00:00	100	36.65		78.7111	73.2174	79.5833		36.7921	36.9579	36.8858
532	2017-11-16	01:30:00	63	36.67		78.2	75	77.5833		36.7902	36.9683	36.8508
533	2017-11-16	02:00:00	64	36.73		78.1111	72.5652	79.1667		36.7896	36.9812	36.83
534	2017-11-16	02:30:00	87	36.87		78.0222	75.5217	78.0833		36.7919	36.9858	36.8483
535	2017-11-16	03:00:00	81	36.9		78.3111	77.0435	78		36.7971	36.9825	36.8325
536	2017-11-16	03:30:00	87	36.87		78.6889	78.5217	79.75		36.8042	36.9683	36.8233
537	2017-11-16	04:00:00	76	36.98		78.9556	78.1739	79.25		36.8135	36.9588	36.8233
538	2017-11-16	04:30:00	101	36.98		79.8222	78.3478	79.8333		36.8229	36.9446	36.8417
539	2017-11-16	05:00:00	80	36.98		79.6889	81.1304	80.5		36.8323	36.94	36.8417
540	2017-11-16	05:30:00	76	36.98		80.2444	80.087	81		36.8417	36.9258	36.86
541	2017-11-16	06:00:00	84	36.45		80.5556	79.6522	81.4167		36.8423	36.8942	36.825
542	2017-11-16	06:30:00	84	36.2		78.6444	79.8333	81.9167		36.8423	36.8521	36.7717
543	2017-11-16	07:00:00		36.09		79.7955	79.913	80.2727		36.8377	36.8054	36.725
544	2017-11-16	07:30:00	44	36.65		79.1591	78.0435	78.5455		36.8425	36.7871	36.7233
545	2017-11-16	08:00:00	40	36.65		78.2889	77.8261	76.3636		36.8473	36.7733	36.7167
546	2017-11-16	08:30:00		36.65		77.8409	76.8182	75.3		36.8544	36.7733	36.6983
547	2017-11-16	09:00:00	77	36.53		77.6818	76.5909	74.9		36.8544	36.75	36.6675
548	2017-11-16	09:30:00	58	36.76		78.0455	76.2273	72		36.8498	36.7408	36.6583
549	2017-11-16	10:00:00	79	37.09		79	76.0909	72.3		36.8544	36.7454	36.6675
550	2017-11-16	10:30:00	80	37.15		79.2955	75.4545	70.2		36.8602	36.7617	36.6817
551	2017-11-16	11:00:00	68	36.98		78.7045	75.2727	69		36.8579	36.7617	36.6817
552	2017-11-16	11:30:00	75	36.98		75.9318	75.5	68.9		36.8648	36.7708	36.6817
553	2017-11-16	12:00:00	67	36.98		75.4773	74.9545	67.2		36.8765	36.7754	36.7258
554	2017-11-16	12:30:00		36.65		73.3721	74.8095	65.3333		36.8673	36.7675	36.7633
555	2017-11-16	13:00:00		36.87		73.3721	73.55	65.3333		36.8673	36.7767	36.8283
556	2017-11-16	13:30:00	141	36.53		76.1395	77.45	76.1111		36.8696	36.7708	36.8183
557	2017-11-16	14:00:00	62	37.09		74.7907	77.35	78.5556		36.8835	36.7858	36.855
558	2017-11-16	14:30:00	89	37.21		76.4186	77.45	79.6		36.8929	36.8	36.9017
559	2017-11-16	15:00:00	71	37.09		77	76.95	79		36.8952	36.8079	36.9483
560	2017-11-16	15:30:00	61	37.09		77.186	75.65	79.3		36.8927	36.8171	36.9758
561	2017-11-16	16:00:00	115	37.01		77.907	77.6	82.9		36.8885	36.8183	36.9692
562	2017-11-16	16:30:00	85	37.09		77.6279	76.8	83.4		36.8837	36.8229	36.9642
563	2017-11-16	17:00:00	89	36.98		79.3256	77.25	85.5		36.8815	36.8229	36.9642
564	2017-11-16	17:30:00	120	37.09		79.7907	79.45	90		36.8767	36.8275	36.9733
565	2017-11-16	18:00:00	72	37.21		79.2791	78.85	90.5		36.8767	36.8592	36.9925
566	2017-11-16	18:30:00	75	37.21		79.1818	78.4	89.0909		36.8767	36.9013	37.0392
567	2017-11-16	19:00:00	79	37.09		79.2045	78.4286	88.25		36.8742	36.9429	37.0575
568	2017-11-16	19:30:00	108	36.98		79.6818	81.4762	85.5		36.8719	36.9567	37.095
569	2017-11-16	20:00:00	82	36.87		80.5227	83.4762	87.1667		36.8696	36.9658	37.0767
570	2017-11-16	20:30:00	82	36.87		80.1136	83.4091	86.5833		36.8742	36.975	37.0483
571	2017-11-16	21:00:00	85	36.76		80.1818	83.7727	87.75		36.8673	36.9846	37.0208
572	2017-11-16	21:30:00	86	36.79		80.6364	85.0455	89.8333		36.8633	36.9858	36.9958
573	2017-11-16	22:00:00	81	36.87		80.6136	85.1364	87		36.861	36.9767	36.9842
574	2017-11-16	22:30:00	80	36.87		80.2955	85.1364	86.5833		36.8633	36.965	36.9658
575	2017-11-16	23:00:00	75	36.87		80.3636	85.4545	85.4167		36.861	36.9604	36.9567
576	2017-11-16	23:30:00	82	36.76		80.6364	85.7727	82.25		36.861	36.9513	36.9292
577	2017-11-17	00:00:00	64	36.67		80.2955	85.6364	81.5833		36.8569	36.9383	36.8842
578	2017-11-17	00:30:00	86	36.76		80.4773	85.6522	82.5		36.8552	36.9429	36.8467
579	2017-11-17	01:00:00	78	36.76		79.9773	85.3333	82.4167		36.8575	36.9383	36.8192
580	2017-11-17	01:30:00	73	36.93		80.2045	82.5	79.5		36.8629	36.955	36.815
581	2017-11-17	02:00:00	67	36.98		80.2727	82.7083	78.25		36.8681	36.9504	36.8242
582	2017-11-17	02:30:00	65	36.9		79.7727	81.7083	76.8333		36.8687	36.9375	36.8267
583	2017-11-17	03:00:00	76	36.9		79.6591	81.9167	76.0833		36.8687	36.9296	36.8383
584	2017-11-17	03:30:00	59	36.87		79.0227	81.8333	73.8333		36.8687	36.9204	36.845
585	2017-11-17	04:00:00	72	36.98		78.9318	80.0417	73.0833		36.8687	36.9192	36.8542
586	2017-11-17	04:30:00	75	36.98		78.3409	79.625	72.6667		36.8687	36.9146	36.8633
587	2017-11-17	05:00:00	84	36.53		78.4318	79.4167	73.4167		36.8594	36.8958	36.835
588	2017-11-17	05:30:00	120	36.53		79.4318	79.4167	76.5833		36.85	36.8725	36.8158
589	2017-11-17	06:00:00	115	36.42		80.1364	81.2083	80.8333		36.8494	36.8396	36.795
590	2017-11-17	06:30:00	133	37.09		81.25	83.625	84.75		36.8679	36.8346	36.8225
591	2017-11-17	07:00:00		36.79		81.25	83.8261	85.3636		36.8825	36.8221	36.825
592	2017-11-17	07:30:00	101	36.87		82.5455	83.5217	87.9091		36.8871	36.8175	36.82
593	2017-11-17	08:00:00	85	36.76		83.5682	83.6522	89.5455		36.8894	36.8129	36.8017
594	2017-11-17	08:30:00	40	36.51		82.6	81.8261	87.2727		36.8865	36.7979	36.7692
595	2017-11-17	09:00:00	92	36.76		82.9333	82.1304	88.7273		36.8913	36.7979	36.7575
596	2017-11-17	09:30:00	70	36.81		83.2	81.4348	89.7273		36.8923	36.7987	36.7525
597	2017-11-17	10:00:00	101	36.67		83.6889	82.3043	92.3636		36.8835	36.7904	36.7267
598	2017-11-17	10:30:00		37.09		83.7727	82.4091	94.1		36.8823	36.7996	36.7358
599	2017-11-17	11:00:00	90	36.76		84.2727	83.0909	94.7		36.8777	36.795	36.755
600	2017-11-17	11:30:00	46	36.76		83.6136	81.4545	87.3		36.8731	36.795	36.7742
601	2017-11-17	12:00:00	84	36.87		84	82.3636	84.2		36.8708	36.8033	36.8117
602	2017-11-17	12:30:00	153	36.87		85.5333	85.4091	86.2		36.8754	36.8079	36.7933
603	2017-11-17	13:00:00	92	36.76		85.6739	86.0455	86.7273		36.8731	36.8079	36.7908
604	2017-11-17	13:30:00	65	36.65		84.0217	85.6818	83.4545		36.8756	36.7963	36.7725
605	2017-11-17	14:00:00	83	37.21		84.4783	86.4091	83.2727		36.8781	36.8058	36.81
606	2017-11-17	14:30:00	87	37.21		84.4348	87.4091	87.5455		36.8781	36.8188	36.8683
607	2017-11-17	15:00:00	96	37.09		84.9783	88.3182	87.9091		36.8781	36.8267	36.8958
608	2017-11-17	15:30:00	92	37.21		85.6522	89.8182	89.9091		36.8806	36.8408	36.9292
609	2017-11-17	16:00:00	119	36.95		85.7391	91.9545	91.5455		36.8794	36.8396	36.9525
610	2017-11-17	16:30:00	69	37.21		85.3913	91.6818	89.6667		36.8819	36.8492	36.9625
611	2017-11-17	17:00:00		37.21		85.3111	92.0476	89.6364		36.8867	36.8775	37
612	2017-11-17	17:30:00	119	36.87		85.2889	92	96.2727		36.8821	36.8917	37.0092
613	2017-11-17	18:00:00	120	37.09		86.3556	92.2381	99.5455		36.8796	36.9196	37.0275
614	2017-11-17	18:30:00	78	37.32		86.4222	89.619	92.7273		36.8819	36.9292	37.065
615	2017-11-17	19:00:00	79	37.09		86.4222	89.1364	91.5455		36.8819	36.9417	37.0925
616	2017-11-17	19:30:00	75	36.87		85.6889	87.9545	92.4545		36.8796	36.9417	37.1108
617	2017-11-17	20:00:00	91	36.87		85.8889	88.2273	93.1818		36.8796	36.9463	37.0825
618	2017-11-17	20:30:00	87	36.98		86	90.3636	93.1818		36.8819	36.9658	37.0633
619	2017-11-17	21:00:00	92	37.09		86.1556	90.3636	92.8182		36.8887	36.9796	37.0633
620	2017-11-17	21:30:00	93	37.21		86.3111	91.4091	92.9091		36.8975	36.9963	37.0633
621	2017-11-17	22:00:00	83	36.98		86.3556	90.5909	89.6364		36.8998	37.0092	37.0658
622	2017-11-17	22:30:00	81	36.98		86.3778	90.1739	90.7273		36.9021	37.0046	37.0467
623	2017-11-17	23:00:00	74	36.87		86.3556	89.4783	89.3333		36.9021	37.0092	37.0183
624	2017-11-17	23:30:00	83	36.76		86.3778	91.087	86.3333		36.9021	37.0092	37.0092
625	2017-11-18	00:00:00	65	36.76		86.4	90.2609	81.75		36.904	37.0046	36.9817
626	2017-11-18	00:30:00	85	36.76		86.3778	87.3043	82.3333		36.904	37	36.935
627	2017-11-18	01:00:00	83	36.76		86.4889	86.913	82.6667		36.904	37	36.9075
628	2017-11-18	01:30:00	85	36.65		86.7556	87.7826	83.5		36.8981	37	36.8892
629	2017-11-18	02:00:00	75	36.65		86.9333	87.4348	82.1667		36.8912	36.9767	36.8708
630	2017-11-18	02:30:00	75	36.65		87.1556	86.913	81.1667		36.886	36.9533	36.8433
631	2017-11-18	03:00:00	91	36.65		87.4889	86.6957	81.0833		36.8808	36.935	36.8067
632	2017-11-18	03:30:00	72	36.76		87.7778	85.8261	79.3333		36.8785	36.9162	36.7692
633	2017-11-18	04:00:00	87	36.98		88.1111	84.4348	79.6667		36.8785	36.9175	36.7692
634	2017-11-18	04:30:00	83	36.98		88.2889	85.0435	79.8333		36.8785	36.9079	36.7692
635	2017-11-18	05:00:00	78	37.09		88.1556	84.75	80.1667		36.8902	36.9029	36.7875
[truncated: 8,505 more rows]

## Sheet: No.56
No	Date	Time	Heart rate(bpm)	Temp(°C)		HR 24h average	HR 12h average	HR 6h average		Tb 24h average	Tb 12h average	Tb 6h average
[truncated: 11,737 more rows]

[truncated: 2 more sheets: No.114, No.184]
